# Supplementary material
Source: PubMed Central journal article supplement (PMC3973018)
Supplement: NIHMS536922-supplement-1.pdf [file NIHMS536922-supplement-1.pdf]

**Genome-wide meta-analysis identifies 11 new loci for anthropometric traits and provides  
insights into genetic architecture**  
**SUPPLEMENTARY INFORMATION**

---

1. SUPPLEMENTARY TABLES, page 2
2. SUPPLEMENTARY FIGURES, page 91
3. SUPPLEMENTARY NOTE, page 105
  - A. Summary Of Literature Search On Genes Nearest To The 11 Novel Loci
  - B. Detailed Methods Description
  - C. Full List of Acknowledgements
  - D. References

## 1. SUPPLEMENTARY TABLES

**Supplementary Table 1. Total number of subjects for stage 1 and stage 2 for each anthropometric trait outcome**

| Trait           | Stage 1 <sup>a</sup>     | Stage 2 <sup>b</sup>     | Stage 1 + Stage 2 <sup>c</sup> |
|-----------------|--------------------------|--------------------------|--------------------------------|
|                 | No. cases / No. controls | No. cases / No. controls | No. cases / No. controls       |
| Overweight      | 93,015 / 65,840          | 65,332 / 39,294          | 158,306 / 105,101              |
| Obesity Class 1 | 32,858 / 65,839          | 22,373 / 39,060          | 55,229 / 104,894               |
| Obesity Class 2 | 9,889 / 62,657           | 5,476 / 35,430           | 15,334 / 97,858                |
| Obesity Class 3 | 2,896 / 47,468           | 1,162 / 22,307           | 3,986 / 67,010                 |
| BMI tails       | 7,962 / 8,106            | 4,900 / 4,891            | 12,735 / 12,864                |
| Height tails    | 8,097 / 8,099            | 4,872 / 4,831            | 12,926 / 12,888                |
| WHR tails       | 4,774 / 5,481            | 3,351 / 3,352            | 7,969 / 8,683                  |

<sup>a</sup>The study bases for the stage 1 cases and controls were: 158,864 (BMI), 168,267 (Height) and 100,605 (WHR)

<sup>b</sup>The study bases for the stage 2 cases and controls were: 109,703 (BMI), 107,740 (Height) and 75,220 (WHR)

<sup>c</sup>The study bases for the stage 1+2 cases and controls were: 268,567 (BMI), 276,007 (Height) and 175,825 (WHR)

**Supplementary Table 2. Study design, number of individuals, and sample quality control for studies in stage 1, stage 2, or ancillary analyses**

| Study            |                                                                         | Study design                        | Ethnicity      | Total sample size (N) | Sample QC  |                                                                                                                                                                                                                                                                                                                 | Samples in analyses (N) | Anthropometric assessment method | References                                                                                                                                                                                                                                                                                                                                                                                                                                                                                                                                                                                         |
|------------------|-------------------------------------------------------------------------|-------------------------------------|----------------|-----------------------|------------|-----------------------------------------------------------------------------------------------------------------------------------------------------------------------------------------------------------------------------------------------------------------------------------------------------------------|-------------------------|----------------------------------|----------------------------------------------------------------------------------------------------------------------------------------------------------------------------------------------------------------------------------------------------------------------------------------------------------------------------------------------------------------------------------------------------------------------------------------------------------------------------------------------------------------------------------------------------------------------------------------------------|
| Short name       | Full name                                                               |                                     |                |                       | Call rate* | Other exclusions                                                                                                                                                                                                                                                                                                |                         |                                  |                                                                                                                                                                                                                                                                                                                                                                                                                                                                                                                                                                                                    |
| <b>Stage 1:</b>  |                                                                         |                                     |                |                       |            |                                                                                                                                                                                                                                                                                                                 |                         |                                  |                                                                                                                                                                                                                                                                                                                                                                                                                                                                                                                                                                                                    |
| ADVANCE controls | Atherosclerotic Disease, Vascular Function, and Genetic Epidemiology    | Population-based case-control study | White European | 311                   | ≥ 98.5%    | 1) Gender Descrepancies, 2) related individuals and duplicates, 3) ethnic outliers                                                                                                                                                                                                                              | 311                     | measured                         | [PMID: 18443000] Assimes, T. L., J. W. Knowles, et al. (2008). "Susceptibility locus for clinical and subclinical coronary artery disease at chromosome 9p21 in the multi-ethnic ADVANCE study." <i>Hum Mol Genet</i> 17(15): 2320-2328.                                                                                                                                                                                                                                                                                                                                                           |
| ADVANCE cases    | Atherosclerotic Disease, Vascular Function, and Genetic Epidemiology    | Population-based case-control study | White European | 275                   | ≥ 98.5%    | 1) Gender Descrepancies, 2) related individuals and duplicates, 3) ethnic outliers                                                                                                                                                                                                                              | 275                     | measured                         | [PMID: 18443000] Assimes, T. L., J. W. Knowles, et al. (2008). "Susceptibility locus for clinical and subclinical coronary artery disease at chromosome 9p21 in the multi-ethnic ADVANCE study." <i>Hum Mol Genet</i> 17(15): 2320-2328.                                                                                                                                                                                                                                                                                                                                                           |
| AGES             | Age, Gene/Environment Susceptibility-Reykjavik Study                    | Population-based                    | White European | 3219                  | ≥ 97%      | 1) mismatch with previous genotypes; 2) remove A/T & G/C SNPs; 3) remove SNPs not in HapMap                                                                                                                                                                                                                     | 3219                    | measured                         | [PMID: 17351290] Harris et al. Age, Gene/Environment Susceptibility-Reykjavik Study: multidisciplinary applied phenomics. <i>American Journal of Epidemiology</i> (2007) vol. 165 (9) pp. 1076-87                                                                                                                                                                                                                                                                                                                                                                                                  |
| ARIC             | Atherosclerosis Risk in Communities Study                               | Population-based                    | White European | 8861                  | ≥ 90%      | 1) True sex/gender mismatch<br>2) Discordant genotype with earlier TaqMan genotyping. If >10/47 genotypes discordant -> exclude<br>3) First-degree relative<br>4) PC>8SD in Eigenstrat run (10 iterations with 10 PCs)<br>5) Outlier based on average IBS<br>6) missing height and/or weight or other covariate | 8108                    | measured                         | [PMID: 2646917] Atherosclerosis Risk in Communities (ARIC) Study: design and objectives. 1989. ARIC Investigators. <i>Am. J. Epidemiol.</i> 129: 687-702.                                                                                                                                                                                                                                                                                                                                                                                                                                          |
| B58C-T1DGC       | British 1958 birth cohort (Type 1 Diabetes Genetic Consortium controls) | Population-based                    | White European | 2592                  | ≥ 98%      | 1) contamination; 2) non-European identity; 3) Missing or invalid height, weight, waist or hip.                                                                                                                                                                                                                 | 2591                    | measured                         | [PMID: 17255346] Strachan DP, Rudnicka AR, Power C, Shepherd P, Fuller E, Davis A, Gibb I, Kumari M, Rumley A, Macfarlane GJ, Rahi J, Rodgers B, Stansfeld S. Lifecourse influences on health among British adults: effects of region of residence in childhood and adulthood. <i>Int J Epidemiol</i> 2007;36:522-531. [PMID: 19430480] Barrett JC, Clayton DG, Concannon P, Akolkar B, Cooper JD, Erlich HA, Julier C, Morahan G, Nerup J, Nierras C, Plagnol V, Pociot F, Schuilenburg H, Smyth DJ, Stevens H, Todd JA, Walker NM, Rich SS; The Type 1 Diabetes Genetics Consortium. Genome-wide |

Supplementary Table 2. Study design, number of individuals, and sample quality control for studies in stage 1, stage 2, or ancillary analyses

| Study          |                                                                             | Study design                          | Ethnicity      | Total sample size (N) | Sample QC  |                                                                                                                                                           | Samples in analyses (N) | Anthropometric assessment method | References                                                                                                                                                                                                                                                                                                                                                             |
|----------------|-----------------------------------------------------------------------------|---------------------------------------|----------------|-----------------------|------------|-----------------------------------------------------------------------------------------------------------------------------------------------------------|-------------------------|----------------------------------|------------------------------------------------------------------------------------------------------------------------------------------------------------------------------------------------------------------------------------------------------------------------------------------------------------------------------------------------------------------------|
| Short name     | Full name                                                                   |                                       |                |                       | Call rate* | Other exclusions                                                                                                                                          |                         |                                  |                                                                                                                                                                                                                                                                                                                                                                        |
|                |                                                                             |                                       |                |                       |            |                                                                                                                                                           |                         |                                  | association study and meta-analysis find that over 40 loci affect risk of type 1 diabetes. Nat Genet 2009 May 10.                                                                                                                                                                                                                                                      |
| B58C-WTCCC     | British 1958 birth cohort (Wellcome Trust Case Control Consortium controls) | Population-based                      | White European | 1502                  | ≥ 97%      | 1) contamination;<br>2) non-European identity;<br>3) Missing or invalid height, weight, waist or hip.                                                     | 1479                    | measured                         | <b>[PMID: 17554300]</b> The Wellcome Trust Case Control Consortium Genome-wide association study of 14,000 cases of seven common diseases and 3,000 shared controls. Nature 447, 661-678 (2007).<br><b>[PMID: 16155052]</b> Power, C. & Elliott, J. Cohort profile: 1958 British birth cohort (National Child Development Study). Int. J. Epidemiol. 35, 34-41 (2006). |
| BRIGHT         | British Genetics of Hypertension (BRIGHT) Study                             | Hypertensive cases                    | White European | 2000                  | ≥ 97%      | 1) heterozygosity <23% or >30%<br>2) external discordance<br>3) non-European ancestry<br>4) duplicate/first/second degree relatives.                      | 1895                    | measured                         | <b>[PMID: 17554300]</b> The Wellcome Trust Case Control Consortium Genome-wide association study of 14,000 cases of seven common diseases and 3,000 shared controls. Nature 447, 661-678 (2007).<br><b>[PMID: 12826435]</b> Caulfield, M. et al. Genome-wide mapping of human loci for essential hypertension. Lancet 361, 2118-2123 (2003).                           |
| CAD WTCCC      | WTCCC Coronary Heart Disease cases                                          | Case series                           | White European | 2000                  | ≥ 97%      | 1) heterozygosity <23% or >30%;<br>2) discrepancy with external identifying information;<br>3) ethnic outliers;<br>4) related individuals and duplicates; | 1876                    | self reported                    | <b>[PMID: 17554300]</b> The Wellcome Trust Case Control Consortium Genome-wide association study of 14,000 cases of seven common diseases and 3,000 shared controls. Nature 447, 661-678 (2007)                                                                                                                                                                        |
| CAPS1 Cases    | Cancer Prostate in Sweden 1                                                 | Case-control study of prostate cancer | White European | 505                   | > 95%      | 1) related individuals and duplicates;<br>2) ethnic outliers;<br>3) missing body weight and height.                                                       | 505                     | self-reported                    | <b>[PMID: 18073375]</b> Duggan D, et al. Two genome-wide association studies of aggressive prostate cancer implicate putative prostate tumor suppressor gene DAB2IP. J Natl Cancer Inst 2007 Dec 19;99(24):1836-44 (2007).                                                                                                                                             |
| CAPS1 Controls | Cancer Prostate in Sweden 1                                                 | Case-control study of prostate cancer | White European | 506                   | > 95%      | 1) related individuals and duplicates;<br>2) ethnic outliers;<br>3) missing body weight and height.                                                       | 506                     | self-reported                    | <b>[PMID: 18073375]</b> Duggan D, et al. Two genome-wide association studies of aggressive prostate cancer implicate putative prostate tumor suppressor gene DAB2IP. J Natl Cancer Inst 2007 Dec 19;99(24):1836-44 (2007).                                                                                                                                             |

**Supplementary Table 2. Study design, number of individuals, and sample quality control for studies in stage 1, stage 2, or ancillary analyses**

| Study             |                                                                                                                                                                                   | Study design                          | Ethnicity                    | Total sample size (N) | Sample QC  |                                                                                                                                                                                                                                                                                                         | Samples in analyses (N) | Anthropometric assessment method | References                                                                                                                                                                                                                                |
|-------------------|-----------------------------------------------------------------------------------------------------------------------------------------------------------------------------------|---------------------------------------|------------------------------|-----------------------|------------|---------------------------------------------------------------------------------------------------------------------------------------------------------------------------------------------------------------------------------------------------------------------------------------------------------|-------------------------|----------------------------------|-------------------------------------------------------------------------------------------------------------------------------------------------------------------------------------------------------------------------------------------|
| Short name        | Full name                                                                                                                                                                         |                                       |                              |                       | Call rate* | Other exclusions                                                                                                                                                                                                                                                                                        |                         |                                  |                                                                                                                                                                                                                                           |
| CAPS2 Cases       | Cancer Prostate in Sweden 2                                                                                                                                                       | Case-control study of prostate cancer | White European               | 1483                  | > 95%      | 1) related individuals and duplicates;<br>2) ethnic outliers;<br>3) missing body weight and height.                                                                                                                                                                                                     | 1483                    | self-reported                    | <b>[PMID: 18073375]</b> Duggan D, et al. Two genome-wide association studies of aggressive prostate cancer implicate putative prostate tumor suppressor gene DAB2IP. J Natl Cancer Inst 2007 Dec 19;99(24):1836-44 (2007).                |
| CAPS2 Controls    | Cancer Prostate in Sweden 2                                                                                                                                                       | Case-control study of prostate cancer | White European               | 519                   | > 95%      | 1) related individuals and duplicates;<br>2) ethnic outliers;<br>3) missing body weight and height.                                                                                                                                                                                                     | 519                     | self-reported                    | <b>[PMID: 18073375]</b> Duggan D, et al. Two genome-wide association studies of aggressive prostate cancer implicate putative prostate tumor suppressor gene DAB2IP. J Natl Cancer Inst 2007 Dec 19;99(24):1836-44 (2007).                |
| CHS               | Cardiovascular Health Study                                                                                                                                                       | Population-based                      | Caucasian                    | 3329                  | ≥ 95%      | 1) sex mismatch or discordance with prior genotyping;<br>2) none whites;<br>3) Missing body weight and height.                                                                                                                                                                                          | 3228                    | measured                         | <b>[PMID: 1669507]</b> Fried LP, Borhani NO, Enright P, Furberg CD, Gardin JM, Kronmal RA, Kuller LH, Manolio TA, Mittelmark MB, Newman A, et al. The Cardiovascular Health Study: design and rationale. Ann Epidemiol. 1991;1(3):263-276 |
| CoLaus            | Cohorte Lausannoise                                                                                                                                                               | Population-based                      | White European               | 6188                  | > 90%      | 1) ethnic outliers;<br>2) related individuals and duplicates;<br>3) Missing height                                                                                                                                                                                                                      | 5435                    | measured                         | <b>[PMID 18366642]</b> Firmann et al. The CoLaus study: a population-based study to investigate the epidemiology and genetic determinants of cardiovascular risk factors and metabolic syndrome BMC Cardiovascular Disorders 2008, 8:6    |
| COROGENE controls | COROGENE-STUDY Genetic Predisposition of Coronary Heart Disease in Patients Verified with Coronary Angiogram (controls for this study are a part of the National FINRISK Studies) | Case-control                          | White European: Finnish-only | 2066                  | ≥ 95%      | 1) SNP clustering probability for each genotype > 95%<br>2) Call rate > 95% both individuals and markers<br>3) MAF > 1%<br>4) HWE p > 1*10 <sup>-6</sup><br>5)heterozygosity, gender check and relatedness checks have been performed and any discrebansies have been removed.<br>6) Missing phenotype. | 1890                    | measured                         | <b>[PMID: 21642350]</b> Vaara, S. et al. Cohort profile:The Corogene Study. Int J Epidemiol. 2011 Jun 3. Epub ahead of print.                                                                                                             |
| COROGENE cases    | COROGENE-STUDY Genetic Predisposition of Coronary Heart Disease in Patients Verified with Coronary Angiogram                                                                      | Case-control                          | White European: Finnish-only | 2597                  | ≥ 95%      | 1) SNP clustering probability for each genotype > 95%<br>2) Call rate > 95% both individuals and markers<br>3) MAF > 1%<br>4) HWE p >                                                                                                                                                                   | 2240                    | measured                         | <b>[PMID: 21642350]</b> Vaara, S. et al. Cohort profile:The Corogene Study. Int J Epidemiol. 2011 Jun 3. Epub ahead of print.                                                                                                             |

**Supplementary Table 2. Study design, number of individuals, and sample quality control for studies in stage 1, stage 2, or ancillary analyses**

| Study              |                                                                              | Study design     | Ethnicity      | Total sample size (N) | Sample QC  |                                                                                                                                                                                                   | Samples in analyses (N) | Anthropometric assessment method | References                                                                                                                                                                                                                                                                     |
|--------------------|------------------------------------------------------------------------------|------------------|----------------|-----------------------|------------|---------------------------------------------------------------------------------------------------------------------------------------------------------------------------------------------------|-------------------------|----------------------------------|--------------------------------------------------------------------------------------------------------------------------------------------------------------------------------------------------------------------------------------------------------------------------------|
| Short name         | Full name                                                                    |                  |                |                       | Call rate* | Other exclusions                                                                                                                                                                                  |                         |                                  |                                                                                                                                                                                                                                                                                |
|                    |                                                                              |                  |                |                       |            | 1*10 <sup>-6</sup><br>5)heterozygosity, gender check and relatedness checks have been performed and any discrebansies have been removed.<br>6) Missing phenotype.                                 |                         |                                  |                                                                                                                                                                                                                                                                                |
| deCODE             | deCODE genetics sample set                                                   | Population-based | White European | 38446                 | ≥ 96%      | 1) Missing body weight and height.                                                                                                                                                                | 26799                   | measured                         | <b>[PMID: 19079260]</b> Thorleifsson, G. et al. Genome-wide association yields new sequence variants at seven loci that associate with measures of obesity. Nat Genet. 41, 18-24 (2009).                                                                                       |
| DGI controls       | Diabetes Genetics Initiative                                                 | Case-control     | White European | 1464                  | ≥ 95%      | 1) Related individuals and duplicates<br>2) Sex mismatch<br>3) Phenotype missing                                                                                                                  | 1317                    | measured                         | <b>[PMID: 17463246]</b> Saxena, R. et al. Genome-wide association analysis identifies loci for type 2 diabetes and triglyceride levels. Science. Science 2007;316(5829):1331-6.                                                                                                |
| DGI Cases          | Diabetes Genetics Initiative                                                 | Case-control     | White European | 1467                  | ≥ 95%      | 1) Related individuals and duplicates<br>2) Sex mismatch<br>3) Phenotype missing                                                                                                                  | 1090                    | measured                         | <b>[PMID: 17463246]</b> Saxena, R. et al. Genome-wide association analysis identifies loci for type 2 diabetes and triglyceride levels. Science. Science 2007;316(5829):1331-6.                                                                                                |
| EGCUT              | Estonian Genme Center of University of Tartu                                 | Population-based | Estonians      | 2734                  | ≥ 95%      | 1) ethnic outliers;<br>2) related individuals and duplicates;<br>3) Missing body weight and height.                                                                                               | 2685                    | measured                         | <b>[PMID: 19424496]</b> Nelis M. et al. Genetic structure of Europeans: a view from the North-East. PLoS One. 2009;4(5):e5472.                                                                                                                                                 |
| EPIC-Obesity Study | European Prospective Investigation into Cancer and Nutrition - Obesity Study | Population-based | White European | 2566                  | ≥ 94%      | 1) heterozygosity <23% or >30%;<br>2) >5.0% discordance in SNP pairs with r2= 1 in HapMap;<br>3) ethnic outliers;<br>4) related individuals and duplicates;<br>5) Missing body weight and height. | 2415                    | measured                         | <b>[PMID: 10466767]</b> Day,N.E. et al. EPIC-Norfolk: study design and characteristics of the cohort. European Prospective Investigation of Cancer. British Journal of Cancer 80, 95-103 (1999).<br><b>[PMID: 18454148]</b> Loos,R.J. et al. Common variants near MC4R are ass |
| ERF                | Erasmus Rucphen Family                                                       | Family-based     | White European | 2386                  | ≥ 95%      | 1) heterozygosity;<br>2)high IBS > 95%;<br>3) ethnic outliers;<br>4) Gender mismatch;<br>5) Missing phenotypes.                                                                                   | 2095                    | measured                         | <b>[PMID: 15054401]</b> Aulchenko YS, Heutink P, Mackay I, Bertoli-Avella AM, Pullen J, Vaessen N et al. Linkage disequilibrium in young genetically isolated Dutch population. Eur J Hum Genet 2004; 12(7): 527-534.                                                          |

**Supplementary Table 2. Study design, number of individuals, and sample quality control for studies in stage 1, stage 2, or ancillary analyses**

| Study           |                                                       | Study design                                 | Ethnicity         | Total sample size (N) | Sample QC  |                                                                                                                                                             | Samples in analyses (N) | Anthropometric assessment method | References                                                                                                                                                                                                                                                                                                                                                                                                                                                                                                                                                                                                                                                                                                                                                                  |
|-----------------|-------------------------------------------------------|----------------------------------------------|-------------------|-----------------------|------------|-------------------------------------------------------------------------------------------------------------------------------------------------------------|-------------------------|----------------------------------|-----------------------------------------------------------------------------------------------------------------------------------------------------------------------------------------------------------------------------------------------------------------------------------------------------------------------------------------------------------------------------------------------------------------------------------------------------------------------------------------------------------------------------------------------------------------------------------------------------------------------------------------------------------------------------------------------------------------------------------------------------------------------------|
| Short name      | Full name                                             |                                              |                   |                       | Call rate* | Other exclusions                                                                                                                                            |                         |                                  |                                                                                                                                                                                                                                                                                                                                                                                                                                                                                                                                                                                                                                                                                                                                                                             |
| FamHS (Stage 1) | Family Heart Study                                    | Case (Coronary Artery Calcification)-control | European American | 3659                  | N.A.       | 1) Non- European American descent;<br>2) Missing body weight and height                                                                                     | 856                     | measured                         | <b>[PMID: 8651220]</b> Higgins M, Province M, Heiss G, Eckfeldt J, Ellison RC, Folsom AR, Rao DC, Sprafka JM, Williams R. NHLBI Family Heart Study: objectives and design. <i>Am J Epidemiol.</i> 1996;143:1219-28.                                                                                                                                                                                                                                                                                                                                                                                                                                                                                                                                                         |
| FENLAND         | Fenland Study                                         | Population-based                             | White European    | 1500                  | ≥ 95%      | 1) heterozygosity <27.3% or >28.8%;<br>2) duplicate check;<br>3) relatedness check                                                                          | 1402                    | measured                         | <b>[PMID: 19079261]</b> Willer CJ, Speliotes EK, Loos RJ, et al. Six new loci associated with body mass index highlight a neuronal influence on body weight regulation. <i>Nat Genet</i> 2009, 41:25-34.                                                                                                                                                                                                                                                                                                                                                                                                                                                                                                                                                                    |
| FRAM            | Framingham Heart Study                                | Population-based, multi-generational         | White European    | 9274                  | ≥ 97%      | 1) pHWE<1e-6call rate<97%<br>2) mishap p<1e-9<br>3) MAF<0.01<br>4) Mendelian errors>100<br>5) SNPs not in Hapmap or strandedness issues merging with Hapmap | 8094                    | measured                         | <b>[PMID 14025561]</b> DAWBER TR, KANNEL WB, LYELL LP. An approach to longitudinal studies in a community: the Framingham Study. <i>Ann N Y Acad Sci.</i> 1963;107:539-556.<br><b>[PMID 1208363]</b> Feinleib M, KANNEL WB, Garrison RJ, McNamara PM, Castelli WP. The Framingham Offspring Study. Design and preliminary data. <i>Prev Med.</i> 1975;4:518-525.<br><b>[PMID 17372189]</b> Splansky GL, Corey D, Yang Q et al. The Third Generation Cohort of the National Heart, Lung, and Blood Institute's Framingham Heart Study: design, recruitment, and initial examination. <i>Am J Epidemiol.</i> 2007;165:1328-1335.                                                                                                                                              |
| FUSION controls | Finland□United States Investigation of NIDDM Genetics | Case□control study                           | White European    | 1173                  | > 97.5%    | 1) related individuals;<br>2) missing BMI                                                                                                                   | 1171                    | measured                         | <b>[PMID: 17463248]</b> Scott, L.J., Mohlke, K.L., Bonnycastle, L.L., Willer, C.J., Li, Y., Duren, W.L., Erdos, M.R., Stringham, H.M., Chines, P.S., Jackson, A.U., Prokunina-Olsson L., Ding, C.J., Swift, A.J., Narisu, N., Hu, T., Pruim, R., Xiao, R., Li, X.Y., Conneely, K.N., Riebow, N.L., Sprau, A.G., Tong, M., White, P.P., Hetrick, K.N., Barhnart, M.W., Bark, C.W., Goldstein, J.L., Watkins, L., Xiang, F., Saramies, J., Buchanan, T.A., Watanabe, R.M., Valle, T.T., Kinnunen, L., Abecasis, G.R., Pugh, E.W., Doheny, K.F., Bergman, R.N., Tuomilehto, J., Collins, F.S., Boehnke, M. A Genome-Wide Association Study of Type 2 Diabetes in Finns Detects Multiple Susceptibility Variants. <i>Science</i> 2007 Jun 1;316(5829):1341-5. Epub 2007 Apr 26. |

**Supplementary Table 2. Study design, number of individuals, and sample quality control for studies in stage 1, stage 2, or ancillary analyses**

| Study        |                                                                                 | Study design                      | Ethnicity                | Total sample size (N) | Sample QC  |                                                                                                                                                          | Samples in analyses (N) | Anthropometric assessment method | References                                                                                                                                                                                                                                                                                                                                                                                                                                                                                                                                                                                                                                                                                                                                                                                                                                                                                                                            |
|--------------|---------------------------------------------------------------------------------|-----------------------------------|--------------------------|-----------------------|------------|----------------------------------------------------------------------------------------------------------------------------------------------------------|-------------------------|----------------------------------|---------------------------------------------------------------------------------------------------------------------------------------------------------------------------------------------------------------------------------------------------------------------------------------------------------------------------------------------------------------------------------------------------------------------------------------------------------------------------------------------------------------------------------------------------------------------------------------------------------------------------------------------------------------------------------------------------------------------------------------------------------------------------------------------------------------------------------------------------------------------------------------------------------------------------------------|
| Short name   | Full name                                                                       |                                   |                          |                       | Call rate* | Other exclusions                                                                                                                                         |                         |                                  |                                                                                                                                                                                                                                                                                                                                                                                                                                                                                                                                                                                                                                                                                                                                                                                                                                                                                                                                       |
| FUSION Cases | Finland-United States Investigation of NIDDM Genetics                           | Case-control study                | White European           | 1160                  | > 97.5%    | 1) related individuals;<br>2) missing BMI                                                                                                                | 1092                    | measured                         | <b>[PMID: 17463248]</b> Scott, L.J., Mohlke, K.L., Bonnycastle, L.L., Willer, C.J., Li, Y., Duren, W.L., Erdos, M.R., Stringham, H.M., Chines, P.S., Jackson, A.U., Prokunina-Olsson L., Ding, C.J., Swift, A.J., Narisu, N., Hu, T., Pruim, R., Xiao, R., Li, X.Y., Conneely, K.N., Riebow, N.L., Sprau, A.G., Tong, M., White, P.P., Hetrick, K.N., Barhnart, M.W., Bark, C.W., Goldstein, J.L., Watkins, L., Xiang, F., Saramies, J., Buchanan, T.A., Watanabe, R.M., Valle, T.T., Kinnunen, L., Abecasis, G.R., Pugh, E.W., Doheny, K.F., Bergman, R.N., Tuomilehto, J., Collins, F.S., Boehnke, M. A Genome-Wide Association Study of Type 2 Diabetes in Finns Detects Multiple Susceptibility Variants. Science 2007 Jun 1;316(5829):1341-5. Epub 2007 Apr 26. Health 2000. March 09th, 2009 [cited 2010 26.11.2010]; Available from: <a href="http://www.terveys2000.fi/indexe.html">http://www.terveys2000.fi/indexe.html</a> |
| GENMETS      | Health 2000 study subset of Metabolic syndrome cases and their matched controls | Case - control                    | White European           | 2124                  | > 95%      | 1) heterozygosity<br>2) gender check<br>3) ethnic outliers<br>4) cryptic relatedness<br>5) related individuals and duplicates                            | 1705                    | measured                         | HEALTH AND FUNCTIONAL CAPACITY IN FINLAND, Baseline Results of the Health 2000 Health Examination Survey. In: Aromaa A, Koskinen S, editors. Helsinki: National Public Health Institute; 2004.                                                                                                                                                                                                                                                                                                                                                                                                                                                                                                                                                                                                                                                                                                                                        |
| GerMIFS1     | German Myocard Infarct Family Study                                             | Case - control study (only cases) | European (german people) | 875                   | ≥ 97%      | 1) heterozygosity + 3 * sd<br>2) related individuals and duplicates<br>3) Missing phenotypes                                                             | 875                     | measured                         | <b>[PMID: 17634449]</b> Samani NJ et al. Genomewide association analysis of coronary artery disease.                                                                                                                                                                                                                                                                                                                                                                                                                                                                                                                                                                                                                                                                                                                                                                                                                                  |
| GerMIFS2     | German Myocard Infarct Family Study                                             | Case - control study (only cases) | European (german people) | 1222                  | ≥ 97%      | 1) heterozygosity + 3 * sd<br>2) related individuals and duplicates<br>3) Missing phenotypes                                                             | 1222                    | measured                         | <b>[PMID: 19198612]</b> Erdmann J. Genomewide association analysis of coronary artery disease.                                                                                                                                                                                                                                                                                                                                                                                                                                                                                                                                                                                                                                                                                                                                                                                                                                        |
| GOOD         | Gothenburg Osteoporosis and Obesity Determinants Study                          | Population-based                  | White European           | 1056                  | ≥ 97.5%    | 1) heterozygosity > 33%;<br>2) ethnic outliers;<br>3) related individuals and duplicates.                                                                | 938                     | measured                         | <b>[PMID: 16007330]</b> Lorentzon, M. et al Free testosterone is a positive whereas free estradiol is a negative predictor of cortical bone size in young Swedish men-The GOOD Study. J Bone Miner Res 20, 1334-1341 (2005).                                                                                                                                                                                                                                                                                                                                                                                                                                                                                                                                                                                                                                                                                                          |
| HBCS         | Helsinki Birth Cohort Study                                                     | Birth-cohort                      | White European: Finnish  | 1872                  | ≥ 95%      | 1) SNP clustering probability for each genotype > 95%<br>2) Call rate > 95% both individuals and markers<br>3) MAF > 1%<br>4) HWE p > 1*10 <sup>-6</sup> | 1739                    | measured                         | <b>[PMID: 16881894]</b> Eriksson, J.G. Early growth and adult health outcomes -- lessons learned from the Helsinki Birth Cohort Study. Matern Child Nutr. 2005 Jul;149-54. Review.                                                                                                                                                                                                                                                                                                                                                                                                                                                                                                                                                                                                                                                                                                                                                    |



Supplementary Table 2. Study design, number of individuals, and sample quality control for studies in stage 1, stage 2, or ancillary analyses

| Study         |                                                                    | Study design                              | Ethnicity               | Total sample size (N) | Sample QC  |                                                                                                                                                                                                                                                                                         | Samples in analyses (N) | Anthropometric assessment method | References                                                                                                                                                                                                                                                                                                                                                              |
|---------------|--------------------------------------------------------------------|-------------------------------------------|-------------------------|-----------------------|------------|-----------------------------------------------------------------------------------------------------------------------------------------------------------------------------------------------------------------------------------------------------------------------------------------|-------------------------|----------------------------------|-------------------------------------------------------------------------------------------------------------------------------------------------------------------------------------------------------------------------------------------------------------------------------------------------------------------------------------------------------------------------|
| Short name    | Full name                                                          |                                           |                         |                       | Call rate* | Other exclusions                                                                                                                                                                                                                                                                        |                         |                                  |                                                                                                                                                                                                                                                                                                                                                                         |
| KORA S3       | Cooperative Health Research in the Region of Augsburg              | Population-based                          | White European          | 1644                  | ≥ 93%      | 5) heterozygosity, gender check and relatedness checks have been performed and any discrepancies have been removed.<br>6) Missing phenotype.<br>1) German passport;<br>2) missing phenotypes.                                                                                           | 1638-1643               | measured                         | [PMID: 16032514] Wichmann HE et al. KORA-gen--resource for population genetics, controls and a broad spectrum of disease phenotypes. Gesundheitswesen 67 Suppl 1, S26-30 (2005).                                                                                                                                                                                        |
| KORA S4       | Cooperative Health Research in the Region of Augsburg              | Population-based                          | White European          | 1814                  | ≥ 93%      | 1) German passport;<br>2) missing phenotypes.                                                                                                                                                                                                                                           | 1811-1812               | measured                         | [PMID: 16032514] Wichmann HE et al. KORA-gen--resource for population genetics, controls and a broad spectrum of disease phenotypes. Gesundheitswesen 67 Suppl 1, S26-30 (2005).                                                                                                                                                                                        |
| MGS           | Molecular Genetics of Schizophrenia/NIMH Repository Control Sample | Population-based (survey research method) | European ancestry (USA) | 2681                  | 0.997      | 1) call rate < 97% for samples, 95% for SNP;<br>2) heterozygosity < 26% or > 28.5%;<br>3) excess duplicate discordancies or mendelian errors (SNPs);<br>4) ethnic outliers (principal component scores);<br>5) related individuals and duplicates;<br>6) Missing body weight or height. | 2597                    | self-report                      | [PMID: 19571809] Shi, J, et al. Common variants on chromosome 6p22.1 are associated with schizophrenia. Nature. 2009 Aug 6;460(7256):753-7.<br>[PMID: 18198266] Sanders, A.R. No significant association of 14 candidate genes with schizophrenia in a large European ancestry sample: implications for psychiatric genetics. Am J Psychiatry. 2008 Apr;165(4):497-506. |
| MICROS        | Microisolates in South Tyrol                                       | Population-based                          | White European          | 1269                  | 0.98       | 1) Gender mismatch<br>2) Genetic outliers                                                                                                                                                                                                                                               | 1097                    | measured                         | [PMID: 17550581] Pattaro C, Marroni F, Riegler A, Mascalzoni D, Pichler I, et al. (2007) The genetic study of three population microisolates in South Tyrol (MICROS): study design and epidemiological perspectives. BMC Med Genet 8: 29.                                                                                                                               |
| Migen (cases) | Myocardial Infarction Genetics Consortium                          | Case control forearly onset MI            | European                | 1420                  | ≥ 95%      | 1) Cohort deficient or excess heterozygosity<br>2) Population Stratification outliers<br>3) Close Relatives and Sample Duplicates<br>4) Sample Contamination                                                                                                                            | 1274                    | measured                         | [PMID: 19198609] Kathiresan et al. Genome-wide association of early-onset myocardial infarction with single nucleotide polymorphisms and copy number variants. Nature Genetics 41, 334-41 (2009).                                                                                                                                                                       |

Supplementary Table 2. Study design, number of individuals, and sample quality control for studies in stage 1, stage 2, or ancillary analyses

| Study            |                                           | Study design                    | Ethnicity      | Total sample size (N) | Sample QC  |                                                                                                                                                                                                                                            | Samples in analyses (N) | Anthropometric assessment method | References                                                                                                                                                                                                                                                                                                                  |
|------------------|-------------------------------------------|---------------------------------|----------------|-----------------------|------------|--------------------------------------------------------------------------------------------------------------------------------------------------------------------------------------------------------------------------------------------|-------------------------|----------------------------------|-----------------------------------------------------------------------------------------------------------------------------------------------------------------------------------------------------------------------------------------------------------------------------------------------------------------------------|
| Short name       | Full name                                 |                                 |                |                       | Call rate* | Other exclusions                                                                                                                                                                                                                           |                         |                                  |                                                                                                                                                                                                                                                                                                                             |
|                  |                                           |                                 |                |                       |            | (excess close low level genomes sharing )5) missing body weight or height                                                                                                                                                                  |                         |                                  |                                                                                                                                                                                                                                                                                                                             |
| Migen (controls) | Myocardial Infarction Genetics Consortium | Case control for early onset MI | European       | 1558                  | ≥ 95%      | 1) Cohort deficient or excess heterozygosity<br>2) Population Stratification outliers<br>3) Close Relatives and Sample Duplicates<br>4) Sample Contamination (excess close low level genome sharing)<br>5) missing body weight or height   | 1407                    | measured                         | <b>[PMID: 19198609]</b> Kathiresan et al. Genome-wide association of early onset myocardial infarction with single nucleotide polymorphisms and copy number variants. Nature Genetics 41, 334-41 (2009).                                                                                                                    |
| NBS WTCCC        | WTCCC National Blood Service donors       | Population-based                | White European | 1500                  | ≥ 97%      | 1) heterozygosity <23% or >30%;<br>2) discrepancy with external identifying information;<br>3) ethnic outliers;<br>4) related individuals and duplicates;                                                                                  | 1437                    | self reported                    | <b>[PMID: 17554300]</b> The Wellcome Trust Case Control Consortium Genome-wide association study of 14,000 cases of seven common diseases and 3,000 shared controls. Nature 447, 661-678 (2007)                                                                                                                             |
| NHS              | The Nurses' Health Study                  | Nested Case-control             | White European | 2,287                 | >98%       | 1) Sex discrepancy with genetic data from X-linked markers;<br>2) Duplicates and first/second degree relatives;<br>3) Ancestry outliers;<br>4) Heterozygosity;<br>5) Autosomal chromosome aberrations;<br>6) Missing phenotype information | 2,120                   | self-report                      | <b>[PMID: 15864280]</b> Colditz GA, Hankinson SE (2005) The Nurses' Health Study: lifestyle and health among women. <b>[PMID: 20418489]</b> Qi L, Cornelis MC, Kraft P, Stanya KJ, Linda Kao WH, et al. (2010) Genetic variants at 2q24 are associated with susceptibility to type 2 diabetes. Hum Mol Genet 19: 2706-2715. |
| NFBC             | Northern Finland Birth Cohort 1966        | Population-based                | White European | 5654                  | ≥ 95%      | 1) gender discrepancy with genetic data from X-linked markers; 2)                                                                                                                                                                          | 4773                    | measured                         | <b>[PMID: 19060910]</b> Sabatti, C. et al. Genome-wide association analysis of metabolic traits in a birth cohort from a founder population. Nat Genet (2008).                                                                                                                                                              |

**Supplementary Table 2. Study design, number of individuals, and sample quality control for studies in stage 1, stage 2, or ancillary analyses**

| Study                      |                                                                              | Study design     | Ethnicity              | Total sample size (N) | Sample QC  |                                                                                                                                                    | Samples in analyses (N) | Anthropometric assessment method | References                                                                                                                                                                                                                                                                                                                                                                                                                                                                                                              |
|----------------------------|------------------------------------------------------------------------------|------------------|------------------------|-----------------------|------------|----------------------------------------------------------------------------------------------------------------------------------------------------|-------------------------|----------------------------------|-------------------------------------------------------------------------------------------------------------------------------------------------------------------------------------------------------------------------------------------------------------------------------------------------------------------------------------------------------------------------------------------------------------------------------------------------------------------------------------------------------------------------|
| Short name                 | Full name                                                                    |                  |                        |                       | Call rate* | Other exclusions                                                                                                                                   |                         |                                  |                                                                                                                                                                                                                                                                                                                                                                                                                                                                                                                         |
| NSPHS                      | Northern Sweden population health study                                      | Population       | White European         | 700                   | 0.98       | withdrawn consent;<br>3) duplicates and first and second degree relatives;<br>4) contaminated samples<br>1) Gender mismatch<br>2) Genetic outliers | 656                     | measured                         | <b>[PMID: 20568910]</b> Igl W, Johansson A, Gyllensten U. The Northern Swedish Population Health Study (NSPHS)--a paradigmatic study in a rural population combining community health and basic research. <i>Rural Remote Health</i> . 2010 Apr-Jun;10(2):1363. Epub 2010 Jun 18.<br><b>[PMID: 18952825]</b> Johansson A et.al. Common variants in the JAZF1 gene associated with height identified by linkage and genome-wide association analysis. <i>Hum Mol Genet</i> . 2009 Jan 15;18(2):373-80. Epub 2008 Oct 24. |
| NTR and NESDA MDD controls | The Netherlands Twin Register and Nederlandse Studie naar Depressie en Angst | Case-control     | White European         | 1802                  | >90%       | 1) Contamination;<br>2) cryptic relatedness and ethnic outliers ;3) gender mismatch;<br>4) Missing body weight and height                          | 1800                    | questionnaire and measured       | <b>[PMID: 19065144]</b> Sullivan PF et al. Genome-wide association for major depressive disorder: a possible role for the presynaptic protein piccolo. <i>Mol Psychiatry</i> . 14:650-2 (2009)                                                                                                                                                                                                                                                                                                                          |
| NTR and NESDA MDD cases    | The Netherlands Twin Register and Nederlandse Studie naar Depressie en Angst | Case-control     | White European         | 1738                  | >90%       | 1) Contamination;<br>2) cryptic relatedness and ethnic outliers ; 3) gender mismatch;<br>4) Missing body weight and height                         | 1731                    | questionnaire and measured       | <b>[PMID: 2047772]</b> Willemsen et al. The Netherlands Twin Register biobank: a resource for genetic epidemiological studies. <i>Twin Res Hum Genet</i> . 13:231-45 (2010)                                                                                                                                                                                                                                                                                                                                             |
| ORCADES                    | Orkney Complex Disease Study                                                 | Population-based | White European         | 761                   | 0.98       | 1) Gender mismatch<br>2) Genetic outliers                                                                                                          | 716                     | measured                         | <b>[PMID: 18760389]</b> McQuillan.R., Leutenegger.A.L., Abdel-Rahman.R., Franklin.C.S., Pericic.M., Barac-Lauc.L., Smolej-Narancic.N., Janicijevic.B., Polasek.O., Tenesa.A., et al. (2008) Runs of homozygosity in European populations. <i>American Journal of Human Genetics</i> , 83, 359-372.                                                                                                                                                                                                                      |
| PLCO                       | Prostate, Lung, Colorectal, and Ovarian Cancer Screening Trial               | Population-based | Non-Hispanic Caucasian | 2298                  | ≥ 94%      | 1) Gender discordance<br>2) Non-European ancestry<br>3) Related individuals and duplicates;<br>4) Missing phenotype data                           | 2238                    | self-report                      | <b>[PMID: 17401363]</b> Yeager M, et al. Genome-wide association study of prostate cancer identifies a second risk locus at 8q24. <i>Nat Genet</i> 39, 645-9 (2007).                                                                                                                                                                                                                                                                                                                                                    |
| PROCARDIS                  | Precocious Coronary Artery Disease (ProCARDIS)                               | Case-control     | White European         | 2573                  | > 95%      | none                                                                                                                                               | 2573                    | measured                         | <b>[PMID: 18048406]</b> Broadbent, H.M. et al. Susceptibility to coronary artery disease and diabetes is encoded by distinct, tightly linked SNPs in the ANRIL locus on chromosome 9p. <i>Hum Mol Genet</i> 17, 806-14 (2008).                                                                                                                                                                                                                                                                                          |

**Supplementary Table 2. Study design, number of individuals, and sample quality control for studies in stage 1, stage 2, or ancillary analyses**

| Study           |                                                                                                                                  | Study design                        | Ethnicity      | Total sample size (N) | Sample QC  |                                                                                                                                                                                                                                                                                                                            | Samples in analyses (N) | Anthropometric assessment method | References                                                                                                                                                                                                                                                                                                                                                                                                                                                                                                                                                      |
|-----------------|----------------------------------------------------------------------------------------------------------------------------------|-------------------------------------|----------------|-----------------------|------------|----------------------------------------------------------------------------------------------------------------------------------------------------------------------------------------------------------------------------------------------------------------------------------------------------------------------------|-------------------------|----------------------------------|-----------------------------------------------------------------------------------------------------------------------------------------------------------------------------------------------------------------------------------------------------------------------------------------------------------------------------------------------------------------------------------------------------------------------------------------------------------------------------------------------------------------------------------------------------------------|
| Short name      | Full name                                                                                                                        |                                     |                |                       | Call rate* | Other exclusions                                                                                                                                                                                                                                                                                                           |                         |                                  |                                                                                                                                                                                                                                                                                                                                                                                                                                                                                                                                                                 |
| RUNMC           | Radboud University Nijmegen Medical Centre, composed of Nijmegen Bladder Cancer Study (NBCS) and Nijmegen Biomedical Study (NBS) | Population-based                    | White European | 3081                  | ≥ 96%      | 1) Missing body weight and height.                                                                                                                                                                                                                                                                                         | 2873                    | measured                         | [PMID: 17568781] Wetzels, J.F. et al. Age- and gender-specific reference values of estimated GFR in Caucasians: the Nijmegen Biomedical Study. <i>Kidney Int</i> 72, 632-637 (2007).<br>[PMID: 18794855] Kiemeny, L.A. et al. Sequence variant on 8q24 confers susceptibility to urinary bladder cancer. <i>Nat Genet</i> 40, 1307-1312 (2008).                                                                                                                                                                                                                 |
| RS1             | Rotterdam Study I                                                                                                                | Population Based                    | White European | 7983                  | ≥ 97.5%    | 1) missing DNA;<br>2) gender mismatch with typed X-linked markers;<br>3) excess autosomal heterozygosity > 0.336~FDR>0.1% ;<br>4) duplicates and/or 1st or 2nd degree relatives using IBS probabilities >97% from PLINK;<br>5) ethnic outliers using IBS distances > 3SD from PLINK;<br>6) Missing body weight and height. | 5743                    | measured                         | [PMID: 11753597] {Visscher, 2001 A comparison of body mass index, waist-hip ratio and waist circumference as predictors of all-cause mortality among the elderly: the Rotterdam study};<br>[PMID:19700477] {Estrada, 2009 GRIMP: a web- and grid-based tool for high-speed analysis of large-scale genome-wide association using imputed data};<br>[PMID:21877163] {Hofman, 2011 The Rotterdam Study: 2012 objectives and design update.};<br>[PMID:1833235] {Hofman, 1991 Determinants of disease and disability in the elderly: the Rotterdam Elderly Study}; |
| SASBAC controls | Swedish And Singapore Breast Association Consortium                                                                              | Case-control study of breast cancer | White European | 764                   | ≥ 96%      | 1) related individuals and duplicates;<br>2) ethnic outliers;<br>3) missing body weight and height.                                                                                                                                                                                                                        | 764                     | self-reported                    | [PMID: 10209946] Magnusson, C. et al. Breast-cancer risk following long-term oestrogen- and oestrogen-progestin-replacement therapy. <i>Int J Cancer</i> 81, 339-44 (1999).<br>[PMID: 17132159] Einarsdóttir, K. et al. Comprehensive analysis of the ATM, CHEK2 and ERBB2 genes in relation to breast tumour characteristics and survival: a population-based case-control and follow-up study. <i>Breast Cancer Res</i> 8, R67 (2006).                                                                                                                        |
| SASBAC cases    | Swedish And Singapore Breast Association Consortium                                                                              | Case-control study of breast cancer | White European | 803                   | ≥ 96%      | 1) related individuals and duplicates;<br>2) ethnic outliers;<br>3) missing body weight and height.                                                                                                                                                                                                                        | 795                     | self-reported                    | [PMID: 10209946] Magnusson, C. et al. Breast-cancer risk following long-term oestrogen- and oestrogen-progestin-replacement therapy. <i>Int J Cancer</i> 81, 339-44 (1999).<br>[PMID: 17132159] Einarsdóttir, K. et al. Comprehensive analysis of the ATM, CHEK2 and ERBB2 genes in relation to breast tumour characteristics and survival: a population-based case-control and follow-up study. <i>Breast Cancer Res</i> 8, R67 (2006).                                                                                                                        |

Supplementary Table 2. Study design, number of individuals, and sample quality control for studies in stage 1, stage 2, or ancillary analyses

| Study        |                                                                                                        | Study design                 | Ethnicity      | Total sample size (N) | Sample QC  |                                                                                                                                                           | Samples in analyses (N) | Anthropometric assessment method | References                                                                                                                                                                                                                                                                                                                      |
|--------------|--------------------------------------------------------------------------------------------------------|------------------------------|----------------|-----------------------|------------|-----------------------------------------------------------------------------------------------------------------------------------------------------------|-------------------------|----------------------------------|---------------------------------------------------------------------------------------------------------------------------------------------------------------------------------------------------------------------------------------------------------------------------------------------------------------------------------|
| Short name   | Full name                                                                                              |                              |                |                       | Call rate* | Other exclusions                                                                                                                                          |                         |                                  |                                                                                                                                                                                                                                                                                                                                 |
| SARDINIA     | SARDINIA study on aging                                                                                | Family-based                 | White European | 4305                  | >90%       | 1) Missing body weight and height<br>2) related individuals                                                                                               | 889                     | measured                         | [PMID: 16934002] Pilia, G. et al. Heritability of cardiovascular and personality traits in 6,148 Sardinians. <i>PLoS Genet</i> 2, e132 (2006). [PMID 18193045] Sanna S et al. Common variants in the GDF5-UQCC region are associated with variation in human height. <i>Nat Genet.</i> 2008 Feb;40(2):198-203. Epub 2008 Jan 13 |
| SEARCH/UKOPS | Studies of Epidemiology and Risk factors in Cancer Heredity / UK Ovarian Cancer Population Study       | Population-based case series | White European | 1710                  | ≥95%       | 1) ethnic outliers<br>2) duplicates<br>3) Missing body weight and height                                                                                  | 1556                    | self-assessed                    | [PMID: 19648919] H. Song, S. J. Ramus, J. Tyrer et al. A genome-wide association study identifies a new ovarian cancer susceptibility locus on 9p22.2. <i>Nature Genetics</i> , 41, p996-1000, (2009).                                                                                                                          |
| SHIP         | Study of Health in Pomerania                                                                           | Population-based             | White European | 4308                  | >92%       | 1) missing genotype or phenotype data<br>2) reported vs. genotyped gender mismatch<br>3) duplicates                                                       | 4070                    | measured                         | [PMID: 20167617] Völzke H. et al. Cohort profile: the study of health in Pomerania. <i>Int J Epidemiol.</i> 2011 Apr;40(2):294-307.                                                                                                                                                                                             |
| Sorbs        | population-based study of the Sorbs, self-contained population of Slavonic origin from Eastern Germany | Population-based             | White European | 1097                  | ≥ 94%      | 1) ethnic outliers;<br>2) duplicates<br>3) gender mismatch                                                                                                | 941                     | measured                         | [PMID: 19584900] Tönjes A. et al. Association of FTO variants with BMI and fat mass in the self-contained population of Sorbs in Germany. PMID: 21559053                                                                                                                                                                        |
| TWINSUK      | TwinsUK                                                                                                | Twins pop                    | White European | 2226                  | ≥ 95%      | 1) heterozygosity <33% or >37%;<br>2) ethnic outliers;<br>3) related individuals and duplicates;<br>4) Missing body weight and height.                    | 1479                    | measured                         | [PMID: 17254428] Spector, T.D., Williams, F.M. The UK Adult Twin Registry (TwinsUK). <i>Twin Res Hum Genet</i> 9, 899-906 (2006). [PMID: 12537873] Spector, T.D., MacGregor, A.J. The St. Thomas' UK Adult Twin Registry. <i>Twin Res</i> 5, 440-443 (2002).                                                                    |
| T2D WTCCC    | WTCCC Type 2 Diabetes cases                                                                            | Case series                  | White European | 1999                  | ≥ 97%      | 1) heterozygosity <23% or >30%;<br>2) discrepancy with external identifying information;<br>3) ethnic outliers;<br>4) related individuals and duplicates; | 1903                    | measured                         | [PMID: 17554300] The Wellcome Trust Case Control Consortium Genome-wide association study of 14,000 cases of seven common diseases and 3,000 shared controls. <i>Nature</i> 447, 661-678 (2007)                                                                                                                                 |
| VIS          | VIS and KORCULA (EUROSPAN)                                                                             | Population-based             | White European | 983                   | 0.98       | 1) Gender mismatch<br>2) Genetic outliers                                                                                                                 | 795                     | measured                         | [PMID: 18327257] Vitart, V., Rudan, I., Hayward, C., Gray, N.K., Floyd, J., Palmer, C.N., Knott, S.A., Kolcic, I., Polasek, O., Graessler, J., et al. (2008) SLC2A9 is a newly identified urate transporter influencing serum urate concentration, urate excretion and gout. <i>Nature Genetics</i> , 40, 437-442.              |

Supplementary Table 2. Study design, number of individuals, and sample quality control for studies in stage 1, stage 2, or ancillary analyses

| Study                       |                                                | Study design     | Ethnicity               | Total sample size (N) | Sample QC  |                                                                                                                                                                                                                                                                                                          | Samples in analyses (N) | Anthropometric assessment method | References                                                                                                                                                                                                                                                                                                                                                                                                                                                                                                                                                                                                                                                                                                                                                                                                             |
|-----------------------------|------------------------------------------------|------------------|-------------------------|-----------------------|------------|----------------------------------------------------------------------------------------------------------------------------------------------------------------------------------------------------------------------------------------------------------------------------------------------------------|-------------------------|----------------------------------|------------------------------------------------------------------------------------------------------------------------------------------------------------------------------------------------------------------------------------------------------------------------------------------------------------------------------------------------------------------------------------------------------------------------------------------------------------------------------------------------------------------------------------------------------------------------------------------------------------------------------------------------------------------------------------------------------------------------------------------------------------------------------------------------------------------------|
| Short name                  | Full name                                      |                  |                         |                       | Call rate* | Other exclusions                                                                                                                                                                                                                                                                                         |                         |                                  |                                                                                                                                                                                                                                                                                                                                                                                                                                                                                                                                                                                                                                                                                                                                                                                                                        |
| WGHS                        | Women's Genome Health Study                    | Cohort           | European                | 23294                 | ≥ 98%      | 1) self-reported European ancestry confirmed by identity-by-state analysis using ancestry informative SNPs in PLINK.                                                                                                                                                                                     | 23294                   | self-report                      | <b>[PMID: 18070814]</b> Ridker PM, Chasman DI, Zee RY, Parker A, Rose L, Cook NR, Buring JE; Women's Genome Health Study Working Group. Rationale, design, and methodology of the Women's Genome Health Study: a genome-wide association study of more than 25,000 initially healthy american women. Clin Chem. 2008 Feb;54(2):249-55                                                                                                                                                                                                                                                                                                                                                                                                                                                                                  |
| YFS                         | The Cardiovascular Risk in Young Finns Study   | Population-based | White European: Finnish | 2556                  | ≥ 95%      | 1) SNP clustering probability for each genotype > 95%<br>2) Call rate > 95% both individuals and markers<br>3) MAF > 1%<br>4) HWE p > 1*10 <sup>-6</sup><br>5) heterozygosity, gender check and relatedness checks have been performed and any discrepancies have been removed.<br>6) Missing phenotype. | 2443                    | measured                         | <b>[PMID: 18263651]</b> Raitakari OT, Juonala M, Rönnemaa T, Keltikangas-Järvinen L, Räsänen L, Pietikäinen M, Hutri-Kähönen N, Taittonen L, Jokinen E, Marniemi J, Jula A, Telama R, Kähönen M, Lehtimäki T, Akerblom HK, Viikari JS. Cohort profile: the cardiovascular risk in Young Finns Study. Int J Epidemiol. 2008 Dec;37(6):1220-6.                                                                                                                                                                                                                                                                                                                                                                                                                                                                           |
| <b>Stage 2 - In silico:</b> |                                                |                  |                         |                       |            |                                                                                                                                                                                                                                                                                                          |                         |                                  |                                                                                                                                                                                                                                                                                                                                                                                                                                                                                                                                                                                                                                                                                                                                                                                                                        |
| B58C-REPL                   | British 1958 birth cohort (replication subset) | Population-based | White European          | 2422                  | ≥ 98%      | 1) contamination;<br>2) non-European identity;<br>3) Missing or invalid height, weight, waist or hip.                                                                                                                                                                                                    | 2422                    | measured                         | <b>[PMID 17255346]</b> Strachan DP, Rudnicka AR, Power C, Shepherd P, Fuller E, Davis A, Gibb I, Kumari M, Rumley A, Macfarlane GJ, Rahi J, Rodgers B, Stansfeld S. Lifecourse influences on health among British adults: effects of region of residence in childhood and adulthood. Int J Epidemiol 2007;36:522-531 . <b>[PMID 19430480]</b> Barrett JC, Clayton DG, Concannon P, Akolkar B, Cooper JD, Erlich HA, Julier C, Morahan G, Nerup J, Nierras C, Plagnol V, Pociot F, Schuilenburg H, Smyth DJ, Stevens H, Todd JA, Walker NM, Rich SS; The Type 1 Diabetes Genetics Consortium. Genome-wide association study and meta-analysis find that over 40 loci affect risk of type 1 diabetes. Nat Genet 2009 May 10. <b>[PMID: 15486340]</b> James AL et al. Am J Respir Crit Care Med Vol 171 pp 109-114 (2005) |
| BHS                         | Busselton Health Study                         | Population-based | White European          | 1281                  | ≥ 97%      | 1) ethnic outliers;<br>2) related individuals and duplicates.                                                                                                                                                                                                                                            | 1206                    | measured                         |                                                                                                                                                                                                                                                                                                                                                                                                                                                                                                                                                                                                                                                                                                                                                                                                                        |

Supplementary Table 2. Study design, number of individuals, and sample quality control for studies in stage 1, stage 2, or ancillary analyses

| Study               |            | Study design     | Ethnicity      | Total sample size (N) | Sample QC  |                                                                                      | Samples in analyses (N) | Anthropometric assessment method | References                                                                                                                                                                                                                                                                                                                                                                                                                                                                                                                                                                                                                                                                                                                                                                                                                                                                                                                                                                                                        |
|---------------------|------------|------------------|----------------|-----------------------|------------|--------------------------------------------------------------------------------------|-------------------------|----------------------------------|-------------------------------------------------------------------------------------------------------------------------------------------------------------------------------------------------------------------------------------------------------------------------------------------------------------------------------------------------------------------------------------------------------------------------------------------------------------------------------------------------------------------------------------------------------------------------------------------------------------------------------------------------------------------------------------------------------------------------------------------------------------------------------------------------------------------------------------------------------------------------------------------------------------------------------------------------------------------------------------------------------------------|
| Short name          | Full name  |                  |                |                       | Call rate* | Other exclusions                                                                     |                         |                                  |                                                                                                                                                                                                                                                                                                                                                                                                                                                                                                                                                                                                                                                                                                                                                                                                                                                                                                                                                                                                                   |
| HYPERGENES controls | Hypergenes | Case-control     | White European | 1934                  | >90%       | 1) ethnic outliers<br>2) Missing body weight and height.                             | 1934                    | measured                         | <b>[PMID: 22184326]</b> Salvi E, Kotalik Z, Glorioso N, Benaglio P, Frau F, Kuznetsova T, Arima H, Hoggart C, Tichet J, Nikitin YP, Conti C, Seidlerova J, Tikhonoff V, Stolarz-Skrzypek K, Johnson T, Devos N, Zagato L, Guarrera S, Zaninello R, Calabria A, Stancanelli B, Troffa C, Thijs L, Rizzi F, Simonova G, Lupoli S, Argiolas G, Braga D, D'Alessio MC, Ortu MF, Ricceri F, Mercurio M, Descombes P, Marconi M, Chalmers J, Harrap S, Filipovsky J, Bochud M, Iacoviello L, Ellis J, Stanton AV, Laan M, Padmanabhan S, Dominiczak AF, Samani NJ, Melander O, Jeunemaitre X, Manunta P, Shabo A, Vineis P, Cappuccio FP, Caulfield MJ, Matullo G, Rivolta C, Munroe PB, Barlassina C, Staessen JA, Beckmann JS, Cusi D. Genome-wide association study using a high-density single nucleotide polymorphism array and case-control design identifies a novel essential hypertension susceptibility locus in the promoter region of endothelial NO synthase. <i>Hypertension</i> . 2012 Feb;59(2):248-55. |
| HYPERGENES Cases    | Hypergenes | Case-control     | White European | 2124                  | >90%       | 1) ethnic outliers<br>2) Missing body weight and height.                             | 2124                    | measured                         | <b>[PMID: 22184326]</b> Salvi E, Kotalik Z, Glorioso N, Benaglio P, Frau F, Kuznetsova T, Arima H, Hoggart C, Tichet J, Nikitin YP, Conti C, Seidlerova J, Tikhonoff V, Stolarz-Skrzypek K, Johnson T, Devos N, Zagato L, Guarrera S, Zaninello R, Calabria A, Stancanelli B, Troffa C, Thijs L, Rizzi F, Simonova G, Lupoli S, Argiolas G, Braga D, D'Alessio MC, Ortu MF, Ricceri F, Mercurio M, Descombes P, Marconi M, Chalmers J, Harrap S, Filipovsky J, Bochud M, Iacoviello L, Ellis J, Stanton AV, Laan M, Padmanabhan S, Dominiczak AF, Samani NJ, Melander O, Jeunemaitre X, Manunta P, Shabo A, Vineis P, Cappuccio FP, Caulfield MJ, Matullo G, Rivolta C, Munroe PB, Barlassina C, Staessen JA, Beckmann JS, Cusi D. Genome-wide association study using a high-density single nucleotide polymorphism array and case-control design identifies a novel essential hypertension susceptibility locus in the promoter region of endothelial NO synthase. <i>Hypertension</i> . 2012 Feb;59(2):248-55. |
| LifeLines           | LifeLines  | Population-based | White European | 9480                  | ≥ 95%      | 1) non-Caucasian (Principle Components Analysis);<br>2) related individuals (pi-hat) | 8116                    | measured                         | <b>[PMID:18075776]</b> Stolk, R.P. Universal risk factors for multifactorial diseases: LifeLines: a three-generation population-based study. <i>Eur J Epidemiol</i> . 23(1):67-74 (2008)                                                                                                                                                                                                                                                                                                                                                                                                                                                                                                                                                                                                                                                                                                                                                                                                                          |

**Supplementary Table 2. Study design, number of individuals, and sample quality control for studies in stage 1, stage 2, or ancillary analyses**

| Study          |                                                                | Study design                  | Ethnicity              | Total sample size (N) | Sample QC  |                                                                                                                                                                                                                              | Samples in analyses (N) | Anthropometric assessment method | References                                                                                                                                                                                                                                                                                                                                                                                                                                                                                                                                                                                 |
|----------------|----------------------------------------------------------------|-------------------------------|------------------------|-----------------------|------------|------------------------------------------------------------------------------------------------------------------------------------------------------------------------------------------------------------------------------|-------------------------|----------------------------------|--------------------------------------------------------------------------------------------------------------------------------------------------------------------------------------------------------------------------------------------------------------------------------------------------------------------------------------------------------------------------------------------------------------------------------------------------------------------------------------------------------------------------------------------------------------------------------------------|
| Short name     | Full name                                                      |                               |                        |                       | Call rate* | Other exclusions                                                                                                                                                                                                             |                         |                                  |                                                                                                                                                                                                                                                                                                                                                                                                                                                                                                                                                                                            |
| PLCO2 controls | Prostate, Lung, Colorectal, and Ovarian Cancer Screening Trial | Population-based case-control | Non-Hispanic Caucasian | 1216                  | >98%       | > 0.4); 3) unexpected duplicates; 4) gender mismatch 5) missing phenotype<br>1) sex discordance with genetic data; 2) heterozygosity; 3) ancestry outliers; 4) related individuals and duplicates; 5) missing phenotype data | 1193                    | self-report                      | <b>[PMID: 21490707]</b> Cornelis MC, et al. Genome-wide meta-analysis identifies regions on 7p21 (AHR) and 15q24 (CYP1A2) as determinants of habitual caffeine consumption. <i>PLoS Genet.</i> 2011 Apr;7(4):e1002033.                                                                                                                                                                                                                                                                                                                                                                     |
| PLCO2 cases    | Prostate, Lung, Colorectal, and Ovarian Cancer Screening Trial | Population-based case-control | Non-Hispanic Caucasian | 3003                  | >98%       | 1) sex discordance with genetic data; 2) heterozygosity; 3) ancestry outliers; 4) related individuals and duplicates; 5) missing phenotype data                                                                              | 2976                    | self-report                      | <b>[PMID: 21490707]</b> Cornelis MC, et al. Genome-wide meta-analysis identifies regions on 7p21 (AHR) and 15q24 (CYP1A2) as determinants of habitual caffeine consumption. <i>PLoS Genet.</i> 2011 Apr;7(4):e1002033.                                                                                                                                                                                                                                                                                                                                                                     |
| PREVEND        | Prevention of Renal and Vascular Endstage Disease              | Population-based              | White European         | 3920                  | ≥95%       | 1) ethnic outliers; 2) related individuals and duplicates; 3) missing phenotype;                                                                                                                                             | 3622                    | measured                         | <b>[PMID: 11004219]</b> Pinto-Sietsema SJ, et al. Urinary albumin excretion is associated with renal function abnormalities in a nondiabetic population. <i>J Am Soc Nephrol</i> 2000;11:1882-8.                                                                                                                                                                                                                                                                                                                                                                                           |
| QIMR           | Twin study at Queensland Institute of Medical Research         | Population-based              | White European         | 11930                 | ≥ 95%      | 1) age < 18; 2) ethnic outliers; 3) related individuals and duplicates; 4) Missing body weight and height.                                                                                                                   | 3953                    | measured or self-reported        | <b>[PMID: 19896111]</b> Medland, 2009 Common Variants in the Trichohyalin Gene Are Associated with Straight Hair in Europeans.                                                                                                                                                                                                                                                                                                                                                                                                                                                             |
| RS2            | Rotterdam Study - II                                           | Population-based              | White European         | 3011                  | ≥ 97.5%    | 1) gender mismatch with typed X-linked markers; 2) excess autosomal heterozygosity (F<0.055); 3) duplicates and/or 1st degree relatives using IBD PiHAT >40% from PLINK; 4) ethnic outliers IBS distances >                  | 1911                    | measured                         | <b>[PMID: 11753597]</b> {Visscher, 2001 A comparison of body mass index, waist-hip ratio and waist circumference as predictors of all-cause mortality among the elderly: the Rotterdam study};<br><b>[PMID:19700477]</b> {Estrada, 2009 GRIMP: a web- and grid-based tool for high-speed analysis of large-scale genome-wide association using imputed data};<br><b>[PMID:21877163]</b> {Hofman, 2011 The Rotterdam Study: 2012 objectives and design update};<br><b>[PMID:1833235]</b> {Hofman, 1991 Determinants of disease and disability in the elderly: the Rotterdam Elderly Study}; |



Supplementary Table 2. Study design, number of individuals, and sample quality control for studies in stage 1, stage 2, or ancillary analyses

| Study      |                                               | Study design     | Ethnicity         | Total sample size (N) | Sample QC  |                                                                                                                                                                                                                                                                                                   | Samples in analyses (N) | Anthropometric assessment method | References                                                                                                                                                                                                                                                                                                                                                                                                                                                                                                                                                                                 |
|------------|-----------------------------------------------|------------------|-------------------|-----------------------|------------|---------------------------------------------------------------------------------------------------------------------------------------------------------------------------------------------------------------------------------------------------------------------------------------------------|-------------------------|----------------------------------|--------------------------------------------------------------------------------------------------------------------------------------------------------------------------------------------------------------------------------------------------------------------------------------------------------------------------------------------------------------------------------------------------------------------------------------------------------------------------------------------------------------------------------------------------------------------------------------------|
| Short name | Full name                                     |                  |                   |                       | Call rate* | Other exclusions                                                                                                                                                                                                                                                                                  |                         |                                  |                                                                                                                                                                                                                                                                                                                                                                                                                                                                                                                                                                                            |
|            |                                               |                  |                   |                       |            | 4SD mean<br>HaMAP CEU cluster from PLINK;<br>5) Missing body weight and height.                                                                                                                                                                                                                   |                         |                                  |                                                                                                                                                                                                                                                                                                                                                                                                                                                                                                                                                                                            |
| RS3        | Rotterdam Study - III                         | Population-based | White European    | 3932                  | ≥ 97.5%    | 1) gender mismatch with typed X-linked markers;<br>2) excess autosomal heterozygosity (F<0.055);<br>3) duplicates and/or 1st degree relatives using IBD PiHAT >40% from PLINK;<br>4) ethnic outliers IBS distances > 4SD mean HaMAP CEU cluster from PLINK;<br>5) Missing body weight and height. | 2006                    | measured                         | <b>[PMID: 11753597]</b> {Visscher, 2001 A comparison of body mass index, waist-hip ratio and waist circumference as predictors of all-cause mortality among the elderly: the Rotterdam study};<br><b>[PMID:19700477]</b> {Estrada, 2009 GRIMP: a web- and grid-based tool for high-speed analysis of large-scale genome-wide association using imputed data};<br><b>[PMID:19728115]</b> {Hofman, 2009 The Rotterdam Study: 2010 objectives and design update};<br><b>[PMID:1833235]</b> {Hofman, 1991 Determinants of disease and disability in the elderly: the Rotterdam Elderly Study}; |
| TRAILS     | TRacking Adolescents' Individual Lives Survey | Population-based | Caucasian (Dutch) | 1455                  | >95%       | 1) heterozygosity >3SD from mean;<br>2) duplicate and MZ samples;<br>3) sex mismatches;<br>4) non-caucasians;<br>5) missing phenotype data                                                                                                                                                        | 1141                    | measured                         | <b>[PMID: 18263649]</b> Huisman, M. et al. Cohort profile: the Dutch 'TRacking Adolescents' Individual Lives' Survey'; TRAILS. Int J Epidemiol. 2008 Dec;37(6):1227-35.                                                                                                                                                                                                                                                                                                                                                                                                                    |
| TWINGENE   | TWINGENE                                      | Population-based | White European    | 9836                  | ≥ 97%      | 1) Heterozygosity, (F-mean(F))/sd(Z) ≥ 5<br>2) Sex-check based on the heterozygosity rates on the X-chromosome<br>3) Missing all phenotypes                                                                                                                                                       | 9740                    | measured                         | <b>[PMID: 8981957]</b> Hong Y, Pedersen NL, Brismar K, de Faire U. Genetic and environmental architecture of the features of the insulin-resistance syndrome. The American Journal of Human Genetics 1997 Jan;60(1):143-52.                                                                                                                                                                                                                                                                                                                                                                |

Supplementary Table 2. Study design, number of individuals, and sample quality control for studies in stage 1, stage 2, or ancillary analyses

| Study                                        |                                                                                                                                      | Study design                                                                                                                                                                                                         | Ethnicity      | Total sample size (N) | Sample QC  |                                                                                                             | Samples in analyses (N) | Anthropometric assessment method | References                                                                                                                                                                                                                                                                                                                                                                                                                                                                                                                                                                                                                                                                                                                                                                                                                                                                                                                                                                                                                                                                     |
|----------------------------------------------|--------------------------------------------------------------------------------------------------------------------------------------|----------------------------------------------------------------------------------------------------------------------------------------------------------------------------------------------------------------------|----------------|-----------------------|------------|-------------------------------------------------------------------------------------------------------------|-------------------------|----------------------------------|--------------------------------------------------------------------------------------------------------------------------------------------------------------------------------------------------------------------------------------------------------------------------------------------------------------------------------------------------------------------------------------------------------------------------------------------------------------------------------------------------------------------------------------------------------------------------------------------------------------------------------------------------------------------------------------------------------------------------------------------------------------------------------------------------------------------------------------------------------------------------------------------------------------------------------------------------------------------------------------------------------------------------------------------------------------------------------|
| Short name                                   | Full name                                                                                                                            |                                                                                                                                                                                                                      |                |                       | Call rate* | Other exclusions                                                                                            |                         |                                  |                                                                                                                                                                                                                                                                                                                                                                                                                                                                                                                                                                                                                                                                                                                                                                                                                                                                                                                                                                                                                                                                                |
| UKBS2                                        | Wellcome Trust Common Controls Consortium - Panel 2                                                                                  | Population-based                                                                                                                                                                                                     | White European | 1338                  | ≥ 95%      | 1) missing body weight & height                                                                             | 1332                    | questionnaire                    | <b>[PMID: 17554300]</b> Committee., W.T.C.C.C., Burton, P.R., Clayton, D.G., Cardon, L.R., Craddock, N., Deloukas, P., Duncanson, A., Kwiatkowski, D.P., McCarthy, M.I., Ouwehand, W.H., Samani, N.J., Todd, J. & Donnelly, P.C. Genome-wide association study of 14,000 cases of seven common diseases and 3,000 shared controls. <i>Nature</i> , <b>447</b> , 661-678 (2007).                                                                                                                                                                                                                                                                                                                                                                                                                                                                                                                                                                                                                                                                                                |
| <b>Stage 2 - Metabochip:</b>                 |                                                                                                                                      |                                                                                                                                                                                                                      |                |                       |            |                                                                                                             |                         |                                  |                                                                                                                                                                                                                                                                                                                                                                                                                                                                                                                                                                                                                                                                                                                                                                                                                                                                                                                                                                                                                                                                                |
| AMC-PAS                                      | Academic Medical Centre Amsterdam Premature Atherosclerosis Study                                                                    | CAD cases                                                                                                                                                                                                            | White European | 490                   | 0.97       | 1) heterozygosity;<br>2) ethnic outliers;<br>3) duplicate;<br>4) missing phenotypes;<br>5) call rate < 0.95 | 490                     | measured                         | <b>[PMID: 19164808]</b> Coronary Artery Disease Consortium, Samani NJ. et al. Large scale association analysis of novel genetic loci for coronary artery disease. <i>Arterioscler Thromb Vasc Biol.</i> 2009 May;29(5):774-80.                                                                                                                                                                                                                                                                                                                                                                                                                                                                                                                                                                                                                                                                                                                                                                                                                                                 |
| CARDIOGENICS controls                        | CARDIOGENICS                                                                                                                         | CAD controls                                                                                                                                                                                                         | European       | 375                   | 0.98       | 1) heterozygosity;<br>2) ethnic outliers;<br>3) duplicate;<br>4) missing phenotypes;<br>5) call rate < 0.95 | 375                     | measured                         | <b>[PMID: 17634449]</b> Samani NJ. et al. Genomewide association analysis of coronary artery disease. <i>N Engl J Med.</i> 2007 Aug 2;357(5):443-53.                                                                                                                                                                                                                                                                                                                                                                                                                                                                                                                                                                                                                                                                                                                                                                                                                                                                                                                           |
| CARDIOGENICS cases                           | CARDIOGENICS                                                                                                                         | CAD cases                                                                                                                                                                                                            | European       | 379                   | 0.98       | 1) heterozygosity;<br>2) ethnic outliers;<br>3) duplicate;<br>4) missing phenotypes;<br>5) call rate < 0.95 | 379                     | measured                         | <b>[PMID: 17634449]</b> Samani NJ. et al. Genomewide association analysis of coronary artery disease. <i>N Engl J Med.</i> 2007 Aug 2;357(5):443-53.                                                                                                                                                                                                                                                                                                                                                                                                                                                                                                                                                                                                                                                                                                                                                                                                                                                                                                                           |
| D2D2007.DPS.DRSEXTRA.FUSION2.METSIM controls | FIN-D2D 2007. Diabetes Prevention Study, The Dose Responses to Exercise Training Study, FUSION stage2, and METabolic Syndrome In Men | FIN-D2D 2007 and DR's EXTRA are population-based. DPS is a clinical prevention trial. For FUSION stage 2 and METSIM, samples genotyped followed a case/control design. Cases were analyzed separately from controls. | White European | 6643                  | 0.95       | 1) Gender discrepant;<br>2) unexpected duplicate;<br>3) missing all phenotype;<br>4) first-degree related   | 6108                    | measured                         | (FIN-D2D 2007) <b>[PMID: 20459722]</b> Kotronen A, Yki-Järvinen H, Männistö S, Saarikoski L, Korpi-Hyövälti E, Oksa H, Saltevo J, Saaristo T, Sundvall J, Tuomilehto J, Peltonen M. Non-alcoholic and alcoholic Fatty Liver Disease – two Diseases of Affluence associated with the Metabolic Syndrome and Type 2 Diabetes: the FIN-D2D Survey. <i>BMC Public Health</i> 2010; 10: 237. (DPS) <b>[PMID: 11333990]</b> Tuomilehto J, Lindström J, Eriksson JG, Valle TT, Hämäläinen H, Ilanne-Parikka P, Keinänen-Kiukaanniemi S, Laakso M, Louheranta A, Rastas M, Salminen V, Uusitupa M, for the Finnish Diabetes Prevention Study Group. Prevention of Type 2 Diabetes Mellitus by Changes in Lifestyle among Subjects with Impaired Glucose Tolerance. <i>N Engl J Med</i> 2001; 344: 1343-1350. (DR'S EXTRA) <b>[PMID: 21186108]</b> Diet, fitness and metabolic syndrome - The DR's EXTRA Study. Kouki R, Schwab U, Lakka TA, Hassinen M, Savonen K, Komulainen P, Krachler B, Rauramaa R. <i>Nutr Metab Cardiovasc Dis.</i> 2010 Dec 24. (FUSION stage 2) <b>[PMID:</b> |

Supplementary Table 2. Study design, number of individuals, and sample quality control for studies in stage 1, stage 2, or ancillary analyses

| Study                                     |                                                                                                                                     | Study design                                                                                                                                                                                                         | Ethnicity      | Total sample size (N) | Sample QC  |                                                                                                           | Samples in analyses (N) | Anthropometric assessment method | References                                                                                                                                                                                                                                                                                                                                                                                                                                                                                                                                                                                                                                                                                                                                                                                                                                                                                                                                                                                                                                                                                                                                                                                                                                                                                                                                                                                                                                                                                                                                                                                                                                                                                                                                                                                                                                                                                                                                                                                                                                                                                                                                                                                                                                                                                                                                   |
|-------------------------------------------|-------------------------------------------------------------------------------------------------------------------------------------|----------------------------------------------------------------------------------------------------------------------------------------------------------------------------------------------------------------------|----------------|-----------------------|------------|-----------------------------------------------------------------------------------------------------------|-------------------------|----------------------------------|----------------------------------------------------------------------------------------------------------------------------------------------------------------------------------------------------------------------------------------------------------------------------------------------------------------------------------------------------------------------------------------------------------------------------------------------------------------------------------------------------------------------------------------------------------------------------------------------------------------------------------------------------------------------------------------------------------------------------------------------------------------------------------------------------------------------------------------------------------------------------------------------------------------------------------------------------------------------------------------------------------------------------------------------------------------------------------------------------------------------------------------------------------------------------------------------------------------------------------------------------------------------------------------------------------------------------------------------------------------------------------------------------------------------------------------------------------------------------------------------------------------------------------------------------------------------------------------------------------------------------------------------------------------------------------------------------------------------------------------------------------------------------------------------------------------------------------------------------------------------------------------------------------------------------------------------------------------------------------------------------------------------------------------------------------------------------------------------------------------------------------------------------------------------------------------------------------------------------------------------------------------------------------------------------------------------------------------------|
| Short name                                | Full name                                                                                                                           |                                                                                                                                                                                                                      |                |                       | Call rate* | Other exclusions                                                                                          |                         |                                  |                                                                                                                                                                                                                                                                                                                                                                                                                                                                                                                                                                                                                                                                                                                                                                                                                                                                                                                                                                                                                                                                                                                                                                                                                                                                                                                                                                                                                                                                                                                                                                                                                                                                                                                                                                                                                                                                                                                                                                                                                                                                                                                                                                                                                                                                                                                                              |
| D2D2007.DPS.DRSEXTRA.FUSION2.METSIM cases | FIN-D2D 2007. Diabetes Prevention Study, The Dose Responses to Exercise Training Study, FUSIONstage2, and METabolic Syndrome In Men | FIN-D2D 2007 and DR's EXTRA are population-based. DPS is a clinical prevention trial. For FUSION stage 2 and METSIM, samples genotyped followed a case/control design. Cases were analyzed separately from controls. | White European | 2923                  | 0.95       | 1) Gender discrepant;<br>2) unexpected duplicate;<br>3) missing all phenotype;<br>4) first-degree related | 2754                    | measured                         | <b>17463248</b> ] Scott, L.J., Mohlke, K.L., Bonnycastle, L.L., Willer, C.J., Li, Y., Duren, W.L., Erdos, M.R., Stringham, H.M., Chines, P.S., Jackson, A.U., Prokunina-Olsson L., Ding, C.J., Swift, A.J., Narisu, N., Hu, T., Pruim, R., Xiao, R., Li, X.Y., Conneely, K.N., Riebow, N.L., Sprau, A.G., Tong, M., White, P.P., Hetrick, K.N., Barhnart, M.W., Bark, C.W., Goldstein, J.L., Watkins, L., Xiang, F., Saramies, J., Buchanan, T.A., Watanabe, R.M., Valle, T.T., Kinnunen, L., Abecasis, G.R., Pugh, E.W., Doheny, K.F., Bergman, R.N., Tuomilehto, J., Collins, F.S., Boehnke, M. (2007) A Genome-Wide Association Study of Type 2 Diabetes in Finns Detects Multiple Susceptibility Variants. Science 316:1341-1345. (METSIM) <b>[PMID: 19223598]</b> Stancakova A, Javorsky M, Kuulasmaa T, Haffner SM, Kuusisto J, Laakso M: Changes in insulin sensitivity and insulin release in relation to glycemia and glucose tolerance in 6416 Finnish men. Diabetes 58:1212-1221, 2009. (FIN-D2D 2007) <b>[PMID: 20459722]</b> Kotronen A, Yki-Järvinen H, Männistö S, Saarikoski L, Korpi-Hyövälti E, Oksa H, Saltevo J, Saaristo T, Sundvall J, Tuomilehto J, Peltonen M. Non-alcoholic and alcoholic Fatty Liver Disease – two Diseases of Affluence associated with the Metabolic Syndrome and Type 2 Diabetes: the FIN-D2D Survey. BMC Public Health 2010; 10: 237. (DPS) <b>[PMID: 11333990]</b> Tuomilehto J, Lindström J, Eriksson JG, Valle TT, Hämäläinen H, Ilanne-Parikka P, Keinänen-Kiukkaanniemi S, Laakso M, Louheranta A, Rastas M, Salminen V, Uusitupa M, for the Finnish Diabetes Prevention Study Group. Prevention of Type 2 Diabetes Mellitus by Changes in Lifestyle among Subjects with Impaired Glucose Tolerance. N Engl J Med 2001; 344: 1343-1350. (DR'S EXTRA) <b>[PMID: 21186108]</b> Diet, fitness and metabolic syndrome - The DR's EXTRA Study. Kouki R, Schwab U, Lakka TA, Hassinen M, Savonen K, Komulainen P, Krachler B, Rauramaa R. Nutr Metab Cardiovasc Dis. 2010 Dec 24. (FUSION stage 2) <b>[PMID: 17463248]</b> Scott, L.J., Mohlke, K.L., Bonnycastle, L.L., Willer, C.J., Li, Y., Duren, W.L., Erdos, M.R., Stringham, H.M., Chines, P.S., Jackson, A.U., Prokunina-Olsson L., Ding, C.J., Swift, A.J., Narisu, N., Hu, T., Pruim, R., Xiao, R., Li, X.Y., Conneely, K.N., Riebow, |

Supplementary Table 2. Study design, number of individuals, and sample quality control for studies in stage 1, stage 2, or ancillary analyses

| Study      |                                                                                 | Study design     | Ethnicity      | Total sample size (N) | Sample QC  |                                                                                                      | Samples in analyses (N) | Anthropometric assessment method | References                                                                                                                                                                                                                                                                                                                                                                                                                                                                                                                                                                                                                                                                                                                                                                 |
|------------|---------------------------------------------------------------------------------|------------------|----------------|-----------------------|------------|------------------------------------------------------------------------------------------------------|-------------------------|----------------------------------|----------------------------------------------------------------------------------------------------------------------------------------------------------------------------------------------------------------------------------------------------------------------------------------------------------------------------------------------------------------------------------------------------------------------------------------------------------------------------------------------------------------------------------------------------------------------------------------------------------------------------------------------------------------------------------------------------------------------------------------------------------------------------|
| Short name | Full name                                                                       |                  |                |                       | Call rate* | Other exclusions                                                                                     |                         |                                  |                                                                                                                                                                                                                                                                                                                                                                                                                                                                                                                                                                                                                                                                                                                                                                            |
|            |                                                                                 |                  |                |                       |            |                                                                                                      |                         |                                  | N.L., Sprau, A.G., Tong, M., White, P.P., Hetrick, K.N., Barhnart, M.W., Bark, C.W., Goldstein, J.L., Watkins, L., Xiang, F., Saramies, J., Buchanan, T.A., Watanabe, R.M., Valle, T.T., Kinnunen, L., Abecasis, G.R., Pugh, E.W., Doheny, K.F., Bergman, R.N., Tuomilehto, J., Collins, F.S., Boehnke, M. (2007) A Genome-Wide Association Study of Type 2 Diabetes in Finns Detects Multiple Susceptibility Variants. <i>Science</i> 316:1341-1345. (METSIM) [PMID: 19223598]                                                                                                                                                                                                                                                                                            |
| DILGOM     | Dietary, life style, and genetic determinants of obesity and metabolic syndrome | Population-based | White European | 3997                  | ≥ 95%      | 1) heterozygosity <23.9% or >27.6%;<br>2) ethnic outliers;<br>3) related individuals and duplicates. | 3938                    | measured                         | [PMID: 20138944] Kontinen H, Männistö S, Sarlio-Lähteenkorva S, Silventoinen K, Haukkala A. Emotional eating, depressive symptoms and self-reported food consumption. A population-based study. <i>Appetite</i> . 2010 Jun;54(3):473-9. [PMID: 20844574] Inouye M, Silander K, Hamalainen E, Salomaa V, Harald K, Jousilahti P, Männistö S, Eriksson JG, Saarela J, Ripatti S, Perola M, van Ommen GJ, Taskinen MR, Palotie A, Dermitzakis ET, Peltonen L. An immune response network associated with blood lipid levels. <i>PLoS Genet</i> . 2010 Sep 9;6(9). Peltonen, M., Harald, K., Männistö, S., Saarikoski, L., Peltomäki, P., Lund, L., et al. (2008). The National FINRISK 2007 Study. Helsinki: Publications of the National Public Health Institute, B 34/2008. |

Supplementary Table 2. Study design, number of individuals, and sample quality control for studies in stage 1, stage 2, or ancillary analyses

| Study            |                  | Study design     | Ethnicity      | Total sample size (N) | Sample QC                                                                                        |                                                                                                            | Samples in analyses (N) | Anthropometric assessment method | References                                                                                                                                                                                                                                                                                                                                                                                                                                                                                                                                                                                                                                                                                                                                                                                                                                                                                                                                                                                                                                        |
|------------------|------------------|------------------|----------------|-----------------------|--------------------------------------------------------------------------------------------------|------------------------------------------------------------------------------------------------------------|-------------------------|----------------------------------|---------------------------------------------------------------------------------------------------------------------------------------------------------------------------------------------------------------------------------------------------------------------------------------------------------------------------------------------------------------------------------------------------------------------------------------------------------------------------------------------------------------------------------------------------------------------------------------------------------------------------------------------------------------------------------------------------------------------------------------------------------------------------------------------------------------------------------------------------------------------------------------------------------------------------------------------------------------------------------------------------------------------------------------------------|
| Short name       | Full name        |                  |                |                       | Call rate*                                                                                       | Other exclusions                                                                                           |                         |                                  |                                                                                                                                                                                                                                                                                                                                                                                                                                                                                                                                                                                                                                                                                                                                                                                                                                                                                                                                                                                                                                                   |
| GoDARTS controls | GoDARTS controls | Population-based | White European | 3962                  | For SNPs with MAF $\geq 5\%$ : $\geq 95\%$<br>For SNPs with $\geq 1\%$ MAF $< 5\%$ : $\geq 99\%$ | MAF $\geq 1\%$ ; genotype clustering, call rate, HWE, MI of alleles, concordance rate, correct SNP mapping | 3709                    | measured                         | <b>[PMID: 17429603]</b> Kimber CH, Doney AS, Pearson ER, McCarthy MI, Hattersley AT, Leese GP, Morris AD, Palmer CN: TCF7L2 in the Go-DARTS study: evidence for a gene dose effect on both diabetes susceptibility and control of glucose levels. <i>Diabetologia</i> 2007, 50:1186-1191. <b>[PMID:21186350]</b> Zhou K, Bellenguez C, Spencer CC, Bennett AJ, Coleman RL, Tavendale R, Hawley SA, Donnelly LA, Schofield C, Groves CJ, Burch L, Carr F, Strange A, Freeman C, Blackwell JM, Bramon E, Brown MA, Casas JP, Corvin A, Craddock N, Deloukas P, Dronov S, Duncanson A, Edkins S, Gray E, Hunt S, Jankowski J, Langford C, Markus HS, Mathew CG, Plomin R, Rautanen A, Sawcer SJ, Samani NJ, Trembath R, Viswanathan AC, Wood NW, Harries LW, Hattersley AT, Doney AS, Colhoun H, Morris AD, Sutherland C, Hardie DG, Peltonen L, McCarthy MI, Holman RR, Palmer CN, Donnelly P, Pearson ER: Common variants near ATM are associated with glycemic response to metformin in type 2 diabetes. <i>Nature genetics</i> 2011, 43:117-120. |
| GoDARTS cases    | GoDARTS cases    | Population-based | White European | 3582                  | For SNPs with MAF $\geq 5\%$ : $\geq 95\%$<br>For SNPs with $\geq 1\%$ MAF $< 5\%$ : $\geq 99\%$ | MAF $\geq 1\%$ ; genotype clustering, call rate, HWE, MI of alleles, concordance rate, correct SNP mapping | 3313                    | measured                         | <b>[PMID: 17429603]</b> Kimber CH, Doney AS, Pearson ER, McCarthy MI, Hattersley AT, Leese GP, Morris AD, Palmer CN: TCF7L2 in the Go-DARTS study: evidence for a gene dose effect on both diabetes susceptibility and control of glucose levels. <i>Diabetologia</i> 2007, 50:1186-1191. <b>[PMID:21186350]</b> Zhou K, Bellenguez C, Spencer CC, Bennett AJ, Coleman RL, Tavendale R, Hawley SA, Donnelly LA, Schofield C, Groves CJ, Burch L, Carr F, Strange A, Freeman C, Blackwell JM, Bramon E, Brown MA, Casas JP, Corvin A, Craddock N, Deloukas P, Dronov S, Duncanson A, Edkins S, Gray E, Hunt S, Jankowski J, Langford C, Markus HS, Mathew CG, Plomin R, Rautanen A, Sawcer SJ, Samani NJ, Trembath R, Viswanathan AC, Wood NW, Harries LW, Hattersley AT, Doney AS, Colhoun H, Morris AD, Sutherland C, Hardie DG, Peltonen L, McCarthy MI, Holman RR, Palmer CN, Donnelly P, Pearson ER: Common variants near ATM are associated with glycemic response to metformin in type 2 diabetes. <i>Nature genetics</i> 2011, 43:117-120. |

**Supplementary Table 2. Study design, number of individuals, and sample quality control for studies in stage 1, stage 2, or ancillary analyses**

| Study          |                                                                                       | Study design     | Ethnicity      | Total sample size (N) | Sample QC  |                                                                                                   | Samples in analyses (N) | Anthropometric assessment method | References                                                                                                                                                                                                                                                                                                                                |
|----------------|---------------------------------------------------------------------------------------|------------------|----------------|-----------------------|------------|---------------------------------------------------------------------------------------------------|-------------------------|----------------------------------|-------------------------------------------------------------------------------------------------------------------------------------------------------------------------------------------------------------------------------------------------------------------------------------------------------------------------------------------|
| Short name     | Full name                                                                             |                  |                |                       | Call rate* | Other exclusions                                                                                  |                         |                                  |                                                                                                                                                                                                                                                                                                                                           |
| EGCUT controls | Estonian Genome Center of University of Tartu                                         | Case-control     | White European | 940                   | ≥ 95%      | 1) Ambiguous sex;<br>2) cryptic relatedness;<br>3) missing phenotype;<br>4) non-European descent  | 940                     | measured                         | [PMID: 19424496] Nelis M, Esko T, Magi R, Zimprich F, Zimprich A, et al. (2009) Genetic Structure of Europeans: A View from the North-East. PLoS ONE 4(5): e5472.<br>Metspalu A. The Estonian Genome Project. Drug Development Research 62, 97-101 (2004).                                                                                |
| EGCUT CAD      | Estonian Genome Center of University of Tartu                                         | Case-control     | White European | 700                   | ≥ 95%      | 1) Ambiguous sex;<br>2) cryptic relatedness;<br>3) missing phenotype;<br>4) non-European descent  | 700                     | measured                         | [PMID: 19424496] Nelis M, Esko T, Magi R, Zimprich F, Zimprich A, et al. (2009) Genetic Structure of Europeans: A View from the North-East. PLoS ONE 4(5): e5472.<br>Metspalu A. The Estonian Genome Project. Drug Development Research 62, 97-101 (2004).                                                                                |
| EGCUT T2D      | Estonian Genome Center of University of Tartu                                         | Case-control     | White European | 967                   | ≥ 95%      | 1) Ambiguous sex;<br>2) cryptic relatedness;<br>3) missing phenotype;<br>4) non-European descent  | 967                     | measured                         | [PMID: 19424496] Nelis M, Esko T, Magi R, Zimprich F, Zimprich A, et al. (2009) Genetic Structure of Europeans: A View from the North-East. PLoS ONE 4(5): e5472.<br>Metspalu A. The Estonian Genome Project. Drug Development Research 62, 97-101 (2004).                                                                                |
| ELY            | Ely Study                                                                             | Population-based | White European | 1625                  | ≥ 95%      | 1) Missing body weight and height.<br>2) Heterozygosity<br>3) gender check                        | 1600                    | measured                         | [PMID: 17257284] Forouhi NG, et al. Incidence of Type 2 diabetes in England and its association with baseline impaired fasting glucose: the Ely study 1990-2000. Diabet Med. 2007 Feb;24(2):200-7.                                                                                                                                        |
| EPIC Controls  | EPIC (European Prospective Investigation into Cancer) Norfolk Cohort, non-DM controls | Population-based | White European | 978                   | ≥ 95%      | 1) Missing body weight and height, or case-control status<br>2) Heterozygosity<br>3) gender check | 963                     | measured                         | [PMID: 10466767] Day N, Oakes S, Luben R, et al. EPIC-Norfolk: study design and characteristics of the cohort. European Prospective Investigation of Cancer. Br J Cancer 1999, 80:95-103<br>[PMID: 18454148] Loos RJ et al. Common variants near MC4R are associated with fat mass, weight and risk of obesity. Nat Genet 2008, 40:768-75 |
| EPIC Cases     | EPIC (European Prospective Investigation into Cancer) Norfolk Cohort, DM cases        | T2D case series  | White European | 735                   | ≥ 95%      | 1) Missing body weight and height, or case-control status<br>2) Heterozygosity<br>3) gender check | 727                     | measured                         | [PMID: 10466767] Day N, Oakes S, Luben R, et al. EPIC-Norfolk: study design and characteristics of the cohort. European Prospective Investigation of Cancer. Br J Cancer 1999, 80:95-103<br>[PMID: 18454148] Loos RJ et al. Common variants near MC4R are associated with fat mass, weight and risk of obesity. Nat Genet 2008, 40:768-75 |
| FENLAND        | Fenland Study                                                                         | Population-based | White European | 3251                  | ≥ 95%      | 1) Missing body weight and height.<br>2) Heterozygosity<br>3) gender check                        | 3186                    | measured                         | [PMID: 19079261] Willer CJ, Speliotes EK, Loos RJ, et al. Six new loci associated with body mass index highlight a neuronal influence on body weight regulation. Nat Genet 2009, 41:25-34.                                                                                                                                                |

**Supplementary Table 2. Study design, number of individuals, and sample quality control for studies in stage 1, stage 2, or ancillary analyses**

| Study                |                                                                                                                        | Study design                                                                                                                                         | Ethnicity      | Total sample size (N) | Sample QC  |                                                                                                              | Samples in analyses (N) | Anthropometric assessment method | References                                                                                                                                                                                                                                                                                                                                                                                                                                                                                                                                                                                                                   |
|----------------------|------------------------------------------------------------------------------------------------------------------------|------------------------------------------------------------------------------------------------------------------------------------------------------|----------------|-----------------------|------------|--------------------------------------------------------------------------------------------------------------|-------------------------|----------------------------------|------------------------------------------------------------------------------------------------------------------------------------------------------------------------------------------------------------------------------------------------------------------------------------------------------------------------------------------------------------------------------------------------------------------------------------------------------------------------------------------------------------------------------------------------------------------------------------------------------------------------------|
| Short name           | Full name                                                                                                              |                                                                                                                                                      |                |                       | Call rate* | Other exclusions                                                                                             |                         |                                  |                                                                                                                                                                                                                                                                                                                                                                                                                                                                                                                                                                                                                              |
| GLACIER              | Gene x Lifestyle interactions And Complex traits Involved in Elevated disease Risk                                     | Prospective cohort study                                                                                                                             | White European | 6311                  | ≥ 95%      | 1. Missing phenotype<br>2. Duplicates<br>3. Call rate<br>4. Heterozygosity<br>5. Gender fails                | 6047                    | measured                         | <b>[PMID: 19164386]</b> Renström F, Shungin D, Johansson I, the MAGIC investigators, Florez JC, Hallmans G, Hu FB, Franks PW. Genetic predisposition to long-term non-diabetic deteriorations in glucose homeostasis: ten-year follow-up of the GLACIER Study. <i>Diabetes</i> . 60(1): 345-54 2011<br><b>[PMID: 14660243]</b> Renström F, Payne F, Nordström A, Brito EC, Rolandsson O, Hallmans G, Barosso I, Nordström P, Franks PW: the GIANT consortium. Replication and extension of genome-wide association study results for obesity in 4,923 adults from Northern Sweden. <i>Hum Mol Genet</i> . 18(8):1489-96 2009 |
| HNR                  | Heinz Nixdorf Recall Study                                                                                             | Population-based                                                                                                                                     | White European | 4570                  | ≥ 97%      | 1) heterozygosity;<br>2) ethnic outliers;<br>3) related individuals and duplicates;<br>4) missing phenotypes | 4518                    | measured                         | <b>[PMID: 16121757]</b> Stang A. et al. Baseline recruitment and analyses of nonresponse of the Heinz Nixdorf Recall Study: identifiability of phone numbers as the major determinant of response. <i>Eur J Epidemiol</i> . 2005;20(6):489-96. <b>[PMID: 20616309]</b> Pechlivanis S. et al. Coronary artery calcification and its relationship to validated genetic variants for diabetes mellitus assessed in the Heinz Nixdorf recall cohort. <i>Arterioscler Thromb Vasc Biol</i> . 2010 Sep;30(9):1867-72.                                                                                                              |
| HUNT.TROMSO controls | HUNT2 and Tromsø 4                                                                                                     | HUNT2 and Tromsø 4 are population-based studies, but samples genotyped followed a case/control design. Cases were analyzed separately from controls. | White European | 1685                  | 0.95       | 1) Gender discrepant;<br>2) unexpected duplicate;<br>3) missing all phenotypes;<br>4) first-degree related   | 1290                    | measured                         | (HUNT2) Holmen J, Midtjell K, Krüger Ø, Langhammer A, Holmen TL, Bratberg G. The Nord-Trøndelag Health Study 1995-97 (HUNT 2): Objectives, contents, methods and participation. <i>Norsk Epidemiologi</i> 2003; 13:19-32. (Tromsø 4 ) <b>[PMID: 21422063]</b> Jacobsen BK, Eggen AE, Mathiesen EB, Wilsgaard T, Njolstad I. Cohort profile: The Tromsø Study. <i>Int J Epidemiol</i> ; April 21, 2011.                                                                                                                                                                                                                       |
| HUNT.TROMSO cases    | HUNT2 and Tromsø 4                                                                                                     | HUNT2 and Tromsø 4 are population-based studies, but samples genotyped followed a case/control design. Cases were analyzed separately from controls. | White European | 1303                  | 0.95       | 1) Gender discrepant;<br>2) unexpected duplicate;<br>3) missing all phenotypes;<br>4) first-degree related   | 1078                    | measured                         | (HUNT2) Holmen J, Midtjell K, Krüger Ø, Langhammer A, Holmen TL, Bratberg G. The Nord-Trøndelag Health Study 1995-97 (HUNT 2): Objectives, contents, methods and participation. <i>Norsk Epidemiologi</i> 2003; 13:19-32. (Tromsø 4 ) <b>[PMID: 21422063]</b> Jacobsen BK, Eggen AE, Mathiesen EB, Wilsgaard T, Njolstad I. Cohort profile: The Tromsø Study. <i>Int J Epidemiol</i> ; April 21, 2011.                                                                                                                                                                                                                       |
| IMPROVE              | Carotid Intima-Media Thickness and IMT-Progression as predictors of Vascular Events in a high risk European population | Individuals with high CVD risk                                                                                                                       | White European | 3449                  | ≥ 95%      | 1) ambiguous sex;<br>2) cryptic relatedness;<br>3) non-european descent                                      | 3449                    | measured                         | <b>[PMID: 19952003]</b> Baldassarre D. et al. Cross-sectional analysis of baseline data to identify the major determinants of carotid intima-media thickness in a European population: the IMPROVE study. <i>Eur Heart J</i> . 2010 Mar;31(5):614-22.                                                                                                                                                                                                                                                                                                                                                                        |
| KORA S3 METABO       | Cooperative Health Research in the Region of Augsburg                                                                  | Population-based                                                                                                                                     | White European | 1278                  | 0.93       | none                                                                                                         | 1278                    | measured                         | <b>[PMID: 16032514]</b> Wichmann HE et al. KORA-gen--resource for population genetics, controls and a broad spectrum of disease phenotypes. <i>Gesundheitswesen</i> 67                                                                                                                                                                                                                                                                                                                                                                                                                                                       |

**Supplementary Table 2. Study design, number of individuals, and sample quality control for studies in stage 1, stage 2, or ancillary analyses**

| Study           |                                                       | Study design                                       | Ethnicity      | Total sample size (N) | Sample QC  |                                                                                                                                              | Samples in analyses (N) | Anthropometric assessment method | References                                                                                                                                                                                                                                                                                                                                                                                                                                                                                                                                                                                                                                                                                       |
|-----------------|-------------------------------------------------------|----------------------------------------------------|----------------|-----------------------|------------|----------------------------------------------------------------------------------------------------------------------------------------------|-------------------------|----------------------------------|--------------------------------------------------------------------------------------------------------------------------------------------------------------------------------------------------------------------------------------------------------------------------------------------------------------------------------------------------------------------------------------------------------------------------------------------------------------------------------------------------------------------------------------------------------------------------------------------------------------------------------------------------------------------------------------------------|
| Short name      | Full name                                             |                                                    |                |                       | Call rate* | Other exclusions                                                                                                                             |                         |                                  |                                                                                                                                                                                                                                                                                                                                                                                                                                                                                                                                                                                                                                                                                                  |
|                 |                                                       |                                                    |                |                       |            |                                                                                                                                              |                         |                                  | Suppl 1, S26-30 (2005).                                                                                                                                                                                                                                                                                                                                                                                                                                                                                                                                                                                                                                                                          |
| KORA S4 METABO  | Cooperative Health Research in the Region of Augsburg | Population-based                                   | White European | 1222                  | 0.93       | none                                                                                                                                         | 1222                    | measured                         | <b>[PMID: 16032514]</b> Wichmann HE et al. KORA-gen--resource for population genetics, controls and a broad spectrum of disease phenotypes. <i>Gesundheitswesen</i> 67 Suppl 1, S26-30 (2005).                                                                                                                                                                                                                                                                                                                                                                                                                                                                                                   |
| LURIC           | Ludwigshafen Risk and Cardiovascular Health Study     | Case-control                                       | White European | 2929                  | ≥ 95%      | 1) Gender ambiguity; 2) Missing hip and waist measurement; 3) age < 18                                                                       | 2895                    | measured                         | <b>[PMID: 11258203]</b> Winkelmann, BR, Marz, W, Boehm, BO, Zotz, R, Hager, J, Hellstern, P and Senges, J, Rationale and design of the LURIC study--a resource for functional genomics, pharmacogenomics and long-term prognosis of cardiovascular disease, <i>Pharmacogenomics</i> , 2001, 2: S1-73.                                                                                                                                                                                                                                                                                                                                                                                            |
| MORGAM Controls | MONica Risk, Genetics, Archiving and Monograph        | Population-based follow-up cohorts.                | White European | ~2650                 | ≥ 95%      | 1) heterozygosity <18.1% or >20.7%; 2) >10.0% discordance with Sequenom genotypes 3) ethnic outliers; 4) related individuals and duplicates. | 2473                    | measured                         | <b>[PMID: 15561751]</b> Evans A, Salomaa V, Kulathinal S, Asplund K, Cambien F, Ferrario M, Perola M, Peltonen L, Shields D, Tunstall-Pedoe H, Kuulasmaa K, for the MORGAM Project. MORGAM (an international pooling of cardiovascular cohorts). <i>Int J Epidemiol</i> 2005;34:21-27. 2. Tunstall-Pedoe H, editor. Prepared by Tunstall-Pedoe H, Kuulasmaa K, Tolonen H, Davidson M, Mendis S with 64 other contributors for The WHO MONICA Project. MONICA Monograph and Multimedia Sourcebook. Geneva: World Health Organization; 2003. ISBN 92 4 156223 4. Also available from <a href="http://www.ktl.fi/monica/public/monograph.html">http://www.ktl.fi/monica/public/monograph.html</a> . |
| MORGAM Cases    | MONica Risk, Genetics, Archiving and Monograph        | CVD cases from population-based follow-up cohorts. | White European | ~2150                 | ≥ 95%      | 1) heterozygosity <18.1% or >20.7%; 2) >10.0% discordance with Sequenom genotypes 3) ethnic outliers; 4) related individuals and duplicates. | 2052                    | measured                         | <b>[PMID: 15561751]</b> Evans A, Salomaa V, Kulathinal S, Asplund K, Cambien F, Ferrario M, Perola M, Peltonen L, Shields D, Tunstall-Pedoe H, Kuulasmaa K, for the MORGAM Project. MORGAM (an international pooling of cardiovascular cohorts). <i>Int J Epidemiol</i> 2005;34:21-27. 2. Tunstall-Pedoe H, editor. Prepared by Tunstall-Pedoe H, Kuulasmaa K, Tolonen H, Davidson M, Mendis S with 64 other contributors for The WHO MONICA Project. MONICA Monograph and Multimedia Sourcebook. Geneva: World Health Organization; 2003. ISBN 92 4 156223 4. Also available from <a href="http://www.ktl.fi/monica/public/monograph.html">http://www.ktl.fi/monica/public/monograph.html</a> . |
| NSHD            | MRC National Survey of Health & Development           | Birth cohort                                       | White European | 5362                  | ≥ 95%      | 1) Missing body weight and height. 2) Heterozygosity 3) gender check                                                                         | 988                     | measured                         | <b>[PMID: 16204333]</b> Wadsworth M, Kuh D, Richards M, Hardy R. Cohort Profile: The 1946 National Birth Cohort (MRC National Survey of Health and Development). <i>Int J Epidemiol</i> . 35(1):49-54. (2006) <b>[PMID: 19880856]</b> Hardy R, Wills AK, Wong A, Elks CE, Wareham NJ, Loos RJ, Kuh D, Ong KK. Life course                                                                                                                                                                                                                                                                                                                                                                        |



**Supplementary Table 2. Study design, number of individuals, and sample quality control for studies in stage 1, stage 2, or ancillary analyses**

| Study            |                                                                                              | Study design                          | Ethnicity        | Total sample size (N) | Sample QC  |                                                                                                                | Samples in analyses (N) | Anthropometric assessment method | References                                                                                                                                                                                                                                                                                                                                                      |
|------------------|----------------------------------------------------------------------------------------------|---------------------------------------|------------------|-----------------------|------------|----------------------------------------------------------------------------------------------------------------|-------------------------|----------------------------------|-----------------------------------------------------------------------------------------------------------------------------------------------------------------------------------------------------------------------------------------------------------------------------------------------------------------------------------------------------------------|
| Short name       | Full name                                                                                    |                                       |                  |                       | Call rate* | Other exclusions                                                                                               |                         |                                  |                                                                                                                                                                                                                                                                                                                                                                 |
|                  |                                                                                              |                                       |                  |                       |            |                                                                                                                |                         |                                  | variations in the associations between FTO and MC4R gene variants and body size. Hum Mol Genet. 19(3):545-52 (2010).                                                                                                                                                                                                                                            |
| PIVUS            | Prospective Investigation of the Vasculature in Uppsala Seniors                              | Population-based                      | White European   | 999                   | ≥90%       | 1) Related individuals and duplicates<br>2) Heterozygosity, (F-mean(F))/sd(Z) ≥ 5<br>3) Missing all phenotypes | 978                     | measured                         | <b>[PMID: 16141402]</b> Lind, L. et al. A comparison of three different methods to evaluate endothelium-dependent vasodilation in the elderly: the Prospective Investigation of the Vasculature in Uppsala Seniors (PIVUS) study. Arterioscler Thromb Vasc Biol 25, 2368-75 (2005).                                                                             |
| ULSAM            | Uppsala Longitudinal Study of Adult Men                                                      | Population-based                      | White European   | 1221                  | ≥90%       | 1) Related individuals and duplicates<br>2) Heterozygosity, (F-mean(F))/sd(Z) ≥ 5<br>3) Missing all phenotypes | 1116                    | measured                         | <b>[PMID: 16030278]</b> Ingelsson, E. et al. Insulin resistance and risk of congestive heart failure. JAMA 20, 334-41 (2005).                                                                                                                                                                                                                                   |
| STR              | Swedish Twin Registry                                                                        | Population-based                      | White European   | 2702                  | ≥90%       | 1) Heterozygosity, (F-mean(F))/sd(Z) ≥ 5<br>2) Missing all phenotypes                                          | 2430                    | measured                         | <b>[PMID: 17254424]</b> Lichtenstein, P. et al. The Swedish Twin Registry in the third millennium: an update. Twin Res Hum Genet 9, 875-82 (2006).                                                                                                                                                                                                              |
| THISEAS controls | The Hellenic study of Interactions between Snps and Eating in Atherosclerosis Susceptibility | CAD controls                          | European         | 981                   | 0.97       | 1) heterozygosity;<br>2) ethnic outliers;<br>3) duplicates; 4) missing phenotypes; 5) call rate < 0.95         | 981                     | measured                         | <b>[PMID: 20167083]</b> Theodoraki EV. et al. Fibrinogen beta variants confer protection against coronary artery disease in a Greek case-control study. BMC Med Genet. 2010 Feb 18;11:28.                                                                                                                                                                       |
| THISEAS cases    | The Hellenic study of Interactions between Snps and Eating in Atherosclerosis Susceptibility | CAD cases                             | European         | 514                   | 0.97       | 1) heterozygosity;<br>2) ethnic outliers;<br>3) duplicates; 4) missing phenotypes; 5) call rate < 0.95         | 514                     | measured                         | <b>[PMID: 20167083]</b> Theodoraki EV. et al. Fibrinogen beta variants confer protection against coronary artery disease in a Greek case-control study. BMC Med Genet. 2010 Feb 18;11:28.                                                                                                                                                                       |
| WHITEHALL        | The Whitehall II study                                                                       | Cohort of London-based civil servants | European descent | 3413                  | ≥ 95%      | 1) Missing body weight and height.<br>2) Heterozygosity<br>3) gender check                                     | 3377                    | measured                         | <b>[PMID: 15576467]</b> Marmot M, Brunner E. Cohort Profile: the Whitehall II study. Int J Epidemiol. 2005; 34:251-6.<br><b>[PMID: 21441441]</b> Jensen AC et al. Associations of common genetic variants with age-related changes in fasting and postload glucose: evidence from 18 years of follow-up of the Whitehall II cohort. Diabetes. 2011; 60:1617-23. |

**Supplementary Table 2. Study design, number of individuals, and sample quality control for studies in stage 1, stage 2, or ancillary analyses**

| Study                                         |                                               | Study design                                 | Ethnicity      | Total sample size (N) | Sample QC                                                                                        |                                                                                                                                                                                                           | Samples in analyses (N) | Anthropometric assessment method                              | References                                                                                                                                                                                                                                       |
|-----------------------------------------------|-----------------------------------------------|----------------------------------------------|----------------|-----------------------|--------------------------------------------------------------------------------------------------|-----------------------------------------------------------------------------------------------------------------------------------------------------------------------------------------------------------|-------------------------|---------------------------------------------------------------|--------------------------------------------------------------------------------------------------------------------------------------------------------------------------------------------------------------------------------------------------|
| Short name                                    | Full name                                     |                                              |                |                       | Call rate*                                                                                       | Other exclusions                                                                                                                                                                                          |                         |                                                               |                                                                                                                                                                                                                                                  |
| WTCCC T2D nonGWAS                             | Wellcome Trust Case Control Consortium T2D    | Population-based                             | White European | 1335                  | For SNPs with MAF $\geq 5\%$ : $\geq 95\%$<br>For SNPs with $\geq 1\%$ MAF $< 5\%$ : $\geq 99\%$ | MAF $\geq 1\%$ ; genotype clustering, call rate, HWE, MI of alleles, concordance rate, correct SNP mapping                                                                                                | 1077                    | measured                                                      | <b>[PMID: 17554300]</b> The Wellcome Trust Case Control Consortium. Genome-wide association study of 14,000 cases of seven common diseases and 3,000 shared controls. Nature 447, 661-678 (2007)                                                 |
| <b>Ancillary Studies</b>                      |                                               |                                              |                |                       |                                                                                                  |                                                                                                                                                                                                           |                         |                                                               |                                                                                                                                                                                                                                                  |
| Essen Obesity Study (Essen Case-Control GWAS) | Essen Obesity Study (Essen Case-Control GWAS) | Case-Control                                 | White European | 888                   | $\geq 95\%$                                                                                      | 1) ethnic outliers;<br>2) related individuals and duplicates;<br>3) Missing BMI and age;<br>4) per sample call rate $\geq 95\%$ .                                                                         | 888                     | measured                                                      | <b>[PMID: 18159244]</b> Hinney, A. et al. Genome wide association (GWA) study for early onset extreme obesity supports the role of fat mass and obesity associated gene (FTO) variants. PLoS One 26,2(12):e1361 (2007).                          |
| Essen Obesity Study (Essen Obesity Trio GWAS) | Essen Obesity Study (Essen Obesity Trio GWAS) | Family-based (trios)                         | White European | 2,183                 | $\geq 95\%$                                                                                      | 1) Mendelian inconsistencies per family $> 5\%$ ;<br>2) ethnic outliers;<br>3) duplicates;<br>4) Missing BMI and age in offspring;<br>5) per sample call rate $\geq 95\%$ .                               | 2,115                   | measured                                                      | <b>[PMID: 21131291]</b> Jarick, I. et al. Novel common copy number variation for early onset extreme obesity on chromosome 11q11 identified by a genome-wide analysis. Hum Mol Genet. 15, 20(4):840-52 (2011).                                   |
| French Extreme Obesity Study                  | French Extreme Obesity Study                  | Case-Control                                 | White European | 2,796                 | $\geq 95\%$                                                                                      | 1) Ethnic outliers<br>2) Missing BMI<br>3) Per sample call rate $> 0.9$                                                                                                                                   | 2,652                   | measured                                                      | <b>[PMID: 19151714]</b> Meyre, D. et al. Genome-wide association study for early-onset and morbid adult obesity identifies three new risk loci in European populations. Nature Genetics 2009 Feb;41(2):157-9. Epub 2009 Jan 18. Unpublished data |
| GEO-IT                                        | Genetic of Extreme Obesity-Italy              | Case-Control                                 | White European | 3948                  | $\geq 98\%$                                                                                      | 1) heterozygosity $< 23\%$ or $> 30\%$ ;<br>2) $> 5.0\%$ discordance in SNP pairs with $r^2 = 1$ in HapMap;<br>3) ethnic outliers;<br>4) related individuals and duplicates;<br>5) Missing phenotype data | 3509                    | measured                                                      | Unpublished data                                                                                                                                                                                                                                 |
| GOYA                                          | Genetics of Overweight Young Adults           | Women - birth cohort, men - population based | White European | 5536                  | $\geq 95\%$                                                                                      | 2) individuals who did not cluster with CEU individuals<br>3) heterozygosity $< 30.2\%$ or $> 35\%$<br>4) related individuals and duplicates<br>5) sex discrepancies                                      | 5373                    | women - self-reported<br>men - taken from draft board records | <b>[PMID: 21935397]</b> Paternoster, L. et al. Genome-wide population-based association study of extremely overweight young adults - The GOYA study                                                                                              |

**Supplementary Table 2. Study design, number of individuals, and sample quality control for studies in stage 1, stage 2, or ancillary analyses**

| Study      |           | Study design | Ethnicity | Total sample size (N) | Sample QC  |                                               | Samples in analyses (N) | Anthropometric assessment method | References |
|------------|-----------|--------------|-----------|-----------------------|------------|-----------------------------------------------|-------------------------|----------------------------------|------------|
| Short name | Full name |              |           |                       | Call rate* | Other exclusions                              |                         |                                  |            |
|            |           |              |           |                       |            | 6) genotypes discordant with previous project |                         |                                  |            |

\* Call rate to exclude individuals for whom genotyping success rate is less than a certain percentage (to exclude 'bad' samples/DNA)

**Supplementary Table 3. Information on genotyping methods, quality control, imputation, and statistical analysis for studies included in stage 1 and stage 2 and ancillary studies**

| Study              | Genotyping                                 |                            |                    |            |                    |                           | Imputation          |                    |                     | Association analyses  |                   |
|--------------------|--------------------------------------------|----------------------------|--------------------|------------|--------------------|---------------------------|---------------------|--------------------|---------------------|-----------------------|-------------------|
|                    | Platform                                   | Genotype calling algorithm | Inclusion criteria |            |                    | SNPs that met QC criteria | Imputation software | Inclusion criteria |                     | SNPs in meta-analysis | Analyses software |
|                    |                                            |                            | MAF                | Call rate* | P for HWE          |                           |                     | MAF                | Imputation quality* |                       |                   |
| <b>Stage 1:</b>    |                                            |                            |                    |            |                    |                           |                     |                    |                     |                       |                   |
| ADVANCE controls   | Illumina HumanHap550 v.3                   | BeadStudio (GenCall)       | NA                 | ≥ 98.5%    | > 0.001            | 557,883                   | IMPUTE              | NA                 | proper-info ≥ 0.40  | 2307251               | SNPTEST           |
| ADVANCE cases      | Illumina HumanHap550 v.3                   | BeadStudio (GenCall)       | NA                 | ≥ 95%      | > 0.001            | 557,883                   | IMPUTE              | NA                 | proper-info ≥ 0.40  | 2295533               | SNPTEST           |
| AGES               | Illumina Human370CNV                       | BeadStudio                 | ≥ 1%               | ≥ 95%      | > 10 <sup>-6</sup> | 308,340                   | MACH                | none               | none                | 2465835               | ProbABEL          |
| ARIC               | Affymetrix Genome-Wide Human SNP Array 6.0 | Birdseed                   | ≥ 1%               | ≥ 90%      | > 10 <sup>-6</sup> | 685,812                   | MACH v1.0.16        | >1%                |                     | 2557252               | ProbABEL          |
| B58C-T1DGC         | Illumina HumanHap 550 V.1                  | ILLUMINUS                  | > 0%               | -          | -                  | 539,458                   | MACH                | > 0%               | r2-hat ≥ 0.30       | 2507988               | ProbABEL          |
| B58C-WTCCC         | Affymetrix GeneChip Human Mapping 500K     | CHIAMO                     | > 0%               | -          | -                  | 490,032                   | IMPUTE              | ≥ 0%               | proper-info ≥ 0.40  | 2448428               | SNPTEST           |
| BRIGHT             | Affymetrix GeneChip Human Mapping 500K     | CHIAMO                     | ≥ 5%               | ≥ 95%      | > 10 <sup>-6</sup> | 387,666                   | IMPUTE              | none               | proper-info ≥ 0.40  | 2429493               | SNPTEST           |
| CAD WTCCC          | Affymetrix GeneChip Human Mapping 500K     | CHIAMO                     | > 5%               | ≥ 95%      | > 10 <sup>-6</sup> | 387,667                   | IMPUTE              | none               | proper-info ≥ 0.40  | 2430162               | SNPTEST           |
| CAPS1 cases        | Affymetrix GeneChip Human Mapping 500K     | BRLMM                      | ≥ 1%               | ≥ 95%      | > 10 <sup>-7</sup> | 330,124                   | IMPUTE              | none               | proper-info ≥ 0.40  | 2388288               | SNPTEST           |
| CAPS1 controls     | Affymetrix GeneChip Human Mapping 500K     | BRLMM                      | ≥ 1%               | ≥ 95%      | > 10 <sup>-7</sup> | 330,124                   | IMPUTE              | none               | proper-info ≥ 0.40  | 2391197               | SNPTEST           |
| CAPS2 cases        | Affymetrix GeneChip Human Mapping 5.0K     | BLRMM-P                    | ≥ 1%               | ≥ 95%      | > 10 <sup>-7</sup> | 348,163                   | IMPUTE              | none               | proper-info ≥ 0.40  | 2416628               | SNPTEST           |
| CAPS2 controls     | Affymetrix GeneChip Human Mapping 5.0K     | BLRMM-P                    | ≥ 1%               | ≥ 95%      | > 10 <sup>-7</sup> | 348,163                   | IMPUTE              | none               | proper-info ≥ 0.40  | 2392236               | SNPTEST           |
| CHS                | Illumina 370CNV                            | BeadStudio                 | NA                 | ≥ 97%      | ≥ 10 <sup>-5</sup> | 306,655                   | BimBam v0.99        | NA                 | NA                  | 2333818               | R 2.10            |
| CoLaus             | Affymetrix GeneChip Human Mapping 500K     | BRLMM                      | ≥ 1%               | ≥ 70%      | > 10 <sup>-7</sup> | 390,631                   | IMPUTE              | ≥ 0%               | r2-hat ≥ 0.30       | 2483593               | Matlab            |
| COROGENE controls  | Illumina Human 660 000 BeadChip            | ILLUMINUS                  | ≥ 5%               | ≥ 95%      | > 10 <sup>-6</sup> | 554,987                   | MACH                | -                  | -                   | 2543887               | PLINK, ProbABEL   |
| COROGENE cases     | Illumina Human 660 000 BeadChip            | ILLUMINUS                  | ≥ 5%               | ≥ 95%      | > 10 <sup>-6</sup> | 554,987                   | MACH                | -                  | -                   | 2543887               | PLINK, ProbABEL   |
| deCODE             | Illumina HumanHap300 or HumanHapCNV370     | BeadStudio                 | ≥ 1%               | ≥ 96%      | > 10 <sup>-6</sup> | 290,447                   | IMPUTE              | > 0%               | proper-info ≥ 0.40  | 2456118               | SNPTEST           |
| DGI controls       | Affymetrix 500K                            | BRLMM                      | ≥ 1%               | ≥ 95%      | > 10 <sup>-6</sup> | 386,731                   | MACH                | > 0%               | r2-hat ≥ 0.30       | 2375087               | MACH2QTL          |
| DGI Cases          | Affymetrix 500K                            | BRLMM                      | ≥ 1%               | ≥ 95%      | > 10 <sup>-6</sup> | 386,731                   | MACH                | > 0%               | r2-hat ≥ 0.30       | 2375087               | MACH2QTL          |
| EGCUT              | Illumina Human370CNV-duo /-quad            | GenomeStudio               | ≥ 1%               | ≥ 95%      | > 10 <sup>-6</sup> | 316,924                   | IMPUTE              | NA                 | NA                  | 2552661               | SNPTEST           |
| EPIC-Obesity Study | Affymetrix GeneChip Human Mapping 500K     | BRLMM                      | ≥ 1%               | ≥ 90%      | > 10 <sup>-6</sup> | 382,037                   | IMPUTE              | ≥ 1%               | proper-info ≥ 0.40  | 2565027               | SNPTEST           |
| ERF                | Illumina 318k, 370k and affymetrix 250k    | Beadstudio, BRLMM          | ≥ 1%               | ≥ 95%      | > 10 <sup>-6</sup> | up to 427922              | MACH                | ≥ 1%               | NA                  | 2543887               | ProbABEL          |
| FamHS              | ILLUMINA 550K                              | BEADSTUDIO-GENCALL v3.0    | ≥ 1%               | N.A.       | ≥ 10 <sup>-6</sup> | 456,293                   | MACH                | exclusions         | no exclusions       | 2543887               | SAS               |
| Fenland            | Affymetrix SNPs5.0                         | BRLMM                      | ≥ 1%               | ≥ 90%      | > 10 <sup>-6</sup> | 362,055                   | IMPUTE              | > 0%               | proper-info ≥ 0.40  | 2555899               | SNPTEST           |
| FRAM               | Affymetrix 500K supplemental               | BRLMM                      | ≥ 1%               | ≥ 97%      | > 10 <sup>-6</sup> | 378,163                   | MACH v1.0.15        | > 1%               | RATIO ≥ 0.3         | 2543800               | R                 |
| FUSION controls    | Illumina Infinium™ II HumanHap300 BeadChip | BeadStudio                 | ≥ 1%               | ≥ 90%      | ≥ 10 <sup>-6</sup> | 315,635                   | MACH                | > 5%               | r2-hat ≥ 0.30       | 2466546               | ProbABEL          |
| FUSION Cases       | Illumina Infinium™ II HumanHap300 BeadChip | BeadStudio                 | ≥ 1%               | ≥ 90%      | ≥ 10 <sup>-6</sup> | 315,635                   | MACH                | > 5%               | r2-hat ≥ 0.30       | 2466546               | ProbABEL          |
| GENMETS            | Illumina Human610K                         | ILLUMINUS                  | > 1%               | > 95%      | 0.000001           | 555,388                   | MACH 1.16           | > 1%               | Rsq > 0.3           | 2543887               | ProbABEL          |

**Supplementary Table 3. Information on genotyping methods, quality control, imputation, and statistical analysis for studies included in stage 1 and stage 2 and ancillary studies**

| Study                      | Genotyping                                                                   |                                         |                    |            |                      |                           | Imputation                 |                              |                     | Association analyses  |                           |
|----------------------------|------------------------------------------------------------------------------|-----------------------------------------|--------------------|------------|----------------------|---------------------------|----------------------------|------------------------------|---------------------|-----------------------|---------------------------|
|                            | Platform                                                                     | Genotype calling algorithm              | Inclusion criteria |            |                      | SNPs that met QC criteria | Imputation software        | Inclusion criteria           |                     | SNPs in meta-analysis | Analyses software         |
|                            |                                                                              |                                         | MAF                | Call rate* | P for HWE            |                           |                            | MAF                          | Imputation quality* |                       |                           |
| GerMIFS1                   | Affymetrix Mapping 500k Array Set                                            | BRLMM                                   | ≥ 1%               | ≥ 98%      | > 10 <sup>-4</sup>   | 266,622                   | IMPUTE                     | ≥ 1%                         | Proper-info ≥ 0     | 2543887               | SNPTEST                   |
| GerMIFS2                   | Affymetrix Genome-Wide Human SNP Array 6.0                                   | Birdseed                                | ≥ 1%               | ≥ 98%      | > 10 <sup>-4</sup>   | 560,682                   | IMPUTE                     | ≥ 1%                         | Proper-info ≥ 0     | 2543887               | SNPTEST                   |
| GOOD                       | Illumina Infinium HumanHap 610K                                              | BeadStudio                              | ≥ 1%               | ≥ 98%      | > 10 <sup>-6</sup>   | 521,160                   | MACH                       | -                            | -                   | 2543887               | MACH2QTL                  |
| HBCS                       | Illumina custom made BeadChip Human 670-Quad                                 | Illuminus                               | ≥ 5%               | ≥ 95%      | > 10 <sup>-6</sup>   | 533,491                   | MACH                       | -                            | -                   | 2543887               | PLINK, ProbABEL           |
| KORA S3                    | Affymetrix 500K                                                              | BRLMM                                   | none               | ≥ 90%      | none                 | 490,032                   | MACH v1.0.9                | none                         | none                | 2557252               | MACH2DAT                  |
| KORA S4                    | Affymetrix 6.0                                                               | Birdseed                                | none               | ≥ 93%      | none                 | 651,596                   | MACH v1.0.15               | none                         | none                | 2543887               | MACH2DAT                  |
| MGS                        | Affymetrix Genome-Wide Human SNP Array 6.0                                   | Birdsuite 2.0                           | ≥ 1%               | ≥ 95%      | > 10 <sup>-6</sup>   | 696,492                   | MACH 1.0                   | ≥ 1%                         | R2 > 0.3            | 696492                | PLINK and local software  |
| MICROS                     | Illumina Infinium II HumanHap 300v2                                          | BeadStudio                              | ≥ 1%               | ≥ 98%      | > 10 <sup>-6</sup>   | 292,917                   | MACH                       | ≥ 0%                         | r2_hat ≥ 0.3        | 2437189               | ProbABEL                  |
| Migen (cases)              | Affymetrix 6.0 Array                                                         | Birdseed                                | > 0.01             | > 0.95     | 1 x 10 <sup>-6</sup> | 618,475                   | MACH(1.0.15)               | > 0.01                       | r2_hat ≥ 0.30       | 2271906               | MACH2QTL                  |
| Migen (controls)           | Affymetrix 6.0 Array                                                         | Birdseed                                | > 0.02             | > 0.96     | 2 x 10 <sup>-6</sup> | 618,475                   | MACH(1.0.15)               | > 0.02                       | r2_hat ≥ 0.31       | 2271906               | MACH2QTL                  |
| NBS WTCCC                  | Affymetrix GeneChip Human Mapping 500K                                       | CHIAMO                                  | > 5%               | ≥ 95%      | > 10 <sup>26</sup>   | 387,667                   | IMPUTE                     | none                         | proper_info ≥ 0.40  | 2415681               | SNPTEST                   |
| NFBC                       | Illumina HumanCNV 370DUO Analysis BeadChip                                   | Standard Illumina BeadStudio            | > 5%               | ≥ 95%      | > 10 <sup>24</sup>   | 328,007                   | IMPUTE                     | none                         | proper_info ≥ 0.40  | 2458713               | SNPTEST                   |
| NHS                        | Affymetrix Genome-Wide Human 6.0 array                                       | Birdseed calling algorithm v2           | ≥ 2%               | ≥ 98%      | > 10 <sup>-4</sup>   | 704,409                   | MACH                       | ≥ 2%                         | MACH r2_hat ≥ 0.8   | 2509969               | ProbABEL                  |
| NSPHS                      | Illumina Infinium II HumanHap 300v2                                          | BeadStudio                              | ≥ 0%               | ≥ 98%      | > 10 <sup>-9</sup>   | 318,236                   | MACH                       | ≥ 1%                         | r2_hat ≥ 0.3        | 2382230               | ProbABEL                  |
| NTR and NESDA MDD controls | Perlegen / Affymetrix 600K gene chip                                         | Perlegen proprietary                    | ≥ 1%               | ≥ 95%      | > 10 <sup>-5</sup>   | 435,291                   | IMPUTE                     | ≥ 1%                         | proper-info ≥ 0.40  | 2543887               | SNPTEST                   |
| NTR and NESDA MDD cases    | Perlegen / Affymetrix 600K gene chip                                         | Perlegen proprietary                    | ≥ 1%               | ≥ 95%      | > 10 <sup>-5</sup>   | 435,291                   | IMPUTE                     | ≥ 1%                         | proper-info ≥ 0.40  | 2543887               | SNPTEST                   |
| ORCADES                    | Illumina Infinium II HumanHap 300v2                                          | BeadStudio                              | ≥ 1%               | ≥ 98%      | > 10 <sup>-6</sup>   | 306,207                   | MACH                       | ≥ 0%                         | r2_hat ≥ 0.3        | 2442003               | ProbABEL                  |
| PLCO                       | Illumina HumanHap300 and Illumina HumanHap240                                | Bead Studio                             | none               | ≥ 90%      | none                 | 523,231                   | MACH                       | ≥ 1%                         | MACH r2_hat ≥ 0.30  | 2527018               | MACH2DAT                  |
| PROCARDIS                  | Illumina HumanHap300 BeadChips                                               | Illumina Beadstudio 2.0 software        | > 5%               | ≥ 95%      | > 5x10 <sup>27</sup> | ~820 000                  | IMPUTE                     | none                         | proper_info ≥ 0.40  | 2581539               | SNPTEST                   |
| RUNMC                      | Illumina HumanHapCNV370                                                      | BeadStudio                              | ≥ 1%               | ≥ 96%      | > 10 <sup>-6</sup>   | 312,199                   | IMPUTE                     | > 0%                         | proper-info ≥ 0.40  | 2465662               | SNPTEST                   |
| RS1                        | Illumina / HumanHap 550 V.3                                                  | Beadstudio Genecall                     | ≥ 1%               | ≥ 97.5%    | > 10 <sup>-6</sup>   | 512,349                   | MACH                       | ≥ 1%                         | (O/E)σ2 ratio ≥ 0.1 | 2543887               | MACH                      |
| SASBAC cases               | Illumina HumanHap300+240S                                                    | BeadStudio (GenCall)                    | ≥ 3%               | ≥ 90%      | > 10 <sup>-7</sup>   | 510,578                   | IMPUTE                     | none                         | proper-info ≥ 0.40  | 2491837               | SNPTEST                   |
| SASBAC controls            | Illumina HumanHap550 Affymetrix GeneChip                                     | BeadStudio (GenCall)                    | ≥ 3%               | ≥ 90%      | > 10 <sup>-7</sup>   | 512,223                   | IMPUTE                     | none                         | proper-info ≥ 0.40  | 2474796               | SNPTEST                   |
| SardiNIA                   | Human Mapping 500K and Affymetrix 10K                                        | BRLMM                                   | ≥ 5%               | ≥ 90%      | > 10 <sup>-6</sup>   | 356,359                   | MACH                       | > 0%                         | r2_hat ≥ 0.30       | 2251689               | MACH2DAT                  |
| SEARCH                     | Illumina 610                                                                 | Bead Studio                             | ≥ 1%               | ≥ 95%      | > 10 <sup>-4</sup>   | 495,229                   | In house similar to Impute | ≥ 1%                         | none                | 2552155               | Routines written in C++   |
| SHIP                       | Affymetrix Human SNP Array 6.0                                               | Birdseed V2                             | ≥ 0%               | ≥ 0%       | none                 | 869,224                   | IMPUTE v0.5.0              | ≥ 0%                         | NA                  | 2748910               | QUICKTEST 0.94 InforSense |
| Sorbs                      | 500K Affymetrix GeneChip (250K Sty and 250K Nsp arrays, Affymetrix, Inc) and | BRLMM (Affy 500K); Birdseed (Array 6.0) | 0.01               | 0.95       | 10 <sup>-4</sup>     | 378,513                   | IMPUTE                     | MAF>1%, HWE<10 <sup>-4</sup> | Proper-info > 0.4   | 2352557               | SNPTEST                   |

**Supplementary Table 3. Information on genotyping methods, quality control, imputation, and statistical analysis for studies included in stage 1 and stage 2 and ancillary studies**

| Study     | Genotyping                                                                  |                            |                    |            |                    |                           | Imputation          |                    |                                     | Association analyses  |                   |
|-----------|-----------------------------------------------------------------------------|----------------------------|--------------------|------------|--------------------|---------------------------|---------------------|--------------------|-------------------------------------|-----------------------|-------------------|
|           | Platform                                                                    | Genotype calling algorithm | Inclusion criteria |            |                    | SNPs that met QC criteria | Imputation software | Inclusion criteria |                                     | SNPs in meta-analysis | Analyses software |
|           |                                                                             |                            | MAF                | Call rate* | P for HWE          |                           |                     | MAF                | Imputation quality*                 |                       |                   |
| TWINSUK   | Affymetrix Genome-Wide Human SNP Array 6.0<br>Illumina / HumanHap 300 & 550 | Illuminus                  | ≥ 1%               | ≥ 95%      | > 10 <sup>-6</sup> | 295,702                   | IMPUTE              | ≥ 1%               | proper-info ≥ 0.40                  | 2544232               | SNPTEST           |
| T2D WTCCC | Affymetrix GeneChip Human Mapping 500K                                      | CHIAMO                     | > 5%               | ≥ 95%      | > 10 <sup>-6</sup> | 387,667                   | IMPUTE              | none               | proper-info ≥ 0.40                  | 2425154               | SNPTEST           |
| VIS       | Illumina Infinium II HumanCNV370v1                                          | BeadStudio                 | ≥ 1%               | ≥ 98%      | > 10 <sup>-6</sup> | 305,068                   | MACH                | ≥ 0%               | r <sup>2</sup> <sub>hat</sub> ≥ 0.3 | 2428707               | ProbABEL          |
| WGHS      | Illumina humanHap 300 DuoPlus                                               | Illumina BeadStudio 3.3    | ≥ 1%               | ≥ 98%      | > 10 <sup>-6</sup> | 339,596                   | MACH v1.0.15        | ≥ 1%               | MACH R2 ≥ 0.3                       | 2608509               | ProbABEL          |
| YFS       | Illumina custom made BeadChip Human 670-Quad                                | Illuminus                  | ≥ 5%               | ≥ 95%      | > 10 <sup>-6</sup> | 546,677                   | MACH                | -                  | -                                   | 2543887               | PLINK, ProbABEL   |

**Supplementary Table 3. Information on genotyping methods, quality control, imputation, and statistical analysis for studies included in stage 1 and stage 2 and ancillary studies**

| Study                       | Genotyping                                                    |                            |                    |            |                    | Imputation                |                     |                    | Association analyses               |                       |                    |
|-----------------------------|---------------------------------------------------------------|----------------------------|--------------------|------------|--------------------|---------------------------|---------------------|--------------------|------------------------------------|-----------------------|--------------------|
|                             | Platform                                                      | Genotype calling algorithm | Inclusion criteria |            |                    | SNPs that met QC criteria | Imputation software | Inclusion criteria |                                    | SNPs in meta-analysis | Analyses software  |
|                             |                                                               |                            | MAF                | Call rate* | P for HWE          |                           |                     | MAF                | Imputation quality*                |                       |                    |
| <b>Stage 2 - In silico:</b> |                                                               |                            |                    |            |                    |                           |                     |                    |                                    |                       |                    |
| B58C-REPL                   | Illumina HumanHap 550 / 610                                   | Gencall                    | > 1%               | ≥ 95%      | > 10 <sup>-4</sup> | 519,080                   | MACH                | > 0%               | r2-hat ≥ 0.30                      | replication set       | ProbABEL           |
| BHS                         | Illumina 610-Quad                                             | Beadstudio                 | ≥ 1%               | ≥ 95%      | > 10 <sup>-7</sup> | 529,596                   | MACH                | ≥ 1%               | r2 ≥ 0.30                          | 2510147               | MACH2DAT, MACH2QTL |
| HYPERGENES controls         | Illumina Human1M-Duov3_B                                      | Genome Studio              | ≥ 1%               | ≥ 90%      | > 10 <sup>-7</sup> | 872,576                   | MACH                | -                  | -                                  | 2543887               | Matlab             |
| HYPERGENES Cases            | Illumina Human1M-Duov3_B                                      | Genome Studio              | ≥ 1%               | ≥ 90%      | > 10 <sup>-7</sup> | 872,576                   | MACH                | -                  | -                                  | 2543887               | Matlab             |
| LifeLines                   | Illumina Cyto SNP12 v2                                        | GenomeStudio               | ≥ 1%               | ≥ 95%      | > 10 <sup>-4</sup> | 257581                    | BEAGLE v3.1.0       | > 0%               | no filtering on imputation quality | 2472812               | PLINK              |
| PLCO2 controls              | Illumina HumanHap 550K; Illumina HumanHap 610K                | Bead Studio                | > 0%               | ≥ 90%      | -                  | 525,262                   | IMPUTE              | ≥ 1%               | proper-info ≥ 0.40                 | 2538067               | PLINK              |
| PLCO2 cases                 | Illumina HumanHap 550K; Illumina HumanHap 610K                | Bead Studio                | > 0%               | ≥ 90%      | -                  | 525,262                   | IMPUTE              | ≥ 1%               | proper-info ≥ 0.40                 | 2564030               | PLINK              |
| PREVEND                     | Illumina HumanCytoSNP-12                                      | GenomeStudio               | ≥ 1%               | > 95%      | 0.0001             | 232,571                   | BEAGLE              | ≥ 1%               | at meta-level                      | 2289210               | PLINK              |
| QIMR                        | Illumina HumanHap 370 or 610                                  | BeadStudio                 | ≥ 1%               | ≥ 95%      | > 10 <sup>-6</sup> | 271,069                   | MACH                | NA                 | NA                                 | 2543887               | PLINK              |
| RS2                         | Illumina / HumanHap 550 V.3 DUO; Illumina / HumanHap 610 QUAD | Genomestudio<br>Genecall   | ≥ 1%               | ≥ 97.5%    | > 10 <sup>-6</sup> | 466,389                   | MACH                | ≥ 1%               | (O/E)σ2 ratio ≥ 0.1                | 2543887               | MACH               |
| RS3                         | Illumina / HumanHap 610 QUAD                                  | Genomestudio<br>Genecall   | ≥ 1%               | ≥ 97.5%    | > 10 <sup>-6</sup> | 466,389                   | MACH                | ≥ 1%               | (O/E)σ2 ratio ≥ 0.1                | 2543887               | MACH               |
| TRAILS                      | Illumina Cyto SNP12 v2                                        | GenomeStudio               | ≥ 1%               | ≥ 95%      | > 10 <sup>-4</sup> | 260,127                   | IMPUTE2             | ≥ 0%               | proper-info ≥ 0.0                  | 2633433               | SNPTEST            |
| TWINGENE                    | Illumina HumanOmniExpress                                     | GenomeStudio 2010.3        | ≥ 1%               | ≥ 97%      | > 10 <sup>-7</sup> | 644,556                   | IMPUTE2             | n.a.               | n.a.                               | 2585373               | PLINK              |
| UKBS2                       | Affymetrix Genome-Wide Human SNP Array 6.0                    | CHIAMO                     | ≥ 1%               | ≥ 95%      | > 10 <sup>-6</sup> | 754,588                   | IMPUTE              | ≥ 1%               | info ≥ 0.40                        | 2536100               | SNPTEST            |

**Supplementary Table 3. Information on genotyping methods, quality control, imputation, and statistical analysis for studies included in stage 1 and stage 2 and ancillary studies**

| Study                                         | Genotyping                                                                                                                     |                                                |                    |            |                    |                                                             |                                                                                                                             |                           | Analyses software |
|-----------------------------------------------|--------------------------------------------------------------------------------------------------------------------------------|------------------------------------------------|--------------------|------------|--------------------|-------------------------------------------------------------|-----------------------------------------------------------------------------------------------------------------------------|---------------------------|-------------------|
|                                               | Genotyping center                                                                                                              | Genotype calling algorithm                     | Inclusion criteria |            |                    |                                                             |                                                                                                                             | SNPs that met QC criteria |                   |
|                                               |                                                                                                                                |                                                | MAF                | Call rate* | P for HWE          | Discordance rate                                            | Other                                                                                                                       |                           |                   |
| <b>Stage 2 - Metabochip:</b>                  |                                                                                                                                |                                                |                    |            |                    |                                                             |                                                                                                                             |                           |                   |
| AMC-PAS                                       | Wellcome Trust Sanger Institute                                                                                                | GenoSNP                                        | none               | ≥ 98%      | > 10 <sup>-4</sup> | < 10%                                                       | na                                                                                                                          | 169807                    | PLINK             |
| CARDIOGENIC S controls                        | Wellcome Trust Sanger Institute                                                                                                | GenoSNP                                        | none               | ≥ 98%      | > 10 <sup>-4</sup> | < 10%                                                       | na                                                                                                                          | 177614                    | PLINK             |
| CARDIOGENIC S cases                           | Wellcome Trust Sanger Institute                                                                                                | GenoSNP                                        | none               | ≥ 98%      | > 10 <sup>-4</sup> | < 10%                                                       | na                                                                                                                          | 177614                    | PLINK             |
| D2D2007.DPS.D RSEXTRA.FUSION2.METSIM controls | Johns Hopkins University Genetic Resources Core Facility SNP Center at the Center for Inherited Disease Research, Baltimore MD | BeadStudio version 3.3.7, Gentrain version 1.0 | > 0%               | ≥ 95%      | none               | none                                                        | Cluster Separation score less than 0.2 or which had more than 1 Replicate error as defined with the HapMap control samples. | 145498                    | PLINK             |
| D2D2007.DPS.D RSEXTRA.FUSION2.METSIM cases    | Johns Hopkins University Genetic Resources Core Facility SNP Center at the Center for Inherited Disease Research, Baltimore MD | BeadStudio version 3.3.7, Gentrain version 1.0 | > 0%               | ≥ 95%      | none               | none                                                        | Cluster Separation score less than 0.2 or which had more than 1 Replicate error as defined with the HapMap control samples. | 138627                    | PLINK             |
| DILGOM                                        | The FIMM Technology Centre, Helsinki, Finland                                                                                  | GenCall                                        | none               | ≥ 95%      | none               | none                                                        | none                                                                                                                        | 183872                    | PLINK             |
| GoDARTS controls                              | Cambridge Genomic Services, Department of Pathology, University of Cambridge, UK                                               | GeneCall                                       | ≥ 1%               | ≥ 95%      | > 10 <sup>-6</sup> | 1 duplicate pair with genotype concordance rate=1 and IBD=1 | NA                                                                                                                          | 180399                    | SNPTEST           |
| GoDARTS cases                                 | Cambridge Genomic Services, Department of Pathology, University of Cambridge, UK                                               | GeneCall                                       | ≥ 1%               | ≥ 95%      | > 10 <sup>-6</sup> | 1 duplicate pair with genotype concordance rate=1 and       | NA                                                                                                                          | 180399                    | SNPTEST           |



**Supplementary Table 3. Information on genotyping methods, quality control, imputation, and statistical analysis for studies included in stage 1 and stage 2 and ancillary studies**

| Study                 | Genotyping center                                                                                                                              | Genotype calling algorithm                      | Genotyping         |            |                    |                  |                                                                                                                                                                           | SNPs that met QC criteria | Analyses software |
|-----------------------|------------------------------------------------------------------------------------------------------------------------------------------------|-------------------------------------------------|--------------------|------------|--------------------|------------------|---------------------------------------------------------------------------------------------------------------------------------------------------------------------------|---------------------------|-------------------|
|                       |                                                                                                                                                |                                                 | Inclusion criteria |            |                    |                  |                                                                                                                                                                           |                           |                   |
|                       |                                                                                                                                                |                                                 | MAF                | Call rate* | P for HWE          | Discordance rate | Other                                                                                                                                                                     |                           |                   |
|                       |                                                                                                                                                |                                                 |                    |            |                    | IBD=1            |                                                                                                                                                                           |                           |                   |
| EGCUT controls        | Estonian Genome Center of University of Tartu                                                                                                  | GeneCall                                        | > 0%               | ≥ 95%      | > 10 <sup>-6</sup> | NA               | NA                                                                                                                                                                        | 120720                    | SNPTEST           |
| EGCUT CAD             | Estonian Genome Center of University of Tartu                                                                                                  | GeneCall                                        | > 0%               | ≥ 95%      | > 10 <sup>-6</sup> | NA               | NA                                                                                                                                                                        | 120720                    | SNPTEST           |
| EGCUT T2D             | Estonian Genome Center of University of Tartu                                                                                                  | GeneCall                                        | > 0%               | ≥ 95%      | > 10 <sup>-6</sup> | NA               | NA                                                                                                                                                                        | 120720                    | SNPTEST           |
| ELY                   | Cambridge Genomic Services, Department of Pathology, University of Cambridge, UK                                                               | GeneCall                                        | > 0%               | ≥ 90%      | > 10 <sup>-6</sup> | < 3%             | NA                                                                                                                                                                        | 149302                    | PLINK             |
| EPIC Controls & cases | Cambridge Genomic Services, Department of Pathology, University of Cambridge, UK                                                               | GeneCall                                        | > 0%               | ≥ 90%      | > 10 <sup>-6</sup> | < 3%             | NA                                                                                                                                                                        | 143294                    | PLINK             |
| FENLAND               | Cambridge Genomic Services, Department of Pathology, University of Cambridge, UK                                                               | GeneCall                                        | > 0%               | ≥ 90%      | > 10 <sup>-6</sup> | < 3%             | NA                                                                                                                                                                        | 167085                    | PLINK             |
| GLACIER               | Wellcome Trust Sanger Institute, Wellcome Trust Genome Campus, CB10 1SA, Hinxton, UK                                                           | Illuminus                                       | > 0%               | ≥ 95%      | > 0.00001          | < 3%             | none                                                                                                                                                                      | 149782                    | PLINK             |
| HNR                   | Institute of Human Genetics, University of Bonn, Bonn, Germany. Department of Genomics, Life & Brain Center, University of Bonn, Bonn, Germany | Genetrain 2                                     | none               | ≥ 95%      | > 10 <sup>-6</sup> | < 3%             | NA                                                                                                                                                                        | 192261                    | PLINK             |
| HUNT.TROMSO controls  | Johns Hopkins University Genetic Resources Core Facility SNP Center at the Center for Inherited Disease Research, Baltimore MD                 | BeadStudio version 3.3.7, Genetrain version 1.0 | > 0%               | ≥ 95%      | none               | none             | Cluster Separation score less than 0.2 or which had more than 1 Replicate error as defined with the HapMap control samples. Additional hand editing was done for X, Y and | 143846                    | PLINK             |

**Supplementary Table 3. Information on genotyping methods, quality control, imputation, and statistical analysis for studies included in stage 1 and stage 2 and ancillary studies**

| Study             | Genotyping                                                                                                                     |                                                |                    |            |             |                  |                     |                           | Analyses software |
|-------------------|--------------------------------------------------------------------------------------------------------------------------------|------------------------------------------------|--------------------|------------|-------------|------------------|---------------------|---------------------------|-------------------|
|                   | Genotyping center                                                                                                              | Genotype calling algorithm                     | Inclusion criteria |            |             |                  |                     | SNPs that met QC criteria |                   |
|                   |                                                                                                                                |                                                | MAF                | Call rate* | P for HWE   | Discordance rate | Other               |                           |                   |
| HUNT:TROMSO cases | Johns Hopkins University Genetic Resources Core Facility SNP Center at the Center for Inherited Disease Research, Baltimore MD | BeadStudio version 3.3.7, GenTrain version 1.0 | > 0%               | ≥ 95%      | none        | none             | Mitochondrial loci. | 138863                    | PLINK             |
| IMPROVE           | Wallenberg Genotyping Platform, Molecular Medicine, Department of Medical Sciences, Uppsala University, Uppsala, Sweden        | GeneCall                                       | > 0%               | ≥ 95%      | $> 10^{-6}$ | -                | -                   | 185704                    | PLINK             |
| KORA S3 METABO    | Helmholtz Center Munich                                                                                                        | Genome Studio                                  | none               | none       | none        | none             | none                | 185781                    | ProbABEL/PLINK    |
| KORA S4 METABO    | Helmholtz Center Munich                                                                                                        | Genome Studio                                  | none               | none       | none        | none             | none                | 185781                    | ProbABEL/PLINK    |
| LURIC             | Institute of Human Genetics, Department of Genomics, Life & Brain Center, University of Bonn, Germany                          | GeneTrain 2                                    | -                  | ≥ 90%      | $> 10^{-6}$ | -                | -                   | 191341                    | PLINK             |
| MORGAM Controls   | The Wellcome Trust Sanger Institute, UK                                                                                        | GenCall                                        | none               | none       | none        | none             | none                | 196725                    | PLINK             |
| MoRGAM Cases      | The Wellcome Trust Sanger Institute, UK                                                                                        | GenCall                                        | none               | none       | none        | none             | none                | 196725                    | PLINK             |
| NSHD              | Cambridge Genomic Services, Department of Pathology, University of Cambridge, UK                                               | GeneCall                                       | > 0%               | ≥ 90%      | $> 10^{-6}$ | < 3%             | NA                  | 146474                    | PLINK             |
| PIVUS             | Uppsala SNP&SEQ Technology Platform                                                                                            | GenCall                                        | none               | ≥ 90%      | $> 10^{-6}$ | NA               | NA                  | 185450                    | PLINK             |

**Supplementary Table 3. Information on genotyping methods, quality control, imputation, and statistical analysis for studies included in stage 1 and stage 2 and ancillary studies**

| Study             | Genotyping                                                                                                                                                    |                            |                    |            |                    |                                                             |       |                           | Analyses software |
|-------------------|---------------------------------------------------------------------------------------------------------------------------------------------------------------|----------------------------|--------------------|------------|--------------------|-------------------------------------------------------------|-------|---------------------------|-------------------|
|                   | Genotyping center                                                                                                                                             | Genotype calling algorithm | Inclusion criteria |            |                    |                                                             |       | SNPs that met QC criteria |                   |
|                   |                                                                                                                                                               |                            | MAF                | Call rate* | P for HWE          | Discordance rate                                            | Other |                           |                   |
| ULSAM             | Uppsala SNP&SEQ Technology Platform                                                                                                                           | GenCall                    | none               | ≥ 90%      | > 10 <sup>-6</sup> | NA                                                          | NA    | 183357                    | PLINK             |
| STR               | Uppsala SNP&SEQ Technology Platform                                                                                                                           | GenCall                    | none               | ≥ 90%      | > 10 <sup>-6</sup> | NA                                                          | NA    | 183961                    | R GWAF            |
| THISEAS controls  | Wellcome Trust Sanger Institute                                                                                                                               | GenoSNP                    | none               | ≥ 98%      | > 10 <sup>-4</sup> | < 10%                                                       | na    | 169779                    | PLINK             |
| THISEAS cases     | Wellcome Trust Sanger Institute                                                                                                                               | GenoSNP                    | none               | ≥ 98%      | > 10 <sup>-4</sup> | < 10%                                                       | na    | 169779                    | PLINK             |
| WHITEHALL         | Cambridge Genomic Services, Department of Pathology, University of Cambridge, UK; and UCL Genomics, Molecular Haematology and Cancer Biology Unit, London, UK | GeneCall                   | > 0%               | ≥ 90%      | > 10 <sup>-6</sup> | NA                                                          | NA    | 171257                    | PLINK             |
| WTCCC T2D nonGWAS | Cambridge Genomic Services, Department of Pathology, University of Cambridge, UK                                                                              | GeneCall                   | ≥ 1%               | ≥ 95%      | > 10 <sup>-6</sup> | 1 duplicate pair with genotype concordance rate=1 and IBD=1 | NA    | 178205                    | SNPTEST           |

**Supplementary Table 3. Information on genotyping methods, quality control, imputation, and statistical analysis for studies included in stage 1 and stage 2 and ancillary studies**

| Study                                         | Platform                                                | Genotyping                 |                    |       |                     |         | SNPs that met QC criteria | Imputation software | Imputation          |                     | Association analyses |                       |
|-----------------------------------------------|---------------------------------------------------------|----------------------------|--------------------|-------|---------------------|---------|---------------------------|---------------------|---------------------|---------------------|----------------------|-----------------------|
|                                               |                                                         | Genotype calling algorithm | Inclusion criteria |       |                     | MAF     |                           |                     | MAF                 | Inclusion criteria  |                      | SNPs in meta-analysis |
| MAF                                           | Call rate                                               |                            | P for HWE          | MAF   | Imputation quality  |         |                           |                     |                     |                     |                      |                       |
| <b>Ancillary</b>                              |                                                         |                            |                    |       |                     |         |                           |                     |                     |                     |                      |                       |
| Essen Obesity Study (Essen Case-Control GWAS) | Affymetrix Genome-Wide Human SNP Array 6.0              | Birdseed                   | ≥ 1%               | ≥ 95% | > 0.001 in controls | 727,239 | MACH                      | ≥ 1%                | $r2\_hat \geq 0.30$ | only in replication | SNPT                 |                       |
| Essen Obesity Study (Essen Obesity Trio GWAS) | Affymetrix Genome-Wide Human SNP Array 6.0              | Birdseed                   | ≥ 1%               | ≥ 95% | > 0.001 in parents  | 752,216 | MACH                      | ≥ 1%                | $r2\_hat \geq 0.30$ | only in replication | PLIN                 |                       |
| French Extreme Obesity Study                  | Illumina Human CNV370-Duo array & Illumina HAP300 array | GenCall software           | ≥ 1%               | ≥ 95% | > 0.01              | 308,846 | MACH 1.0                  | ≥ 1%                | proper-info > 0.30  | ~ 2,3 millions      | PLIN                 |                       |
| GEO-IT                                        | Illumina Infinium 660W-Quad                             | GenomeStudio               | ≥ 1%               | ≥ 98% | $> 10^{-6}$         | 519,612 | MACH                      | ≥ 1%                | $Rsq \geq 0.30$     | 249,678             | PLIN                 |                       |
| GOYA                                          | Illumina 610k Quad                                      | GenomeStudio               | ≥ 1%               | ≥ 95% | $> 10^{-7}$         | 545,349 | MACH 1.0                  | ≥ 1%                | $r2 \geq 0.3$       | 2,449,993           | MACH DA1             |                       |

Supplementary Table 4. Study-specific descriptive statistics for studies included in stage 2 and ancillary analyses

| Study                       | Trait                    | Men  |        |       |        |       |        |                      |                         | Women |        |       |        |       |        |                      |                         |
|-----------------------------|--------------------------|------|--------|-------|--------|-------|--------|----------------------|-------------------------|-------|--------|-------|--------|-------|--------|----------------------|-------------------------|
|                             |                          | N    | Mean   | SD    | Median | Min   | Max    | Correlation with BMI | Correlation with height | N     | Mean   | SD    | Median | Min   | Max    | Correlation with BMI | Correlation with height |
| <b>Stage 2 - In silico:</b> |                          |      |        |       |        |       |        |                      |                         |       |        |       |        |       |        |                      |                         |
| B58C-REPL                   | Age (yrs)                | 1230 | 45.19  | 0.36  | 45.17  | 44.25 | 46.00  | -0.01                | -0.01                   | 1192  | 45.20  | 0.38  | 45.17  | 44.25 | 46.00  | 0.03                 | 0.00                    |
|                             | BMI (kg/m <sup>2</sup> ) | 1230 | 27.76  | 4.40  | 27.26  | 16.53 | 56.65  | 1.00                 | -0.02                   | 1192  | 26.85  | 5.52  | 25.54  | 16.29 | 54.25  | 1.00                 | -0.12                   |
|                             | Weight (kg)              | 1230 | 86.29  | 14.98 | 84.60  | 47.00 | 172.50 | 0.89                 | 0.41                    | 1192  | 70.85  | 14.82 | 67.55  | 41.60 | 143.50 | 0.94                 | 0.24                    |
|                             | Height (m)               | 1230 | 1.76   | 0.06  | 1.76   | 1.56  | 2.01   | -0.02                | 1.00                    | 1192  | 1.63   | 0.06  | 1.63   | 1.22  | 1.88   | -0.12                | 1.00                    |
|                             | WC (cm)                  | 1170 | 98.40  | 11.41 | 97.20  | 70.00 | 160.20 | 0.87                 | 0.19                    | 1158  | 85.04  | 12.79 | 82.80  | 57.20 | 133.80 | 0.89                 | 0.06                    |
|                             | Hip (cm)                 | 1170 | 105.77 | 7.73  | 105.10 | 86.00 | 168.20 | 0.82                 | 0.10                    | 1158  | 104.94 | 11.28 | 102.80 | 81.20 | 157.60 | 0.92                 | 0.09                    |
|                             | WHR (cm/cm)              | 1170 | 0.93   | 0.06  | 0.93   | 0.76  | 1.21   | 0.58                 | 0.00                    | 1158  | 0.81   | 0.06  | 0.81   | 0.62  | 1.04   | 0.43                 | 0.00                    |
| BHS                         | Age (yrs)                | 512  | 54.30  | 16.80 | 54.30  | 17.60 | 91.40  | 0.13                 | -0.37                   | 694   | 54.50  | 17.00 | 54.10  | 17.30 | 90.50  | 0.10                 | -0.44                   |
|                             | BMI (kg/m <sup>2</sup> ) | 512  | 26.58  | 3.56  | 26.20  | 15.77 | 40.02  | 1.00                 | -0.07                   | 693   | 25.52  | 4.47  | 24.65  | 16.82 | 40.77  | 1.00                 | -0.15                   |
|                             | Weight (kg)              | 512  | 81.65  | 12.40 | 80.20  | 46.40 | 127.00 | 0.84                 | 0.48                    | 693   | 67.00  | 12.09 | 64.60  | 34.80 | 109.00 | 0.90                 | 0.28                    |
|                             | Height (m)               | 512  | 1.75   | 0.07  | 1.75   | 1.53  | 1.99   | -0.07                | 1.00                    | 694   | 1.62   | 0.06  | 1.62   | 1.35  | 1.81   | -0.16                | 1.00                    |
|                             | WC (cm)                  | 494  | 93.78  | 10.38 | 93.00  | 62.80 | 130.00 | 0.86                 | 0.07                    | 672   | 80.99  | 11.71 | 78.70  | 58.65 | 132.00 | 0.89                 | -0.06                   |
|                             | Hip (cm)                 | 494  | 100.10 | 7.51  | 99.35  | 74.80 | 132.80 | 0.91                 | 0.26                    | 672   | 101.10 | 9.26  | 99.95  | 77.00 | 138.80 | 0.89                 | 0.10                    |
|                             | WHR (cm/cm)              | 494  | 0.94   | 0.06  | 0.93   | 0.75  | 1.17   | 0.51                 | -0.17                   | 672   | 0.80   | 0.07  | 0.79   | 0.64  | 1.05   | 0.51                 | -0.21                   |
| HYPERGENES Cases            | Age (yrs)                | 1080 | 49.81  | 10.32 | 50.00  | 17.78 | 84.00  | 0.04                 | -0.32                   | 542   | 48.22  | 9.37  | 48.44  | 18.38 | 93.00  | 0.11                 | -0.20                   |
|                             | BMI (kg/m <sup>2</sup> ) | 1072 | 27.45  | 3.50  | 27.16  | 16.00 | 47.43  | 1.00                 | -0.07                   | 538   | 26.89  | 4.99  | 26.21  | 17.45 | 52.35  | 1.00                 | -0.09                   |
|                             | Weight (kg)              | 1073 | 81.38  | 12.05 | 80.00  | 49.00 | 139.50 | 0.82                 | 0.51                    | 540   | 68.61  | 13.75 | 67.00  | 44.00 | 164.00 | 0.89                 | 0.36                    |
|                             | Height (m)               | 1072 | 1.72   | 0.07  | 1.72   | 1.49  | 1.96   | -0.07                | 1.00                    | 538   | 1.60   | 0.07  | 1.60   | 1.40  | 1.80   | -0.09                | 1.00                    |
|                             | WC (cm)                  | 170  | 98.37  | 12.04 | 98.00  | 71.00 | 139.00 | 0.89                 | 0.15                    | 152   | 89.30  | 13.71 | 88.00  | 61.00 | 133.00 | 0.89                 | 0.05                    |
|                             | Hip (cm)                 | 170  | 104.51 | 8.82  | 104.00 | 86.00 | 150.00 | 0.84                 | 0.21                    | 152   | 107.26 | 11.51 | 104.40 | 89.00 | 158.00 | 0.91                 | 0.12                    |
|                             | WHR (cm/cm)              | 170  | 0.94   | 0.07  | 0.95   | 0.79  | 1.15   | 0.53                 | 0.01                    | 152   | 0.83   | 0.07  | 0.83   | 0.64  | 1.01   | 0.47                 | -0.05                   |
| HYPERGENES Controls         | Age (yrs)                | 1031 | 62.21  | 10.69 | 59.67  | 28.00 | 98.00  | -0.10                | -0.12                   | 709   | 63.65  | 10.82 | 60.58  | 44.93 | 113.00 | -0.13                | -0.12                   |
|                             | BMI (kg/m <sup>2</sup> ) | 998  | 25.93  | 3.26  | 25.56  | 10.15 | 40.77  | 1.00                 | -0.13                   | 684   | 24.98  | 3.75  | 24.52  | 16.53 | 41.35  | 1.00                 | -0.17                   |
|                             | Weight (kg)              | 1025 | 76.34  | 11.62 | 75.00  | 29.00 | 186.00 | 0.81                 | 0.47                    | 701   | 64.32  | 10.16 | 63.00  | 42.00 | 110.00 | 0.87                 | 0.34                    |
|                             | Height (m)               | 998  | 1.71   | 0.07  | 1.70   | 1.50  | 1.92   | -0.13                | 1.00                    | 684   | 1.61   | 0.06  | 1.60   | 1.40  | 1.81   | -0.17                | 1.00                    |
|                             | WC (cm)                  | 130  | 95.21  | 9.85  | 93.88  | 72.50 | 120.30 | 0.85                 | 0.27                    | 159   | 84.96  | 10.69 | 83.50  | 62.80 | 119.80 | 0.81                 | 0.21                    |
|                             | Hip (cm)                 | 130  | 102.56 | 6.30  | 102.75 | 87.00 | 118.50 | 0.82                 | 0.32                    | 159   | 103.19 | 8.30  | 102.00 | 84.00 | 134.50 | 0.84                 | 0.23                    |

**Supplementary Table 4. Study-specific descriptive statistics for studies included in stage 2 and ancillary analyses**

| Study          | Trait                    | Men  |        |       |        |       |        |                      |                         | Women |        |       |        |       |        |                      |                         |
|----------------|--------------------------|------|--------|-------|--------|-------|--------|----------------------|-------------------------|-------|--------|-------|--------|-------|--------|----------------------|-------------------------|
|                |                          | N    | Mean   | SD    | Median | Min   | Max    | Correlation with BMI | Correlation with height | N     | Mean   | SD    | Median | Min   | Max    | Correlation with BMI | Correlation with height |
|                | WHR (cm/cm)              | 130  | 0.93   | 0.06  | 0.93   | 0.80  | 1.07   | 0.60                 | 0.13                    | 159   | 0.82   | 0.07  | 0.82   | 0.68  | 1.19   | 0.40                 | 0.10                    |
| LifeLines      | Age (yrs)                | 3477 | 48.1   | 11.3  | 47.8   | 19.6  | 87.6   | 0.16                 | -0.25                   | 4639  | 44.0   | 11.1  | 47.2   | 18.1  | 89.0   | 0.21                 | -0.28                   |
|                | BMI (kg/m <sup>2</sup> ) | 3477 | 26.6   | 3.6   | 26.2   | 14.4  | 48.9   | 1.00                 | -0.09                   | 4639  | 25.7   | 4.7   | 25.1   | 13.9  | 51.8   | 1.00                 | -0.17                   |
|                | Weight (kg)              | 3477 | 88.3   | 13.2  | 87.0   | 49.5  | 165.0  | 0.83                 | 0.43                    | 4639  | 73.9   | 13.6  | 72.0   | 42.5  | 152.0  | 0.88                 | 0.27                    |
|                | Height (m)               | 3477 | 1.82   | 0.07  | 1.82   | 1.58  | 2.08   | -0.09                | 1.00                    | 4639  | 1.70   | 0.06  | 1.69   | 1.45  | 1.93   | -0.17                | 1.00                    |
|                | WC (cm)                  | 3477 | 96.4   | 10.7  | 96.0   | 65.0  | 158.0  | 0.84                 | 0.08                    | 4638  | 86.8   | 12.2  | 86.5   | 58.0  | 146.0  | 0.83                 | -0.02                   |
|                | Hip (cm)                 | 3477 | 100.2  | 7.4   | 100.0  | 73.0  | 163.0  | 0.70                 | 0.30                    | 4637  | 100.7  | 10.3  | 100.0  | 69.0  | 181.0  | 0.84                 | 0.08                    |
|                | WHR (cm/cm)              | 3477 | 1.0    | 0.1   | 1.0    | 0.6   | 1.3    | 0.58                 | -0.15                   | 4637  | 0.9    | 0.1   | 0.9    | 0.5   | 1.3    | 0.39                 | -0.11                   |
| PLCO2 controls | Age (yrs)                | 649  | 63.60  | 5.20  | 64.00  | 55.00 | 74.00  | -0.16                | -0.08                   | 544   | 63.60  | 5.20  | 64.00  | 55.00 | 74.00  | -0.06                | -0.07                   |
|                | BMI (kg/m <sup>2</sup> ) | 645  | 27.00  | 3.90  | 26.50  | 17.20 | 40.50  | 1.00                 | 0.00                    | 544   | 26.40  | 5.00  | 25.70  | 16.70 | 50.30  | 1.00                 | -0.08                   |
|                | Weight (kg)              | 645  | 86.60  | 14.00 | 83.90  | 52.20 | 145.10 | 0.89                 | 0.45                    | 544   | 70.30  | 14.20 | 68.00  | 41.30 | 149.70 | 0.92                 | 0.31                    |
|                | Height (m)               | 649  | 1.78   | 0.07  | 1.78   | 1.63  | 1.98   | 0.00                 | 1.00                    | 544   | 1.63   | 0.06  | 1.63   | 1.45  | 1.85   | -0.08                | 1.00                    |
|                | WC (cm)                  | -    | -      | -     | -      | -     | -      | -                    | -                       | -     | -      | -     | -      | -     | -      | -                    | -                       |
|                | Hip (cm)                 | -    | -      | -     | -      | -     | -      | -                    | -                       | -     | -      | -     | -      | -     | -      | -                    | -                       |
|                | WHR (cm/cm)              | -    | -      | -     | -      | -     | -      | -                    | -                       | -     | -      | -     | -      | -     | -      | -                    | -                       |
| PLCO2 cases    | Age (yrs)                | 2042 | 64.20  | 5.10  | 64.00  | 55.00 | 74.00  | -0.08                | -0.08                   | 934   | 64.00  | 5.30  | 64.00  | 55.00 | 74.00  | -0.02                | -0.11                   |
|                | BMI (kg/m <sup>2</sup> ) | 2040 | 27.50  | 4.20  | 26.90  | 15.90 | 50.20  | 1.00                 | -0.02                   | 933   | 26.70  | 5.10  | 25.90  | 16.50 | 52.20  | 1.00                 | -0.07                   |
|                | Weight (kg)              | 2040 | 87.60  | 14.80 | 85.30  | 52.20 | 176.90 | 0.90                 | 0.42                    | 933   | 71.00  | 14.50 | 68.00  | 40.80 | 137.90 | 0.91                 | 0.33                    |
|                | Height (m)               | 2042 | 1.79   | 0.07  | 1.78   | 1.55  | 2.11   | -0.02                | 1.00                    | 934   | 1.63   | 0.06  | 1.63   | 1.24  | 1.93   | -0.07                | 1.00                    |
|                | WC (cm)                  | -    | -      | -     | -      | -     | -      | -                    | -                       | -     | -      | -     | -      | -     | -      | -                    | -                       |
|                | Hip (cm)                 | -    | -      | -     | -      | -     | -      | -                    | -                       | -     | -      | -     | -      | -     | -      | -                    | -                       |
|                | WHR (cm/cm)              | -    | -      | -     | -      | -     | -      | -                    | -                       | -     | -      | -     | -      | -     | -      | -                    | -                       |
| PREVEND        | Age (yrs)                | 1870 | 50.93  | 12.77 | 50.00  | 28.00 | 75.00  | 0.20                 | -0.34                   | 1752  | 48.19  | 12.03 | 47.00  | 28.00 | 75.00  | 0.29                 | -0.37                   |
|                | BMI (kg/m <sup>2</sup> ) | 1870 | 26.41  | 3.68  | 26.02  | 17.21 | 44.66  | 1.00                 | -0.18                   | 1752  | 25.82  | 4.77  | 24.99  | 17.06 | 53.73  | 1.00                 | -0.22                   |
|                | Weight (kg)              | 1870 | 85.11  | 12.54 | 84.00  | 49.00 | 146.00 | 0.85                 | 0.36                    | 1752  | 72.31  | 13.18 | 70.00  | 44.90 | 144.50 | 0.91                 | 0.20                    |
|                | Height (m)               | 1870 | 1.80   | 0.07  | 1.79   | 1.58  | 2.07   | -0.18                | 1.00                    | 1752  | 1.68   | 0.07  | 1.68   | 1.45  | 1.93   | -0.22                | 1.00                    |
|                | WC (cm)                  | 1868 | 94.50  | 11.17 | 94.00  | 31.00 | 141.50 | 0.84                 | -0.02                   | 1752  | 83.33  | 12.99 | 81.50  | 57.00 | 150.00 | 0.86                 | -0.08                   |
|                | Hip (cm)                 | 1868 | 100.11 | 6.70  | 100.00 | 70.00 | 128.00 | 0.78                 | 0.23                    | 1752  | 100.95 | 10.35 | 100.00 | 68.00 | 170.00 | 0.86                 | 0.02                    |

Supplementary Table 4. Study-specific descriptive statistics for studies included in stage 2 and ancillary analyses

| Study  | Trait                    | Men  |        |       |        |       |        |                      |                         | Women |        |       |        |       |        |                      |                         |
|--------|--------------------------|------|--------|-------|--------|-------|--------|----------------------|-------------------------|-------|--------|-------|--------|-------|--------|----------------------|-------------------------|
|        |                          | N    | Mean   | SD    | Median | Min   | Max    | Correlation with BMI | Correlation with height | N     | Mean   | SD    | Median | Min   | Max    | Correlation with BMI | Correlation with height |
|        | WHR (cm/cm)              | 1868 | 0.94   | 0.07  | 0.94   | 0.27  | 1.36   | 0.59                 | -0.23                   | 1752  | 0.82   | 0.08  | 0.82   | 0.45  | 1.39   | 0.45                 | -0.15                   |
| QIMR   | Age (yrs)                | 1646 | 43.23  | 15.78 | 42.00  | 18.00 | 91.00  | 0.28                 | -0.17                   | 2307  | 43.03  | 15.14 | 41.00  | 18.00 | 90.00  | 0.29                 | -0.18                   |
|        | BMI (kg/m <sup>2</sup> ) | 1646 | 25.75  | 3.81  | 25.38  | 16.60 | 60.93  | 1.00                 | -0.15                   | 2307  | 24.86  | 5.04  | 23.73  | 14.17 | 64.52  | 1.00                 | -0.16                   |
|        | Weight (kg)              | 1646 | 81.40  | 12.71 | 80.00  | 50.00 | 161.00 | 0.86                 | 0.37                    | 2307  | 66.28  | 13.63 | 63.50  | 34.02 | 160.00 | 0.91                 | 0.25                    |
|        | Height (m)               | 1646 | 1.78   | 0.07  | 1.78   | 1.45  | 2.08   | -0.15                | 1.00                    | 2307  | 1.63   | 0.07  | 1.63   | 1.32  | 1.96   | -0.16                | 1.00                    |
|        | WC (cm)                  | -    | -      | -     | -      | -     | -      | -                    | -                       | -     | -      | -     | -      | -     | -      | -                    | -                       |
|        | Hip (cm)                 | -    | -      | -     | -      | -     | -      | -                    | -                       | -     | -      | -     | -      | -     | -      | -                    | -                       |
|        | WHR (cm/cm)              | -    | -      | -     | -      | -     | -      | -                    | -                       | -     | -      | -     | -      | -     | -      | -                    | -                       |
| RS2    | Age (yrs)                | 876  | 64.38  | 7.59  | 61.81  | 55.14 | 93.95  | -0.13                | -0.21                   | 1035  | 64.71  | 8.23  | 61.73  | 55.12 | 95.33  | -0.02                | -0.30                   |
|        | BMI (kg/m <sup>2</sup> ) | 876  | 26.83  | 3.29  | 26.70  | 16.78 | 40.52  | 1.00                 | -0.10                   | 1035  | 27.48  | 4.47  | 26.78  | 16.66 | 50.12  | 1.00                 | -0.06                   |
|        | Weight (kg)              | 876  | 85.05  | 11.36 | 82.00  | 54.00 | 126.80 | 0.84                 | 0.45                    | 1035  | 72.77  | 12.80 | 71.00  | 44.10 | 150.00 | 0.90                 | 0.38                    |
|        | Height (m)               | 876  | 1.76   | 0.06  | 1.76   | 1.57  | 2.03   | -0.10                | 1.00                    | 1035  | 1.63   | 0.06  | 1.63   | 1.42  | 1.90   | -0.06                | 1.00                    |
|        | WC (cm)                  | 876  | 99.00  | 10.18 | 98.60  | 70.00 | 198.60 | 0.82                 | 0.09                    | 1035  | 89.84  | 11.56 | 88.90  | 62.00 | 145.00 | 0.86                 | 0.10                    |
|        | Hip (cm)                 | 876  | 101.80 | 5.87  | 101.30 | 86.50 | 163.20 | 0.75                 | 0.25                    | 1035  | 104.08 | 8.61  | 103.00 | 82.00 | 154.00 | 0.86                 | 0.20                    |
|        | WHR (cm/cm)              | 876  | 0.97   | 0.07  | 0.97   | 0.58  | 1.95   | 0.54                 | -0.08                   | 1035  | 0.86   | 0.08  | 0.86   | 0.60  | 1.18   | 0.45                 | -0.05                   |
| RS3    | Age (yrs)                | 877  | 55.93  | 5.43  | 56.10  | 45.46 | 84.15  | 0.08                 | -0.26                   | 1129  | 56.20  | 6.03  | 56.42  | 45.75 | 97.22  | 0.07                 | -0.23                   |
|        | BMI (kg/m <sup>2</sup> ) | 877  | 28.03  | 4.07  | 27.31  | 18.42 | 46.68  | 1.00                 | -0.07                   | 1129  | 27.48  | 5.06  | 26.55  | 14.02 | 56.87  | 1.00                 | -0.10                   |
|        | Weight (kg)              | 877  | 89.76  | 14.33 | 87.70  | 58.30 | 153.50 | 0.88                 | 0.41                    | 1129  | 74.90  | 14.28 | 72.80  | 35.00 | 158.60 | 0.92                 | 0.29                    |
|        | Height (m)               | 877  | 1.79   | 0.07  | 1.79   | 1.61  | 1.98   | -0.07                | 1.00                    | 1129  | 1.65   | 0.06  | 1.65   | 1.47  | 1.85   | -0.10                | 1.00                    |
|        | WC (cm)                  | 842  | 99.98  | 11.71 | 98.50  | 65.20 | 174.00 | 0.85                 | 0.14                    | 1085  | 89.59  | 12.87 | 88.10  | 62.10 | 160.00 | 0.88                 | 0.05                    |
|        | Hip (cm)                 | 842  | 107.50 | 7.33  | 107.00 | 86.00 | 144.50 | 0.76                 | 0.31                    | 1085  | 107.80 | 10.24 | 106.30 | 79.80 | 161.10 | 0.89                 | 0.13                    |
|        | WHR (cm/cm)              | 842  | 0.93   | 0.08  | 0.92   | 0.66  | 2.02   | 0.54                 | -0.05                   | 1085  | 0.83   | 0.07  | 0.83   | 0.66  | 1.54   | 0.45                 | -0.06                   |
| TRAILS | Age (yrs)                | 539  | 19.2   | 0.5   | 19.2   | 18.2  | 20.7   | 0.04                 | -0.09                   | 602   | 19.1   | 0.6   | 19.1   | 18.2  | 20.8   | 0.09                 | -0.07                   |
|        | BMI (kg/m <sup>2</sup> ) | 539  | 22.6   | 3.8   | 21.9   | 15.6  | 43.2   | 1.00                 | -0.04                   | 602   | 23.0   | 3.7   | 22.4   | 15.9  | 45.6   | 1.00                 | -0.15                   |
|        | Weight (kg)              | 539  | 76.3   | 14.0  | 73.5   | 48.4  | 138.0  | 0.84                 | 0.46                    | 602   | 66.5   | 10.9  | 65.5   | 42.5  | 125.0  | 0.84                 | 0.35                    |
|        | Height (m)               | 539  | 1.84   | 0.07  | 1.84   | 1.65  | 2.06   | -0.04                | 1.00                    | 602   | 1.70   | 0.07  | 1.71   | 1.42  | 1.92   | -0.15                | 1.00                    |
|        | WC (cm)                  | 537  | 81.8   | 9.8   | 79.5   | 64.5  | 130.8  | 0.77                 | 0.23                    | 602   | 75.3   | 8.8   | 73.6   | 46.0  | 130.0  | 0.78                 | 0.09                    |
|        | Hip (cm)                 | 537  | 99.4   | 8.4   | 98.0   | 75.5  | 138.5  | 0.74                 | 0.33                    | 602   | 99.9   | 8.5   | 99.3   | 51.0  | 133.8  | 0.75                 | 0.18                    |

Supplementary Table 4. Study-specific descriptive statistics for studies included in stage 2 and ancillary analyses

| Study    | Trait                    | Men  |        |       |        |       |        |                      |                         | Women |        |       |        |       |        |                      |                         |
|----------|--------------------------|------|--------|-------|--------|-------|--------|----------------------|-------------------------|-------|--------|-------|--------|-------|--------|----------------------|-------------------------|
|          |                          | N    | Mean   | SD    | Median | Min   | Max    | Correlation with BMI | Correlation with height | N     | Mean   | SD    | Median | Min   | Max    | Correlation with BMI | Correlation with height |
|          | WHR (cm/cm)              | 537  | 0.8    | 0.1   | 0.8    | 0.7   | 1.1    | 0.35                 | -0.05                   | 602   | 0.8    | 0.1   | 0.7    | 0.6   | 1.0    | 0.29                 | -0.10                   |
| TWINGENE | Age (yrs)                | 4594 | 65.51  | 8.06  | 65.20  | 47.57 | 93.30  | -0.05                | -0.29                   | 5146  | 64.64  | 8.21  | 64.11  | 47.38 | 93.87  | 0.04                 | -0.32                   |
|          | BMI (kg/m <sup>2</sup> ) | 4410 | 26.33  | 3.53  | 25.93  | 15.43 | 57.82  | 1.00                 | -0.07                   | 4886  | 25.80  | 4.32  | 25.13  | 15.02 | 66.99  | 1.00                 | -0.12                   |
|          | Weight (kg)              | 4410 | 81.90  | 12.20 | 80.50  | 50.00 | 179.10 | 0.86                 | 0.45                    | 4886  | 68.78  | 12.02 | 67.10  | 37.60 | 171.50 | 0.90                 | 0.32                    |
|          | Height (m)               | 4494 | 1.76   | 0.07  | 1.76   | 1.43  | 2.05   | -0.07                | 1.00                    | 5007  | 1.63   | 0.06  | 1.63   | 1.37  | 1.93   | -0.12                | 1.00                    |
|          | WC (cm)                  | 4536 | 97.24  | 10.21 | 97.00  | 52.50 | 193.00 | 0.82                 | 0.14                    | 5068  | 86.92  | 11.59 | 86.00  | 40.00 | 199.00 | 0.83                 | 0.06                    |
|          | Hip (cm)                 | 4523 | 103.22 | 7.97  | 103.00 | 41.00 | 197.00 | 0.64                 | 0.25                    | 5063  | 103.42 | 9.40  | 102.30 | 38.00 | 172.00 | 0.83                 | 0.13                    |
|          | WHR (cm/cm)              | 4517 | 0.94   | 0.09  | 0.94   | 0.49  | 2.61   | 0.36                 | -0.05                   | 5056  | 0.84   | 0.08  | 0.84   | 0.45  | 1.88   | 0.37                 | -0.04                   |
| UKBS2    | Age (yrs)                | 684  | 45.09  | 11.92 | 46     | 17    | 69     | 0.05                 | -0.14                   | 648   | 42.5   | 12.3  | 43.0   | 17.0  | 69.0   | 0.09                 | -0.17                   |
|          | BMI (kg/m <sup>2</sup> ) | 684  | 26.45  | 3.63  | 26.2   | 18.01 | 44.44  | 1                    | -0.07                   | 648   | 26.0   | 4.5   | 25.1   | 16.6  | 42.9   | 1                    | -0.17                   |
|          | Weight (kg)              | 684  | 83.99  | 12.81 | 82.73  | 48.18 | 152.7  | 0.86                 | 0.43                    | 648   | 70.4   | 12.6  | 68.2   | 50.0  | 117.7  | 0.9                  | 0.27                    |
|          | Height (m)               | 684  | 1.78   | 0.07  | 1.78   | 1.52  | 2.08   | -0.08                | 1                       | 648   | 1.6    | 0.064 | 1.7    | 1.4   | 1.8    | -0.17                | 1                       |
|          | WC (cm)                  | -    | -      | -     | -      | -     | -      | -                    | -                       | -     | -      | -     | -      | -     | -      | -                    | -                       |
|          | Hip (cm)                 | -    | -      | -     | -      | -     | -      | -                    | -                       | -     | -      | -     | -      | -     | -      | -                    | -                       |
|          | WHR (cm/cm)              | -    | -      | -     | -      | -     | -      | -                    | -                       | -     | -      | -     | -      | -     | -      | -                    | -                       |



Supplementary Table 4. Study-specific descriptive statistics for studies included in stage 2 and ancillary analyses

| Study                                         | Trait                    | Men  |       |       |        |       |        |                      |                         | Women |       |       |        |       |        |                      |                         |
|-----------------------------------------------|--------------------------|------|-------|-------|--------|-------|--------|----------------------|-------------------------|-------|-------|-------|--------|-------|--------|----------------------|-------------------------|
|                                               |                          | N    | Mean  | SD    | Median | Min   | Max    | Correlation with BMI | Correlation with height | N     | Mean  | SD    | Median | Min   | Max    | Correlation with BMI | Correlation with height |
| <b>Stage 2 - Metabochip:</b>                  |                          |      |       |       |        |       |        |                      |                         |       |       |       |        |       |        |                      |                         |
| AMC-PAS                                       | Age (yrs)                | 368  | 43.50 | 5.14  | 44.50  | 24.00 | 50.00  | -0.05                | -0.06                   | 122   | 42.78 | 5.62  | 44.00  | 25.00 | 50.00  | 0.09                 | -0.09                   |
|                                               | BMI (kg/m <sup>2</sup> ) | 368  | 27.13 | 3.81  | 26.70  | 18.50 | 40.60  | 1.00                 | 0.08                    | 122   | 26.19 | 5.09  | 25.30  | 17.40 | 41.20  | 1.00                 | -0.09                   |
|                                               | Weight (kg)              | 368  | 88.09 | 14.84 | 86.00  | 50.00 | 150.00 | 0.88                 | 0.54                    | 122   | 73.08 | 14.85 | 70.00  | 49.00 | 122.00 | 0.93                 | 0.29                    |
|                                               | Height (m)               | 368  | 1.80  | 0.07  | 1.80   | 1.59  | 2.04   | 0.08                 | 1.00                    | 122   | 1.67  | 0.06  | 1.67   | 1.50  | 1.83   | -0.09                | 1.00                    |
|                                               | WC (cm)                  | -    | -     | -     | -      | -     | -      | -                    | -                       | -     | -     | -     | -      | -     | -      | -                    | -                       |
|                                               | Hip (cm)                 | -    | -     | -     | -      | -     | -      | -                    | -                       | -     | -     | -     | -      | -     | -      | -                    | -                       |
|                                               | WHR (cm/cm)              | -    | -     | -     | -      | -     | -      | -                    | -                       | -     | -     | -     | -      | -     | -      | -                    | -                       |
| CARDIOGENICS controls                         | Age (yrs)                | 148  | 53.90 | 7.10  | 55.00  | 42.00 | 65.00  | -0.01                | -0.12                   | 227   | 53.20 | 7.00  | 54.00  | 41.00 | 65.00  | 0.11                 | -0.07                   |
|                                               | BMI (kg/m <sup>2</sup> ) | 148  | 25.90 | 3.40  | 25.30  | 19.00 | 37.20  | 1.00                 | -0.24                   | 227   | 25.60 | 3.90  | 25.10  | 18.10 | 39.20  | 1.00                 | -0.07                   |
|                                               | Weight (kg)              | 148  | 82.20 | 10.60 | 81.00  | 57.00 | 114.00 | 0.87                 | 0.27                    | 227   | 69.30 | 11.50 | 68.00  | 53.00 | 127.00 | 0.89                 | 0.37                    |
|                                               | Height (m)               | 148  | 1.78  | 0.06  | 1.78   | 1.63  | 1.98   | -0.24                | 1.00                    | 227   | 1.64  | 0.06  | 1.65   | 1.50  | 1.80   | -0.07                | 1.00                    |
|                                               | WC (cm)                  | -    | -     | -     | -      | -     | -      | -                    | -                       | -     | -     | -     | -      | -     | -      | -                    | -                       |
|                                               | Hip (cm)                 | -    | -     | -     | -      | -     | -      | -                    | -                       | -     | -     | -     | -      | -     | -      | -                    | -                       |
|                                               | WHR (cm/cm)              | -    | -     | -     | -      | -     | -      | -                    | -                       | -     | -     | -     | -      | -     | -      | -                    | -                       |
| CARDIOGENICS cases                            | Age (yrs)                | 328  | 56.50 | 8.70  | 57.50  | 26.00 | 87.00  | -0.10                | -0.19                   | 51    | 58.70 | 8.70  | 59.00  | 39.00 | 79.00  | -0.23                | -0.16                   |
|                                               | BMI (kg/m <sup>2</sup> ) | 328  | 28.50 | 4.20  | 27.80  | 17.10 | 42.20  | 1.00                 | 0.02                    | 51    | 27.60 | 5.90  | 26.70  | 17.70 | 43.80  | 1.00                 | 0.20                    |
|                                               | Weight (kg)              | 328  | 88.27 | 14.63 | 86.40  | 36.00 | 133.00 | 0.87                 | 0.50                    | 51    | 73.59 | 17.89 | 70.00  | 43.00 | 122.00 | 0.94                 | 0.51                    |
|                                               | Height (m)               | 328  | 1.80  | 0.10  | 1.80   | 1.50  | 2.00   | 0.02                 | 1.00                    | 51    | 1.60  | 0.10  | 1.60   | 1.50  | 1.80   | 0.20                 | 1.00                    |
|                                               | WC (cm)                  | -    | -     | -     | -      | -     | -      | -                    | -                       | -     | -     | -     | -      | -     | -      | -                    | -                       |
|                                               | Hip (cm)                 | -    | -     | -     | -      | -     | -      | -                    | -                       | -     | -     | -     | -      | -     | -      | -                    | -                       |
|                                               | WHR (cm/cm)              | -    | -     | -     | -      | -     | -      | -                    | -                       | -     | -     | -     | -      | -     | -      | -                    | -                       |
| D2D2007.DPS.DRSEXTRA.FUSION2.MET SIM controls | Age (yrs)                | 3394 | 58.00 | 8.08  | 58.00  | 41.30 | 78.46  | 0.05                 | -0.22                   | 2714  | 59.59 | 8.44  | 60.02  | 40.09 | 78.70  | 0.07                 | -0.28                   |
|                                               | BMI (kg/m <sup>2</sup> ) | 3394 | 26.77 | 3.60  | 26.43  | 16.48 | 48.95  | 1.00                 | -0.01                   | 2714  | 27.37 | 5.01  | 26.67  | 15.96 | 61.34  | 1.00                 | -0.13                   |
|                                               | Weight (kg)              | 3394 | 82.62 | 12.75 | 81.40  | 45.00 | 160.00 | 0.85                 | 0.48                    | 2714  | 71.55 | 13.60 | 69.70  | 41.90 | 158.60 | 0.90                 | 0.27                    |

Supplementary Table 4. Study-specific descriptive statistics for studies included in stage 2 and ancillary analyses

| Study                                         | Trait                    | Men      |            |           |        |           |            |                      |                         | Women    |            |           |        |           |            |                      |                         |
|-----------------------------------------------|--------------------------|----------|------------|-----------|--------|-----------|------------|----------------------|-------------------------|----------|------------|-----------|--------|-----------|------------|----------------------|-------------------------|
|                                               |                          | N        | Mean       | SD        | Median | Min       | Max        | Correlation with BMI | Correlation with height | N        | Mean       | SD        | Median | Min       | Max        | Correlation with BMI | Correlation with height |
|                                               | Height (m)               | 339<br>4 | 1.76       | 0.06      | 1.75   | 1.45      | 1.98       | -0.01                | 1.00                    | 271<br>4 | 1.62       | 0.06      | 1.62   | 1.40      | 1.83       | -0.13                | 1.00                    |
|                                               | WC (cm)                  | 339<br>1 | 96.75      | 10.3<br>7 | 96.00  | 63.0<br>0 | 155.0<br>0 | 0.86                 | 0.19                    | 270<br>6 | 88.54      | 12.4<br>9 | 87.00  | 58.0<br>0 | 150.0<br>0 | 0.88                 | 0.05                    |
|                                               | Hip (cm)                 | 339<br>1 | 100.0<br>9 | 6.80      | 99.75  | 72.0<br>0 | 160.0<br>0 | 0.77                 | 0.34                    | 270<br>8 | 102.8<br>8 | 9.85      | 101.50 | 72.0<br>0 | 161.0<br>0 | 0.89                 | 0.11                    |
|                                               | WHR (cm/cm)              | 339<br>1 | 0.97       | 0.06      | 0.96   | 0.78      | 1.89       | 0.61                 | -0.02                   | 270<br>5 | 0.86       | 0.07      | 0.86   | 0.67      | 1.29       | 0.53                 | -0.03                   |
| D2D2007.DPS.DRSEXTRA.FUSION2.MET<br>SIM cases | Age (yrs)                | 203<br>3 | 60.50      | 7.74      | 61.00  | 28.0<br>0 | 82.00      | -0.13                | -0.19                   | 721      | 61.72      | 7.95      | 62.00  | 34.3<br>6 | 89.00      | -0.12                | -0.19                   |
|                                               | BMI (kg/m <sup>2</sup> ) | 203<br>3 | 30.13      | 5.05      | 29.41  | 18.2<br>9 | 55.54      | 1.00                 | 0.01                    | 721      | 31.83      | 5.81      | 31.20  | 17.8<br>5 | 53.45      | 1.00                 | 0.00                    |
|                                               | Weight (kg)              | 203<br>3 | 92.25      | 16.8<br>4 | 90.00  | 42.2<br>0 | 174.0<br>0 | 0.91                 | 0.40                    | 721      | 82.36      | 16.0<br>6 | 80.00  | 48.0<br>0 | 137.4<br>0 | 0.93                 | 0.34                    |
|                                               | Height (m)               | 203<br>3 | 1.75       | 0.06      | 1.75   | 1.39      | 1.96       | 0.01                 | 1.00                    | 721      | 1.61       | 0.06      | 1.61   | 1.45      | 1.77       | 0.00                 | 1.00                    |
|                                               | WC (cm)                  | 203<br>2 | 106.7<br>4 | 13.1<br>1 | 105.00 | 73.0<br>0 | 167.0<br>0 | 0.90                 | 0.17                    | 719      | 100.5<br>3 | 14.0<br>4 | 99.50  | 62.0<br>0 | 145.0<br>0 | 0.87                 | 0.15                    |
|                                               | Hip (cm)                 | 203<br>3 | 105.2<br>4 | 9.13      | 104.00 | 74.0<br>0 | 164.0<br>0 | 0.84                 | 0.25                    | 719      | 110.8<br>1 | 11.6<br>0 | 109.50 | 84.0<br>0 | 152.0<br>0 | 0.90                 | 0.15                    |
|                                               | WHR (cm/cm)              | 203<br>2 | 1.01       | 0.07      | 1.01   | 0.72      | 1.44       | 0.59                 | 0.02                    | 719      | 0.91       | 0.07      | 0.90   | 0.61      | 1.18       | 0.37                 | 0.04                    |
| DILGOM                                        | Age (yrs)                | 179<br>7 | 53.30      | 13.5<br>0 | 55.00  | 25.0<br>0 | 74.00      | 0.15                 | -0.32                   | 213<br>9 | 51.70      | 13.6<br>0 | 53.00  | 25.0<br>0 | 74.00      | 0.24                 | -0.38                   |
|                                               | BMI (kg/m <sup>2</sup> ) | 179<br>1 | 27.20      | 4.20      | 26.70  | 15.8<br>0 | 63.10      | 1.00                 | -0.06                   | 213<br>9 | 26.90      | 5.40      | 25.80  | 16.0<br>0 | 52.50      | 1.00                 | -0.18                   |
|                                               | Weight (kg)              | 179<br>1 | 84.00      | 14.1<br>0 | 82.20  | 50.1<br>0 | 192.6<br>0 | 0.89                 | 0.41                    | 213<br>9 | 70.80      | 14.2<br>0 | 68.50  | 38.5<br>0 | 144.5<br>0 | 0.92                 | 0.20                    |
|                                               | Height (m)               | 179<br>7 | 1.76       | 0.07      | 1.75   | 1.52      | 2.01       | -0.06                | 1.00                    | 213<br>8 | 1.63       | 0.06      | 1.63   | 1.38      | 1.84       | -0.18                | 1.00                    |
|                                               | WC (cm)                  | 178<br>7 | 96.80      | 12.0<br>0 | 95.50  | 64.0<br>0 | 172.0<br>0 | 0.91                 | 0.07                    | 212<br>2 | 87.00      | 13.5<br>0 | 85.00  | 58.0<br>0 | 143.0<br>0 | 0.92                 | -0.03                   |
|                                               | Hip (cm)                 | 179<br>0 | 100.5<br>0 | 7.60      | 100.00 | 80.5<br>0 | 161.0<br>0 | 0.85                 | 0.25                    | 212<br>2 | 102.0<br>0 | 10.8<br>0 | 100.50 | 75.5<br>0 | 162.0<br>0 | 0.92                 | 0.02                    |
|                                               | WHR (cm/cm)              | 178<br>4 | 1.00       | 0.10      | 1.00   | 0.80      | 1.20       | 0.65                 | -0.15                   | 211<br>6 | 0.90       | 0.10      | 0.80   | 0.70      | 1.10       | 0.56                 | -0.09                   |
| GoDARTS controls                              | Age (yrs)                | 191<br>8 | 60.20      | 11.0<br>9 | 61.00  | 36.0<br>0 | 79.00      | 0.01                 | -0.26                   | 178<br>9 | 57.99      | 11.4<br>5 | 57.00  | 36.0<br>0 | 79.00      | 0.01                 | -0.24                   |
|                                               | BMI (kg/m <sup>2</sup> ) | 191<br>8 | 27.26      | 3.97      | 26.90  | 16.2<br>0 | 54.90      | 1.00                 | -0.08                   | 178<br>8 | 26.81      | 5.02      | 26.00  | 14.3<br>0 | 51.60      | 1.00                 | -0.15                   |
|                                               | Weight (kg)              | 191<br>8 | 84.63      | 13.3<br>4 | 83.80  | 46.9<br>0 | 168.0<br>0 | 0.88                 | 0.40                    | 178<br>8 | 70.46      | 13.5<br>0 | 68.55  | 33.0<br>0 | 125.6<br>0 | 0.91                 | 0.27                    |
|                                               | Height (m)               | 191<br>8 | 1.76       | 0.07      | 1.76   | 1.51      | 1.98       | -0.08                | 1.00                    | 178<br>9 | 1.62       | 0.07      | 1.62   | 1.43      | 1.85       | -0.15                | 1.00                    |
|                                               | WC (cm)                  | 191<br>7 | 98.49      | 10.7<br>3 | 98.00  | 69.0<br>0 | 172.0<br>0 | 0.86                 | 0.11                    | 178<br>7 | 86.69      | 12.3<br>0 | 86.00  | 61.0<br>0 | 153.0<br>0 | 0.84                 | 0.02                    |

Supplementary Table 4. Study-specific descriptive statistics for studies included in stage 2 and ancillary analyses

| Study          | Trait                    | Men  |        |       |        |       |        |                      |                         | Women |        |       |        |       |        |                      |                         |
|----------------|--------------------------|------|--------|-------|--------|-------|--------|----------------------|-------------------------|-------|--------|-------|--------|-------|--------|----------------------|-------------------------|
|                |                          | N    | Mean   | SD    | Median | Min   | Max    | Correlation with BMI | Correlation with height | N     | Mean   | SD    | Median | Min   | Max    | Correlation with BMI | Correlation with height |
| GoDARTS cases  | Hip (cm)                 | -    | -      | -     | -      | -     | -      | -                    | -                       | -     | -      | -     | -      | -     | -      | -                    | -                       |
|                | WHR (cm/cm)              | -    | -      | -     | -      | -     | -      | -                    | -                       | -     | -      | -     | -      | -     | -      | -                    | -                       |
|                | Age (yrs)                | 1929 | 63.19  | 9.49  | 64.00  | 36.00 | 88.00  | -0.26                | -0.18                   | 1351  | 64.02  | 9.76  | 66.00  | 36.00 | 89.00  | -0.33                | -0.18                   |
|                | BMI (kg/m <sup>2</sup> ) | 1924 | 31.12  | 5.64  | 30.30  | 16.20 | 61.50  | 1.00                 | -0.06                   | 1346  | 32.93  | 7.05  | 32.00  | 16.40 | 62.30  | 1.00                 | 0.00                    |
|                | Weight (kg)              | 1925 | 94.31  | 18.16 | 91.70  | 46.90 | 177.80 | 0.91                 | 0.35                    | 1347  | 84.58  | 19.33 | 82.58  | 42.20 | 164.00 | 0.94                 | 0.35                    |
|                | Height (m)               | 1928 | 1.74   | 0.07  | 1.74   | 1.50  | 2.00   | -0.06                | 1.00                    | 1348  | 1.60   | 0.06  | 1.60   | 1.40  | 1.86   | 0.00                 | 1.00                    |
|                | WC (cm)                  | 1750 | 108.51 | 13.36 | 107.00 | 74.00 | 164.00 | 0.89                 | 0.13                    | 1215  | 103.67 | 15.16 | 103.00 | 62.00 | 177.00 | 0.84                 | 0.16                    |
| Hip (cm)       | -                        | -    | -      | -     | -      | -     | -      | -                    | -                       | -     | -      | -     | -      | -     | -      | -                    |                         |
| WHR (cm/cm)    | -                        | -    | -      | -     | -      | -     | -      | -                    | -                       | -     | -      | -     | -      | -     | -      | -                    |                         |
| EGCUT controls | Age (yrs)                | 341  | 54.4   | 11.0  | 55.0   | 35.0  | 86.0   | 0.21                 | -0.30                   | 601   | 50.0   | 10.1  | 49.0   | 34.0  | 93.0   | 0.23                 | -0.33                   |
|                | BMI (kg/m <sup>2</sup> ) | 340  | 22.8   | 2.5   | 22.7   | 16.7  | 29.4   | 1.00                 | -0.12                   | 600   | 22.1   | 2.5   | 22.1   | 14.6  | 35.5   | 1.00                 | -0.21                   |
|                | Weight (kg)              | 340  | 70.9   | 8.5   | 70.0   | 48.0  | 95.0   | 0.81                 | 0.48                    | 600   | 59.5   | 7.6   | 60.0   | 41.0  | 99.0   | 0.76                 | 0.46                    |
|                | Height (m)               | 340  | 1.76   | 0.07  | 1.76   | 1.49  | 1.97   | -0.12                | 1.00                    | 600   | 1.64   | 0.06  | 1.64   | 1.41  | 1.82   | -0.21                | 1.00                    |
|                | WC (cm)                  | 340  | 84.1   | 6.8   | 85.0   | 54.0  | 110.0  | 0.66                 | 0.11                    | 600   | 72.8   | 5.8   | 73.0   | 52.0  | 105.0  | 0.45                 | 0.21                    |
|                | Hip (cm)                 | 340  | 94.9   | 7.7   | 96.0   | 57.0  | 115.0  | 0.55                 | 0.26                    | 600   | 95.1   | 7.2   | 95.0   | 64.0  | 122.0  | 0.37                 | 0.19                    |
|                | WHR (cm/cm)              | 340  | 0.9    | 0.1   | 0.9    | 0.7   | 1.2    | 0.15                 | -0.14                   | 600   | 0.8    | 0.1   | 0.8    | 0.6   | 1.2    | 0.08                 | 0.00                    |
| EGCUT CAD      | Age (yrs)                | 346  | 62.5   | 11.6  | 62.0   | 22.0  | 87.0   | 0.04                 | -0.24                   | 354   | 67.1   | 9.2   | 69.0   | 30.0  | 86.0   | -0.36                | -0.26                   |
|                | BMI (kg/m <sup>2</sup> ) | 346  | 28.2   | 4.4   | 28.0   | 17.2  | 43.9   | 1.00                 | -0.07                   | 354   | 29.3   | 5.5   | 28.6   | 17.5  | 51.0   | 1.00                 | 0.06                    |
|                | Weight (kg)              | 346  | 86.8   | 15.6  | 85.0   | 51.0  | 137.0  | 0.92                 | 0.32                    | 354   | 76.0   | 15.0  | 74.0   | 42.0  | 129.0  | 0.91                 | 0.47                    |
|                | Height (m)               | 346  | 1.75   | 0.07  | 1.76   | 1.51  | 1.98   | -0.07                | 1.00                    | 354   | 1.61   | 0.06  | 1.61   | 1.35  | 1.78   | 0.06                 | 1.00                    |
|                | WC (cm)                  | 346  | 100.5  | 11.6  | 100.0  | 70.0  | 135.0  | 0.73                 | 0.10                    | 354   | 93.1   | 13.2  | 92.0   | 62.0  | 125.0  | 0.79                 | 0.18                    |
|                | Hip (cm)                 | 346  | 103.1  | 8.7   | 102.0  | 80.0  | 132.0  | 0.75                 | 0.17                    | 354   | 107.0  | 12.0  | 105.0  | 70.0  | 160.0  | 0.69                 | 0.27                    |
|                | WHR (cm/cm)              | 346  | 1.0    | 0.1   | 1.0    | 0.7   | 1.4    | 0.24                 | -0.06                   | 354   | 0.9    | 0.1   | 0.9    | 0.7   | 1.1    | 0.44                 | -0.04                   |
| EGCUT T2D      | Age (yrs)                | 355  | 63.5   | 10.2  | 64.0   | 36.0  | 94.0   | -0.29                | -0.25                   | 613   | 64.5   | 10.5  | 64.0   | 32.0  | 93.0   | -0.24                | -0.27                   |
|                | BMI (kg/m <sup>2</sup> ) | 354  | 32.6   | 4.7   | 31.9   | 20.5  | 51.4   | 1.00                 | -0.01                   | 613   | 33.7   | 5.7   | 32.8   | 21.2  | 56.9   | 1.00                 | -0.04                   |
|                | Weight (kg)              | 354  | 100.8  | 16.1  | 99.0   | 62.0  | 160.0  | 0.90                 | 0.41                    | 613   | 88.3   | 16.3  | 86.0   | 47.0  | 160.0  | 0.88                 | 0.43                    |

Supplementary Table 4. Study-specific descriptive statistics for studies included in stage 2 and ancillary analyses

| Study         | Trait                    | Men    |        |        |        |        |        |                      |                         | Women  |        |        |        |        |        |                      |                         |
|---------------|--------------------------|--------|--------|--------|--------|--------|--------|----------------------|-------------------------|--------|--------|--------|--------|--------|--------|----------------------|-------------------------|
|               |                          | N      | Mean   | SD     | Median | Min    | Max    | Correlation with BMI | Correlation with height | N      | Mean   | SD     | Median | Min    | Max    | Correlation with BMI | Correlation with height |
| ELY           | Height (m)               | 355    | 1.76   | 0.07   | 1.75   | 1.58   | 2.00   | -0.01                | 1.00                    | 613    | 1.62   | 0.06   | 1.62   | 1.43   | 1.84   | -0.04                | 1.00                    |
|               | WC (cm)                  | 272    | 111.7  | 11.2   | 110.5  | 82.0   | 145.0  | 0.78                 | 0.25                    | 417    | 104.6  | 14.2   | 103.0  | 62.0   | 150.0  | 0.79                 | 0.06                    |
|               | Hip (cm)                 | 272    | 110.0  | 11.2   | 110.0  | 70.0   | 155.0  | 0.76                 | 0.27                    | 417    | 116.0  | 14.0   | 115.0  | 63.0   | 165.0  | 0.64                 | 0.13                    |
|               | WHR (cm/cm)              | 272    | 1.0    | 0.1    | 1.0    | 0.7    | 1.6    | 0.19                 | 0.02                    | 417    | 0.9    | 0.1    | 0.9    | 0.7    | 1.1    | 0.16                 | -0.08                   |
|               | Age (yrs)                | 744    | 61.49  | 9.13   | 61.51  | 35.67  | 77.44  | -0.04                | -0.26                   | 856    | 60.82  | 9.25   | 60.17  | 36.34  | 78.88  | 0.08                 | -0.30                   |
|               | BMI (kg/m <sup>2</sup> ) | 744    | 27.36  | 3.99   | 26.81  | 15.98  | 45.82  | 1.00                 | -0.05                   | 855    | 27.29  | 5.37   | 26.33  | 16.89  | 59.28  | 1.00                 | -0.13                   |
|               | Weight (kg)              | 744    | 83.07  | 13.31  | 81.00  | 48.50  | 134.50 | 0.85                 | 0.43                    | 856    | 71.10  | 14.33  | 68.50  | 38.00  | 145.00 | 0.89                 | 0.29                    |
|               | Height (m)               | 744    | 1.74   | 0.07   | 1.74   | 1.55   | 2.00   | -0.05                | 1.00                    | 855    | 1.61   | 0.06   | 1.61   | 1.46   | 1.80   | -0.13                | 1.00                    |
| WC (cm)       | 736                      | 100.00 | 10.60  | 99.40  | 71.25  | 144.00 | 0.84   | 0.14                 | 853                     | 87.55  | 12.59  | 85.85  | 57.25  | 143.25 | 0.85   | 0.03                 |                         |
| Hip (cm)      | 736                      | 105.33 | 7.56   | 104.53 | 85.15  | 139.25 | 0.78   | 0.26                 | 852                     | 107.13 | 11.77  | 105.25 | 80.10  | 171.00 | 0.87   | 0.11                 |                         |
| WHR (cm/cm)   | 735                      | 0.95   | 0.06   | 0.95   | 0.75   | 1.14   | 0.54   | -0.06                | 852                     | 0.82   | 0.06   | 0.81   | 0.58   | 1.04   | 0.34   | -0.08                |                         |
| EPIC Controls | Age (yrs)                | 411    | 59.35  | 9.15   | 60.00  | 40.00  | 79.00  | 0.07                 | -0.22                   | 552    | 58.36  | 9.61   | 58.00  | 39.00  | 77.00  | 0.15                 | -0.26                   |
|               | BMI (kg/m <sup>2</sup> ) | 410    | 26.36  | 3.25   | 26.07  | 16.89  | 40.31  | 1.00                 | -0.08                   | 551    | 25.91  | 3.97   | 25.31  | 16.29  | 46.04  | 1.00                 | -0.08                   |
|               | Weight (kg)              | 411    | 79.77  | 11.35  | 78.40  | 51.00  | 135.00 | 0.81                 | 0.48                    | 551    | 67.20  | 11.16  | 65.40  | 41.20  | 126.60 | 0.86                 | 0.40                    |
|               | Height (m)               | 410    | 1.74   | 0.07   | 1.74   | 1.50   | 1.96   | -0.08                | 1.00                    | 552    | 1.61   | 0.06   | 1.61   | 1.42   | 1.79   | -0.08                | 1.00                    |
|               | WC (cm)                  | 411    | 94.92  | 9.74   | 94.40  | 71.80  | 134.00 | 0.82                 | 0.14                    | 550    | 81.46  | 10.34  | 79.95  | 56.50  | 122.10 | 0.82                 | 0.05                    |
|               | Hip (cm)                 | 410    | 102.51 | 6.30   | 102.30 | 83.20  | 125.30 | 0.77                 | 0.30                    | 549    | 102.67 | 8.60   | 101.50 | 81.60  | 153.80 | 0.84                 | 0.23                    |
|               | WHR (cm/cm)              | 410    | 0.92   | 0.06   | 0.92   | 0.76   | 1.16   | 0.58                 | -0.05                   | 549    | 0.79   | 0.06   | 0.79   | 0.65   | 1.00   | 0.45                 | -0.14                   |
| EPIC Cases    | Age (yrs)                | 432    | 61.54  | 8.12   | 62.00  | 41.00  | 77.00  | -0.01                | -0.21                   | 295    | 62.07  | 8.32   | 63.00  | 41.00  | 77.00  | -0.17                | -0.22                   |
|               | BMI (kg/m <sup>2</sup> ) | 432    | 29.10  | 3.79   | 28.56  | 19.58  | 49.06  | 1.00                 | 0.00                    | 291    | 30.12  | 5.11   | 29.79  | 19.49  | 45.51  | 1.00                 | 0.06                    |
|               | Weight (kg)              | 432    | 87.56  | 12.90  | 86.20  | 56.00  | 160.00 | 0.83                 | 0.51                    | 292    | 77.09  | 14.61  | 75.00  | 45.80  | 124.40 | 0.90                 | 0.45                    |
|               | Height (m)               | 432    | 1.73   | 0.06   | 1.73   | 1.54   | 1.93   | 0.00                 | 1.00                    | 294    | 1.60   | 0.06   | 1.60   | 1.44   | 1.78   | 0.06                 | 1.00                    |
|               | WC (cm)                  | 432    | 103.51 | 10.03  | 103.00 | 79.00  | 145.60 | 0.81                 | 0.19                    | 295    | 92.82  | 12.46  | 92.00  | 64.40  | 141.30 | 0.85                 | 0.18                    |
|               | Hip (cm)                 | 432    | 106.57 | 7.42   | 105.75 | 88.80  | 141.90 | 0.77                 | 0.27                    | 295    | 110.04 | 11.45  | 108.60 | 85.00  | 151.60 | 0.90                 | 0.25                    |

Supplementary Table 4. Study-specific descriptive statistics for studies included in stage 2 and ancillary analyses

| Study       | Trait                    | Men  |        |       |        |       |        |                      |                         | Women |        |       |        |       |        |                      |                         |
|-------------|--------------------------|------|--------|-------|--------|-------|--------|----------------------|-------------------------|-------|--------|-------|--------|-------|--------|----------------------|-------------------------|
|             |                          | N    | Mean   | SD    | Median | Min   | Max    | Correlation with BMI | Correlation with height | N     | Mean   | SD    | Median | Min   | Max    | Correlation with BMI | Correlation with height |
| Fenland     | WHR (cm/cm)              | 432  | 0.97   | 0.06  | 0.97   | 0.81  | 1.15   | 0.43                 | 0.02                    | 295   | 0.84   | 0.06  | 0.84   | 0.69  | 1.20   | 0.27                 | 0.01                    |
|             | Age (yrs)                | 1488 | 46.87  | 7.19  | 46.74  | 30.90 | 59.93  | 0.12                 | -0.10                   | 1698  | 46.90  | 7.04  | 47.13  | 30.48 | 59.95  | 0.16                 | -0.10                   |
|             | BMI (kg/m <sup>2</sup> ) | 1486 | 27.04  | 4.09  | 26.52  | 16.38 | 50.60  | 1.00                 | -0.09                   | 1698  | 26.48  | 5.48  | 25.37  | 16.86 | 59.85  | 1.00                 | -0.09                   |
|             | Weight (kg)              | 1486 | 85.41  | 14.13 | 83.40  | 52.00 | 177.60 | 0.86                 | 0.39                    | 1698  | 71.18  | 15.47 | 67.90  | 41.50 | 181.00 | 0.90                 | 0.32                    |
|             | Height (m)               | 1486 | 1.78   | 0.07  | 1.78   | 1.57  | 1.98   | -0.09                | 1.00                    | 1698  | 1.64   | 0.06  | 1.64   | 1.43  | 1.89   | -0.09                | 1.00                    |
|             | WC (cm)                  | 1485 | 96.44  | 11.23 | 95.25  | 65.60 | 148.95 | 0.89                 | 0.07                    | 1698  | 85.19  | 12.78 | 82.75  | 59.00 | 144.30 | 0.89                 | 0.07                    |
|             | Hip (cm)                 | 1485 | 103.15 | 7.18  | 102.45 | 83.35 | 155.00 | 0.81                 | 0.28                    | 1698  | 103.59 | 10.98 | 101.73 | 78.65 | 180.40 | 0.88                 | 0.19                    |
| WHR (cm/cm) | 1484                     | 0.93 | 0.07   | 0.93  | 0.76   | 1.17  | 0.68   | -0.14                | 1698                    | 0.82  | 0.07   | 0.81  | 0.50   | 1.17  | 0.53   | -0.08                |                         |
| GLACIER     | Age (yrs)                | 2381 | 50.06  | 8.34  | 50.00  | 30.00 | 62.00  | 0.14                 | -0.18                   | 3666  | 49.26  | 8.82  | 50.00  | 29.00 | 64.00  | 0.20                 | -0.18                   |
|             | BMI (kg/m <sup>2</sup> ) | 2381 | 26.08  | 3.43  | 25.75  | 17.79 | 59.03  | 1.00                 | -0.15                   | 3666  | 25.54  | 4.39  | 24.80  | 16.02 | 57.85  | 1.00                 | -0.20                   |
|             | Weight (kg)              | 2381 | 81.65  | 11.37 | 80.90  | 51.00 | 135.00 | 0.84                 | 0.40                    | 3666  | 68.55  | 11.69 | 67.00  | 40.00 | 146.00 | 0.88                 | 0.27                    |
|             | Height (m)               | 2381 | 1.77   | 0.06  | 1.77   | 1.50  | 2.07   | -0.15                | 1.00                    | 3666  | 1.64   | 0.06  | 1.64   | 1.23  | 1.91   | -0.20                | 1.00                    |
|             | WC (cm)                  | 874  | 96.97  | 10.06 | 96.00  | 71.00 | 156.00 | 0.81                 | 0.11                    | 1445  | 86.70  | 11.68 | 85.00  | 59.00 | 131.00 | 0.85                 | 0.06                    |
|             | Hip (cm)                 | -    | -      | -     | -      | -     | -      | -                    | -                       | -     | -      | -     | -      | -     | -      | -                    | -                       |
|             | WHR (cm/cm)              | -    | -      | -     | -      | -     | -      | -                    | -                       | -     | -      | -     | -      | -     | -      | -                    | -                       |
| HNR         | Age (yrs)                | 2261 | 59.65  | 7.81  | 60.00  | 45.00 | 76.00  | 0.07                 | -0.27                   | 2256  | 59.62  | 7.81  | 60.00  | 45.00 | 76.00  | 0.07                 | -0.23                   |
|             | BMI (kg/m <sup>2</sup> ) | 2250 | 27.98  | 4.86  | 27.60  | 18.10 | 49.40  | 1.00                 | -0.09                   | 2242  | 27.42  | 5.92  | 26.90  | 16.50 | 59.20  | 1.00                 | -0.16                   |
|             | Weight (kg)              | 2252 | 85.75  | 14.82 | 84.50  | 53.50 | 150.00 | 0.86                 | 0.42                    | 2242  | 72.05  | 15.18 | 70.80  | 43.30 | 150.00 | 0.92                 | 0.23                    |
|             | Height (m)               | 2256 | 1.71   | 0.62  | 1.75   | 1.51  | 2.00   | -0.09                | 1.00                    | 2244  | 1.56   | 0.78  | 1.62   | 1.43  | 1.83   | -0.16                | 1.00                    |
|             | WC (cm)                  | 2256 | 99.96  | 12.52 | 99.30  | 48.60 | 172.00 | 0.87                 | 0.09                    | 2246  | 88.03  | 14.41 | 87.20  | 46.00 | 144.70 | 0.88                 | 0.00                    |
|             | Hip (cm)                 | 2256 | 101.97 | 10.50 | 101.30 | 77.70 | 160.40 | 0.83                 | 0.20                    | 2245  | 103.58 | 13.93 | 103.00 | 57.00 | 160.60 | 0.88                 | 0.06                    |
|             | WHR (cm/cm)              | 2255 | 0.94   | 0.61  | 0.98   | 0.54  | 1.24   | 0.43                 | -0.11                   | 2245  | 0.80   | 0.70  | 0.85   | 0.53  | 1.28   | 0.37                 | -0.09                   |

Supplementary Table 4. Study-specific descriptive statistics for studies included in stage 2 and ancillary analyses

| Study                | Trait                    | Men  |        |       |        |       |        |                      |                         | Women |        |       |        |       |        |                      |                         |
|----------------------|--------------------------|------|--------|-------|--------|-------|--------|----------------------|-------------------------|-------|--------|-------|--------|-------|--------|----------------------|-------------------------|
|                      |                          | N    | Mean   | SD    | Median | Min   | Max    | Correlation with BMI | Correlation with height | N     | Mean   | SD    | Median | Min   | Max    | Correlation with BMI | Correlation with height |
| HUNT.TROMSO controls | Age (yrs)                | 664  | 61.40  | 13.40 | 63.00  | 20.00 | 93.00  | 0.02                 | -0.30                   | 626   | 65.50  | 13.40 | 68.00  | 20.00 | 92.00  | 0.16                 | -0.45                   |
|                      | BMI (kg/m <sup>2</sup> ) | 660  | 26.20  | 3.30  | 26.00  | 17.80 | 39.90  | 1.00                 | -0.02                   | 620   | 26.80  | 4.40  | 26.20  | 16.60 | 44.00  | 1.00                 | -0.13                   |
|                      | Weight (kg)              | 660  | 80.00  | 11.80 | 79.30  | 51.10 | 132.20 | 0.83                 | 0.49                    | 621   | 69.40  | 11.90 | 68.50  | 39.90 | 112.00 | 0.89                 | 0.31                    |
|                      | Height (m)               | 661  | 1.70   | 0.10  | 1.80   | 1.50  | 2.00   | -0.02                | 1.00                    | 621   | 1.60   | 0.10  | 1.60   | 1.40  | 1.80   | -0.13                | 1.00                    |
|                      | WC (cm)                  | 510  | 93.80  | 9.00  | 94.00  | 70.00 | 121.00 | 0.78                 | 0.18                    | 484   | 86.10  | 10.70 | 85.00  | 62.00 | 117.00 | 0.83                 | 0.03                    |
|                      | Hip (cm)                 | 510  | 102.30 | 5.90  | 102.00 | 85.00 | 123.00 | 0.72                 | 0.26                    | 483   | 104.30 | 9.30  | 104.00 | 82.00 | 134.00 | 0.87                 | 0.15                    |
|                      | WHR (cm/cm)              | 510  | 0.92   | 0.06  | 0.91   | 0.75  | 1.13   | 0.52                 | 0.02                    | 483   | 0.82   | 0.06  | 0.82   | 0.67  | 1.07   | 0.41                 | -0.14                   |
| HUNT.TROMSO cases    | Age (yrs)                | 547  | 62.00  | 12.20 | 63.00  | 27.00 | 90.00  | -0.26                | -0.20                   | 531   | 66.00  | 13.10 | 68.00  | 28.00 | 91.00  | -0.15                | -0.30                   |
|                      | BMI (kg/m <sup>2</sup> ) | 546  | 28.40  | 4.00  | 28.20  | 18.30 | 46.10  | 1.00                 | 0.03                    | 524   | 30.00  | 5.40  | 29.70  | 17.30 | 48.00  | 1.00                 | -0.04                   |
|                      | Weight (kg)              | 546  | 87.00  | 14.10 | 86.00  | 52.90 | 144.40 | 0.86                 | 0.49                    | 524   | 77.10  | 14.80 | 76.10  | 38.40 | 129.10 | 0.91                 | 0.34                    |
|                      | Height (m)               | 546  | 1.70   | 0.10  | 1.80   | 1.50  | 2.00   | 0.03                 | 1.00                    | 525   | 1.60   | 0.10  | 1.60   | 1.40  | 1.80   | -0.04                | 1.00                    |
|                      | WC (cm)                  | 422  | 100.10 | 10.00 | 100.00 | 73.00 | 139.50 | 0.81                 | 0.16                    | 392   | 95.50  | 12.60 | 95.00  | 50.00 | 133.00 | 0.86                 | 0.02                    |
|                      | Hip (cm)                 | 422  | 104.90 | 6.80  | 105.00 | 87.00 | 131.00 | 0.73                 | 0.31                    | 392   | 110.30 | 11.30 | 108.80 | 83.00 | 150.00 | 0.87                 | 0.06                    |
|                      | WHR (cm/cm)              | 422  | 0.95   | 0.06  | 0.95   | 0.74  | 1.47   | 0.50                 | -0.02                   | 392   | 0.87   | 0.07  | 0.86   | 0.44  | 1.06   | 0.34                 | -0.04                   |
| IMPROVE              | Age (yrs)                | 1666 | 64.03  | 5.35  | 64.45  | 54.49 | 79.47  | -0.09                | -0.03                   | 1783  | 64.38  | 5.45  | 64.62  | 54.47 | 79.78  | -0.02                | -0.02                   |
|                      | BMI (kg/m <sup>2</sup> ) | 1665 | 27.40  | 3.64  | 27.08  | 18.93 | 47.16  | 1.00                 | 0.06                    | 1783  | 27.11  | 4.77  | 26.48  | 15.93 | 47.46  | 1.00                 | 0.05                    |
|                      | Weight (kg)              | 1665 | 83.48  | 13.17 | 82.00  | 51.40 | 160.00 | 0.84                 | 0.55                    | 1783  | 70.30  | 14.07 | 68.40  | 39.00 | 131.00 | 0.90                 | 0.45                    |
|                      | Height (m)               | 1665 | 1.74   | 0.07  | 1.74   | 1.52  | 1.97   | 0.06                 | 1.00                    | 1783  | 1.61   | 0.06  | 1.60   | 1.42  | 1.83   | 0.05                 | 1.00                    |
|                      | WC (cm)                  | 1664 | 98.70  | 10.82 | 98.00  | 64.00 | 150.00 | 0.82                 | 0.30                    | 1775  | 89.62  | 12.47 | 89.00  | 54.00 | 145.00 | 0.82                 | 0.23                    |
|                      | Hip (cm)                 | 1664 | 101.70 | 8.13  | 101.00 | 73.00 | 155.00 | 0.51                 | 0.00                    | 1775  | 102.84 | 10.79 | 102.00 | 67.00 | 160.00 | 0.34                 | 0.01                    |
|                      | WHR (cm/cm)              | 1664 | 0.97   | 0.07  | 0.96   | 0.67  | 1.45   | 0.68                 | 0.43                    | 1775  | 0.87   | 0.07  | 0.87   | 0.58  | 1.31   | 0.84                 | 0.32                    |
| KORA S3 METABO       | Age (yrs)                | 604  | 40.90  | 13.27 | 37.00  | 25.00 | 74.00  | 0.22                 | -0.38                   | 674   | 40.91  | 12.68 | 38.00  | 25.00 | 74.00  | 0.31                 | -0.39                   |
|                      | BMI (kg/m <sup>2</sup> ) | 599  | 26.54  | 3.43  | 26.16  | 18.03 | 40.99  | 1.00                 | -0.14                   | 659   | 25.18  | 4.72  | 24.09  | 16.89 | 40.99  | 1.00                 | -0.25                   |

Supplementary Table 4. Study-specific descriptive statistics for studies included in stage 2 and ancillary analyses

| Study                    | Trait                    | Men    |        |        |        |        |        |                      |                         | Women  |        |        |        |        |        |                      |                         |
|--------------------------|--------------------------|--------|--------|--------|--------|--------|--------|----------------------|-------------------------|--------|--------|--------|--------|--------|--------|----------------------|-------------------------|
|                          |                          | N      | Mean   | SD     | Median | Min    | Max    | Correlation with BMI | Correlation with height | N      | Mean   | SD     | Median | Min    | Max    | Correlation with BMI | Correlation with height |
| KORA S4 METABO           | Weight (kg)              | 599    | 82.39  | 11.58  | 81.00  | 52.30  | 132.00 | 0.84                 | 0.42                    | 659    | 66.73  | 12.19  | 64.20  | 43.60  | 132.00 | 0.91                 | 0.18                    |
|                          | Height (m)               | 603    | 1.76   | 0.07   | 1.77   | 1.59   | 2.00   | -0.14                | 1.00                    | 671    | 1.63   | 0.06   | 1.63   | 1.42   | 2.00   | -0.25                | 1.00                    |
|                          | WC (cm)                  | 603    | 92.84  | 9.32   | 92.00  | 70.50  | 127.00 | 0.85                 | -0.01                   | 660    | 79.20  | 11.41  | 76.50  | 59.00  | 127.00 | 0.89                 | -0.14                   |
|                          | Hip (cm)                 | 603    | 102.94 | 6.23   | 102.50 | 86.00  | 125.00 | 0.78                 | 0.25                    | 660    | 101.33 | 9.57   | 100.00 | 79.00  | 125.00 | 0.90                 | 0.02                    |
|                          | WHR (cm/cm)              | 603    | 0.90   | 0.06   | 0.90   | 0.76   | 1.10   | 0.58                 | -0.24                   | 660    | 0.78   | 0.06   | 0.77   | 0.63   | 1.10   | 0.51                 | -0.29                   |
|                          | Age (yrs)                | 585    | 42.70  | 15.85  | 36.00  | 24.00  | 75.00  | 0.34                 | -0.48                   | 637    | 41.19  | 14.83  | 36.00  | 24.00  | 75.00  | 0.31                 | -0.47                   |
|                          | BMI (kg/m <sup>2</sup> ) | 582    | 26.64  | 3.59   | 26.38  | 16.32  | 41.79  | 1.00                 | -0.23                   | 624    | 25.94  | 5.09   | 25.34  | 15.84  | 41.79  | 1.00                 | -0.24                   |
|                          | Weight (kg)              | 582    | 82.66  | 11.65  | 81.45  | 52.30  | 136.50 | 0.82                 | 0.36                    | 624    | 68.88  | 13.38  | 67.15  | 41.10  | 136.50 | 0.90                 | 0.19                    |
|                          | Height (m)               | 585    | 1.76   | 0.07   | 1.76   | 1.56   | 1.96   | -0.23                | 1.00                    | 632    | 1.63   | 0.07   | 1.63   | 1.39   | 1.96   | -0.24                | 1.00                    |
|                          | WC (cm)                  | 585    | 94.38  | 9.99   | 93.50  | 65.40  | 134.20 | 0.89                 | -0.12                   | 624    | 82.16  | 12.00  | 80.60  | 61.00  | 134.20 | 0.90                 | -0.13                   |
| Hip (cm)                 | 585                      | 104.15 | 6.43   | 103.75 | 87.20  | 136.00 | 0.81   | 0.21                 | 624                     | 103.94 | 9.99   | 102.77 | 81.87  | 136.00 | 0.92   | 0.03                 |                         |
| WHR (cm/cm)              | 585                      | 0.91   | 0.06   | 0.90   | 0.72   | 1.07   | 0.63   | -0.36                | 624                     | 0.79   | 0.06   | 0.78   | 0.62   | 1.07   | 0.53   | -0.27                |                         |
| LURIC                    | Age (yrs)                | 2007   | 61.70  | 10.70  | 62.60  | 18.60  | 88.50  | -0.03                | -0.27                   | 888    | 64.80  | 10.30  | 65.30  | 27.00  | 92.10  | -0.01                | -0.18                   |
|                          | BMI (kg/m <sup>2</sup> ) | 2007   | 27.50  | 3.80   | 27.00  | 16.30  | 57.10  | 1.00                 | -0.08                   | 888    | 27.20  | 4.70   | 26.80  | 16.40  | 46.10  | 1.00                 | -0.07                   |
|                          | Weight (kg)              | 2007   | 83.10  | 12.70  | 82.00  | 51.00  | 185.00 | 0.86                 | 0.44                    | 888    | 71.00  | 13.10  | 70.00  | 41.00  | 125.00 | 0.91                 | 0.35                    |
|                          | Height (m)               | 2007   | 1.74   | 0.07   | 1.73   | 1.52   | 2.02   | -0.08                | 1.00                    | 888    | 1.61   | 0.06   | 1.61   | 1.41   | 1.89   | -0.07                | 1.00                    |
|                          | WC (cm)                  | 1978   | 100.70 | 10.70  | 100.00 | 61.00  | 165.00 | 0.77                 | 0.91                    | 876    | 94.10  | 13.00  | 94.00  | 58.00  | 135.00 | 0.79                 | 0.10                    |
|                          | Hip (cm)                 | 1978   | 102.50 | 8.80   | 102.00 | 66.00  | 165.00 | 0.68                 | 0.17                    | 876    | 103.80 | 11.60  | 103.00 | 70.00  | 150.00 | 0.79                 | 0.16                    |
|                          | WHR (cm/cm)              | 1978   | 0.98   | 0.06   | 0.98   | 0.63   | 1.61   | 0.34                 | -0.07                   | 876    | 0.91   | 0.08   | 0.90   | 0.65   | 1.22   | 0.25                 | -0.04                   |
|                          | Age (yrs)                | 2138   | 59.40  | 8.00   | 59.80  | 25.10  | 76.40  | 0.05                 | -0.14                   | 335    | 57.30  | 9.00   | 58.80  | 27.30  | 73.70  | 0.22                 | -0.25                   |
| BMI (kg/m <sup>2</sup> ) | 2095                     | 26.90  | 4.00   | 26.50  | 16.70  | 51.90  | 1.00   | -0.02                | 319                     | 27.60  | 5.00   | 26.80  | 15.40  | 51.10  | 1.00   | -0.08                |                         |
| Weight (kg)              | 2095                     | 80.60  | 13.30  | 79.60  | 42.80  | 154.00 | 0.89   | 0.43                 | 320                     | 69.90  | 13.50  | 68.20  | 40.80  | 134.00 | 0.90   | 0.36                 |                         |
| Height (m)               | 2094                     | 1.73   | 0.07   | 1.73   | 1.51   | 1.94   | -0.02  | 1.00                 | 319                     | 1.59   | 0.07   | 1.59   | 1.39   | 1.78   | -0.08  | 1.00                 |                         |

Supplementary Table 4. Study-specific descriptive statistics for studies included in stage 2 and ancillary analyses

| Study        | Trait                    | Men  |        |       |        |       |        |                      |                         | Women |        |       |        |       |        |                      |                         |
|--------------|--------------------------|------|--------|-------|--------|-------|--------|----------------------|-------------------------|-------|--------|-------|--------|-------|--------|----------------------|-------------------------|
|              |                          | N    | Mean   | SD    | Median | Min   | Max    | Correlation with BMI | Correlation with height | N     | Mean   | SD    | Median | Min   | Max    | Correlation with BMI | Correlation with height |
| MoRGAM Cases | WC (cm)                  | 1084 | 95.10  | 10.90 | 94.50  | 64.00 | 144.00 | 0.88                 | 0.12                    | 287   | 85.30  | 12.30 | 83.50  | 60.50 | 121.00 | 0.87                 | 0.04                    |
|              | Hip (cm)                 | 1084 | 100.60 | 7.70  | 100.00 | 74.50 | 144.00 | 0.78                 | 0.24                    | 287   | 103.60 | 9.40  | 102.00 | 82.50 | 144.00 | 0.87                 | 0.16                    |
|              | WHR (cm/cm)              | 1084 | 0.90   | 0.10  | 1.00   | 0.70  | 1.20   | 0.59                 | -0.07                   | 287   | 0.80   | 0.10  | 0.80   | 0.70  | 1.10   | 0.56                 | -0.11                   |
|              | Age (yrs)                | 1772 | 58.80  | 7.80  | 58.60  | 25.50 | 75.80  | -0.01                | -0.06                   | 280   | 57.90  | 8.50  | 59.50  | 30.60 | 73.90  | 0.14                 | -0.29                   |
|              | BMI (kg/m <sup>2</sup> ) | 1707 | 27.50  | 3.90  | 27.20  | 17.00 | 48.00  | 1.00                 | -0.04                   | 246   | 29.10  | 5.70  | 28.50  | 17.90 | 50.70  | 1.00                 | -0.26                   |
|              | Weight (kg)              | 1708 | 81.70  | 12.80 | 80.60  | 50.20 | 129.00 | 0.88                 | 0.43                    | 246   | 72.80  | 14.10 | 71.40  | 46.90 | 132.00 | 0.92                 | 0.14                    |
|              | Height (m)               | 1707 | 1.72   | 0.06  | 1.72   | 1.50  | 1.97   | -0.04                | 1.00                    | 246   | 1.58   | 0.06  | 1.58   | 1.38  | 1.80   | -0.26                | 1.00                    |
|              | WHR (cm/cm)              | 983  | 97.50  | 10.70 | 96.50  | 72.00 | 138.50 | 0.86                 | 0.12                    | 222   | 88.90  | 13.40 | 87.50  | 61.50 | 131.00 | 0.87                 | -0.10                   |
| NSHD         | Hip (cm)                 | 984  | 101.00 | 7.80  | 100.00 | 75.00 | 137.00 | 0.76                 | 0.20                    | 222   | 105.80 | 10.30 | 104.80 | 82.50 | 147.50 | 0.90                 | -0.06                   |
|              | WHR (cm/cm)              | 983  | 1.00   | 0.10  | 1.00   | 0.70  | 1.20   | 0.53                 | -0.03                   | 222   | 0.80   | 0.10  | 0.80   | 0.60  | 1.40   | 0.43                 | -0.10                   |
|              | Age (yrs)                | 466  | 53.00  |       | 53.00  | 53.00 | 53.00  |                      |                         | 522   | 53.00  |       | 53.00  | 53.00 | 53.00  |                      |                         |
|              | BMI (kg/m <sup>2</sup> ) | 464  | 27.61  | 4.16  | 26.97  | 18.19 | 43.05  | 1.00                 | -0.09                   | 515   | 27.72  | 5.54  | 26.63  | 18.62 | 57.12  | 1.00                 | -0.10                   |
|              | Weight (kg)              | 464  | 83.51  | 13.37 | 81.30  | 54.40 | 136.50 | 0.87                 | 0.36                    | 516   | 72.04  | 14.62 | 69.80  | 42.20 | 154.00 | 0.91                 | 0.28                    |
|              | Height (m)               | 464  | 1.74   | 0.06  | 1.74   | 1.53  | 1.95   | -0.09                | 1.00                    | 520   | 1.61   | 0.06  | 1.61   | 1.39  | 1.79   | -0.10                | 1.00                    |
|              | WC (cm)                  | 463  | 98.00  | 10.76 | 97.00  | 74.00 | 135.00 | 0.84                 | 0.14                    | 519   | 86.77  | 13.30 | 85.00  | 63.00 | 159.00 | 0.85                 | 0.05                    |
|              | Hip (cm)                 | 463  | 103.85 | 7.10  | 103.00 | 89.00 | 143.00 | 0.77                 | 0.28                    | 519   | 106.23 | 10.89 | 105.00 | 75.00 | 148.00 | 0.88                 | 0.11                    |
| WHR (cm/cm)  | 463                      | 0.94 | 0.06   | 0.94  | 0.75   | 1.14  | 0.62   | -0.03                | 518                     | 0.81  | 0.07   | 0.81  | 0.65   | 1.10  | 0.45   | -0.03                |                         |
| PIVUS        | Age (yrs)                | 490  | 70.13  | 0.17  | 70.13  | 69.84 | 72.28  | 0.07                 | -0.06                   | 488   | 70.26  | 0.15  | 70.28  | 69.94 | 70.76  | -0.07                | -0.02                   |
|              | BMI (kg/m <sup>2</sup> ) | 490  | 27.05  | 3.72  | 26.90  | 17.70 | 43.40  | 1.00                 | -0.05                   | 488   | 27.12  | 4.92  | 26.50  | 16.60 | 49.80  | 1.00                 | -0.13                   |
|              | Weight (kg)              | 490  | 83.70  | 13.00 | 82.00  | 53.00 | 138.00 | 0.87                 | 0.45                    | 488   | 71.33  | 13.20 | 71.00  | 42.00 | 126.00 | 0.93                 | 0.25                    |
|              | Height (m)               | 490  | 1.76   | 0.07  | 1.75   | 1.55  | 1.98   | -0.05                | 1.00                    | 488   | 1.62   | 0.06  | 1.62   | 1.48  | 1.84   | -0.13                | 1.00                    |
|              | WC (cm)                  | 485  | 94.86  | 10.45 | 95.00  | 64.00 | 134.00 | 0.89                 | 0.14                    | 483   | 87.67  | 11.61 | 87.00  | 60.00 | 134.00 | 0.89                 | 0.03                    |
|              | Hip (cm)                 | 485  | 100.26 | 6.75  | 100.00 | 86.00 | 130.00 | 0.80                 | 0.33                    | 483   | 101.41 | 9.26  | 101.00 | 71.00 | 143.00 | 0.89                 | 0.13                    |



Supplementary Table 4. Study-specific descriptive statistics for studies included in stage 2 and ancillary analyses

| Study              | Trait                    | Men  |        |       |        |       |        |                      |                         | Women |        |       |        |       |        |                      |                         |
|--------------------|--------------------------|------|--------|-------|--------|-------|--------|----------------------|-------------------------|-------|--------|-------|--------|-------|--------|----------------------|-------------------------|
|                    |                          | N    | Mean   | SD    | Median | Min   | Max    | Correlation with BMI | Correlation with height | N     | Mean   | SD    | Median | Min   | Max    | Correlation with BMI | Correlation with height |
|                    | WHR (cm/cm)              | 485  | 0.94   | 0.06  | 0.94   | 0.64  | 1.19   | 0.65                 | -0.10                   | 483   | 0.86   | 0.06  | 0.86   | 0.60  | 1.07   | 0.51                 | -0.10                   |
| STR                | Age (yrs)                | 1046 | 74.33  | 9.01  | 75.24  | 45.76 | 93.03  | -0.12                | -0.23                   | 1384  | 76.10  | 9.73  | 78.25  | 39.76 | 103.78 | -0.11                | -0.21                   |
|                    | BMI (kg/m <sup>2</sup> ) | 838  | 25.13  | 3.36  | 24.82  | 14.53 | 38.57  | 1.00                 | -0.09                   | 1378  | 25.03  | 4.24  | 24.55  | 14.06 | 46.07  | 1.00                 | -0.04                   |
|                    | Weight (kg)              | 1043 | 76.67  | 11.69 | 76.00  | 45.00 | 132.00 | 0.84                 | 0.46                    | 1377  | 63.84  | 11.68 | 63.00  | 35.00 | 126.00 | 0.90                 | 0.38                    |
|                    | Height (m)               | 808  | 1.74   | 0.07  | 1.73   | 1.52  | 1.95   | -0.09                | 1.00                    | 1377  | 1.59   | 0.06  | 1.60   | 1.36  | 1.78   | -0.04                | 1.00                    |
|                    | WC (cm)                  | 563  | 96.63  | 9.36  | 96.00  | 71.00 | 130.00 | 0.80                 | 0.11                    | 780   | 85.54  | 10.02 | 84.00  | 61.00 | 131.00 | 0.78                 | 0.05                    |
|                    | Hip (cm)                 | 563  | 100.78 | 7.98  | 101.00 | 80.00 | 131.00 | 0.65                 | 0.07                    | 778   | 99.33  | 9.95  | 99.00  | 49.00 | 133.00 | 0.75                 | 0.09                    |
|                    | WHR (cm/cm)              | 563  | 0.96   | 0.05  | 0.96   | 0.79  | 1.19   | 0.40                 | 0.09                    | 778   | 0.86   | 0.07  | 0.86   | 0.63  | 1.61   | 0.20                 | -0.04                   |
| THISEAS - controls | Age (yrs)                | 432  | 54.30  | 13.31 | 52.00  | 24.00 | 89.00  | 0.09                 | -0.41                   | 549   | 60.63  | 14.07 | 63.00  | 25.00 | 91.86  | 0.36                 | -0.57                   |
|                    | BMI (kg/m <sup>2</sup> ) | 416  | 28.86  | 4.26  | 28.43  | 19.15 | 44.58  | 1.00                 | -0.18                   | 530   | 28.60  | 5.26  | 28.14  | 17.67 | 49.56  | 1.00                 | -0.29                   |
|                    | Weight (kg)              | 432  | 87.43  | 14.32 | 86.00  | 52.00 | 140.00 | 0.80                 | 0.44                    | 548   | 71.82  | 13.44 | 71.00  | 5.50  | 161.00 | 0.86                 | 0.22                    |
|                    | Height (m)               | 430  | 1.74   | 0.08  | 1.75   | 1.08  | 1.94   | -0.18                | 1.00                    | 548   | 1.59   | 0.08  | 1.59   | 1.36  | 1.83   | -0.29                | 1.00                    |
|                    | WC (cm)                  | 357  | 101.97 | 12.39 | 100.50 | 53.00 | 193.00 | 0.73                 | 0.03                    | 363   | 90.33  | 13.92 | 89.00  | 38.00 | 131.00 | 0.77                 | -0.15                   |
|                    | Hip (cm)                 | 357  | 105.47 | 8.28  | 105.00 | 79.00 | 138.00 | 0.71                 | 0.08                    | 363   | 105.17 | 13.56 | 105.00 | 11.00 | 148.00 | 0.67                 | -0.06                   |
|                    | WHR (cm/cm)              | 357  | 0.97   | 0.09  | 0.96   | 0.51  | 1.87   | 0.35                 | -0.02                   | 363   | 0.89   | 0.48  | 0.85   | 0.36  | 8.27   | 0.06                 | -0.03                   |
| THISEAS cases      | Age (yrs)                | 435  | 62.15  | 10.69 | 62.00  | 33.00 | 88.00  | -0.20                | -0.20                   | 79    | 66.19  | 11.06 | 67.00  | 37.00 | 89.00  | -0.23                | -0.16                   |
|                    | BMI (kg/m <sup>2</sup> ) | 423  | 27.91  | 4.00  | 27.45  | 18.37 | 44.00  | 1.00                 | -0.06                   | 78    | 28.42  | 4.51  | 27.68  | 19.92 | 40.70  | 1.00                 | -0.06                   |
|                    | Weight (kg)              | 401  | 82.86  | 13.16 | 80.00  | 48.00 | 140.00 | 0.86                 | 0.45                    | 75    | 72.95  | 13.06 | 72.40  | 49.70 | 106.80 | 0.84                 | 0.48                    |
|                    | Height (m)               | 404  | 1.72   | 0.07  | 1.72   | 1.55  | 1.98   | -0.06                | 1.00                    | 75    | 1.60   | 0.08  | 1.60   | 1.34  | 1.75   | -0.06                | 1.00                    |
|                    | WC (cm)                  | 341  | 100.25 | 12.21 | 100.00 | 17.00 | 140.00 | 0.68                 | 0.06                    | 62    | 95.92  | 17.09 | 95.50  | 10.00 | 134.00 | 0.31                 | 0.18                    |
|                    | Hip (cm)                 | 199  | 101.28 | 9.70  | 101.00 | 44.00 | 123.00 | 0.57                 | 0.22                    | 54    | 107.52 | 12.03 | 106.00 | 85.00 | 144.00 | 0.84                 | 0.25                    |
|                    | WHR (cm/cm)              | 199  | 0.99   | 0.13  | 0.99   | 0.15  | 2.36   | 0.14                 | -0.14                   | 54    | 0.89   | 0.14  | 0.90   | 0.08  | 1.15   | -0.20                | 0.07                    |
| ULSAM              | Age (yrs)                | 111  | 71.00  | 0.63  | 71.00  | 69.4  | 74.10  | -0.06                | 0.02                    | -     | -      | -     | -      | -     | -      | -                    | -                       |

Supplementary Table 4. Study-specific descriptive statistics for studies included in stage 2 and ancillary analyses

| Study             | Trait                    | Men   |        |       |        |        |        |                      |                         | Women  |       |        |        |        |        |                      |                         |   |
|-------------------|--------------------------|-------|--------|-------|--------|--------|--------|----------------------|-------------------------|--------|-------|--------|--------|--------|--------|----------------------|-------------------------|---|
|                   |                          | N     | Mean   | SD    | Median | Min    | Max    | Correlation with BMI | Correlation with height | N      | Mean  | SD     | Median | Min    | Max    | Correlation with BMI | Correlation with height |   |
| Whitehall         | BMI (kg/m <sup>2</sup> ) | 1112  | 26.26  | 3.40  | 25.93  | 16.69  | 46.34  | 1.00                 | -0.07                   | -      | -     | -      | -      | -      | -      | -                    | -                       |   |
|                   | Weight (kg)              | 1116  | 80.41  | 11.42 | 79.50  | 46.00  | 138.70 | 0.87                 | 0.42                    | -      | -     | -      | -      | -      | -      | -                    | -                       |   |
|                   | Height (m)               | 1112  | 1.75   | 0.06  | 1.75   | 1.56   | 2.00   | -0.07                | 1.00                    | -      | -     | -      | -      | -      | -      | -                    | -                       |   |
|                   | WC (cm)                  | 1095  | 94.77  | 9.55  | 94.00  | 51.00  | 137.00 | 0.87                 | 0.13                    | -      | -     | -      | -      | -      | -      | -                    | -                       |   |
|                   | Hip (cm)                 | 1095  | 100.17 | 7.08  | 100.00 | 51.00  | 141.00 | 0.78                 | 0.28                    | -      | -     | -      | -      | -      | -      | -                    | -                       |   |
|                   | WHR (cm/cm)              | 1095  | 0.95   | 0.05  | 0.95   | 0.78   | 1.14   | 0.58                 | -0.11                   | -      | -     | -      | -      | -      | -      | -                    | -                       | - |
|                   | Age (yrs)                | 2555  | 60.75  | 5.91  | 59.62  | 50.69  | 73.71  | -0.03                | -0.15                   | 822    | 61.06 | 6.01   | 60.55  | 50.47  | 73.31  | 0.10                 | -0.19                   |   |
|                   | BMI (kg/m <sup>2</sup> ) | 2548  | 26.60  | 3.66  | 26.30  | 17.90  | 48.70  | 1.00                 | -0.08                   | 820    | 27.29 | 5.53   | 26.20  | 15.80  | 49.00  | 1.00                 | -0.13                   |   |
|                   | Weight (kg)              | 2549  | 81.71  | 12.35 | 80.40  | 43.00  | 144.20 | 0.84                 | 0.42                    | 821    | 71.05 | 14.79  | 68.70  | 38.90  | 138.30 | 0.90                 | 0.28                    |   |
|                   | Height (m)               | 2550  | 1.75   | 0.07  | 1.75   | 1.44   | 1.98   | -0.08                | 1.00                    | 821    | 1.61  | 0.07   | 1.61   | 1.39   | 1.86   | -0.13                | 1.00                    |   |
| WC (cm)           | 2554                     | 95.14 | 10.35  | 94.45 | 66.55  | 138.00 | 0.89   | 0.11                 | 821                     | 86.37  | 13.51 | 85.15  | 55.15  | 132.50 | 0.90   | 0.01                 |                         |   |
| Hip (cm)          | 2554                     | 99.91 | 6.61   | 99.40 | 76.00  | 156.00 | 0.79   | 0.33                 | 820                     | 102.52 | 10.78 | 101.10 | 73.20  | 142.20 | 0.88   | 0.15                 |                         |   |
| WHR (cm/cm)       | 2554                     | 0.95  | 0.06   | 0.95  | 0.72   | 1.20   | 0.66   | -0.13                | 820                     | 0.84   | 0.07  | 0.84   | 0.66   | 1.11   | 0.58   | -0.14                |                         |   |
| WTCCC T2D nonGWAS | Age (yrs)                | 626   | 56.27  | 10.24 | 57.00  | 20.83  | 87.00  | -0.19                | -0.11                   | 448    | 56.37 | 11.07  | 57.87  | 19.44  | 80.09  | -0.15                | -0.11                   |   |
|                   | BMI (kg/m <sup>2</sup> ) | 624   | 31.19  | 5.60  | 30.40  | 16.80  | 60.30  | 1.00                 | 0.04                    | 445    | 33.83 | 7.61   | 33.00  | 18.70  | 59.60  | 1.00                 | -0.05                   |   |
|                   | Weight (kg)              | 624   | 96.63  | 19.19 | 95.00  | 57.00  | 190.51 | 0.92                 | 0.42                    | 445    | 88.19 | 20.89  | 84.70  | 43.00  | 165.50 | 0.94                 | 0.30                    |   |
|                   | Height (m)               | 625   | 1.76   | 0.07  | 1.76   | 1.56   | 2.20   | 0.04                 | 1.00                    | 445    | 1.61  | 0.07   | 1.61   | 1.39   | 1.79   | -0.05                | 1.00                    |   |
|                   | WC (cm)                  | 606   | 108.7  | 14.9  | 107.0  | 75.0   | 200.7  | 0.87                 | 0.19                    | 431    | 104.3 | 15.4   | 104.0  | 60.0   | 149.0  | 0.86                 | 0.09                    |   |
|                   | Hip (cm)                 | 606   | 110.2  | 12.0  | 109.0  | 86.4   | 215.9  | 0.76                 | 0.22                    | 431    | 116.2 | 15.5   | 114.0  | 79.5   | 172.0  | 0.89                 | 0.09                    |   |
|                   | WHR (cm/cm)              | 604   | 0.99   | 0.07  | 1.00   | 0.80   | 1.28   | 0.48                 | 0.05                    | 431    | 0.90  | 0.07   | 0.90   | 0.70   | 1.16   | 0.14                 | 0.01                    |   |

**Supplementary Table 4. Study-specific descriptive statistics for studies included in stage 2 and ancillary analyses**

| Study                                                   | Trait                    | Men |        |       |        |       |        |                      |                         | Women |        |       |        |       |        |                      |                         |
|---------------------------------------------------------|--------------------------|-----|--------|-------|--------|-------|--------|----------------------|-------------------------|-------|--------|-------|--------|-------|--------|----------------------|-------------------------|
|                                                         |                          | N   | Mean   | SD    | Median | Min   | Max    | Correlation with BMI | Correlation with height | N     | Mean   | SD    | Median | Min   | Max    | Correlation with BMI | Correlation with height |
| <b>Ancillary</b>                                        |                          |     |        |       |        |       |        |                      |                         |       |        |       |        |       |        |                      |                         |
| Essen Obesity Study (Essen Case-Control GWAS)           | Age (yrs)                | 171 | 25.38  | 4.57  | 24.71  | 16.88 | 46.32  | 0.20                 | 0.03                    | 264   | 26.54  | 6.37  | 24.51  | 17.26 | 58.78  | 0.44                 | -0.15                   |
| Controls                                                | BMI (kg/m <sup>2</sup> ) | 171 | 18.86  | 0.94  | 18.95  | 16.29 | 21.80  | 1.00                 | 0.07                    | 264   | 17.58  | 0.95  | 17.69  | 13.22 | 19.78  | 1.00                 | -0.09                   |
|                                                         | Weight (kg)              | 171 | 63.64  | 6.12  | 63.40  | 46.50 | 83.10  | 0.58                 | 0.85                    | 264   | 50.53  | 4.61  | 50.50  | 38.40 | 64.50  | 0.52                 | 0.80                    |
|                                                         | Height (m)               | 171 | 1.84   | 0.07  | 1.83   | 1.64  | 2.04   | 0.07                 | 1.00                    | 264   | 1.69   | 0.07  | 1.70   | 1.50  | 1.90   | -0.09                | 1.00                    |
|                                                         | WC (cm)                  | 167 | 73.21  | 4.16  | 73.00  | 62.00 | 85.00  | 0.48                 | 0.50                    | 257   | 64.71  | 4.31  | 64.00  | 55.50 | 85.00  | 0.37                 | 0.27                    |
|                                                         | Hip (cm)                 | 167 | 91.34  | 4.79  | 91.00  | 67.00 | 102.00 | 0.41                 | 0.55                    | 256   | 87.13  | 5.22  | 87.00  | 62.00 | 101.00 | 0.31                 | 0.42                    |
|                                                         | WHR (cm/cm)              | 167 | 0.80   | 0.04  | 0.80   | 0.68  | 1.04   | 0.09                 | 0.00                    | 256   | 0.74   | 0.05  | 0.74   | 0.62  | 0.97   | 0.10                 | -0.11                   |
| Essen Obesity Study (Essen Case-Control GWAS)           | Age (yrs)                | 192 | 14.18  | 3.85  | 13.96  | 3.37  | 39.18  | 0.40                 | 0.70                    | 261   | 14.50  | 3.67  | 14.31  | 5.62  | 24.42  | 0.59                 | 0.61                    |
| Cases                                                   | BMI (kg/m <sup>2</sup> ) | 192 | 33.11  | 6.48  | 32.34  | 21.88 | 56.86  | 1.00                 | 0.47                    | 261   | 33.18  | 6.84  | 32.33  | 20.35 | 61.88  | 1.00                 | 0.40                    |
|                                                         | Weight (kg)              | 190 | 92.81  | 29.19 | 89.45  | 24.90 | 186.20 | 0.89                 | 0.80                    | 260   | 87.59  | 24.58 | 87.80  | 25.80 | 176.00 | 0.90                 | 0.74                    |
|                                                         | Height (m)               | 190 | 1.66   | 0.15  | 1.68   | 1.01  | 1.94   | 0.47                 | 1.00                    | 260   | 1.61   | 0.13  | 1.64   | 1.13  | 1.82   | 0.40                 | 1.00                    |
|                                                         | WC (cm)                  | 130 | 102.87 | 17.03 | 102.00 | 50.00 | 152.00 | 0.86                 | 0.62                    | 180   | 96.12  | 16.08 | 94.00  | 45.00 | 150.00 | 0.85                 | 0.50                    |
|                                                         | Hip (cm)                 | 129 | 108.75 | 15.67 | 108.00 | 40.00 | 150.00 | 0.83                 | 0.66                    | 178   | 112.16 | 16.74 | 112.00 | 42.00 | 160.00 | 0.84                 | 0.62                    |
|                                                         | WHR (cm/cm)              | 129 | 0.95   | 0.08  | 0.93   | 0.75  | 1.25   | 0.23                 | 0.07                    | 178   | 0.86   | 0.12  | 0.85   | 0.55  | 2.07   | 0.08                 | -0.10                   |
| Essen Obesity Study (Essen Obesity Trio GWAS) Parents   | Age (yrs)                | 687 | 44.21  | 6.13  | 43.63  | 29.85 | 71.65  | 0.06                 | -0.20                   | 696   | 40.89  | 5.44  | 40.49  | 24.71 | 62.03  | 0.08                 | -0.13                   |
| Parents                                                 | BMI (kg/m <sup>2</sup> ) | 696 | 30.34  | 5.43  | 29.62  | 18.04 | 54.33  | 1.00                 | -0.02                   | 698   | 30.23  | 7.13  | 28.88  | 17.15 | 64.34  | 1.00                 | -0.10                   |
|                                                         | Weight (kg)              | 696 | 95.83  | 18.72 | 93.00  | 56.50 | 180.00 | 0.91                 | 0.40                    | 698   | 82.35  | 20.03 | 78.00  | 46.00 | 170.10 | 0.92                 | 0.28                    |
|                                                         | Height (m)               | 696 | 1.78   | 0.07  | 1.77   | 1.53  | 1.99   | -0.02                | 1.00                    | 698   | 1.65   | 0.07  | 1.65   | 1.01  | 1.83   | -0.10                | 1.00                    |
|                                                         | WC (cm)                  | 524 | 105.26 | 14.75 | 104.00 | 55.00 | 166.00 | 0.89                 | 0.13                    | 565   | 93.94  | 17.04 | 91.50  | 56.00 | 167.00 | 0.86                 | 0.06                    |
|                                                         | Hip (cm)                 | 524 | 107.91 | 10.98 | 106.50 | 51.00 | 158.00 | 0.81                 | 0.20                    | 565   | 111.24 | 15.74 | 109.00 | 55.50 | 223.00 | 0.83                 | 0.05                    |
|                                                         | WHR (cm/cm)              | 524 | 0.97   | 0.08  | 0.97   | 0.56  | 1.35   | 0.53                 | -0.05                   | 565   | 0.84   | 0.09  | 0.83   | 0.47  | 1.43   | 0.37                 | 0.02                    |
| Essen Obesity Study (Essen Obesity Trio GWAS) Offspring | Age (yrs)                | 318 | 13.31  | 2.98  | 13.43  | 4.19  | 24.90  | 0.42                 | 0.82                    | 387   | 13.54  | 3.04  | 13.71  | 3.76  | 22.18  | 0.55                 | 0.74                    |
| Offspring                                               | BMI (kg/m <sup>2</sup> ) | 318 | 31.60  | 5.52  | 30.86  | 18.74 | 64.70  | 1.00                 | 0.45                    | 387   | 32.36  | 6.04  | 31.21  | 19.73 | 56.75  | 1.00                 | 0.43                    |
|                                                         | Weight (kg)              | 316 | 86.50  | 25.51 | 85.30  | 21.30 | 214.30 | 0.87                 | 0.82                    | 386   | 84.76  | 23.58 | 84.00  | 26.00 | 174.00 | 0.90                 | 0.77                    |
|                                                         | Height (m)               | 316 | 1.64   | 0.15  | 1.66   | 1.07  | 1.95   | 0.45                 | 1.00                    | 386   | 1.60   | 0.13  | 1.63   | 1.06  | 1.84   | 0.43                 | 1.00                    |

Supplementary Table 4. Study-specific descriptive statistics for studies included in stage 2 and ancillary analyses

| Study                        | Trait                    | Men |        |       |        |       |        |                      |                         | Women |        |       |        |       |        |                      |                         |
|------------------------------|--------------------------|-----|--------|-------|--------|-------|--------|----------------------|-------------------------|-------|--------|-------|--------|-------|--------|----------------------|-------------------------|
|                              |                          | N   | Mean   | SD    | Median | Min   | Max    | Correlation with BMI | Correlation with height | N     | Mean   | SD    | Median | Min   | Max    | Correlation with BMI | Correlation with height |
|                              | WC (cm)                  | 250 | 100.31 | 14.41 | 99.50  | 57.00 | 142.00 | 0.81                 | 0.68                    | 300   | 95.43  | 13.23 | 95.00  | 55.00 | 150.00 | 0.83                 | 0.47                    |
|                              | Hip (cm)                 | 250 | 107.54 | 13.68 | 108.50 | 60.00 | 178.00 | 0.76                 | 0.71                    | 298   | 110.80 | 15.74 | 110.00 | 71.00 | 213.00 | 0.83                 | 0.63                    |
|                              | WHR (cm/cm)              | 250 | 0.93   | 0.08  | 0.93   | 0.64  | 1.34   | 0.21                 | 0.06                    | 298   | 0.86   | 0.08  | 0.86   | 0.46  | 1.18   | -0.01                | -0.25                   |
| French Extreme Obesity Study | Age (yrs)                | 591 | 11.61  | 2.66  | 11.83  | 4.00  | 17.00  | 0.22                 | 0.85                    | 662   | 11.39  | 2.95  | 11.42  | 2.00  | 17.17  | 0.29                 | 0.85                    |
| Children                     | BMI (kg/m <sup>2</sup> ) | 591 | 23.76  | 7.97  | 21.69  | 12.82 | 70.76  | 1.00                 | 0.43                    | 662   | 24.29  | 8.04  | 22.54  | 12.95 | 59.52  | 1.00                 | 0.40                    |
|                              | Weight (kg)              | 591 | 57.70  | 28.24 | 51.00  | 19.60 | 237.00 | 0.91                 | 0.74                    | 662   | 56.24  | 25.96 | 49.00  | 18.49 | 166.00 | 0.92                 | 0.70                    |
|                              | Height (m)               | 591 | 1.53   | 0.16  | 1.52   | 1.15  | 1.97   | 0.43                 | 1.00                    | 662   | 1.49   | 0.15  | 1.52   | 0.95  | 1.83   | 0.40                 | 1.00                    |
|                              | WC (cm)                  | 533 | 79.78  | 21.79 | 73.00  | 46.00 | 170.00 | 0.94                 | 0.54                    | 589   | 76.15  | 20.46 | 69.00  | 47.00 | 155.00 | 0.92                 | 0.43                    |
|                              | WHR (cm/cm)              | 530 | 0.89   | 0.10  | 0.87   | 0.71  | 1.58   | 0.61                 | 0.05                    | 588   | 0.84   | 0.12  | 0.82   | 0.63  | 2.35   | 0.41                 | -0.19                   |
|                              | Hip (cm)                 | 530 | 88.67  | 18.53 | 87.00  | 56.96 | 200.00 | 0.91                 | 0.67                    | 588   | 90.16  | 18.70 | 87.00  | 57.00 | 155.00 | 0.90                 | 0.67                    |
| French Extreme Obesity Study | Age (yrs)                | 318 | 49.48  | 9.07  | 50.00  | 20.00 | 69.00  | -0.39                | -0.29                   | 1055  | 46.58  | 10.63 | 47.00  | 19.00 | 77.00  | -0.21                | -0.27                   |
| Adult                        | BMI (kg/m <sup>2</sup> ) | 318 | 34.18  | 13.70 | 24.60  | 20.40 | 83.86  | 1.00                 | 0.16                    | 1055  | 34.00  | 13.91 | 24.80  | 16.60 | 87.24  | 1.00                 | 0.11                    |
|                              | Weight (kg)              | 318 | 104.51 | 44.06 | 78.00  | 51.00 | 270.00 | 0.98                 | 0.35                    | 1055  | 88.59  | 37.86 | 67.00  | 40.00 | 231.80 | 0.98                 | 0.30                    |
|                              | Height (m)               | 318 | 1.74   | 0.07  | 1.74   | 1.55  | 1.95   | 0.16                 | 1.00                    | 1055  | 1.61   | 0.06  | 1.61   | 1.43  | 1.80   | 0.11                 | 1.00                    |
|                              | WC (cm)                  | 310 | 109.84 | 31.35 | 92.00  | 73.00 | 200.00 | 0.97                 | 0.25                    | 984   | 96.38  | 30.18 | 79.00  | 57.00 | 195.00 | 0.96                 | 0.18                    |
|                              | WHR (cm/cm)              | 310 | 0.94   | 0.10  | 0.92   | 0.75  | 1.46   | 0.56                 | 0.12                    | 982   | 0.83   | 0.10  | 0.80   | 0.59  | 1.41   | 0.64                 | 0.07                    |
|                              | Hip (cm)                 | 310 | 115.31 | 27.42 | 99.05  | 84.01 | 245.00 | 0.94                 | 0.25                    | 981   | 114.83 | 26.58 | 101.00 | 70.00 | 204.00 | 0.96                 | 0.20                    |
| GEO-IT                       | Age (yrs)                | 680 | 40.17  | 11.43 | 39     | 19    | 73     | 0.06                 | -                       | 1112  | 39.1   | 9.8   | 38.0   | 19.0  | 66.0   | 0.2                  | -                       |
| Controls                     | BMI (kg/m <sup>2</sup> ) | 680 | 21.7   | 1.55  | 22     | 16    | 24.5   | 1                    | -                       | 1112  | 20.9   | 1.7   | 21.0   | 14.0  | 24.0   | 1                    | -                       |
|                              | Weight (kg)              | -   | -      | -     | -      | -     | -      | -                    | -                       | -     | -      | -     | -      | -     | -      | -                    | -                       |
|                              | Height (m)               | -   | -      | -     | -      | -     | -      | -                    | -                       | -     | -      | -     | -      | -     | -      | -                    | -                       |
|                              | WC (cm)                  | -   | -      | -     | -      | -     | -      | -                    | -                       | -     | -      | -     | -      | -     | -      | -                    | -                       |
|                              | Hip (cm)                 | -   | -      | -     | -      | -     | -      | -                    | -                       | -     | -      | -     | -      | -     | -      | -                    | -                       |
|                              | WHR (cm/cm)              | -   | -      | -     | -      | -     | -      | -                    | -                       | -     | -      | -     | -      | -     | -      | -                    | -                       |
| GEO-IT                       | Age (yrs)                | 580 | 47.89  | 14    | 48     | 18    | 82     | -0.21                | -0.26                   | 1137  | 52.9   | 14.6  | 55.0   | 18.0  | 85.0   | -0.1                 | -0.37                   |
| Cases                        | BMI (kg/m <sup>2</sup> ) | 580 | 47.49  | 6.86  | 45.91  | 40    | 85.6   | 1                    | 0.05                    | 1137  | 47.3   | 6.4   | 46.0   | 40.5  | 82.7   | 1                    | -0.06                   |
|                              | Weight (kg)              | 580 | 142.96 | 24.78 | 138    | 96.4  | 265    | 0.86                 | 0.54                    | 1137  | 117.8  | 18.7  | 115.0  | 70.6  | 207.4  | 0.81                 | 0.51                    |
|                              | Height (m)               | 580 | 1.73   | 0.08  | 1.73   | 1.43  | 1.98   | 0.05                 | 1                       | 1137  | 1.58   | 0.07  | 1.58   | 1.30  | 1.82   | -0.06                | 1                       |

**Supplementary Table 4. Study-specific descriptive statistics for studies included in stage 2 and ancillary analyses**

| Study | Trait                    | Men |        |       |        |      |      |                      |                         | Women |       |      |        |       |       |                      |                         |
|-------|--------------------------|-----|--------|-------|--------|------|------|----------------------|-------------------------|-------|-------|------|--------|-------|-------|----------------------|-------------------------|
|       |                          | N   | Mean   | SD    | Median | Min  | Max  | Correlation with BMI | Correlation with height | N     | Mean  | SD   | Median | Min   | Max   | Correlation with BMI | Correlation with height |
|       | WC (cm)                  | 580 | 141.82 | 13.4  | 140    | 110  | 197  | 0.82                 | 0.28                    | 1137  | 126.4 | 13.2 | 125.0  | 90.0  | 260.0 | 0.69                 | 0.13                    |
|       | Hip (cm)                 | 580 | 139.06 | 15.76 | 137    | 90   | 202  | 0.81                 | 0.22                    | 1137  | 140.7 | 13.4 | 139.0  | 108.0 | 290.0 | 0.79                 | 0.11                    |
|       | WHR (cm/cm)              | 580 | 1.02   | 0.07  | 1.02   | 0.77 | 1.33 | -0.17                | 0.01                    | 1137  | 0.89  | 0.07 | 0.9    | 0.61  | 1.22  | -0.03                | -0.01                   |
| GOYA  | Age (yrs)                | 808 | 20     | 1.9   | 19     | 18   | 31   | 0.1                  | 0.06                    | 86219 | 29.6  | 4.3  | 29.4   | 15.6  | 47.0  | -0.02                | 0.01                    |
|       | BMI (kg/m <sup>2</sup> ) | 808 | 21.7   | 2.5   | 21.3   | 15.7 | 36.2 | 1                    | -0.08                   | 79322 | 23.6  | 4.2  | 22.6   | 13.9  | 64.4  | 1.00                 | -0.05                   |
|       | Weight (kg)              | 808 | 67.8   | 8.9   | 67     | 47   | 116  | 0.83                 | 0.5                     | 79393 | 67.1  | 12.8 | 65.0   | 38.0  | 177.0 | 0.92                 | 0.33                    |
|       | Height (m)               | 808 | 1.77   | 0.07  | 1.77   | 1.57 | 1.96 | -0.08                | 1                       | 80622 | 1.69  | 0.06 | 1.69   | 1.42  | 1.98  | -0.05                | 1.00                    |
|       | WC (cm)                  | na  | na     | na    | na     | na   | na   | na                   | na                      | na    | na    | na   | na     | na    | na    | na                   | na                      |
|       | Hip (cm)                 | na  | na     | na    | na     | na   | na   | na                   | na                      | na    | na    | na   | na     | na    | na    | na                   | na                      |
|       | WHR (cm/cm)              | na  | na     | na    | na     | na   | na   | na                   | na                      | na    | na    | na   | na     | na    | na    | na                   | na                      |

**Supplementary Table 5. Number of individuals in each study for the tails and clinical class of obesity categories**

| Study name       |        | Normal-weight | Overweight | Obese class I | Obese class II | Obese class III | Height tails                            |                                      | BMI tails                               |                                      | WHR tails                               |                                      |
|------------------|--------|---------------|------------|---------------|----------------|-----------------|-----------------------------------------|--------------------------------------|-----------------------------------------|--------------------------------------|-----------------------------------------|--------------------------------------|
|                  |        | BMI < 25      | BMI ≥ 25   | BMI ≥ 30      | BMI ≥ 35       | BMI ≥ 40        | 95 <sup>th</sup> -100 <sup>th</sup> pct | 0 <sup>th</sup> -5 <sup>th</sup> pct | 95 <sup>th</sup> -100 <sup>th</sup> pct | 0 <sup>th</sup> -5 <sup>th</sup> pct | 95 <sup>th</sup> -100 <sup>th</sup> pct | 0 <sup>th</sup> -5 <sup>th</sup> pct |
|                  |        | N             | N          | N             | N              | N               | N                                       | N                                    | N                                       | N                                    | N                                       | N                                    |
| <b>Stage 1:</b>  |        |               |            |               |                |                 |                                         |                                      |                                         |                                      |                                         |                                      |
| ADVANCE Controls | Men    | 43            | 85         | 24            | 7              | 2               | 7                                       | 7                                    | 7                                       | 7                                    | -                                       | -                                    |
|                  | Women  | 103           | 82         | 38            | 15             | 11              | 10                                      | 10                                   | 10                                      | 10                                   | -                                       | -                                    |
|                  | Pooled | 146           | 167        | 62            | 22             | 13              | 17                                      | 17                                   | 17                                      | 17                                   | -                                       | -                                    |
| ADVANCE Cases    | Men    | 14            | 100        | 68            | 27             | 9               | 6                                       | 6                                    | 6                                       | 6                                    | -                                       | -                                    |
|                  | Women  | 44            | 117        | 84            | 53             | 20              | 9                                       | 9                                    | 9                                       | 9                                    | -                                       | -                                    |
|                  | Pooled | 58            | 217        | 152           | 80             | 29              | 15                                      | 15                                   | 15                                      | 15                                   | -                                       | -                                    |
| AGES             | Men    | 590           | 761        | 93            | -              | -               | 68                                      | 68                                   | 68                                      | 68                                   | -                                       | -                                    |
|                  | Women  | 1087          | 1087       | 169           | -              | -               | 94                                      | 96                                   | 93                                      | 93                                   | -                                       | -                                    |
|                  | Pooled | 1677          | 1848       | 262           | 47             | 8               | 162                                     | 164                                  | 161                                     | 161                                  | -                                       | -                                    |
| ARIC             | Men    | 1017          | 2815       | 855           | 168            | 36              | 192                                     | 192                                  | 191                                     | 191                                  | 191                                     | 191                                  |
|                  | Women  | 1987          | 2301       | 1000          | 365            | 112             | 214                                     | 214                                  | 215                                     | 215                                  | 215                                     | 215                                  |
|                  | Pooled | 3004          | 5116       | 1855          | 533            | 148             | 406                                     | 406                                  | 406                                     | 406                                  | 406                                     | 406                                  |
| B58C-T1DGC       | Men    | 281           | 978        | 341           | 76             | 14              | 64                                      | 64                                   | 63                                      | 63                                   | 60                                      | 60                                   |
|                  | Women  | 579           | 749        | 304           | 120            | 53              | 67                                      | 67                                   | 67                                      | 67                                   | 65                                      | 65                                   |
|                  | Pooled | 860           | 1727       | 645           | 196            | 67              | 131                                     | 131                                  | 130                                     | 130                                  | 125                                     | 125                                  |
| B58C-WTCCC       | Men    | 194           | 547        | 191           | 48             | 7               | 38                                      | 38                                   | 38                                      | 38                                   | 35                                      | 35                                   |
|                  | Women  | 324           | 414        | 181           | 57             | 20              | 37                                      | 37                                   | 37                                      | 37                                   | 37                                      | 37                                   |
|                  | Pooled | 518           | 961        | 372           | 105            | 27              | 75                                      | 75                                   | 75                                      | 75                                   | 72                                      | 72                                   |
| BRIGHT           | Men    | 149           | 570        | 176           | -              | -               | 36                                      | 36                                   | 36                                      | 36                                   | 34                                      | 34                                   |
|                  | Women  | 319           | 768        | 282           | -              | -               | 55                                      | 55                                   | 55                                      | 55                                   | 50                                      | 50                                   |
|                  | Pooled | 468           | -          | -             | 49             | -               | -                                       | -                                    | -                                       | -                                    | -                                       | -                                    |
| CAD WTCCC        | Men    | 419           | 1109       | 345           | 62             | 10              | 59                                      | 58                                   | 57                                      | 57                                   | -                                       | -                                    |
|                  | Women  | 123           | 276        | 103           | 35             | 10              | 19                                      | 19                                   | 19                                      | 19                                   | -                                       | -                                    |
|                  | Pooled | 542           | 1385       | 448           | 97             | 20              | 78                                      | 77                                   | 76                                      | 76                                   | -                                       | -                                    |
| CASP1 controls   | Men    | 172           | 311        | 306           | 67             | 7               | 25                                      | 25                                   | 24                                      | 24                                   | -                                       | -                                    |
|                  | Women  | -             | -          | -             | -              | -               | -                                       | -                                    | -                                       | -                                    | -                                       | -                                    |
|                  | Pooled | -             | -          | -             | -              | -               | -                                       | -                                    | -                                       | -                                    | -                                       | -                                    |
| CASP1 cases      | Men    | 178           | 306        | 69            | 9              | -               | 24                                      | 24                                   | 24                                      | 24                                   | -                                       | -                                    |
|                  | Women  | -             | -          | -             | -              | -               | -                                       | -                                    | -                                       | -                                    | -                                       | -                                    |

**Supplementary Table 5. Number of individuals in each study for the tails and clinical class of obesity categories**

| Study name        |        | Normal-weight | Overweight | Obese class I | Obese class II | Obese class III | Height tails                            |                                      | BMI tails                               |                                      | WHR tails                               |                                      |
|-------------------|--------|---------------|------------|---------------|----------------|-----------------|-----------------------------------------|--------------------------------------|-----------------------------------------|--------------------------------------|-----------------------------------------|--------------------------------------|
|                   |        | BMI < 25      | BMI ≥ 25   | BMI ≥ 30      | BMI ≥ 35       | BMI ≥ 40        | 95 <sup>th</sup> -100 <sup>th</sup> pct | 0 <sup>th</sup> -5 <sup>th</sup> pct | 95 <sup>th</sup> -100 <sup>th</sup> pct | 0 <sup>th</sup> -5 <sup>th</sup> pct | 95 <sup>th</sup> -100 <sup>th</sup> pct | 0 <sup>th</sup> -5 <sup>th</sup> pct |
|                   |        | N             | N          | N             | N              | N               | N                                       | N                                    | N                                       | N                                    | N                                       | N                                    |
|                   | Pooled | -             | -          | -             | -              | -               | -                                       | -                                    | -                                       | -                                    | -                                       | -                                    |
| CASP2 controls    | Men    | 202           | 298        | 53            | 5              | 3               | 26                                      | 26                                   | 25                                      | 25                                   | -                                       | -                                    |
|                   | Women  | -             | -          | -             | -              | -               | -                                       | -                                    | -                                       | -                                    | -                                       | -                                    |
|                   | Pooled | -             | -          | -             | -              | -               | -                                       | -                                    | -                                       | -                                    | -                                       | -                                    |
| CASP2 cases       | Men    | 538           | 885        | 190           | 17             | 2               | 73                                      | 73                                   | 71                                      | 71                                   | -                                       | -                                    |
|                   | Women  | -             | -          | -             | -              | -               | -                                       | -                                    | -                                       | -                                    | -                                       | -                                    |
|                   | Pooled | -             | -          | -             | -              | -               | -                                       | -                                    | -                                       | -                                    | -                                       | -                                    |
| CHS               | Men    | 459           | 817        | 189           | 19             | 5               | 65                                      | 68                                   | 64                                      | 63                                   | 63                                      | 64                                   |
|                   | Women  | 845           | 1107       | 374           | 104            | 31              | 113                                     | 99                                   | 98                                      | 97                                   | 98                                      | 98                                   |
|                   | Pooled | 1304          | 1924       | 563           | 123            | 36              | 178                                     | 167                                  | 162                                     | 160                                  | 161                                     | 162                                  |
| CoLaus            | Men    | 941           | 1619       | 444           | 93             | 19              | 155                                     | 141                                  | 130                                     | 127                                  | 127                                     | 127                                  |
|                   | Women  | 1626          | 1248       | 425           | 131            | 37              | 157                                     | 198                                  | 144                                     | 146                                  | 144                                     | 143                                  |
|                   | Pooled | 2567          | 2867       | 869           | 224            | 56              | 306                                     | 343                                  | 277                                     | 281                                  | 271                                     | 270                                  |
| COROGENE controls | Men    | 302           | 703        | 214           | 44             | 9               | 51                                      | 51                                   | 51                                      | 51                                   | 51                                      | 51                                   |
|                   | Women  | 370           | 510        | 184           | 62             | 17              | 44                                      | 44                                   | 44                                      | 44                                   | 44                                      | 44                                   |
|                   | Pooled | 672           | 1213       | 398           | 106            | 26              | 95                                      | 95                                   | 95                                      | 95                                   | 95                                      | 95                                   |
| COROGENE cases    | Men    | 360           | 814        | 265           | 75             | 17              | 57                                      | 57                                   | 57                                      | 57                                   | 0                                       | 0                                    |
|                   | Women  | 233           | 347        | 147           | 43             | 12              | 28                                      | 28                                   | 28                                      | 28                                   | 0                                       | 0                                    |
|                   | Pooled | 593           | 1161       | 412           | 118            | 29              | 85                                      | 85                                   | 85                                      | 85                                   | 0                                       | 0                                    |
| deCODE            | Men    | 2597          | 6616       | 2447          | 646            | 187             | 450                                     | 453                                  | 465                                     | 465                                  | 145                                     | 132                                  |
|                   | Women  | 7403          | 10183      | 4128          | 1361           | 436             | 870                                     | 867                                  | 875                                     | 875                                  | 149                                     | 145                                  |
|                   | Pooled | 10000         | 16799      | 6575          | 2007           | 623             | 1320                                    | 1320                                 | 1340                                    | 1340                                 | 294                                     | 277                                  |
| DGI Controls      | Men    | 182           | 387        | 81            | -              | -               | 28                                      | 28                                   | 29                                      | 29                                   | 12                                      | 12                                   |
|                   | Women  | 201           | 345        | 107           | -              | -               | 29                                      | 29                                   | 28                                      | 28                                   | 11                                      | 11                                   |
|                   | Pooled | 383           | 732        | 188           | 27             | 6               | 57                                      | 57                                   | 57                                      | 57                                   | 23                                      | 23                                   |
| DGI Cases         | Men    | 145           | 551        | 81            | -              | -               | 32                                      | 32                                   | 35                                      | 35                                   | 26                                      | 25                                   |
|                   | Women  | 144           | 490        | 214           | -              | -               | 35                                      | 35                                   | 32                                      | 32                                   | 23                                      | 23                                   |
|                   | Pooled | 289           | 1041       | 295           | 90             | 16              | 67                                      | 67                                   | 67                                      | 67                                   | 49                                      | 48                                   |
| EGCUT             | Men    | 531           | 587        | 170           | 38             | 5               | 56                                      | 56                                   | 56                                      | 57                                   | 31                                      | 32                                   |
|                   | Women  | 641           | 521        | 215           | 82             | 14              | 59                                      | 59                                   | 63                                      | 57                                   | 36                                      | 36                                   |

Supplementary Table 5. Number of individuals in each study for the tails and clinical class of obesity categories

| Study name       |        | Normal-weight | Overweight | Obese class I | Obese class II | Obese class III | Height tails                            |                                      | BMI tails                               |                                      | WHR tails                               |                                      |
|------------------|--------|---------------|------------|---------------|----------------|-----------------|-----------------------------------------|--------------------------------------|-----------------------------------------|--------------------------------------|-----------------------------------------|--------------------------------------|
|                  |        | BMI < 25      | BMI ≥ 25   | BMI ≥ 30      | BMI ≥ 35       | BMI ≥ 40        | 95 <sup>th</sup> -100 <sup>th</sup> pct | 0 <sup>th</sup> -5 <sup>th</sup> pct | 95 <sup>th</sup> -100 <sup>th</sup> pct | 0 <sup>th</sup> -5 <sup>th</sup> pct | 95 <sup>th</sup> -100 <sup>th</sup> pct | 0 <sup>th</sup> -5 <sup>th</sup> pct |
|                  |        | N             | N          | N             | N              | N               | N                                       | N                                    | N                                       | N                                    | N                                       | N                                    |
|                  | Pooled | 1172          | 1108       | 385           | 120            | 29              | 115                                     | 115                                  | 119                                     | 114                                  | 67                                      | 68                                   |
| EPIC - Obesity   | Men    | 348           | 782        | 156           | 21             | 2               | 57                                      | 56                                   | 57                                      | 56                                   | 57                                      | 56                                   |
|                  | Women  | 572           | 712        | 223           | 56             | 14              | 68                                      | 63                                   | 65                                      | 64                                   | 65                                      | 64                                   |
|                  | Pooled | 920           | 1494       | 379           | 77             | 16              | 125                                     | 119                                  | 122                                     | 120                                  | 122                                     | 120                                  |
| ERF              | Men    | 265           | 644        | 189           | 38             | 5               | 45                                      | 45                                   | 45                                      | 45                                   | 45                                      | 45                                   |
|                  | Women  | 527           | 668        | 241           | 73             | 4               | 59                                      | 59                                   | 59                                      | 59                                   | 59                                      | 59                                   |
|                  | Pooled | 792           | 1312       | 430           | 111            | 9               | -                                       | -                                    | -                                       | -                                    | -                                       | -                                    |
| FamHS            | Men    | 90            | 326        | 123           | -              | -               | -                                       | -                                    | -                                       | -                                    | -                                       | -                                    |
|                  | Women  | 180           | 260        | 126           | -              | -               | -                                       | -                                    | -                                       | -                                    | -                                       | -                                    |
|                  | Pooled | 270           | 586        | 249           | 63             | 25              | 43                                      | 42                                   | 43                                      | 43                                   | 43                                      | 43                                   |
| FENLAND          | Men    | 156           | 459        | 131           | 24             | 10              | 31                                      | 31                                   | 31                                      | 31                                   | 31                                      | 31                                   |
|                  | Women  | 358           | 429        | 177           | 61             | 21              | 40                                      | 40                                   | 40                                      | 40                                   | 40                                      | 40                                   |
|                  | Pooled | 514           | 888        | 308           | 85             | 31              | 71                                      | 71                                   | 71                                      | 71                                   | 71                                      | 71                                   |
| FRAM             | Men    | 1284          | 2566       | 732           | 171            | 39              | 232                                     | 202                                  | 127                                     | 171                                  | 39                                      | 55                                   |
|                  | Women  | 2908          | 1620       | 616           | 243            | 86              | 172                                     | 202                                  | 310                                     | 255                                  | 124                                     | 107                                  |
|                  | Pooled | 4192          | 4186       | 1348          | 414            | 125             | 404                                     | 404                                  | 437                                     | 426                                  | 163                                     | 162                                  |
| FUSION Controls  | Men    | 180           | 392        | 104           | -              | -               | 28                                      | 28                                   | 28                                      | 28                                   | 28                                      | <b>29</b>                            |
|                  | Women  | 192           | 407        | 138           | -              | -               | 30                                      | 29                                   | 30                                      | 30                                   | 29                                      | 29                                   |
|                  | Pooled | 372           | 799        | 242           | 35             | 5               | 58                                      | 57                                   | 58                                      | 58                                   | 57                                      | 58                                   |
| FUSION Cases     | Men    | 79            | 424        | 265           | -              | -               | 31                                      | 31                                   | 31                                      | 31                                   | 31                                      | <b>31</b>                            |
|                  | Women  | 45            | 544        | 263           | -              | -               | 22                                      | 24                                   | 23                                      | 23                                   | 23                                      | 24                                   |
|                  | Pooled | 124           | 968        | 528           | 155            | 36              | 53                                      | 55                                   | 54                                      | 54                                   | 54                                      | 55                                   |
| GENMETS Controls | Men    | 231           | 218        | 34            | 5              | 0               | 21                                      | 20                                   | 21                                      | 20                                   | 21                                      | 20                                   |
|                  | Women  | 276           | 214        | 59            | 11             | 3               | 22                                      | 21                                   | 23                                      | 23                                   | 24                                      | 22                                   |
|                  | Pooled | 507           | 432        | 93            | 16             | 3               | 43                                      | 41                                   | 44                                      | 43                                   | 45                                      | 42                                   |
| GENMETS Cases    | Men    | 30            | 438        | 171           | 39             | 8               | 21                                      | 20                                   | 22                                      | 21                                   | 22                                      | 23                                   |
|                  | Women  | 85            | 393        | 207           | 68             | 20              | 22                                      | 21                                   | 23                                      | 23                                   | 23                                      | 22                                   |
|                  | Pooled | 115           | 831        | 378           | 107            | 28              | 43                                      | 41                                   | 45                                      | 44                                   | 45                                      | 45                                   |
| GerMIFS1         | Men    | 154           | 487        | 138           | 20             | -               | 32                                      | 32                                   | 32                                      | 32                                   | -                                       | -                                    |



**Supplementary Table 5. Number of individuals in each study for the tails and clinical class of obesity categories**

| Study name     | Normal-weight | Overweight | Obese class I | Obese class II | Obese class III | Height tails                            |                                      | BMI tails                               |                                      | WHR tails                               |                                      |    |
|----------------|---------------|------------|---------------|----------------|-----------------|-----------------------------------------|--------------------------------------|-----------------------------------------|--------------------------------------|-----------------------------------------|--------------------------------------|----|
|                | BMI < 25      | BMI ≥ 25   | BMI ≥ 30      | BMI ≥ 35       | BMI ≥ 40        | 95 <sup>th</sup> -100 <sup>th</sup> pct | 0 <sup>th</sup> -5 <sup>th</sup> pct | 95 <sup>th</sup> -100 <sup>th</sup> pct | 0 <sup>th</sup> -5 <sup>th</sup> pct | 95 <sup>th</sup> -100 <sup>th</sup> pct | 0 <sup>th</sup> -5 <sup>th</sup> pct |    |
|                | N             | N          | N             | N              | N               | N                                       | N                                    | N                                       | N                                    | N                                       | N                                    |    |
|                | Women         | 96         | 213           | 81             | 16              | -                                       | 16                                   | 15                                      | 16                                   | 16                                      | -                                    | -  |
|                | Pooled        | 250        | 700           | 219            | 36              | -                                       | -                                    | -                                       | -                                    | -                                       | -                                    | -  |
| GerMIFS2       | Men           | 280        | 672           | 212            | 27              | -                                       | 43                                   | 43                                      | 43                                   | 43                                      | -                                    | -  |
|                | Women         | 86         | 153           | 69             | 21              | -                                       | 11                                   | 11                                      | 11                                   | 11                                      | -                                    | -  |
|                | Pooled        | 366        | 825           | 281            | 48              | -                                       | -                                    | -                                       | -                                    | -                                       | -                                    | -  |
| GOOD           | Men           | 795        | 143           | 30             | 5               | 1                                       | 47                                   | 48                                      | 47                                   | 47                                      | 48                                   | 50 |
|                | Women         | -          | -             | -              | -               | -                                       | -                                    | -                                       | -                                    | -                                       | -                                    | -  |
|                | Pooled        | -          | -             | -              | -               | -                                       | -                                    | -                                       | -                                    | -                                       | -                                    | -  |
| HBCS           | Men           | 194        | 378           | 123            | 30              | 9                                       | 37                                   | 37                                      | 37                                   | 37                                      | 37                                   | 37 |
|                | Women         | 316        | 399           | 179            | 66              | 24                                      | 50                                   | 50                                      | 50                                   | 50                                      | 50                                   | 50 |
|                | Pooled        | 510        | 777           | 302            | 96              | 33                                      | 87                                   | 87                                      | 87                                   | 87                                      | 87                                   | 87 |
| KORA S3        | Men           | 160        | 653           | 168            | 31              | 3                                       | 44                                   | 42                                      | 41                                   | 41                                      | 41                                   | 41 |
|                | Women         | 307        | 522           | 188            | 51              | 10                                      | 46                                   | 43                                      | 42                                   | 42                                      | 42                                   | 42 |
|                | Pooled        | 467        | 1175          | 356            | 82              | 13                                      | 90                                   | 85                                      | 83                                   | 83                                      | 83                                   | 83 |
| KORA S4        | Men           | 167        | 716           | 223            | 41              | 12                                      | 46                                   | 45                                      | 45                                   | 45                                      | 45                                   | 45 |
|                | Women         | 335        | 593           | 255            | 76              | 17                                      | 49                                   | 47                                      | 47                                   | 47                                      | 47                                   | 47 |
|                | Pooled        | 502        | 1309          | 478            | 117             | 29                                      | 95                                   | 92                                      | 92                                   | 92                                      | 92                                   | 92 |
| MGS            | Men           | 171        | 1076          | 597            | 247             | 90                                      | 53                                   | 98                                      | 63                                   | 61                                      | -                                    | -  |
|                | Women         | 312        | 1038          | 705            | 398             | 213                                     | 99                                   | 81                                      | 67                                   | 69                                      | -                                    | -  |
|                | Pooled        | 483        | 2114          | 1302           | 645             | 303                                     | 152                                  | 179                                     | 130                                  | 130                                     | -                                    | -  |
| MICROS         | Men           | 198        | 269           | 69             | 14              | 3                                       | 23                                   | 23                                      | 23                                   | 23                                      | 8                                    | 8  |
|                | Women         | 345        | 267           | 105            | 27              | 8                                       | 30                                   | 30                                      | 31                                   | 30                                      | 8                                    | 8  |
|                | Pooled        | 543        | 536           | 174            | 41              | 11                                      | 50                                   | 50                                      | 54                                   | 54                                      | 14                                   | 14 |
| Migen Cases    | Men           | 617        | 158           | 158            | -               | -                                       | 42                                   | 52                                      | 42                                   | 43                                      | -                                    | -  |
|                | Women         | 320        | 150           | 167            | -               | -                                       | 36                                   | 56                                      | 27                                   | 27                                      | -                                    | -  |
|                | Pooled        | 937        | 308           | 325            | 149             | -                                       | 78                                   | 108                                     | 69                                   | 70                                      | -                                    | -  |
| Migen Controls | Men           | 596        | 248           | 167            | -               | -                                       | 40                                   | 42                                      | 38                                   | 38                                      | -                                    | -  |
|                | Women         | 305        | 253           | 143            | -               | -                                       | 34                                   | 23                                      | 23                                   | 23                                      | -                                    | -  |
|                | Pooled        | 901        | 501           | 310            | 91              | -                                       | 74                                   | 65                                      | 61                                   | 61                                      | -                                    | -  |
| NBS WTCCC      | Men           | 241        | 458           | 119            | 22              | 7                                       | 36                                   | 35                                      | 34                                   | 33                                      | -                                    | -  |
|                | Women         | 390        | 356           | 114            | 28              | 7                                       | 36                                   | 35                                      | 36                                   | 35                                      | -                                    | -  |

**Supplementary Table 5. Number of individuals in each study for the tails and clinical class of obesity categories**

| Study name                 |        | Normal-weight | Overweight | Obese class I | Obese class II | Obese class III | Height tails                            |                                      | BMI tails                               |                                      | WHR tails                               |                                      |
|----------------------------|--------|---------------|------------|---------------|----------------|-----------------|-----------------------------------------|--------------------------------------|-----------------------------------------|--------------------------------------|-----------------------------------------|--------------------------------------|
|                            |        | BMI < 25      | BMI ≥ 25   | BMI ≥ 30      | BMI ≥ 35       | BMI ≥ 40        | 95 <sup>th</sup> -100 <sup>th</sup> pct | 0 <sup>th</sup> -5 <sup>th</sup> pct | 95 <sup>th</sup> -100 <sup>th</sup> pct | 0 <sup>th</sup> -5 <sup>th</sup> pct | 95 <sup>th</sup> -100 <sup>th</sup> pct | 0 <sup>th</sup> -5 <sup>th</sup> pct |
|                            |        | N             | N          | N             | N              | N               | N                                       | N                                    | N                                       | N                                    | N                                       | N                                    |
|                            | Pooled | 631           | 814        | 233           | 50             | 14              | 72                                      | 70                                   | 70                                      | 68                                   | -                                       | -                                    |
| NFBC66                     | Men    | 1183          | 1071       | 190           | 34             | 8               | 135                                     | 134                                  | 128                                     | 128                                  | 137                                     | 137                                  |
|                            | Women  | 1534          | 717        | 215           | 77             | 25              | 113                                     | 112                                  | 115                                     | 114                                  | 112                                     | 112                                  |
|                            | Pooled | 2717          | 1788       | 405           | 111            | 33              | 248                                     | 246                                  | 243                                     | 242                                  | 249                                     | 249                                  |
| NHS                        | Men    | -             | -          | -             | -              | -               | -                                       | -                                    | -                                       | -                                    | -                                       | -                                    |
|                            | Women  | 1419          | 868        | 278           | 76             | 20              | 113                                     | 124                                  | 273                                     | 106                                  | 772                                     | 79                                   |
|                            | Pooled | -             | -          | -             | -              | -               | -                                       | -                                    | -                                       | -                                    | -                                       | -                                    |
| NSPHS                      | Men    | 112           | 195        | 59            | 14             | 7               | 15                                      | 15                                   | 15                                      | 15                                   | -                                       | -                                    |
|                            | Women  | 170           | 170        | 61            | 20             | 5               | 17                                      | 17                                   | 17                                      | 16                                   | -                                       | -                                    |
|                            | Pooled | 282           | 365        | 120           | 34             | 12              | 32                                      | 32                                   | 32                                      | 32                                   | -                                       | -                                    |
| NTR and NESDA MDD Controls | Men    | 314           | 287        | 75            | 9              | 0               | 32                                      | 32                                   | 34                                      | 34                                   | 33                                      | 33                                   |
|                            | Women  | 670           | 324        | 88            | 26             | 7               | 54                                      | 30                                   | 54                                      | 55                                   | 55                                      | 55                                   |
|                            | Pooled | 984           | 611        | 163           | 35             | 7               | 73                                      | 64                                   | 89                                      | 89                                   | 89                                      | 89                                   |
| NTR and NESDA MDD Cases    | Men    | 216           | 215        | 79            | 12             | 6               | 26                                      | 24                                   | 26                                      | 25                                   | 26                                      | 26                                   |
|                            | Women  | 679           | 317        | 128           | 60             | 19              | 59                                      | 55                                   | 60                                      | 60                                   | 59                                      | 59                                   |
|                            | Pooled | 895           | 532        | 207           | 72             | 25              | 75                                      | 75                                   | 86                                      | 84                                   | 86                                      | 86                                   |
| ORCADES                    | Men    | 71            | 254        | 94            | 19             | 7               | 16                                      | 16                                   | 16                                      | 16                                   | 18                                      | 18                                   |
|                            | Women  | 132           | 240        | 95            | 35             | 13              | 18                                      | 18                                   | 19                                      | 19                                   | 18                                      | 18                                   |
|                            | Pooled | 203           | 494        | 189           | 54             | 20              | 35                                      | 35                                   | 35                                      | 35                                   | 34                                      | 34                                   |
| PLCO                       | Men    | 579           | 1659       | 504           | 85             | 14              | 113                                     | 113                                  | 112                                     | 112                                  | -                                       | -                                    |
|                            | Women  | -             | -          | -             | -              | -               | -                                       | -                                    | -                                       | -                                    | -                                       | -                                    |
|                            | Pooled | -             | -          | -             | -              | -               | -                                       | -                                    | -                                       | -                                    | -                                       | -                                    |
| PROCARDIS                  | Men    | 457           | 1407       | 421           | 75             | 11              | <b>94</b>                               | <b>94</b>                            | 94                                      | 94                                   | <b>31</b>                               | <b>30</b>                            |
|                            | Women  | 283           | 373        | 150           | 48             | 11              | 33                                      | 33                                   | 33                                      | 33                                   | 17                                      | 18                                   |
|                            | Pooled | 740           | 1780       | 571           | 123            | 22              | 127                                     | 127                                  | 127                                     | 127                                  | 48                                      | 48                                   |
| RUNMC                      | Men    | 767           | 1010       | 171           | 34             | 8               | 91                                      | 86                                   | 88                                      | 91                                   | -                                       | -                                    |
|                            | Women  | 506           | 506        | 134           | 33             | 11              | 53                                      | 58                                   | 56                                      | 53                                   | -                                       | -                                    |
|                            | Pooled | 1273          | 1516       | 305           | 67             | 19              | 144                                     | 144                                  | 144                                     | 144                                  | -                                       | -                                    |

**Supplementary Table 5. Number of individuals in each study for the tails and clinical class of obesity categories**

| Study name      |        | Normal-weight | Overweight | Obese class I | Obese class II | Obese class III | Height tails                            |                                      | BMI tails                               |                                      | WHR tails                               |                                      |
|-----------------|--------|---------------|------------|---------------|----------------|-----------------|-----------------------------------------|--------------------------------------|-----------------------------------------|--------------------------------------|-----------------------------------------|--------------------------------------|
|                 |        | BMI < 25      | BMI ≥ 25   | BMI ≥ 30      | BMI ≥ 35       | BMI ≥ 40        | 95 <sup>th</sup> -100 <sup>th</sup> pct | 0 <sup>th</sup> -5 <sup>th</sup> pct | 95 <sup>th</sup> -100 <sup>th</sup> pct | 0 <sup>th</sup> -5 <sup>th</sup> pct | 95 <sup>th</sup> -100 <sup>th</sup> pct | 0 <sup>th</sup> -5 <sup>th</sup> pct |
|                 |        | N             | N          | N             | N              | N               | N                                       | N                                    | N                                       | N                                    | N                                       | N                                    |
| RS1             | Men    | 993           | 1399       | 177           | 8              | 0               | 118                                     | 118                                  | 118                                     | 118                                  | 112                                     | 112                                  |
|                 | Women  | 1219          | 2152       | 649           | 113            | 18              | 169                                     | 165                                  | 169                                     | 168                                  | 157                                     | 156                                  |
|                 | Pooled | 2212          | 3551       | 826           | 121            | 18              | -                                       | -                                    | -                                       | -                                    | -                                       | -                                    |
| SASBAC controls | Men    | -             | -          | -             | -              | -               | -                                       | -                                    | -                                       | -                                    | -                                       | -                                    |
|                 | Women  | 356           | 399        | 89            | 19             | 4               | 38                                      | 37                                   | 38                                      | 38                                   | -                                       | -                                    |
|                 | Pooled | -             | -          | -             | -              | -               | -                                       | -                                    | -                                       | -                                    | -                                       | -                                    |
| SASBAC cases    | Men    | -             | -          | -             | -              | -               | -                                       | -                                    | -                                       | -                                    | -                                       | -                                    |
|                 | Women  | 377           | 416        | 102           | 22             | 6               | 40                                      | 39                                   | 40                                      | 40                                   | -                                       | -                                    |
|                 | Pooled | -             | -          | -             | -              | -               | -                                       | -                                    | -                                       | -                                    | -                                       | -                                    |
| SardiNIA        | Men    | 87            | 336        | 124           | 20             | 1               | 22                                      | 22                                   | 22                                      | 22                                   | 22                                      | 22                                   |
|                 | Women  | 158           | 307        | 132           | 34             | 13              | 24                                      | 24                                   | 24                                      | 24                                   | 24                                      | 24                                   |
|                 | Pooled | 245           | 643        | 256           | 54             | 14              | 45                                      | 50                                   | 45                                      | 50                                   | 45                                      | 50                                   |
| SEARCH          | Men    | -             | -          | -             | -              | -               | -                                       | -                                    | -                                       | -                                    | -                                       | -                                    |
|                 | Women  | 637           | 919        | 368           | 113            | 41              | 79                                      | 79                                   | 78                                      | 78                                   | -                                       | -                                    |
|                 | Pooled | -             | -          | -             | -              | -               | -                                       | -                                    | -                                       | -                                    | -                                       | -                                    |
| SHIP            | Men    | 514           | 1491       | 507           | 86             | 13              | 100                                     | 100                                  | 100                                     | 100                                  | 100                                     | 100                                  |
|                 | Women  | 866           | 1199       | 535           | 181            | 37              | 102                                     | 102                                  | 103                                     | 103                                  | 103                                     | 103                                  |
|                 | Pooled | 1380          | 2690       | 1042          | 267            | 50              | 202                                     | 202                                  | 203                                     | 203                                  | 203                                     | 203                                  |
| Sorbs           | Men    | 117           | 271        | 76            | 14             | 5               | 19                                      | 19                                   | 19                                      | 19                                   | 19                                      | 19                                   |
|                 | Women  | 242           | 311        | 139           | 43             | 17              | 27                                      | 27                                   | 27                                      | 27                                   | 27                                      | 27                                   |
|                 | Pooled | 359           | 582        | 215           | 57             | 22              | 46                                      | 46                                   | 46                                      | 46                                   | 46                                      | 46                                   |
| TWINSUK         | Men    | -             | -          | -             | -              | -               | -                                       | -                                    | -                                       | -                                    | -                                       | -                                    |
|                 | Women  | 872           | 605        | 185           | 67             | 24              | 76                                      | 79                                   | 74                                      | 74                                   | 55                                      | 56                                   |
|                 | Pooled | -             | -          | -             | -              | -               | -                                       | -                                    | -                                       | -                                    | -                                       | -                                    |
| T2D WTCCC       | Men    | 171           | 947        | 526           | 179            | 64              | 46                                      | 46                                   | 51                                      | 50                                   | 48                                      | 47                                   |
|                 | Women  | 104           | 702        | 476           | 261            | 114             | 40                                      | 40                                   | 40                                      | 40                                   | 39                                      | 39                                   |
|                 | Pooled | 275           | 1649       | 1002          | 440            | 178             | 86                                      | 86                                   | 91                                      | 90                                   | 87                                      | 86                                   |
| VIS             | Men    | 76            | 249        | 81            | 8              | 2               | 16                                      | 16                                   | 16                                      | 16                                   | 16                                      | 16                                   |
|                 | Women  | 154           | 291        | 122           | 24             | 4               | 22                                      | 22                                   | 23                                      | 23                                   | 22                                      | 22                                   |
|                 | Pooled | 230           | 540        | 203           | 32             | 5               | 39                                      | 39                                   | 39                                      | 39                                   | 39                                      | 39                                   |

**Supplementary Table 5. Number of individuals in each study for the tails and clinical class of obesity categories**

| Study name |        | Normal-weight | Overweight | Obese class I | Obese class II | Obese class III | Height tails                            |                                      | BMI tails                               |                                      | WHR tails                               |                                      |
|------------|--------|---------------|------------|---------------|----------------|-----------------|-----------------------------------------|--------------------------------------|-----------------------------------------|--------------------------------------|-----------------------------------------|--------------------------------------|
|            |        | BMI < 25      | BMI ≥ 25   | BMI ≥ 30      | BMI ≥ 35       | BMI ≥ 40        | 95 <sup>th</sup> -100 <sup>th</sup> pct | 0 <sup>th</sup> -5 <sup>th</sup> pct | 95 <sup>th</sup> -100 <sup>th</sup> pct | 0 <sup>th</sup> -5 <sup>th</sup> pct | 95 <sup>th</sup> -100 <sup>th</sup> pct | 0 <sup>th</sup> -5 <sup>th</sup> pct |
|            |        | N             | N          | N             | N              | N               | N                                       | N                                    | N                                       | N                                    | N                                       | N                                    |
| WGHS       | Men    | -             | -          | -             | -              | -               | -                                       | -                                    | -                                       | -                                    | -                                       | -                                    |
|            | Women  | 11826         | 11062      | 4001          | 1273           | 389             | 1155                                    | 1155                                 | 1145                                    | 1145                                 | 1027                                    | 1027                                 |
|            | Pooled | -             | -          | -             | -              | -               | -                                       | -                                    | -                                       | -                                    | -                                       | -                                    |
| YFS        | Men    | 332           | 576        | 169           | 42             | 9               | 46                                      | 46                                   | 46                                      | 46                                   | 46                                      | 46                                   |
|            | Women  | 605           | 476        | 171           | 50             | 15              | 55                                      | 55                                   | 55                                      | 55                                   | 54                                      | 54                                   |
|            | Pooled | 937           | 1052       | 340           | 92             | 26              | 101                                     | 101                                  | 101                                     | 101                                  | 100                                     | 100                                  |

Supplementary Table 5. Number of individuals in each study for the tails and clinical class of obesity categories

| Study name                 |        | Normal-weight | Overweight | Obese class I | Obese class II | Obese class III | Extreme height                          |                                      | Extreme BMI                             |                                      | Extreme WHR adjusted for BMI            |                                      |
|----------------------------|--------|---------------|------------|---------------|----------------|-----------------|-----------------------------------------|--------------------------------------|-----------------------------------------|--------------------------------------|-----------------------------------------|--------------------------------------|
|                            |        | BMI < 25      | BMI ≥ 25   | BMI ≥ 30      | BMI ≥ 35       | BMI ≥ 40        | 95 <sup>th</sup> -100 <sup>th</sup> pct | 0 <sup>th</sup> -5 <sup>th</sup> pct | 95 <sup>th</sup> -100 <sup>th</sup> pct | 0 <sup>th</sup> -5 <sup>th</sup> pct | 95 <sup>th</sup> -100 <sup>th</sup> pct | 0 <sup>th</sup> -5 <sup>th</sup> pct |
|                            |        | N             | N          | N             | N              | N               | N                                       | N                                    | N                                       | N                                    | N                                       | N                                    |
| <b>Stage 2 - In silico</b> |        |               |            |               |                |                 |                                         |                                      |                                         |                                      |                                         |                                      |
| B58C-REPL                  | Men    | 324           | 906        | 303           | 66             | 19              | 61                                      | 61                                   | 62                                      | 62                                   | 58                                      | 59                                   |
|                            | Women  | 539           | 653        | 266           | 111            | 41              | 60                                      | 59                                   | 60                                      | 59                                   | 58                                      | 58                                   |
|                            | Pooled | 863           | 1559       | 569           | 177            | 60              | 121                                     | 120                                  | 122                                     | 121                                  | 116                                     | 117                                  |
| BHS                        | Men    | 184           | 328        | 87            | 14             | 1               | 26                                      | 26                                   | 26                                      | 26                                   | 25                                      | 25                                   |
|                            | Women  | 373           | 320        | 117           | 29             | 3               | 35                                      | 35                                   | 35                                      | 35                                   | 34                                      | 34                                   |
|                            | Pooled | -             | -          | -             | -              | -               | -                                       | -                                    | -                                       | -                                    | -                                       | -                                    |
| HYPERGENES Controls        | Men    | 405           | 593        | 108           | 10             | 1               | 50                                      | 71                                   | 50                                      | 50                                   | 7                                       | 7                                    |
|                            | Women  | 387           | 297        | 64            | 14             | 2               | 34                                      | 49                                   | 34                                      | 34                                   | 8                                       | 8                                    |
|                            | Pooled | 792           | 890        | 172           | 24             | 3               | 88                                      | 94                                   | 84                                      | 84                                   | 14                                      | 14                                   |
| HYPERGENES Cases           | Men    | 250           | 822        | 203           | 34             | 8               | 54                                      | 62                                   | 54                                      | 54                                   | 8                                       | 8                                    |
|                            | Women  | 218           | 320        | 112           | 37             | 10              | 27                                      | 32                                   | 27                                      | 27                                   | 8                                       | 8                                    |
|                            | Pooled | 468           | 1142       | 315           | 71             | 18              | 81                                      | 88                                   | 81                                      | 81                                   | 16                                      | 16                                   |
| LifeLines                  | Men    | 1202          | 2275       | 539           | 89             | 17              | <b>175</b>                              | <b>173</b>                           | 175                                     | 175                                  | <b>175</b>                              | <b>175</b>                           |
|                            | Women  | 2285          | 2354       | 754           | 231            | 63              | 233                                     | 233                                  | 233                                     | 233                                  | 233                                     | 233                                  |
|                            | Pooled | 3487          | 4629       | 1293          | 320            | 80              | 408                                     | 406                                  | 408                                     | 408                                  | 408                                     | 408                                  |
| PLCO2 controls             | Men    | 200           | 445        | 127           | 26             | 2               | 32                                      | 32                                   | 32                                      | 32                                   | -                                       | -                                    |
|                            | Women  | 254           | 290        | 100           | 38             | 10              | 28                                      | 28                                   | 28                                      | 28                                   | -                                       | -                                    |
|                            | Pooled | 454           | 735        | 227           | 64             | 12              | 60                                      | 60                                   | 60                                      | 60                                   | -                                       | -                                    |
| PLCO2 cases                | Men    | 572           | 1468       | 457           | 102            | 28              | 102                                     | 102                                  | 102                                     | 102                                  | -                                       | -                                    |
|                            | Women  | 410           | 523        | 210           | 57             | 24              | 47                                      | 47                                   | 47                                      | 47                                   | -                                       | -                                    |
|                            | Pooled | 982           | 1991       | 667           | 159            | 52              | 149                                     | 149                                  | 149                                     | 149                                  | -                                       | -                                    |
| PREVEND                    | Men    | 707           | 1163       | 285           | 42             | 6               | 93                                      | 95                                   | 93                                      | 87                                   | 93                                      | 87                                   |
|                            | Women  | 876           | 876        | 293           | 82             | 26              | 87                                      | 88                                   | 94                                      | 88                                   | 94                                      | 88                                   |
|                            | Pooled | 1583          | 2039       | 578           | 124            | 32              | 180                                     | 183                                  | 187                                     | 175                                  | 187                                     | 175                                  |
| QIMR                       | Men    | 748           | 898        | 202           | 32             | 4               | 83                                      | 83                                   | 83                                      | 83                                   | -                                       | -                                    |
|                            | Women  | 1421          | 886        | 314           | 107            | 37              | 117                                     | 117                                  | 116                                     | 116                                  | -                                       | -                                    |
|                            | Pooled | 2169          | 1784       | 516           | 139            | 41              | 200                                     | 200                                  | 199                                     | 199                                  | -                                       | -                                    |
| RS2                        | Men    | 252           | 624        | 125           | 13             | 1               | 44                                      | 44                                   | 44                                      | 44                                   | 44                                      | 44                                   |

**Supplementary Table 5. Number of individuals in each study for the tails and clinical class of obesity categories**

| Study name | Normal-weight | Overweight | Obese class I | Obese class II | Obese class III | Extreme height                          |                                      | Extreme BMI                             |                                      | Extreme WHR adjusted for BMI            |                                      |     |
|------------|---------------|------------|---------------|----------------|-----------------|-----------------------------------------|--------------------------------------|-----------------------------------------|--------------------------------------|-----------------------------------------|--------------------------------------|-----|
|            | BMI < 25      | BMI ≥ 25   | BMI ≥ 30      | BMI ≥ 35       | BMI ≥ 40        | 95 <sup>th</sup> -100 <sup>th</sup> pct | 0 <sup>th</sup> -5 <sup>th</sup> pct | 95 <sup>th</sup> -100 <sup>th</sup> pct | 0 <sup>th</sup> -5 <sup>th</sup> pct | 95 <sup>th</sup> -100 <sup>th</sup> pct | 0 <sup>th</sup> -5 <sup>th</sup> pct |     |
|            | N             | N          | N             | N              | N               | N                                       | N                                    | N                                       | N                                    | N                                       | N                                    |     |
|            | Women         | 327        | 708           | 249            | 75              | 11                                      | 52                                   | 52                                      | 52                                   | 52                                      | 52                                   | 52  |
|            | Pooled        | 579        | 1332          | 374            | 88              | 12                                      | -                                    | -                                       | -                                    | -                                       | -                                    | -   |
| RS3        | Men           | 201        | 676           | 219            | 57              | 11                                      | 44                                   | 44                                      | 44                                   | 44                                      | 43                                   | 43  |
|            | Women         | 384        | 745           | 279            | 93              | 25                                      | 57                                   | 57                                      | 57                                   | 57                                      | 55                                   | 55  |
|            | Pooled        | 585        | 1421          | 498            | 150             | 36                                      | -                                    | -                                       | -                                    | -                                       | -                                    | -   |
| TRAILS     | Men           | 440        | 99            | 32             | 9               | 2                                       | 27                                   | 27                                      | 27                                   | 27                                      | 27                                   | 27  |
|            | Women         | 469        | 133           | 31             | 7               | 5                                       | 31                                   | 31                                      | 31                                   | 31                                      | 31                                   | 31  |
|            | Pooled        | 909        | 232           | 63             | 16              | 7                                       | 58                                   | 58                                      | 58                                   | 58                                      | 58                                   | 58  |
| TWINGENE   | Men           | 1660       | 2750          | 564            | 79              | 18                                      | 225                                  | 225                                     | 220                                  | 221                                     | 219                                  | 218 |
|            | Women         | 2380       | 2506          | 732            | 175             | 34                                      | 251                                  | 251                                     | 245                                  | 245                                     | 244                                  | 244 |
|            | Pooled        | 4040       | 5256          | 1296           | 254             | 52                                      | 475                                  | 476                                     | 464                                  | 464                                     | 463                                  | 462 |

**Supplementary Table 5. Number of individuals in each study for the tails and clinical class of obesity categories**

| Study -name                                    |        | Normal-weight | Overweight | Obese class I | Obese class II | Obese class III | Extreme height                          |                                      | Extreme BMI                             |                                      | Extreme WHR adjusted for BMI            |                                      |
|------------------------------------------------|--------|---------------|------------|---------------|----------------|-----------------|-----------------------------------------|--------------------------------------|-----------------------------------------|--------------------------------------|-----------------------------------------|--------------------------------------|
|                                                |        | BMI < 25      | BMI ≥ 25   | BMI ≥ 30      | BMI ≥ 35       | BMI ≥ 40        | 95 <sup>th</sup> -100 <sup>th</sup> pct | 0 <sup>th</sup> -5 <sup>th</sup> pct | 95 <sup>th</sup> -100 <sup>th</sup> pct | 0 <sup>th</sup> -5 <sup>th</sup> pct | 95 <sup>th</sup> -100 <sup>th</sup> pct | 0 <sup>th</sup> -5 <sup>th</sup> pct |
|                                                |        | N             | N          | N             | N              | N               | N                                       | N                                    | N                                       | N                                    | N                                       | N                                    |
| <b>Stage 2 - Metabochip</b>                    |        |               |            |               |                |                 |                                         |                                      |                                         |                                      |                                         |                                      |
| AMC-PAS                                        | Men    | 112           | 256        | 78            | 12             | 1               | 19                                      | 18                                   | 18                                      | 18                                   | -                                       | -                                    |
|                                                | Women  | 54            | 66         | 25            | 8              | 2               | 6                                       | 6                                    | 6                                       | 6                                    | -                                       | -                                    |
|                                                | Pooled | 166           | 322        | 103           | 20             | 3               | 25                                      | 24                                   | 24                                      | 24                                   | -                                       | -                                    |
| Cardiogenics Controls                          | Men    | 69            | 79         | 20            | 2              | -               | 7                                       | 7                                    | 7                                       | 7                                    | -                                       | -                                    |
|                                                | Women  | 110           | 117        | 29            | 6              | -               | 11                                      | 11                                   | 10                                      | 11                                   | -                                       | -                                    |
|                                                | Pooled | 179           | 196        | 49            | 8              | -               | 18                                      | 18                                   | 17                                      | 18                                   | -                                       | -                                    |
| Cardiogenics Cases                             | Men    | 65            | 262        | 112           | 26             | 3               | 16                                      | 16                                   | 16                                      | 16                                   | -                                       | -                                    |
|                                                | Women  | 19            | 31         | 17            | 6              | 1               | 2                                       | 2                                    | 2                                       | 2                                    | -                                       | -                                    |
|                                                | Pooled | 84            | 293        | 129           | 32             | 4               | 18                                      | 18                                   | 18                                      | 18                                   | -                                       | -                                    |
| D2D2007.DPS.DRSE XTRA.FUSION2.ME TSIM controls | Men    | 1091          | 2300       | 543           | 87             | 15              | 169                                     | 169                                  | 169                                     | 169                                  | 170                                     | 170                                  |
|                                                | Women  | 950           | 1755       | 698           | 201            | 53              | 136                                     | 136                                  | 135                                     | 135                                  | 136                                     | 136                                  |
|                                                | Pooled | 2041          | 4055       | 1241          | 288            | 68              | 305                                     | 305                                  | 304                                     | 304                                  | 306                                     | 306                                  |
| D2D2007.DPS.DRSE XTRA.FUSION2.ME TSIM cases    | Men    | 270           | 1763       | 930           | 281            | 93              | 102                                     | 102                                  | 101                                     | 102                                  | 102                                     | 102                                  |
|                                                | Women  | 71            | 648        | 423           | 187            | 63              | 36                                      | 36                                   | 36                                      | 36                                   | 35                                      | 35                                   |
|                                                | Pooled | 341           | 2411       | 1353          | 468            | 156             | 137                                     | 137                                  | 137                                     | 138                                  | 137                                     | 138                                  |
| DILGOM                                         | Men    | 547           | 1244       | 357           | 83             | 20              | 91                                      | 91                                   | 90                                      | 90                                   | 90                                      | 89                                   |
|                                                | Women  | 908           | 1231       | 499           | 168            | 55              | 108                                     | 108                                  | 108                                     | 106                                  | 106                                     | 107                                  |
|                                                | Pooled | 1455          | 2475       | 856           | 251            | 75              | 199                                     | 199                                  | 198                                     | 196                                  | 196                                     | 196                                  |
| GoDARTS controls                               | Men    | 535           | 1383       | 389           | 75             | 17              | 96                                      | 96                                   | 96                                      | 96                                   | -                                       | -                                    |
|                                                | Women  | 706           | 1082       | 394           | 121            | 36              | 90                                      | 90                                   | 90                                      | 90                                   | -                                       | -                                    |
|                                                | Pooled | 1241          | 2465       | 783           | 196            | 53              | 186                                     | 186                                  | 186                                     | 186                                  | -                                       | -                                    |
| GoDARTS cases                                  | Men    | 193           | 1731       | 1011          | 400            | 140             | 97                                      | 97                                   | 97                                      | 97                                   | -                                       | -                                    |
|                                                | Women  | 144           | 1202       | 846           | 460            | 205             | 68                                      | 68                                   | 68                                      | 68                                   | -                                       | -                                    |
|                                                | Pooled | 337           | 2933       | 1857          | 860            | 345             | 165                                     | 165                                  | 165                                     | 165                                  | -                                       | -                                    |
| EGCUT controls                                 | Men    | 278           | 62         | 0             | 0              | 0               | 19                                      | 17                                   | 17                                      | 18                                   | 17                                      | 17                                   |
|                                                | Women  | 535           | 65         | 2             | 1              | 0               | 31                                      | 36                                   | 30                                      | 30                                   | 30                                      | 30                                   |

**Supplementary Table 5. Number of individuals in each study for the tails and clinical class of obesity categories**

| Study -name          |        | Normal-weight | Overweight | Obese class I | Obese class II | Obese class III | Extreme height                          |                                      | Extreme BMI                             |                                      | Extreme WHR adjusted for BMI            |                                      |
|----------------------|--------|---------------|------------|---------------|----------------|-----------------|-----------------------------------------|--------------------------------------|-----------------------------------------|--------------------------------------|-----------------------------------------|--------------------------------------|
|                      |        | BMI < 25      | BMI ≥ 25   | BMI ≥ 30      | BMI ≥ 35       | BMI ≥ 40        | 95 <sup>th</sup> -100 <sup>th</sup> pct | 0 <sup>th</sup> -5 <sup>th</sup> pct | 95 <sup>th</sup> -100 <sup>th</sup> pct | 0 <sup>th</sup> -5 <sup>th</sup> pct | 95 <sup>th</sup> -100 <sup>th</sup> pct | 0 <sup>th</sup> -5 <sup>th</sup> pct |
|                      |        | N             | N          | N             | N              | N               | N                                       | N                                    | N                                       | N                                    | N                                       | N                                    |
|                      | Pooled | 813           | 127        | 2             | 1              | 0               | 50                                      | 53                                   | 47                                      | 48                                   | 47                                      | 47                                   |
| EGCUT CAD            | Men    | 93            | 253        | 114           | 25             | 5               | 19                                      | 18                                   | 18                                      | 18                                   | 18                                      | 18                                   |
|                      | Women  | 77            | 277        | 145           | 54             | 16              | 22                                      | 20                                   | 18                                      | 18                                   | 18                                      | 18                                   |
|                      | Pooled | 170           | 530        | 259           | 79             | 21              | 41                                      | 38                                   | 36                                      | 36                                   | 36                                      | 36                                   |
| EGCUT T2D            | Men    | 11            | 343        | 253           | 96             | 24              | 20                                      | 19                                   | 18                                      | 18                                   | 14                                      | 14                                   |
|                      | Women  | 22            | 591        | 450           | 217            | 79              | 39                                      | 38                                   | 31                                      | 31                                   | 21                                      | 21                                   |
|                      | Pooled | 33            | 934        | 703           | 313            | 103             | 59                                      | 57                                   | 49                                      | 49                                   | 35                                      | 35                                   |
| Ely                  | Men    | 210           | 534        | 162           | 31             | 7               | 38                                      | 38                                   | 38                                      | 38                                   | 37                                      | 37                                   |
|                      | Women  | 330           | 525        | 202           | 71             | 24              | 43                                      | 43                                   | 43                                      | 43                                   | 43                                      | 43                                   |
|                      | Pooled | 540           | 1059       | 364           | 102            | 31              | 81                                      | 81                                   | 81                                      | 81                                   | 80                                      | 80                                   |
| EPIC_CONTROLS        | Men    | 148           | 262        | 56            | 5              | 1               | 21                                      | 21                                   | 21                                      | 21                                   | 21                                      | 21                                   |
|                      | Women  | 254           | 297        | 82            | 14             | 3               | 28                                      | 28                                   | 28                                      | 28                                   | 28                                      | 28                                   |
|                      | Pooled | 402           | 559        | 138           | 19             | 4               | 49                                      | 49                                   | 49                                      | 49                                   | 49                                      | 49                                   |
| EPIC_CASES           | Men    | 40            | 392        | 142           | 26             | 7               | 22                                      | 22                                   | 22                                      | 22                                   | 22                                      | 22                                   |
|                      | Women  | 45            | 246        | 136           | 45             | 14              | 15                                      | 15                                   | 15                                      | 15                                   | 15                                      | 15                                   |
|                      | Pooled | 85            | 638        | 278           | 71             | 21              | 37                                      | 37                                   | 37                                      | 37                                   | 37                                      | 37                                   |
| Fenland              | Men    | 494           | 992        | 297           | 66             | 12              | 75                                      | 75                                   | 75                                      | 75                                   | 75                                      | 75                                   |
|                      | Women  | 806           | 892        | 350           | 137            | 39              | 85                                      | 85                                   | 85                                      | 85                                   | 85                                      | 85                                   |
|                      | Pooled | 1300          | 1884       | 647           | 203            | 51              | 160                                     | 160                                  | 160                                     | 160                                  | 160                                     | 160                                  |
| GLACIER              | Men    | 943           | 1434       | 269           | 31             | 9               | 119                                     | 119                                  | 120                                     | 120                                  | -                                       | -                                    |
|                      | Women  | 1898          | 1754       | 521           | 121            | 27              | 183                                     | 183                                  | 184                                     | 183                                  | -                                       | -                                    |
|                      | Pooled | 2841          | 3188       | 790           | 152            | 36              | 302                                     | 302                                  | 304                                     | 303                                  | -                                       | -                                    |
| HNR                  | Men    | 438           | 1823       | 596           | 125            | 127             | 107                                     | 114                                  | 113                                     | 114                                  | 115                                     | 119                                  |
|                      | Women  | 772           | 1473       | 637           | 192            | 56              | 109                                     | 146                                  | 113                                     | 114                                  | 117                                     | 110                                  |
|                      | Pooled | 1210          | 3296       | 1233          | 317            | 183             | 216                                     | 260                                  | 226                                     | 228                                  | 232                                     | 229                                  |
| HUNT.TROMSO controls | Men    | 237           | 422        | 72            | 9              | -               | 34                                      | 33                                   | 33                                      | 33                                   | 25                                      | 25                                   |
|                      | Women  | 226           | 389        | 151           | 23             | 3               | 31                                      | 32                                   | 31                                      | 31                                   | 24                                      | 23                                   |
|                      | Pooled | 463           | 811        | 223           | 32             | 3               | 65                                      | 64                                   | 64                                      | 64                                   | 50                                      | 50                                   |
| HUNT.TROMSO cases    | Men    | 103           | 443        | 180           | 29             | 4               | 27                                      | 28                                   | 27                                      | 28                                   | 21                                      | 21                                   |



**Supplementary Table 5. Number of individuals in each study for the tails and clinical class of obesity categories**

| Study -name      |        | Normal-weight | Overweight | Obese class I | Obese class II | Obese class III | Extreme height                          |                                      | Extreme BMI                             |                                      | Extreme WHR adjusted for BMI            |                                      |
|------------------|--------|---------------|------------|---------------|----------------|-----------------|-----------------------------------------|--------------------------------------|-----------------------------------------|--------------------------------------|-----------------------------------------|--------------------------------------|
|                  |        | BMI < 25      | BMI ≥ 25   | BMI ≥ 30      | BMI ≥ 35       | BMI ≥ 40        | 95 <sup>th</sup> -100 <sup>th</sup> pct | 0 <sup>th</sup> -5 <sup>th</sup> pct | 95 <sup>th</sup> -100 <sup>th</sup> pct | 0 <sup>th</sup> -5 <sup>th</sup> pct | 95 <sup>th</sup> -100 <sup>th</sup> pct | 0 <sup>th</sup> -5 <sup>th</sup> pct |
|                  |        | N             | N          | N             | N              | N               | N                                       | N                                    | N                                       | N                                    | N                                       | N                                    |
|                  | Women  | 95            | 427        | 258           | 85             | 29              | 27                                      | 27                                   | 26                                      | 27                                   | 20                                      | 19                                   |
|                  | Pooled | 198           | 870        | 438           | 114            | 33              | 54                                      | 53                                   | 54                                      | 54                                   | 41                                      | 40                                   |
| IMPROVE          | Men    | 425           | 1240       | 333           | 60             | 11              | 84                                      | 84                                   | 84                                      | 84                                   | 74                                      | 86                                   |
|                  | Women  | 647           | 1129       | 422           | 120            | 35              | 90                                      | 88                                   | 89                                      | 89                                   | 89                                      | 102                                  |
|                  | Pooled | 1072          | 2369       | 755           | 180            | 46              | 174                                     | 172                                  | 173                                     | 173                                  | 163                                     | 188                                  |
| KORA S3 METABO   | Men    | 207           | 392        | 87            | 9              | 2               | 31                                      | 31                                   | 30                                      | 30                                   | 30                                      | 30                                   |
|                  | Women  | 387           | 272        | 99            | 30             | 9               | 35                                      | 34                                   | 33                                      | 33                                   | 33                                      | 33                                   |
|                  | Pooled | 594           | 664        | 186           | 39             | 11              | 66                                      | 65                                   | 63                                      | 63                                   | 63                                      | 63                                   |
| KORA S4 METABO   | Men    | 197           | 385        | 90            | 13             | 2               | 30                                      | 30                                   | 30                                      | 30                                   | 30                                      | 30                                   |
|                  | Women  | 294           | 330        | 107           | 41             | 7               | 32                                      | 32                                   | 32                                      | 32                                   | 32                                      | 32                                   |
|                  | Pooled | 491           | 715        | 197           | 54             | 9               | 62                                      | 62                                   | 62                                      | 62                                   | 62                                      | 62                                   |
| LURIC            | Men    | 544           | 1464       | 426           | 64             | 13              | 101                                     | 101                                  | 101                                     | 98                                   | 98                                      | 98                                   |
|                  | Women  | 292           | 596        | 224           | 49             | 14              | 44                                      | 44                                   | 44                                      | 44                                   | 44                                      | 44                                   |
|                  | Pooled | 836           | 2060       | 650           | 113            | 27              | 145                                     | 145                                  | 145                                     | 142                                  | 142                                     | 142                                  |
| MORGAM controls  | Men    | 719           | 1376       | 361           | 70             | 14              | 106                                     | 106                                  | 106                                     | 102                                  | 53                                      | 55                                   |
|                  | Women  | 108           | 211        | 95            | 25             | 7               | 17                                      | 17                                   | 17                                      | 17                                   | 14                                      | 15                                   |
|                  | Pooled | 827           | 1587       | 456           | 95             | 21              | 123                                     | 123                                  | 123                                     | 119                                  | 67                                      | 70                                   |
| MORGAM cases     | Men    | 430           | 1277       | 393           | 65             | 12              | 86                                      | 84                                   | 87                                      | 86                                   | 49                                      | 49                                   |
|                  | Women  | 64            | 182        | 99            | 41             | 8               | 13                                      | 13                                   | 13                                      | 13                                   | 12                                      | 12                                   |
|                  | Pooled | 494           | 1459       | 492           | 106            | 20              | 99                                      | 97                                   | 100                                     | 99                                   | 61                                      | 61                                   |
| NSHD             | Men    | 131           | 333        | 117           | 23             | 5               | 24                                      | 24                                   | 24                                      | 24                                   | 24                                      | 24                                   |
|                  | Women  | 184           | 331        | 144           | 50             | 16              | 26                                      | 26                                   | 26                                      | 26                                   | 26                                      | 26                                   |
|                  | Pooled | 315           | 664        | 261           | 73             | 21              | 50                                      | 50                                   | 50                                      | 50                                   | 50                                      | 50                                   |
| PIVUS            | Men    | 145           | 344        | 93            | 14             | 1               | 25                                      | 25                                   | 25                                      | 25                                   | 25                                      | 24                                   |
|                  | Women  | 169           | 315        | 127           | 30             | 8               | 24                                      | 24                                   | 25                                      | 25                                   | 24                                      | 25                                   |
|                  | Pooled | 314           | 659        | 220           | 44             | 9               | 49                                      | 49                                   | 50                                      | 50                                   | 49                                      | 49                                   |
| STR              | Men    | 394           | 354        | 62            | 3              | -               | 36                                      | 36                                   | 38                                      | 38                                   | 15                                      | 15                                   |
|                  | Women  | 643           | 570        | 143           | 35             | 4               | 63                                      | 63                                   | 63                                      | 63                                   | 34                                      | 35                                   |
|                  | Pooled | 1037          | 924        | 205           | 38             | 4               | 99                                      | 99                                   | 101                                     | 101                                  | 49                                      | 50                                   |
| THISEAS Controls | Men    | 77            | 337        | 149           | 37             | 5               | 21                                      | 20                                   | 19                                      | 20                                   | 17                                      | 16                                   |

**Supplementary Table 5. Number of individuals in each study for the tails and clinical class of obesity categories**

| Study -name       |        | Normal-weight | Overweight | Obese class I | Obese class II | Obese class III | Extreme height                          |                                      | Extreme BMI                             |                                      | Extreme WHR adjusted for BMI            |                                      |
|-------------------|--------|---------------|------------|---------------|----------------|-----------------|-----------------------------------------|--------------------------------------|-----------------------------------------|--------------------------------------|-----------------------------------------|--------------------------------------|
|                   |        | BMI < 25      | BMI ≥ 25   | BMI ≥ 30      | BMI ≥ 35       | BMI ≥ 40        | 95 <sup>th</sup> -100 <sup>th</sup> pct | 0 <sup>th</sup> -5 <sup>th</sup> pct | 95 <sup>th</sup> -100 <sup>th</sup> pct | 0 <sup>th</sup> -5 <sup>th</sup> pct | 95 <sup>th</sup> -100 <sup>th</sup> pct | 0 <sup>th</sup> -5 <sup>th</sup> pct |
|                   |        | N             | N          | N             | N              | N               | N                                       | N                                    | N                                       | N                                    | N                                       | N                                    |
|                   | Women  | 142           | 386        | 195           | 58             | 17              | 26                                      | 27                                   | 27                                      | 27                                   | 18                                      | 17                                   |
|                   | Pooled | 219           | 723        | 344           | 95             | 22              | 47                                      | 47                                   | 46                                      | 47                                   | 35                                      | 33                                   |
| THISEAS Cases     | Men    | 88            | 304        | 97            | 22             | 3               | 19                                      | 20                                   | 18                                      | 18                                   | 9                                       | 9                                    |
|                   | Women  | 19            | 55         | 19            | 6              | -               | 3                                       | 3                                    | 3                                       | 3                                    | 2                                       | 1                                    |
|                   | Pooled | 107           | 359        | 116           | 28             | 3               | 22                                      | 23                                   | 21                                      | 21                                   | 11                                      | 10                                   |
| ULSAM             | Men    | 409           | 701        | 139           | 17             | 4               | 56                                      | 55                                   | 56                                      | 56                                   | 55                                      | 54                                   |
|                   | Women  | -             | -          | -             | -              | -               | -                                       | -                                    | -                                       | -                                    | -                                       | -                                    |
|                   | Pooled | 409           | 701        | 139           | 17             | 4               | 56                                      | 55                                   | 56                                      | 56                                   | 55                                      | 54                                   |
| Whitehall         | Men    | 573           | 1126       | 276           | 42             | 5               | 85                                      | 85                                   | 85                                      | 85                                   | 85                                      | 85                                   |
|                   | Women  | 198           | 337        | 127           | 46             | 18              | 27                                      | 27                                   | 27                                      | 27                                   | 27                                      | 27                                   |
|                   | Pooled | 771           | 1463       | 403           | 88             | 23              | 112                                     | 112                                  | 112                                     | 112                                  | 112                                     | 112                                  |
| WTCCC T2D nonGWAS | Men    | 62            | 562        | 336           | 136            | 42              | 26                                      | 24                                   | 32                                      | 32                                   | 28                                      | 22                                   |
|                   | Women  | 41            | 402        | 286           | 163            | 93              | 20                                      | 21                                   | 21                                      | 21                                   | 19                                      | 25                                   |
|                   | Pooled | 103           | 964        | 622           | 299            | 135             | 46                                      | 45                                   | 53                                      | 53                                   | 47                                      | 47                                   |

**Supplementary Table 5. Number of individuals in each study for the tails and clinical class of obesity categories**

| Study name and case/control description                  |        | Controls<br>N | Cases | Case/control definition                                                                                                                                                                                                           |
|----------------------------------------------------------|--------|---------------|-------|-----------------------------------------------------------------------------------------------------------------------------------------------------------------------------------------------------------------------------------|
| <b>N Ancillary</b>                                       |        |               |       |                                                                                                                                                                                                                                   |
| Essen Obesity Study (Essen Case-Control GWAS)            | Men    | 171           | 192   | Cases: early onset obese children and adolescent recruited in a specialized hospital; controls: healthy lean individuals                                                                                                          |
|                                                          | Women  | 264           | 261   |                                                                                                                                                                                                                                   |
|                                                          | Pooled | 435           | 453   |                                                                                                                                                                                                                                   |
| Essen Obesity Study (Essen Obesity Trio GWAS), Parents   | Men    | 96            | 326   | Biological parents of the offspring. Family-based association analysis has been used for this study                                                                                                                               |
|                                                          | Women  | 182           | 310   |                                                                                                                                                                                                                                   |
|                                                          | Pooled | 278           | 636   |                                                                                                                                                                                                                                   |
| Essen Obesity Study (Essen Obesity Trio GWAS), Offspring | Men    | 0             | 318   | Obese children and adolescent ( $\geq 90$ th percentile, most $\geq 97$ th percentile) recruited in a specialized hospital. Family-based association analysis has been used for this study                                        |
|                                                          | Women  | 0             | 387   |                                                                                                                                                                                                                                   |
|                                                          | Pooled | 0             | 705   |                                                                                                                                                                                                                                   |
| French Extreme Obesity                                   | Men    | 485           | 435   | Cases: early onset (< 6 yo) obese children and class III obese adults recruited in a specialized hospital; controls: lean adults and children                                                                                     |
|                                                          | Women  | 854           | 878   |                                                                                                                                                                                                                                   |
|                                                          | Pooled | 1339          | 1313  |                                                                                                                                                                                                                                   |
| GEO-IT                                                   | Men    | 680           | 581   | Cases: Class III obese adults recruited in a specialized hospital. Controls: lean adults                                                                                                                                          |
|                                                          | Women  | 1112          | 1136  |                                                                                                                                                                                                                                   |
|                                                          | Pooled | 1792          | 1717  |                                                                                                                                                                                                                                   |
| GOYA                                                     | Men    | 792           | 673   | Cases: women with the 3.6% largest residuals after regressing BMI on age and parity. Men with BMI $\geq 31$ kg/m <sup>2</sup> , corresponding to >99th percentile. Controls: randomly selected subjects from the same populations |
|                                                          | Women  | 1948          | 1960  |                                                                                                                                                                                                                                   |
|                                                          | Pooled | 2740          | 2633  |                                                                                                                                                                                                                                   |

Supplementary Table 6. Results for all SNPs taken forward for replication that reached genome-wide significance ( $P < 5 \times 10^{-8}$ )

| SNP                           | Chr | Position  | Gene               | Effect allele | Other allele | Effect allele freq | Stage 1   |              |      |          | Stage 2   |              |      |          | Stage 1 + Stage 2 |              |      |          | Trait           |
|-------------------------------|-----|-----------|--------------------|---------------|--------------|--------------------|-----------|--------------|------|----------|-----------|--------------|------|----------|-------------------|--------------|------|----------|-----------------|
|                               |     |           |                    |               |              |                    | No. cases | No. controls | OR   | P        | No. cases | No. controls | OR   | P        | No. cases         | No. controls | OR   | P        |                 |
| <b>Novel loci<sup>a</sup></b> |     |           |                    |               |              |                    |           |              |      |          |           |              |      |          |                   |              |      |          |                 |
| rs584438                      | 17  | 35852698  | <i>IGFBP4</i>      | c             | a            | 0.62               | 7830      | 7850         | 1.18 | 1.11E-09 | 1814      | 1814         | 1.19 | 1.20E-03 | 9644              | 9664         | 1.18 | 5.22E-12 | Height tails    |
| rs6662509                     | 1   | 9240191   | <i>H6PD</i>        | t             | c            | 0.15               | 5462      | 5461         | 1.23 | 2.21E-06 | 3615      | 3566         | 1.23 | 3.37E-05 | 9077              | 9027         | 1.23 | 3.19E-10 | Height tails    |
| rs2362965                     | 3   | 159592073 | <i>RSRC1/SHOX2</i> | t             | a            | 0.50               | 7989      | 7993         | 1.14 | 1.45E-07 | 4819      | 4775         | 1.10 | 2.46E-03 | 12808             | 12768        | 1.12 | 2.14E-09 | Height tails    |
| rs1594829                     | 8   | 26261994  | <i>PPP2R2A</i>     | c             | t            | 0.77               | 6693      | 6697         | 1.18 | 5.51E-07 | 4166      | 4115         | 1.11 | 1.08E-02 | 10859             | 10812        | 1.15 | 3.88E-08 | Height tails    |
| rs7989336                     | 13  | 95815549  | <i>HS6ST3</i>      | a             | g            | 0.47               | 9825      | 62114        | 1.12 | 5.88E-09 | 1664      | 17113        | 1.04 | 2.49E-01 | 11489             | 79226        | 1.10 | 1.06E-08 | Obesity class 2 |
| rs17381664                    | 1   | 77820919  | <i>ZZZ3</i>        | c             | t            | 0.39               | 9833      | 62114        | 1.11 | 7.61E-08 | 5351      | 33841        | 1.05 | 3.60E-02 | 15184             | 95955        | 1.09 | 2.85E-08 | Obesity class 2 |
| rs17024258                    | 1   | 109948844 | <i>GNAT2</i>       | t             | c            | 0.04               | 18662     | 38427        | 1.23 | 1.41E-06 | 8956      | 15471        | 1.28 | 1.12E-06 | 27618             | 53898        | 1.25 | 8.66E-12 | Obesity class 1 |
| rs4735692                     | 8   | 76778218  | <i>HNFB4G</i>      | a             | g            | 0.58               | 32675     | 65697        | 1.07 | 5.03E-08 | 22086     | 38352        | 1.04 | 4.51E-03 | 54761             | 104049       | 1.06 | 2.48E-09 | Obesity class 1 |
| rs13041126                    | 20  | 50526403  | <i>MRPS33P4</i>    | t             | c            | 0.72               | 32020     | 64015        | 1.07 | 3.05E-07 | 22088     | 37595        | 1.04 | 7.03E-03 | 54108             | 101610       | 1.06 | 2.16E-08 | Obesity class 1 |
| rs2531995                     | 16  | 3953468   | <i>ADCY9</i>       | t             | c            | 0.61               | 32433     | 65542        | 1.06 | 3.17E-06 | 6680      | 16602        | 1.07 | 3.94E-03 | 39113             | 82144        | 1.07 | 4.04E-08 | Obesity class 1 |
| rs4735692                     | 8   | 76778218  | <i>HNFB4G</i>      | a             | g            | 0.58               | 92703     | 65698        | 1.05 | 6.13E-09 | 65323     | 39290        | 1.03 | 3.01E-03 | 158026            | 104988       | 1.04 | 3.51E-10 | Overweight      |
| rs7503807                     | 17  | 76205706  | <i>RPTOR</i>       | a             | c            | 0.57               | 92855     | 65723        | 1.04 | 4.20E-06 | 64535     | 38813        | 1.03 | 9.20E-04 | 157390            | 104536       | 1.04 | 1.98E-08 | Overweight      |
| <b>Known loci</b>             |     |           |                    |               |              |                    |           |              |      |          |           |              |      |          |                   |              |      |          |                 |
| rs11075990                    | 16  | 52377394  | <i>FTO</i>         | g             | a            | 0.40               | 7744      | 7893         | 1.36 | 9.28E-33 | 4209      | 4204         | 1.35 | 2.39E-20 | 11953             | 12097        | 1.35 | 1.63E-51 | BMI tails       |
| rs8089364                     | 18  | 56009809  | <i>MC4R</i>        | c             | t            | 0.27               | 6802      | 6933         | 1.22 | 9.07E-11 | 4518      | 4503         | 1.27 | 5.59E-12 | 11320             | 11436        | 1.24 | 4.42E-21 | BMI tails       |
| rs2903492                     | 2   | 614678    | <i>TMEM18</i>      | a             | g            | 0.83               | 5893      | 6024         | 1.29 | 3.89E-11 | 3756      | 3745         | 1.21 | 1.67E-05 | 9649              | 9769         | 1.26 | 5.77E-15 | BMI tails       |
| rs2568958                     | 1   | 72537704  | <i>NEGR1</i>       | a             | g            | 0.60               | 7766      | 7915         | 1.18 | 6.84E-10 | 4900      | 4891         | 1.15 | 5.56E-06 | 12666             | 12806        | 1.16 | 2.26E-14 | BMI tails       |
| rs10938397                    | 4   | 44877284  | <i>GNPDA2</i>      | g             | a            | 0.43               | 7873      | 8017         | 1.15 | 1.54E-07 | 4862      | 4847         | 1.17 | 2.22E-07 | 12735             | 12865        | 1.16 | 1.76E-13 | BMI tails       |
| rs633715                      | 1   | 176119203 | <i>SEC16B</i>      | c             | t            | 0.19               | 6167      | 6296         | 1.24 | 3.37E-09 | 3604      | 3590         | 1.17 | 2.15E-04 | 9771              | 9886         | 1.21 | 4.90E-12 | BMI tails       |
| rs987237                      | 6   | 50911009  | <i>TFAP2B</i>      | g             | a            | 0.18               | 6160      | 6300         | 1.20 | 4.34E-07 | 3877      | 3874         | 1.21 | 1.25E-05 | 10037             | 10174        | 1.20 | 2.49E-11 | BMI tails       |
| rs2030323                     | 11  | 27685115  | <i>BDNF</i>        | c             | a            | 0.79               | 6248      | 6384         | 1.21 | 5.20E-08 | 4318      | 4304         | 1.13 | 1.23E-03 | 10566             | 10688        | 1.18 | 5.58E-10 | BMI tails       |
| rs7138803                     | 12  | 48533735  | <i>LOC144233</i>   | a             | g            | 0.38               | 7668      | 7810         | 1.14 | 5.83E-07 | 4718      | 4714         | 1.11 | 8.49E-04 | 12386             | 12524        | 1.13 | 2.37E-09 | BMI tails       |
| rs1516725                     | 3   | 187306698 | <i>ETV5</i>        | c             | t            | 0.86               | 5175      | 5327         | 1.30 | 2.06E-08 | 3265      | 3253         | 1.11 | 5.85E-02 | 8440              | 8580         | 1.21 | 3.65E-08 | BMI tails       |
| rs1991431                     | 3   | 142616140 | <i>ZBTB38</i>      | a             | g            | 0.44               | 8013      | 8031         | 1.33 | 4.33E-29 | 4869      | 4828         | 1.32 | 1.03E-19 | 12882             | 12859        | 1.33 | 3.93E-47 | Height tails    |
| rs224333                      | 20  | 33487376  | <i>GDF5</i>        | a             | g            | 0.36               | 7682      | 7697         | 1.33 | 7.50E-25 | 4664      | 4612         | 1.28 | 8.49E-14 | 12346             | 12309        | 1.31 | 8.17E-37 | Height tails    |
| rs1351394                     | 12  | 64638093  | <i>HMGA2</i>       | t             | c            | 0.49               | 7950      | 7960         | 1.28 | 5.95E-22 | 4872      | 4831         | 1.23 | 9.76E-12 | 12822             | 12791        | 1.26 | 6.59E-32 | Height tails    |
| rs42235                       | 7   | 92086012  | <i>CDK6</i>        | t             | c            | 0.30               | 7528      | 7541         | 1.31 | 9.37E-21 | 4672      | 4621         | 1.24 | 8.71E-10 | 12200             | 12162        | 1.28 | 1.36E-28 | Height tails    |
| rs806794                      | 6   | 26308656  | <i>HIST1H2BF</i>   | a             | g            | 0.70               | 7328      | 7347         | 1.25 | 6.10E-14 | 4701      | 4662         | 1.28 | 2.63E-13 | 12029             | 12009        | 1.26 | 1.31E-25 | Height tails    |
| rs3118906                     | 13  | 50004789  | <i>DLEU7</i>       | g             | a            | 0.72               | 7538      | 7560         | 1.29 | 6.26E-18 | 4539      | 4487         | 1.22 | 2.01E-08 | 12077             | 12047        | 1.26 | 1.51E-24 | Height tails    |
| rs11205303                    | 1   | 148173037 | <i>MTMR11</i>      | c             | t            | 0.38               | 7597      | 7612         | 1.26 | 3.81E-15 | 4656      | 4601         | 1.23 | 1.32E-09 | 12253             | 12213        | 1.25 | 3.72E-23 | Height tails    |

Supplementary Table 6. Results for all SNPs taken forward for replication that reached genome-wide significance ( $P < 5 \times 10^{-8}$ )

| SNP        | Chr | Position  | Gene               | Effect allele | Other allele | Effect allele freq | Stage 1   |              |      |          | Stage 2   |              |      |          | Stage 1 + Stage 2 |              |      |          | Trait        |
|------------|-----|-----------|--------------------|---------------|--------------|--------------------|-----------|--------------|------|----------|-----------|--------------|------|----------|-------------------|--------------|------|----------|--------------|
|            |     |           |                    |               |              |                    | No. cases | No. controls | OR   | P        | No. cases | No. controls | OR   | P        | No. cases         | No. controls | OR   | P        |              |
| rs798554   | 7   | 2726321   | AMZ1               | c             | t            | 0.68               | 7531      | 7552         | 1.27 | 3.58E-17 | 4810      | 4769         | 1.20 | 6.35E-08 | 12341             | 12321        | 1.24 | 4.36E-23 | Height tails |
| rs6845078  | 4   | 17561306  | LCORL              | c             | t            | 0.85               | 5627      | 5628         | 1.34 | 4.90E-12 | 3483      | 3435         | 1.45 | 5.40E-12 | 9110              | 9063         | 1.38 | 3.16E-22 | Height tails |
| rs7689420  | 4   | 145787802 | HHIP               | c             | t            | 0.84               | 5842      | 5836         | 1.26 | 7.17E-09 | 3866      | 3815         | 1.44 | 1.16E-14 | 9708              | 9651         | 1.33 | 4.02E-21 | Height tails |
| rs7741741  | 6   | 142697494 | GPR126             | t             | a            | 0.72               | 7346      | 7370         | 1.22 | 1.28E-10 | 4640      | 4587         | 1.28 | 7.28E-12 | 11986             | 11957        | 1.24 | 1.04E-20 | Height tails |
| rs17720281 | 4   | 145763226 | HHIP               | t             | c            | 0.41               | 7875      | 7897         | 1.22 | 5.03E-13 | 4872      | 4831         | 1.19 | 1.39E-08 | 12747             | 12728        | 1.21 | 4.91E-20 | Height tails |
| rs11259933 | 15  | 82371160  | ADAMTSL3           | a             | g            | 0.51               | 8011      | 8017         | 1.17 | 9.48E-11 | 4821      | 4779         | 1.22 | 1.56E-10 | 12832             | 12796        | 1.19 | 1.39E-19 | Height tails |
| rs2079795  | 17  | 56851431  | C17orf82           | t             | c            | 0.32               | 7561      | 7585         | 1.18 | 1.44E-09 | 4838      | 4796         | 1.24 | 6.06E-11 | 12399             | 12381        | 1.20 | 1.08E-18 | Height tails |
| rs1878528  | 4   | 82403258  | PRKG2              | g             | a            | 0.33               | 7848      | 7861         | 1.19 | 7.75E-11 | 4808      | 4768         | 1.21 | 8.83E-09 | 12656             | 12629        | 1.20 | 4.21E-18 | Height tails |
| rs2145270  | 20  | 6569685   | BMP2               | c             | t            | 0.37               | 7516      | 7533         | 1.21 | 1.53E-11 | 4669      | 4618         | 1.20 | 5.86E-08 | 12185             | 12151        | 1.20 | 5.18E-18 | Height tails |
| rs1885486  | 6   | 7640972   | BMP6               | a             | g            | 0.48               | 8001      | 8007         | 1.18 | 1.08E-10 | 4904      | 4863         | 1.18 | 8.82E-08 | 12905             | 12870        | 1.18 | 5.01E-17 | Height tails |
| rs1490384  | 6   | 126892853 | C6orf173           | t             | c            | 0.49               | 7961      | 7971         | 1.19 | 8.16E-12 | 4872      | 4829         | 1.16 | 2.36E-06 | 12833             | 12800        | 1.18 | 1.20E-16 | Height tails |
| rs9292468  | 5   | 32854830  | C5orf23            | t             | c            | 0.40               | 7863      | 7881         | 1.18 | 1.80E-10 | 4903      | 4862         | 1.17 | 2.34E-07 | 12766             | 12743        | 1.18 | 2.11E-16 | Height tails |
| rs7534091  | 1   | 118666139 | SPAG17             | a             | g            | 0.74               | 6951      | 6935         | 1.20 | 7.06E-09 | 4409      | 4356         | 1.24 | 4.78E-09 | 11360             | 11291        | 1.22 | 2.47E-16 | Height tails |
| rs11144688 | 9   | 77732106  | PCSK5              | g             | a            | 0.89               | 4876      | 4884         | 1.46 | 7.03E-08 | 2360      | 2307         | 1.49 | 1.14E-09 | 7236              | 7191         | 1.48 | 4.27E-16 | Height tails |
| rs4535251  | 3   | 173409067 | FND3B              | t             | c            | 0.50               | 8011      | 8019         | 1.16 | 1.10E-08 | 4904      | 4863         | 1.20 | 5.34E-09 | 12915             | 12882        | 1.18 | 4.39E-16 | Height tails |
| rs3791679  | 2   | 55950396  | EFEMP1             | a             | g            | 0.77               | 6896      | 6882         | 1.22 | 8.19E-10 | 4525      | 4485         | 1.21 | 1.92E-07 | 11421             | 11367        | 1.22 | 7.81E-16 | Height tails |
| rs8114671  | 20  | 33252803  | PROCR              | c             | a            | 0.56               | 7671      | 7693         | 1.17 | 7.88E-10 | 4836      | 4794         | 1.17 | 2.75E-07 | 12507             | 12487        | 1.17 | 1.09E-15 | Height tails |
| rs2280470  | 15  | 87196630  | ACAN               | a             | g            | 0.33               | 7753      | 7773         | 1.18 | 3.01E-09 | 4865      | 4829         | 1.19 | 8.64E-08 | 12618             | 12602        | 1.18 | 1.45E-15 | Height tails |
| rs11082304 | 18  | 18974971  | CABLES1            | t             | g            | 0.50               | 8022      | 8025         | 1.15 | 1.31E-07 | 4327      | 4276         | 1.21 | 3.33E-09 | 12349             | 12301        | 1.18 | 4.75E-15 | Height tails |
| rs1759645  | 6   | 34302844  | HMGA1              | c             | t            | 0.16               | 5734      | 5719         | 1.27 | 5.25E-09 | 3610      | 3560         | 1.31 | 1.77E-07 | 9344              | 9279         | 1.29 | 5.23E-15 | Height tails |
| rs2284746  | 1   | 17179262  | MFAP2              | g             | c            | 0.52               | 7972      | 7980         | 1.16 | 1.03E-08 | 4732      | 4677         | 1.18 | 9.15E-08 | 12704             | 12657        | 1.17 | 5.37E-15 | Height tails |
| rs10748128 | 12  | 68113925  | FRS2               | t             | g            | 0.35               | 7564      | 7592         | 1.18 | 1.17E-08 | 4703      | 4650         | 1.20 | 1.06E-07 | 12267             | 12242        | 1.19 | 6.61E-15 | Height tails |
| rs1074683  | 20  | 31768314  | PXMP4              | c             | g            | 0.76               | 6819      | 6808         | 1.23 | 2.94E-10 | 4414      | 4371         | 1.18 | 8.21E-06 | 11233             | 11179        | 1.21 | 1.46E-14 | Height tails |
| rs2941551  | 17  | 59332280  | CSH1               | g             | a            | 0.27               | 7427      | 7425         | 1.21 | 1.85E-10 | 4634      | 4582         | 1.16 | 2.57E-05 | 12061             | 12008        | 1.19 | 3.16E-14 | Height tails |
| rs1029534  | 7   | 28155608  | JAZF1              | t             | g            | 0.31               | 7575      | 7595         | 1.17 | 2.54E-08 | 4417      | 4381         | 1.19 | 5.95E-07 | 11992             | 11976        | 1.18 | 8.19E-14 | Height tails |
| rs3764419  | 17  | 26188149  | ATAD5              | c             | a            | 0.61               | 7865      | 7881         | 1.16 | 1.51E-08 | 4840      | 4798         | 1.16 | 1.18E-06 | 12705             | 12679        | 1.16 | 8.95E-14 | Height tails |
| rs11895026 | 2   | 24890362  | CENPO, ADCY3, POMC | a             | c            | 0.24               | 6933      | 6918         | 1.19 | 4.82E-08 | 4542      | 4500         | 1.20 | 5.68E-07 | 11475             | 11418        | 1.19 | 1.41E-13 | Height tails |
| rs3814333  | 1   | 182273742 | GLT25D2            | t             | c            | 0.33               | 7643      | 7639         | 1.17 | 5.88E-09 | 4607      | 4555         | 1.16 | 8.66E-06 | 12250             | 12194        | 1.17 | 2.34E-13 | Height tails |
| rs9832740  | 3   | 72475831  | RYBP               | g             | c            | 0.49               | 7989      | 7992         | 1.15 | 2.50E-08 | 4734      | 4681         | 1.16 | 4.46E-06 | 12723             | 12673        | 1.15 | 5.16E-13 | Height tails |
| rs1415701  | 6   | 130387528 | L3MBTL3            | g             | a            | 0.73               | 6830      | 6818         | 1.18 | 1.17E-08 | 3628      | 3579         | 1.20 | 9.25E-06 | 10458             | 10397        | 1.19 | 5.39E-13 | Height tails |
| rs2093210  | 14  | 60027032  | C14orf39           | c             | t            | 0.42               | 7769      | 7766         | 1.18 | 1.61E-09 | 4698      | 4644         | 1.14 | 7.10E-05 | 12467             | 12410        | 1.16 | 7.66E-13 | Height tails |

Supplementary Table 6. Results for all SNPs taken forward for replication that reached genome-wide significance ( $P < 5 \times 10^{-8}$ )

| SNP        | Chr | Position  | Gene            | Effect allele | Other allele | Effect allele freq | Stage 1   |              |      |          | Stage 2   |              |      |          | Stage 1 + Stage 2 |              |      |          | Trait        |
|------------|-----|-----------|-----------------|---------------|--------------|--------------------|-----------|--------------|------|----------|-----------|--------------|------|----------|-------------------|--------------|------|----------|--------------|
|            |     |           |                 |               |              |                    | No. cases | No. controls | OR   | P        | No. cases | No. controls | OR   | P        | No. cases         | No. controls | OR   | P        |              |
| rs2744971  | 6   | 34689614  | <i>C6orf106</i> | g             | t            | 0.15               | 5909      | 5894         | 1.29 | 6.10E-10 | 3544      | 3492         | 1.21 | 1.91E-04 | 9453              | 9386         | 1.26 | 8.21E-13 | Height tails |
| rs572169   | 3   | 173648421 | <i>GHSR</i>     | t             | c            | 0.31               | 7617      | 7617         | 1.19 | 2.99E-10 | 4638      | 4586         | 1.13 | 3.91E-04 | 12255             | 12203        | 1.17 | 1.11E-12 | Height tails |
| rs11880992 | 19  | 2127403   | <i>DOT1L</i>    | a             | g            | 0.39               | 7711      | 7730         | 1.14 | 5.53E-07 | 4857      | 4816         | 1.17 | 5.12E-07 | 12568             | 12546        | 1.15 | 1.54E-12 | Height tails |
| rs2564921  | 3   | 53100625  | <i>RFT1</i>     | t             | c            | 0.43               | 7905      | 7921         | 1.16 | 1.07E-08 | 4725      | 4690         | 1.14 | 3.92E-05 | 12630             | 12611        | 1.15 | 2.06E-12 | Height tails |
| rs2025151  | 9   | 98201333  | <i>ZNF367</i>   | g             | c            | 0.18               | 6048      | 6037         | 1.23 | 6.82E-08 | 4150      | 4104         | 1.21 | 7.12E-06 | 10199             | 10141        | 1.22 | 2.28E-12 | Height tails |
| rs2247056  | 6   | 31373469  | <i>HLA-C</i>    | t             | c            | 0.27               | 7182      | 7171         | 1.21 | 1.50E-10 | 4280      | 4228         | 1.13 | 1.69E-03 | 11462             | 11399        | 1.18 | 3.61E-12 | Height tails |
| rs12455370 | 18  | 19069221  | <i>CABLES1</i>  | t             | c            | 0.74               | 6875      | 6860         | 1.18 | 3.32E-07 | 4493      | 4441         | 1.19 | 2.41E-06 | 11368             | 11301        | 1.19 | 3.65E-12 | Height tails |
| rs10058074 | 5   | 131714045 | <i>FLJ44796</i> | a             | g            | 0.45               | 7845      | 7848         | 1.17 | 1.43E-09 | 4731      | 4693         | 1.12 | 4.36E-04 | 12576             | 12541        | 1.15 | 4.46E-12 | Height tails |
| rs9391253  | 6   | 105474309 | <i>LIN28B</i>   | t             | a            | 0.32               | 7565      | 7587         | 1.19 | 1.42E-10 | 4610      | 4557         | 1.11 | 2.03E-03 | 12175             | 12144        | 1.16 | 4.79E-12 | Height tails |
| rs6141600  | 20  | 34175724  | <i>EPB41L1</i>  | c             | t            | 0.28               | 7351      | 7376         | 1.20 | 2.87E-09 | 1715      | 1713         | 1.23 | 4.36E-04 | 9066              | 9089         | 1.21 | 5.63E-12 | Height tails |
| rs10843164 | 12  | 28460981  | <i>CCDC91</i>   | t             | c            | 0.68               | 7293      | 7314         | 1.16 | 2.64E-07 | 4740      | 4701         | 1.16 | 4.93E-06 | 12033             | 12015        | 1.16 | 5.84E-12 | Height tails |
| rs10185077 | 2   | 56051616  | <i>EFEMP1</i>   | t             | g            | 0.60               | 7765      | 7795         | 1.17 | 2.38E-09 | 4077      | 4023         | 1.13 | 3.97E-04 | 11842             | 11818        | 1.16 | 5.92E-12 | Height tails |
| rs13428823 | 2   | 25226802  | <i>POMC</i>     | g             | a            | 0.37               | 7925      | 7941         | 1.17 | 2.80E-09 | 1983      | 1995         | 1.18 | 5.07E-04 | 9908              | 9936         | 1.17 | 5.98E-12 | Height tails |
| rs12075079 | 1   | 170486618 | <i>DNM3</i>     | g             | a            | 0.21               | 6394      | 6385         | 1.20 | 1.34E-07 | 4183      | 4131         | 1.20 | 1.18E-05 | 10577             | 10516        | 1.20 | 7.09E-12 | Height tails |
| rs10838798 | 11  | 48047879  | <i>PTPRJ</i>    | t             | g            | 0.31               | 7595      | 7608         | 1.17 | 4.02E-08 | 4770      | 4731         | 1.15 | 3.78E-05 | 12365             | 12339        | 1.16 | 7.10E-12 | Height tails |
| rs13210323 | 6   | 35113062  | <i>ANKS1A</i>   | a             | c            | 0.73               | 7262      | 7288         | 1.19 | 1.12E-08 | 4475      | 4422         | 1.15 | 1.35E-04 | 11737             | 11710        | 1.17 | 7.59E-12 | Height tails |
| rs1432559  | 2   | 56043122  | <i>EFEMP1</i>   | g             | t            | 0.20               | 6185      | 6186         | 1.24 | 2.95E-09 | 4061      | 4013         | 1.17 | 4.07E-04 | 10246             | 10199        | 1.21 | 8.93E-12 | Height tails |
| rs1950500  | 14  | 23900690  | <i>NFATC4</i>   | t             | c            | 0.30               | 7360      | 7369         | 1.16 | 1.22E-07 | 4659      | 4620         | 1.16 | 2.25E-05 | 12019             | 11989        | 1.16 | 1.17E-11 | Height tails |
| rs2856321  | 12  | 11747040  | <i>ETV6</i>     | g             | a            | 0.37               | 7833      | 7850         | 1.17 | 1.17E-09 | 4810      | 4770         | 1.10 | 1.82E-03 | 12643             | 12620        | 1.14 | 2.66E-11 | Height tails |
| rs17361789 | 1   | 170389224 | <i>DNM3</i>     | g             | t            | 0.30               | 7292      | 7318         | 1.21 | 7.57E-10 | 1820      | 1829         | 1.15 | 1.19E-02 | 9112              | 9147         | 1.20 | 3.82E-11 | Height tails |
| rs10948222 | 6   | 45352393  | <i>SUPT3H</i>   | c             | t            | 0.60               | 7767      | 7795         | 1.16 | 1.67E-07 | 4225      | 4173         | 1.14 | 6.33E-05 | 11992             | 11968        | 1.15 | 4.54E-11 | Height tails |
| rs7741091  | 6   | 31460610  | <i>HLA-B</i>    | a             | g            | 0.68               | 7640      | 7664         | 1.16 | 6.75E-08 | 4720      | 4679         | 1.13 | 1.65E-04 | 12360             | 12343        | 1.15 | 5.49E-11 | Height tails |
| rs10492321 | 12  | 92504219  | <i>SOCS2</i>    | a             | t            | 0.21               | 6390      | 6377         | 1.27 | 9.44E-10 | 1070      | 1069         | 1.24 | 2.39E-02 | 7460              | 7446         | 1.26 | 7.07E-11 | Height tails |
| rs310405   | 6   | 81857081  | <i>FAM46A</i>   | a             | g            | 0.52               | 7964      | 7967         | 1.17 | 1.05E-09 | 4478      | 4429         | 1.09 | 8.16E-03 | 12443             | 12396        | 1.14 | 1.18E-10 | Height tails |
| rs9388768  | 6   | 130415795 | <i>L3MBTL3</i>  | c             | a            | 0.33               | 7664      | 7686         | 1.13 | 1.28E-06 | 4777      | 4738         | 1.15 | 2.15E-05 | 12441             | 12424        | 1.14 | 1.32E-10 | Height tails |
| rs6450922  | 5   | 32725475  | <i>NPR3</i>     | c             | g            | 0.75               | 6804      | 6801         | 1.24 | 4.27E-08 | 3743      | 3688         | 1.16 | 4.15E-04 | 10547             | 10488        | 1.20 | 1.46E-10 | Height tails |
| rs7466269  | 9   | 132453905 | <i>FUBP3</i>    | a             | g            | 0.64               | 7872      | 7889         | 1.13 | 2.33E-06 | 4785      | 4745         | 1.14 | 2.09E-05 | 12657             | 12634        | 1.14 | 2.10E-10 | Height tails |
| rs1545552  | 2   | 33213842  | <i>LTBP1</i>    | g             | a            | 0.72               | 7420      | 7440         | 1.17 | 2.62E-07 | 4738      | 4699         | 1.14 | 1.73E-04 | 12158             | 12139        | 1.15 | 2.33E-10 | Height tails |
| rs718444   | 13  | 32045052  | <i>APRN</i>     | t             | c            | 0.37               | 7878      | 7894         | 1.17 | 2.21E-09 | 4837      | 4795         | 1.09 | 7.22E-03 | 12715             | 12689        | 1.14 | 2.37E-10 | Height tails |
| rs2844479  | 6   | 31680935  | <i>AIF1</i>     | a             | c            | 0.66               | 7628      | 7642         | 1.16 | 2.01E-07 | 4734      | 4682         | 1.13 | 2.82E-04 | 12362             | 12324        | 1.14 | 2.68E-10 | Height tails |
| rs153750   | 5   | 171113842 | <i>FBXW11</i>   | g             | t            | 0.62               | 7827      | 7845         | 1.18 | 1.67E-09 | 1814      | 1814         | 1.11 | 4.12E-02 | 9641              | 9659         | 1.16 | 2.93E-10 | Height tails |

Supplementary Table 6. Results for all SNPs taken forward for replication that reached genome-wide significance ( $P < 5 \times 10^{-8}$ )

| SNP        | Chr | Position  | Gene              | Effect allele | Other allele | Effect allele freq | Stage 1   |              |      |          | Stage 2   |              |      |          | Stage 1 + Stage 2 |              |      |           | Trait           |
|------------|-----|-----------|-------------------|---------------|--------------|--------------------|-----------|--------------|------|----------|-----------|--------------|------|----------|-------------------|--------------|------|-----------|-----------------|
|            |     |           |                   |               |              |                    | No. cases | No. controls | OR   | P        | No. cases | No. controls | OR   | P        | No. cases         | No. controls | OR   | P         |                 |
| rs2982712  | 6   | 152399872 | <i>ESR1</i>       | c             | t            | 0.47               | 7860      | 7874         | 1.17 | 1.33E-08 | 1814      | 1814         | 1.15 | 7.66E-03 | 9674              | 9688         | 1.17 | 3.66E-10  | Height tails    |
| rs6957923  | 7   | 23449210  | <i>IGF2BP3</i>    | g             | a            | 0.63               | 7628      | 7645         | 1.16 | 5.63E-08 | 4513      | 4466         | 1.11 | 1.70E-03 | 12141             | 12111        | 1.14 | 5.39E-10  | Height tails    |
| rs4965593  | 15  | 98575908  | <i>ADAMTS17</i>   | c             | g            | 0.32               | 7545      | 7558         | 1.16 | 1.00E-07 | 4477      | 4427         | 1.12 | 1.40E-03 | 12022             | 11985        | 1.15 | 7.24E-10  | Height tails    |
| rs526896   | 5   | 134384604 | <i>PITX1</i>      | t             | g            | 0.72               | 7376      | 7374         | 1.16 | 6.00E-07 | 4775      | 4734         | 1.13 | 3.07E-04 | 12151             | 12108        | 1.15 | 8.62E-10  | Height tails    |
| rs9596219  | 13  | 49461448  | <i>TRIM13</i>     | t             | c            | 0.25               | 6874      | 6865         | 1.19 | 4.93E-08 | 4500      | 4449         | 1.11 | 3.64E-03 | 11374             | 11314        | 1.16 | 1.44E-09  | Height tails    |
| rs10838708 | 11  | 47398089  | <i>PSMC3</i>      | g             | a            | 0.53               | 7983      | 7987         | 1.17 | 9.93E-10 | 1899      | 1908         | 1.07 | 1.71E-01 | 9882              | 9895         | 1.15 | 1.52E-09  | Height tails    |
| rs780151   | 10  | 80601487  | <i>ZMIZ1</i>      | g             | a            | 0.57               | 7957      | 7962         | 1.14 | 2.53E-07 | 4561      | 4520         | 1.11 | 1.43E-03 | 12518             | 12482        | 1.13 | 1.74E-09  | Height tails    |
| rs4075154  | 8   | 57371800  | <i>RDHE2</i>      | a             | g            | 0.87               | 5206      | 5206         | 1.33 | 4.00E-09 | 1267      | 1266         | 1.16 | 1.39E-01 | 6473              | 6472         | 1.29 | 2.70E-09  | Height tails    |
| rs2322633  | 6   | 80902708  | <i>BCKDHB</i>     | t             | c            | 0.50               | 7982      | 7987         | 1.14 | 1.94E-07 | 4900      | 4860         | 1.10 | 2.31E-03 | 12882             | 12847        | 1.12 | 2.72E-09  | Height tails    |
| rs10475992 | 5   | 171267898 | <i>FBXW11</i>     | t             | c            | 0.52               | 7502      | 7506         | 1.20 | 8.93E-09 | 4673      | 4633         | 1.09 | 8.35E-03 | 12175             | 12139        | 1.14 | 2.97E-09  | Height tails    |
| rs11209718 | 1   | 41461525  | <i>SCMH1</i>      | t             | c            | 0.44               | 7920      | 7924         | 1.14 | 2.22E-07 | 4817      | 4778         | 1.10 | 2.39E-03 | 12737             | 12702        | 1.12 | 3.09E-09  | Height tails    |
| rs10231759 | 7   | 150143105 | <i>TMEM176A</i>   | c             | t            | 0.28               | 7307      | 7343         | 1.17 | 1.64E-08 | 1951      | 1963         | 1.10 | 5.66E-02 | 9258              | 9306         | 1.15 | 3.91E-09  | Height tails    |
| rs4953076  | 2   | 44334454  | <i>PPM1B</i>      | g             | c            | 0.25               | 7116      | 7107         | 1.15 | 3.20E-06 | 4670      | 4631         | 1.14 | 3.35E-04 | 11786             | 11738        | 1.15 | 4.35E-09  | Height tails    |
| rs9967417  | 18  | 45213498  | <i>DYM</i>        | g             | c            | 0.42               | 7667      | 7676         | 1.14 | 1.60E-07 | 4704      | 4651         | 1.09 | 5.22E-03 | 12371             | 12327        | 1.13 | 5.11E-09  | Height tails    |
| rs4337252  | 15  | 72013818  | <i>LOXL1</i>      | c             | g            | 0.50               | 8049      | 8050         | 1.14 | 2.10E-07 | 1983      | 1995         | 1.13 | 9.32E-03 | 10032             | 10045        | 1.14 | 6.58E-09  | Height tails    |
| rs1724888  | 7   | 2707545   | <i>AMZ1</i>       | c             | g            | 0.73               | 5348      | 5357         | 1.21 | 4.29E-06 | 4391      | 4337         | 1.15 | 4.06E-04 | 9739              | 9693         | 1.18 | 1.15E-08  | Height tails    |
| rs9285425  | 6   | 117978529 | <i>DCBLD1</i>     | g             | a            | 0.50               | 7951      | 7952         | 1.13 | 1.02E-06 | 1983      | 1995         | 1.14 | 4.74E-03 | 9934              | 9947         | 1.14 | 1.60E-08  | Height tails    |
| rs6750795  | 2   | 232086475 | <i>C2orf52</i>    | t             | c            | 0.44               | 7950      | 7969         | 1.13 | 1.06E-06 | 4903      | 4862         | 1.09 | 3.13E-03 | 12853             | 12831        | 1.12 | 1.73E-08  | Height tails    |
| rs6855629  | 4   | 106353765 | <i>KIAA1546</i>   | g             | a            | 0.63               | 7791      | 7807         | 1.14 | 1.07E-06 | 1814      | 1814         | 1.15 | 5.36E-03 | 9605              | 9621         | 1.14 | 2.01E-08  | Height tails    |
| rs17511102 | 2   | 37814117  | <i>CDC42EP3</i>   | t             | a            | 0.09               | 4104      | 4100         | 1.41 | 9.89E-08 | 708       | 709          | 1.33 | 8.78E-02 | 4812              | 4809         | 1.40 | 2.36E-08  | Height tails    |
| rs7552186  | 1   | 217061896 | <i>LYPLAL1</i>    | c             | t            | 0.62               | 7801      | 7816         | 1.13 | 2.90E-06 | 4874      | 4833         | 1.10 | 2.30E-03 | 12675             | 12649        | 1.12 | 3.03E-08  | Height tails    |
| rs3103267  | 2   | 232696826 | <i>DIS3L2</i>     | c             | a            | 0.72               | 7181      | 7201         | 1.17 | 1.49E-07 | 1814      | 1814         | 1.11 | 5.74E-02 | 8995              | 9015         | 1.16 | 3.19E-08  | Height tails    |
| rs8043757  | 16  | 52370951  | <i>FTO</i>        | t             | a            | 0.40               | 32577     | 65746        | 1.24 | 2.44E-66 | 21792     | 37471        | 1.22 | 2.42E-45 | 54369             | 103217       | 1.23 | 4.98E-110 | Obesity class 1 |
| rs6711012  | 2   | 614034    | <i>TMEM18</i>     | c             | g            | 0.82               | 32108     | 64305        | 1.19 | 3.18E-25 | 20696     | 35123        | 1.17 | 8.89E-17 | 52804             | 99428        | 1.18 | 2.96E-40  | Obesity class 1 |
| rs538656   | 18  | 56001402  | <i>MC4R</i>       | t             | g            | 0.24               | 31746     | 63734        | 1.14 | 2.13E-19 | 21733     | 36568        | 1.15 | 1.02E-18 | 53480             | 100302       | 1.15 | 2.03E-36  | Obesity class 1 |
| rs10938397 | 4   | 44877284  | <i>GNPDA2</i>     | g             | a            | 0.43               | 32789     | 65639        | 1.11 | 5.04E-16 | 22334     | 39032        | 1.13 | 3.91E-20 | 55123             | 104671       | 1.12 | 2.85E-34  | Obesity class 1 |
| rs633715   | 1   | 176119203 | <i>SEC16B</i>     | c             | t            | 0.19               | 32294     | 64436        | 1.12 | 7.21E-13 | 18412     | 34561        | 1.13 | 1.78E-11 | 50706             | 98997        | 1.12 | 8.57E-23  | Obesity class 1 |
| rs2030323  | 11  | 27685115  | <i>BDNF</i>       | c             | a            | 0.79               | 32222     | 64668        | 1.11 | 2.52E-12 | 21746     | 38028        | 1.12 | 1.61E-11 | 53968             | 102696       | 1.12 | 2.92E-22  | Obesity class 1 |
| rs2206277  | 6   | 50906485  | <i>TFAP2B</i>     | t             | c            | 0.18               | 30821     | 63877        | 1.14 | 1.35E-16 | 20843     | 34865        | 1.10 | 2.29E-07 | 51664             | 98742        | 1.12 | 4.90E-22  | Obesity class 1 |
| rs7138803  | 12  | 48533735  | <i>LOC144233</i>  | a             | g            | 0.38               | 32843     | 65810        | 1.09 | 2.61E-11 | 21795     | 37472        | 1.10 | 6.32E-11 | 54638             | 103282       | 1.09 | 9.67E-21  | Obesity class 1 |
| rs10182181 | 2   | 25003800  | <i>ADCY3,POMC</i> | g             | a            | 0.46               | 32834     | 65801        | 1.08 | 3.30E-09 | 22269     | 38897        | 1.09 | 4.99E-10 | 55103             | 104698       | 1.08 | 1.11E-17  | Obesity class 1 |

Supplementary Table 6. Results for all SNPs taken forward for replication that reached genome-wide significance ( $P < 5 \times 10^{-8}$ )

| SNP        | Chr | Position  | Gene             | Effect allele | Other allele | Effect allele freq | Stage 1   |              |      |          | Stage 2   |              |      |          | Stage 1 + Stage 2 |              |      |          | Trait           |
|------------|-----|-----------|------------------|---------------|--------------|--------------------|-----------|--------------|------|----------|-----------|--------------|------|----------|-------------------|--------------|------|----------|-----------------|
|            |     |           |                  |               |              |                    | No. cases | No. controls | OR   | P        | No. cases | No. controls | OR   | P        | No. cases         | No. controls | OR   | P        |                 |
| rs7141420  | 14  | 78969207  | <i>NRXN3</i>     | t             | c            | 0.52               | 32834     | 65789        | 1.08 | 2.34E-10 | 22371     | 39054        | 1.08 | 1.04E-08 | 55205             | 104843       | 1.08 | 1.27E-17 | Obesity class 1 |
| rs7531118  | 1   | 72609827  | <i>NEGR1</i>     | c             | t            | 0.56               | 32812     | 65711        | 1.08 | 4.62E-10 | 21511     | 36320        | 1.09 | 6.90E-09 | 54323             | 102031       | 1.08 | 1.94E-17 | Obesity class 1 |
| rs10835211 | 11  | 27657941  | <i>BDNF</i>      | a             | g            | 0.25               | 32641     | 64798        | 1.09 | 4.36E-09 | 21670     | 36999        | 1.08 | 4.45E-07 | 54311             | 101797       | 1.08 | 9.43E-15 | Obesity class 1 |
| rs1800437  | 19  | 50873232  | <i>GIPR</i>      | g             | c            | 0.78               | 27534     | 58036        | 1.09 | 1.03E-06 | 21166     | 36441        | 1.11 | 3.94E-09 | 48700             | 94478        | 1.10 | 2.86E-14 | Obesity class 1 |
| rs9816226  | 3   | 187317193 | <i>ETV5</i>      | t             | a            | 0.82               | 32057     | 64298        | 1.12 | 1.02E-11 | 20860     | 35337        | 1.07 | 6.36E-04 | 52917             | 99634        | 1.10 | 1.57E-13 | Obesity class 1 |
| rs7498665  | 16  | 28790742  | <i>SH2B1</i>     | g             | a            | 0.40               | 32790     | 65703        | 1.07 | 6.05E-08 | 21547     | 37516        | 1.07 | 9.57E-07 | 54337             | 103219       | 1.07 | 2.50E-13 | Obesity class 1 |
| rs13333228 | 16  | 52351299  | <i>FTO</i>       | c             | t            | 0.67               | 32813     | 65015        | 1.08 | 4.67E-08 | 22159     | 38017        | 1.07 | 2.75E-06 | 54971             | 103032       | 1.07 | 5.77E-13 | Obesity class 1 |
| rs8028313  | 15  | 65830111  | <i>MAP2K5</i>    | c             | g            | 0.78               | 32321     | 64522        | 1.11 | 1.68E-11 | 21670     | 37028        | 1.06 | 1.13E-03 | 53991             | 101550       | 1.08 | 6.35E-13 | Obesity class 1 |
| rs2307111  | 5   | 75039434  | <i>C5orf37</i>   | t             | c            | 0.60               | 32799     | 65689        | 1.07 | 3.35E-08 | 22367     | 39048        | 1.06 | 2.05E-05 | 55166             | 104737       | 1.07 | 3.39E-12 | Obesity class 1 |
| rs11042023 | 11  | 8619092   | <i>RPL27A</i>    | c             | t            | 0.65               | 32855     | 65834        | 1.08 | 1.07E-08 | 22373     | 39060        | 1.05 | 1.59E-04 | 55228             | 104894       | 1.07 | 1.38E-11 | Obesity class 1 |
| rs12996547 | 2   | 592036    | <i>TMEM18</i>    | t             | c            | 0.36               | 32852     | 65829        | 1.08 | 5.37E-09 | 21793     | 37473        | 1.05 | 8.33E-04 | 54645             | 103302       | 1.07 | 5.10E-11 | Obesity class 1 |
| rs887912   | 2   | 59156381  | <i>FANCL</i>     | t             | c            | 0.28               | 32641     | 64784        | 1.09 | 2.32E-09 | 21766     | 37007        | 1.05 | 2.79E-03 | 54407             | 101791       | 1.07 | 1.22E-10 | Obesity class 1 |
| rs12446632 | 16  | 19842890  | <i>GPRC5B</i>    | g             | a            | 0.86               | 31389     | 62749        | 1.10 | 7.70E-08 | 19994     | 34518        | 1.08 | 3.43E-04 | 51383             | 97267        | 1.09 | 1.50E-10 | Obesity class 1 |
| rs2817419  | 6   | 50920865  | <i>TFAP2B</i>    | a             | g            | 0.74               | 31081     | 63970        | 1.08 | 5.25E-07 | 22106     | 37114        | 1.06 | 2.36E-04 | 53187             | 101084       | 1.07 | 6.89E-10 | Obesity class 1 |
| rs9302652  | 16  | 52423476  | <i>FTO</i>       | c             | t            | 0.28               | 32267     | 63887        | 1.09 | 9.59E-10 | 21442     | 36520        | 1.04 | 2.16E-02 | 53709             | 100407       | 1.07 | 1.16E-09 | Obesity class 1 |
| rs11075986 | 16  | 52362845  | <i>FTO</i>       | c             | g            | 0.92               | 27644     | 55775        | 1.15 | 4.28E-07 | 17700     | 30380        | 1.10 | 1.19E-03 | 45344             | 86155        | 1.12 | 3.54E-09 | Obesity class 1 |
| rs1514177  | 1   | 74763990  | <i>TNNI3K</i>    | c             | g            | 0.43               | 32839     | 65817        | 1.06 | 9.01E-07 | 21512     | 36324        | 1.05 | 1.05E-03 | 54351             | 102141       | 1.06 | 4.65E-09 | Obesity class 1 |
| rs1879523  | 2   | 641599    | <i>TMEM18</i>    | t             | a            | 0.33               | 32503     | 64582        | 1.06 | 3.93E-06 | 21831     | 37737        | 1.05 | 4.68E-04 | 54334             | 102319       | 1.06 | 7.77E-09 | Obesity class 1 |
| rs4438957  | 6   | 51253131  | <i>TFAP2B</i>    | c             | g            | 0.25               | 30807     | 63684        | 1.08 | 1.24E-06 | 6353      | 15531        | 1.08 | 5.63E-03 | 37160             | 79215        | 1.08 | 2.24E-08 | Obesity class 1 |
| rs10968576 | 9   | 28404339  | <i>LINGO2</i>    | g             | a            | 0.32               | 31375     | 64518        | 1.07 | 3.89E-07 | 6353      | 15531        | 1.06 | 2.75E-02 | 37728             | 80049        | 1.07 | 3.34E-08 | Obesity class 1 |
| rs7185735  | 16  | 52380152  | <i>FTO</i>       | g             | a            | 0.40               | 9840      | 62087        | 1.33 | 1.34E-50 | 5312      | 32805        | 1.33 | 1.40E-30 | 15152             | 94892        | 1.33 | 1.39E-79 | Obesity class 2 |
| rs10189761 | 2   | 636364    | <i>TMEM18</i>    | a             | t            | 0.82               | 9315      | 56184        | 1.26 | 5.04E-19 | 4447      | 25793        | 1.20 | 1.09E-06 | 13762             | 81977        | 1.24 | 6.12E-24 | Obesity class 2 |
| rs11152213 | 18  | 56003928  | <i>MC4R</i>      | c             | a            | 0.24               | 9515      | 59270        | 1.19 | 6.68E-14 | 4855      | 27911        | 1.20 | 5.38E-10 | 14370             | 87181        | 1.19 | 2.65E-22 | Obesity class 2 |
| rs2207139  | 6   | 50953449  | <i>TFAP2B</i>    | g             | a            | 0.18               | 8603      | 54397        | 1.19 | 8.18E-12 | 4755      | 27337        | 1.22 | 5.35E-09 | 13358             | 81734        | 1.20 | 2.72E-19 | Obesity class 2 |
| rs633715   | 1   | 176119203 | <i>SEC16B</i>    | c             | t            | 0.19               | 9384      | 56080        | 1.18 | 2.65E-11 | 4153      | 27392        | 1.21 | 1.82E-09 | 13538             | 83472        | 1.19 | 4.00E-19 | Obesity class 2 |
| rs13130484 | 4   | 44870448  | <i>GNPDA2</i>    | t             | c            | 0.43               | 9830      | 61932        | 1.13 | 1.58E-09 | 5475      | 35421        | 1.16 | 1.78E-10 | 15305             | 97353        | 1.14 | 2.84E-18 | Obesity class 2 |
| rs7138803  | 12  | 48533735  | <i>LOC144233</i> | a             | g            | 0.38               | 9818      | 61723        | 1.14 | 2.03E-11 | 5352      | 33839        | 1.13 | 1.00E-06 | 15170             | 95562        | 1.14 | 1.23E-16 | Obesity class 2 |
| rs3101336  | 1   | 72523773  | <i>NEGR1</i>     | c             | t            | 0.61               | 9808      | 61868        | 1.12 | 5.42E-09 | 5474      | 35427        | 1.12 | 4.20E-06 | 15282             | 97295        | 1.12 | 1.17E-13 | Obesity class 2 |
| rs10423928 | 19  | 50874144  | <i>GIPR</i>      | t             | a            | 0.77               | 8422      | 53974        | 1.14 | 1.12E-06 | 4859      | 28377        | 1.20 | 3.07E-08 | 13281             | 82351        | 1.16 | 3.58E-13 | Obesity class 2 |
| rs9956279  | 18  | 56093779  | <i>MC4R</i>      | t             | c            | 0.31               | 9618      | 60277        | 1.13 | 6.33E-09 | 4520      | 24736        | 1.13 | 2.93E-05 | 14138             | 85013        | 1.13 | 7.99E-13 | Obesity class 2 |
| rs2030323  | 11  | 27685115  | <i>BDNF</i>      | c             | a            | 0.79               | 9419      | 57138        | 1.14 | 5.21E-08 | 5174      | 31604        | 1.12 | 2.33E-04 | 14593             | 88742        | 1.13 | 5.89E-11 | Obesity class 2 |



Supplementary Table 6. Results for all SNPs taken forward for replication that reached genome-wide significance ( $P < 5 \times 10^{-8}$ )

| SNP        | Chr | Position  | Gene         | Effect allele | Other allele | Effect allele freq | Stage 1   |              |      |          | Stage 2   |              |      |          | Stage 1 + Stage 2 |              |      |          | Trait           |
|------------|-----|-----------|--------------|---------------|--------------|--------------------|-----------|--------------|------|----------|-----------|--------------|------|----------|-------------------|--------------|------|----------|-----------------|
|            |     |           |              |               |              |                    | No. cases | No. controls | OR   | P        | No. cases | No. controls | OR   | P        | No. cases         | No. controls | OR   | P        |                 |
| rs1412239  | 9   | 28415515  | LINGO2       | g             | c            | 0.32               | 9054      | 60650        | 1.10 | 1.63E-06 | 5269      | 32150        | 1.11 | 2.76E-05 | 14323             | 92800        | 1.11 | 1.92E-10 | Obesity class 2 |
| rs2817419  | 6   | 50920865  | TFAP2B       | a             | g            | 0.74               | 8894      | 58222        | 1.13 | 8.29E-08 | 5343      | 33634        | 1.10 | 8.03E-04 | 14237             | 91856        | 1.12 | 3.78E-10 | Obesity class 2 |
| rs9568867  | 13  | 53005353  | OLFM4        | a             | g            | 0.13               | 8975      | 52803        | 1.14 | 7.52E-06 | 4433      | 26219        | 1.17 | 5.25E-05 | 13408             | 79021        | 1.15 | 1.71E-09 | Obesity class 2 |
| rs1516725  | 3   | 187306698 | ETV5         | c             | t            | 0.86               | 8886      | 52129        | 1.21 | 1.17E-10 | 4504      | 26646        | 1.05 | 2.06E-01 | 13390             | 78775        | 1.15 | 2.68E-09 | Obesity class 2 |
| rs9302652  | 16  | 52423476  | FTO          | c             | t            | 0.28               | 9708      | 60599        | 1.12 | 1.15E-07 | 5219      | 32045        | 1.08 | 5.36E-03 | 14927             | 92644        | 1.10 | 3.89E-09 | Obesity class 2 |
| rs2112347  | 5   | 75050998  | C5orf37      | t             | g            | 0.63               | 9839      | 62112        | 1.11 | 3.68E-07 | 5475      | 35430        | 1.08 | 2.09E-03 | 15314             | 97542        | 1.09 | 3.95E-09 | Obesity class 2 |
| rs11639988 | 16  | 19851864  | GPRC5B       | a             | g            | 0.86               | 9043      | 53231        | 1.19 | 8.29E-09 | 4459      | 25840        | 1.09 | 4.00E-02 | 13502             | 79071        | 1.15 | 4.02E-09 | Obesity class 2 |
| rs887912   | 2   | 59156381  | FANCL        | t             | c            | 0.28               | 9750      | 61125        | 1.11 | 9.93E-07 | 5219      | 32050        | 1.09 | 1.66E-03 | 14969             | 93175        | 1.10 | 6.46E-09 | Obesity class 2 |
| rs7184597  | 16  | 28829310  | RABEP2,SH2B1 | t             | c            | 0.33               | 9702      | 60757        | 1.12 | 5.11E-07 | 5351      | 33836        | 1.08 | 2.42E-03 | 15053             | 94593        | 1.10 | 6.77E-09 | Obesity class 2 |
| rs1421085  | 16  | 52358455  | FTO          | c             | t            | 0.41               | 2825      | 44703        | 1.45 | 3.93E-26 | 1162      | 22307        | 1.47 | 2.11E-14 | 3986              | 67010        | 1.45 | 6.25E-39 | Obesity class 3 |
| rs1558902  | 16  | 52361075  | FTO          | a             | t            | 0.41               | 92910     | 65769        | 1.15 | 1.53E-49 | 63198     | 37852        | 1.13 | 3.71E-34 | 156108            | 103621       | 1.14 | 1.84E-81 | Overweight      |
| rs6711012  | 2   | 614034    | TMEM18       | c             | g            | 0.82               | 91720     | 65561        | 1.12 | 3.54E-21 | 61797     | 37446        | 1.11 | 1.43E-15 | 153517            | 103007       | 1.11 | 5.91E-35 | Overweight      |
| rs13130484 | 4   | 44870448  | GNPDA2       | t             | c            | 0.43               | 92824     | 65636        | 1.07 | 3.95E-14 | 65326     | 39285        | 1.08 | 1.30E-15 | 158150            | 104921       | 1.08 | 4.10E-28 | Overweight      |
| rs10871777 | 18  | 56002743  | MC4R         | g             | a            | 0.24               | 90380     | 64984        | 1.10 | 2.35E-20 | 22395     | 16437        | 1.11 | 1.46E-08 | 112775            | 81421        | 1.10 | 1.67E-27 | Overweight      |
| rs633715   | 1   | 176119203 | SEC16B       | c             | t            | 0.20               | 92101     | 65685        | 1.08 | 4.05E-12 | 56249     | 35297        | 1.08 | 2.86E-09 | 148350            | 100982       | 1.08 | 6.78E-20 | Overweight      |
| rs2030323  | 11  | 27685115  | BDNF         | c             | a            | 0.79               | 91950     | 65670        | 1.08 | 1.15E-12 | 64289     | 39168        | 1.06 | 2.94E-06 | 156238            | 104838       | 1.07 | 5.40E-17 | Overweight      |
| rs2568958  | 1   | 72537704  | NEGR1        | a             | g            | 0.61               | 92598     | 65803        | 1.06 | 1.05E-11 | 65307     | 39283        | 1.05 | 2.96E-06 | 157905            | 105086       | 1.06 | 3.57E-16 | Overweight      |
| rs2206277  | 6   | 50906485  | TFAP2B       | t             | c            | 0.18               | 89774     | 65154        | 1.08 | 5.58E-12 | 61253     | 36486        | 1.06 | 1.32E-05 | 151027            | 101640       | 1.07 | 6.61E-16 | Overweight      |
| rs9816226  | 3   | 187317193 | ETV5         | t             | a            | 0.82               | 91789     | 65612        | 1.07 | 2.02E-09 | 61133     | 36478        | 1.07 | 2.02E-06 | 152921            | 102089       | 1.07 | 1.81E-14 | Overweight      |
| rs10182181 | 2   | 25003800  | ADCY3,POMC   | g             | a            | 0.46               | 92951     | 65801        | 1.06 | 2.09E-10 | 64962     | 39128        | 1.04 | 1.38E-05 | 157913            | 104929       | 1.05 | 3.04E-14 | Overweight      |
| rs12446554 | 16  | 19842574  | GPRC5B       | g             | t            | 0.86               | 91280     | 65564        | 1.08 | 1.95E-09 | 60393     | 36469        | 1.06 | 2.36E-04 | 151673            | 102033       | 1.07 | 3.69E-12 | Overweight      |
| rs7498665  | 16  | 28790742  | SH2B1        | g             | a            | 0.40               | 92810     | 65704        | 1.05 | 5.39E-08 | 62819     | 37694        | 1.04 | 1.57E-05 | 155629            | 103398       | 1.05 | 4.74E-12 | Overweight      |
| rs8028313  | 15  | 65830111  | MAP2K5       | c             | g            | 0.79               | 92150     | 65726        | 1.07 | 2.02E-09 | 63530     | 37893        | 1.04 | 5.11E-04 | 155680            | 103619       | 1.06 | 1.42E-11 | Overweight      |
| rs10835211 | 11  | 27657941  | BDNF         | a             | g            | 0.25               | 92601     | 65800        | 1.06 | 1.41E-07 | 63831     | 37271        | 1.05 | 2.52E-05 | 156432            | 103071       | 1.05 | 1.74E-11 | Overweight      |
| rs13078807 | 3   | 85966840  | CADM2        | g             | a            | 0.20               | 92163     | 65726        | 1.06 | 1.11E-07 | 61529     | 37385        | 1.05 | 6.44E-05 | 153692            | 103111       | 1.06 | 3.47E-11 | Overweight      |
| rs10875976 | 12  | 48512734  | LOC144233    | a             | g            | 0.49               | 92859     | 65716        | 1.05 | 7.09E-07 | 63290     | 37708        | 1.04 | 6.50E-05 | 156149            | 103424       | 1.04 | 2.30E-10 | Overweight      |
| rs4615388  | 6   | 51254979  | TFAP2B       | a             | t            | 0.25               | 89366     | 64757        | 1.06 | 4.27E-08 | 22395     | 16440        | 1.06 | 3.87E-03 | 111762            | 81197        | 1.06 | 6.47E-10 | Overweight      |
| rs12996547 | 2   | 592036    | TMEM18       | t             | c            | 0.36               | 92997     | 65830        | 1.05 | 6.16E-08 | 63285     | 37704        | 1.03 | 1.91E-03 | 156282            | 103534       | 1.04 | 1.04E-09 | Overweight      |
| rs6731302  | 2   | 58686997  | FANCL        | a             | g            | 0.44               | 92994     | 65828        | 1.04 | 1.12E-06 | 63776     | 38748        | 1.04 | 3.99E-04 | 156769            | 104576       | 1.04 | 2.48E-09 | Overweight      |
| rs2370983  | 14  | 78973129  | NRXN3        | a             | g            | 0.62               | 92992     | 65815        | 1.04 | 2.26E-06 | 63269     | 37700        | 1.04 | 3.31E-04 | 156260            | 103515       | 1.04 | 3.31E-09 | Overweight      |
| rs9947301  | 18  | 56020570  | MC4R         | c             | t            | 0.90               | 87722     | 64194        | 1.08 | 7.16E-07 | 54330     | 32704        | 1.06 | 1.72E-03 | 142052            | 96898        | 1.08 | 5.82E-09 | Overweight      |

Supplementary Table 6. Results for all SNPs taken forward for replication that reached genome-wide significance ( $P < 5 \times 10^{-8}$ )

| SNP        | Chr | Position  | Gene           | Effect allele | Other allele | Effect allele freq | Stage 1   |              |      |          | Stage 2   |              |      |          | Stage 1 + Stage 2 |              |      |          | Trait      |
|------------|-----|-----------|----------------|---------------|--------------|--------------------|-----------|--------------|------|----------|-----------|--------------|------|----------|-------------------|--------------|------|----------|------------|
|            |     |           |                |               |              |                    | No. cases | No. controls | OR   | P        | No. cases | No. controls | OR   | P        | No. cases         | No. controls | OR   | P        |            |
| rs1514174  | 1   | 74765651  | <i>TNNI3K</i>  | c             | t            | 0.44               | 92962     | 65797        | 1.05 | 1.13E-07 | 63258     | 37699        | 1.03 | 7.28E-03 | 156219            | 103496       | 1.04 | 1.07E-08 | Overweight |
| rs2112347  | 5   | 75050998  | <i>C5orf37</i> | t             | g            | 0.63               | 92974     | 65807        | 1.05 | 2.87E-07 | 65333     | 39294        | 1.03 | 4.46E-03 | 158306            | 105101       | 1.04 | 1.25E-08 | Overweight |
| rs1294421  | 6   | 6688148   | <i>LY86</i>    | g             | t            | 0.62               | 4556      | 5247         | 1.21 | 1.62E-09 | 3351      | 3352         | 1.10 | 6.85E-03 | 7907              | 8599         | 1.16 | 2.19E-10 | WHR tails  |
| rs7745274  | 6   | 127550850 | <i>RSPO3</i>   | a             | g            | 0.55               | 4683      | 5394         | 1.15 | 3.91E-06 | 3122      | 3128         | 1.16 | 5.33E-05 | 7805              | 8522         | 1.15 | 8.80E-10 | WHR tails  |
| rs2820464  | 1   | 217759843 | <i>LYPLAL1</i> | g             | a            | 0.66               | 4384      | 5074         | 1.23 | 4.54E-10 | 3089      | 3088         | 1.06 | 1.16E-01 | 7473              | 8162         | 1.16 | 7.35E-09 | WHR tails  |
| rs13389219 | 2   | 165237122 | <i>COBLL1</i>  | c             | t            | 0.57               | 4584      | 5296         | 1.14 | 2.68E-06 | 3385      | 3387         | 1.11 | 3.09E-03 | 7969              | 8683         | 1.13 | 3.24E-08 | WHR tails  |

<sup>a</sup>Loci were considered novel if > 1 Mb from a SNP previously reported to be associated with the trait.

**Supplementary Table 7. Variance explained<sup>a</sup> by newly discovered and previously discovered SNPs for BMI and height.**

|                                             | <b>Twingene</b> | <b>LifeLines</b> | <b>Meta-analysis</b> |
|---------------------------------------------|-----------------|------------------|----------------------|
|                                             | <b>BMI</b>      |                  |                      |
| 32 previously identified SNPs               | 1.03%           | 1.11%            | 1.07%                |
| 32 previously identified SNPs + 7 new SNPs  | 1.06%           | 1.24%            | 1.16%                |
|                                             | <b>Height</b>   |                  |                      |
| 180 previously identified SNPs              | 7.77%           | 6.98%            | 7.33%                |
| 180 previously identified SNPs + 4 new SNPs | 7.77%           | 7.00%            | 7.35%                |

<sup>a</sup> Variance explained is calculated as the improvement in R<sup>2</sup> over a base model.

**Supplementary Table 8. Association results for novel genome-wide significant SNPs ( $P < 5 \times 10^{-8}$ ) and cis gene expression (cis-eqtl)**

| SNP               | Ch<br>r | Position  | Trait<br>increasing<br>allele | Other<br>allele | Tissue             | Gene                  | Effect<br>direction | P for Giant<br>SNP | P <sub>adj</sub> for<br>Giant<br>SNP | Peak SNP   | r <sup>2</sup> | P for<br>peak SNP | P <sub>adj</sub> for<br>peak SNP | Trait           |
|-------------------|---------|-----------|-------------------------------|-----------------|--------------------|-----------------------|---------------------|--------------------|--------------------------------------|------------|----------------|-------------------|----------------------------------|-----------------|
| <i>Novel loci</i> |         |           |                               |                 |                    |                       |                     |                    |                                      |            |                |                   |                                  |                 |
| rs584438          | 17      | 35852698  | c                             | a               | Blood <sup>1</sup> | <i>TNS4</i>           | +                   | 2.50E-06           | 1                                    | rs584438   | 1              | 2.50E-06          | 1                                | Height tails    |
| rs2362965         | 3       | 159592073 | t                             | a               | Omental fat        | <i>Contig42711_RC</i> | +                   | 3.87E-12           | 0.002                                | rs7624161  | 0.07           | 1.27E-63          | 2.44E-50                         | Height tails    |
| rs2362965         | 3       | 159592073 | t                             | a               | Lymphocyte         | <i>GFM1</i>           | -                   | 4.21E-05           | 0.18                                 | rs17642107 | 0.01           | 7.64E-26          | 1.68E-21                         | Height tails    |
| rs2362965         | 3       | 159592073 | t                             | a               | Subcutaneous fat   | <i>LXN</i>            | -                   | 2.13E-06           | 0.45                                 | rs4680449  | 0.29           | 1.83E-27          | 2.19E-16                         | Height tails    |
| rs2362965         | 3       | 159592073 | t                             | a               | Omental fat        | <i>RARRES1</i>        | -                   | 1.39E-06           | 0.04                                 | rs7646881  | 0.12           | 8.95E-15          | 3.07E-09                         | Height tails    |
| rs2362965         | 3       | 159592073 | t                             | a               | Lymphocyte         | <i>RSRC1</i>          | +                   | 1.72E-08           | 4.40E-05                             | rs827183   | 0.07           | 9.91E-22          | 7.90E-19                         | Height tails    |
| rs17024258        | 1       | 109948844 | t                             | c               | Blood <sup>1</sup> | <i>GSTM1L</i>         | +                   | 7.30E-07           | 0.07                                 | rs366631   | 0.06           | 4.30E-22          | 6.10E-17                         | Obesity class 1 |
| rs17024258        | 1       | 109948844 | t                             | c               | Adipose            | <i>GSTM3</i>          | +                   | 3.80E-11           | 0.01                                 | rs11101992 | 0.08           | 6.10E-94          | 3.90E-80                         | Obesity class 1 |
| rs17024258        | 1       | 109948844 | t                             | c               | Blood <sup>1</sup> | <i>GSTM3</i>          | +                   | 3.60E-08           | 0.002                                | rs4970777  | 0.03           | 2.60E-75          | 2.40E-106                        | Obesity class 1 |
| rs2531995         | 16      | 3953468   | t                             | c               | Omental fat        | <i>ADCY9</i>          | +                   | 5.83E-40           | 1                                    | rs2531995  | 1              | 5.83E-40          | 1                                | Obesity class 1 |
| rs2531995         | 16      | 3953468   | t                             | c               | Subcutaneous fat   | <i>ADCY9</i>          | +                   | 4.66E-33           | 1                                    | rs2531995  | 1              | 4.66E-33          | 1                                | Obesity class 1 |
| rs2531995         | 16      | 3953468   | t                             | c               | Adipose            | <i>ADCY9</i>          | +                   | 7.10E-28           | 2.00E-20                             | rs2601788  | 0.10           | 9.20E-33          | 4.60E-25                         | Obesity class 1 |
| rs2531995         | 16      | 3953468   | t                             | c               | Liver              | <i>ADCY9</i>          | +                   | 7.67E-24           | 1                                    | rs2531995  | 1              | 7.67E-24          | 1                                | Obesity class 1 |
| rs2531995         | 16      | 3953468   | t                             | c               | Blood <sup>1</sup> | <i>ADCY9</i>          | +                   | 3.70E-20           | 3.20E-12                             | rs2601788  | 0.10           | 8.80E-26          | 1.40E-17                         | Obesity class 1 |
| rs17381664        | 1       | 77820919  | c                             | t               | Liver              | <i>GIPC2</i>          | -                   | 4.88E-09           | 0.33                                 | rs526723   | 0.13           | 1.66E-65          | 7.77E-49                         | Obesity class 2 |
| rs17381664        | 1       | 77820919  | c                             | t               | Omental fat        | <i>GIPC2</i>          | +                   | 3.67E-08           | 0.76                                 | rs501774   | 0.15           | 2.46E-52          | 2.45E-37                         | Obesity class 2 |
| rs17381664        | 1       | 77820919  | c                             | t               | Subcutaneous fat   | <i>GIPC2</i>          | +                   | 2.54E-07           | 0.30                                 | rs513977   | 0.12           | 1.79E-41          | 1.27E-30                         | Obesity class 2 |
| rs17381664        | 1       | 77820919  | c                             | t               | Lymphocyte         | <i>NEXN</i>           | -                   | 5.04E-07           | 0.54                                 | rs6699769  | 0.19           | 1.73E-26          | 9.67E-20                         | Obesity class 2 |
| rs7503807         | 17      | 76205706  | a                             | c               | Blood <sup>1</sup> | <i>NPTX1</i>          | +                   | 8.60E-06           | 1                                    | rs9907193  | 0.18           | 8.20E-14          | 3.50E-09                         | Overweight      |

<sup>1</sup>Results from DeCode

<sup>2</sup>Results from MolOBB

**Supplementary Table 9. Association results for BMI tails and clinical classes of obesity for previously identified loci for adult body mass index**

| SNP        | Gene            | Published associated trait | Reference                       | Effect Other |        | BMI tails |          | Obesity class 3 |          | Obesity class 2 |          | Obesity class 1 |           | Overweight |          |
|------------|-----------------|----------------------------|---------------------------------|--------------|--------|-----------|----------|-----------------|----------|-----------------|----------|-----------------|-----------|------------|----------|
|            |                 |                            |                                 | allele       | allele | OR        | P        | OR              | P        | OR              | P        | OR              | P         | OR         | P        |
| rs1558902  | <i>FTO</i>      | Adult BMI                  | Speliotes et al. Nat Genet 2010 | a            | t      | 1.35      | 1.95E-51 | 1.45            | 5.86E-39 | 1.34            | 3.99E-83 | 1.24            | 1.85E-114 | 1.14       | 1.84E-81 |
| rs2815752  | <i>NEGR1</i>    | Adult BMI                  | Speliotes et al. Nat Genet 2010 | a            | g      | 1.17      | 1.19E-14 | 1.19            | 9.56E-09 | 1.13            | 5.93E-14 | 1.08            | 1.77E-15  | 1.06       | 3.55E-16 |
| rs2867125  | <i>TMEM18</i>   | Adult BMI                  | Speliotes et al. Nat Genet 2010 | c            | t      | 1.27      | 1.34E-14 | 1.25            | 1.46E-06 | 1.25            | 5.01E-24 | 1.18            | 8.85E-38  | 1.11       | 1.06E-31 |
| rs571312   | <i>MC4R</i>     | Adult BMI                  | Speliotes et al. Nat Genet 2010 | a            | c      | 1.22      | 1.62E-14 | 1.21            | 4.72E-07 | 1.18            | 5.47E-20 | 1.14            | 1.21E-30  | 1.10       | 9.83E-32 |
| rs10938397 | <i>GNPDA2</i>   | Adult BMI                  | Speliotes et al. Nat Genet 2010 | g            | a      | 1.16      | 1.76E-13 | 1.20            | 5.97E-10 | 1.14            | 3.64E-18 | 1.12            | 2.85E-34  | 1.08       | 3.19E-28 |
| rs543874   | <i>SEC16B</i>   | Adult BMI                  | Speliotes et al. Nat Genet 2010 | g            | a      | 1.22      | 5.39E-12 | 1.23            | 8.52E-07 | 1.17            | 1.41E-15 | 1.12            | 1.06E-20  | 1.08       | 8.40E-17 |
| rs987237   | <i>TFAP2B</i>   | Adult BMI                  | Speliotes et al. Nat Genet 2010 | g            | a      | 1.20      | 2.49E-11 | 1.29            | 1.22E-08 | 1.19            | 1.41E-18 | 1.12            | 6.07E-22  | 1.07       | 2.19E-16 |
| rs3810291  | <i>TMEM160</i>  | Adult BMI                  | Speliotes et al. Nat Genet 2010 | a            | g      | 1.17      | 3.68E-10 | 1.12            | 0.001    | 1.10            | 1.01E-07 | 1.07            | 1.74E-09  | 1.04       | 8.93E-08 |
| rs10767664 | <i>BDNF</i>     | Adult BMI                  | Speliotes et al. Nat Genet 2010 | a            | t      | 1.19      | 1.85E-09 | 1.10            | 0.02     | 1.15            | 4.08E-11 | 1.12            | 2.89E-18  | 1.08       | 4.69E-16 |
| rs7138803  | <i>FAIM</i>     | Adult BMI                  | Speliotes et al. Nat Genet 2010 | a            | g      | 1.13      | 2.37E-09 | 1.17            | 4.03E-08 | 1.14            | 1.23E-16 | 1.09            | 9.67E-21  | 1.05       | 1.53E-12 |
| rs9816226  | <i>ETV5</i>     | Adult BMI                  | Speliotes et al. Nat Genet 2010 | t            | a      | 1.18      | 1.25E-08 | 1.15            | 0.001    | 1.13            | 9.45E-09 | 1.10            | 1.57E-13  | 1.07       | 1.81E-14 |
| rs2287019  | <i>QPCTL</i>    | Adult BMI                  | Speliotes et al. Nat Genet 2010 | c            | t      | 1.19      | 1.72E-08 | 1.22            | 1.65E-05 | 1.16            | 4.26E-11 | 1.10            | 1.58E-12  | 1.05       | 3.00E-08 |
| rs3817334  | <i>MTCH2</i>    | Adult BMI                  | Speliotes et al. Nat Genet 2010 | t            | c      | 1.12      | 4.27E-08 | 1.09            | 0.003    | 1.07            | 8.97E-06 | 1.06            | 1.14E-10  | 1.05       | 3.73E-10 |
| rs713586   | <i>RBJ</i>      | Adult BMI                  | Speliotes et al. Nat Genet 2010 | c            | t      | 1.13      | 3.62E-07 | 1.11            | 0.001    | 1.09            | 1.84E-06 | 1.07            | 1.68E-09  | 1.05       | 4.65E-10 |
| rs7359397  | <i>SH2B1</i>    | Adult BMI                  | Speliotes et al. Nat Genet 2010 | t            | c      | 1.11      | 4.17E-07 | 1.08            | 0.006    | 1.08            | 3.88E-07 | 1.06            | 5.57E-11  | 1.05       | 1.01E-10 |
| rs12444979 | <i>GPRC5B</i>   | Adult BMI                  | Speliotes et al. Nat Genet 2010 | c            | t      | 1.19      | 1.95E-06 | 1.19            | 0.0015   | 1.16            | 1.66E-09 | 1.09            | 2.89E-09  | 1.07       | 4.50E-11 |
| rs2241423  | <i>MAP2K5</i>   | Adult BMI                  | Speliotes et al. Nat Genet 2010 | g            | a      | 1.13      | 1.07E-05 | 1.15            | 0.0004   | 1.13            | 6.71E-10 | 1.09            | 5.08E-15  | 1.06       | 1.42E-13 |
| rs10968576 | <i>LRRN6C</i>   | Adult BMI                  | Speliotes et al. Nat Genet 2010 | g            | a      | 1.11      | 1.22E-05 | 1.12            | 0.001    | 1.10            | 2.89E-07 | 1.07            | 3.34E-08  | 1.04       | 1.39E-06 |
| rs1514175  | <i>TNNI3K</i>   | Adult BMI                  | Speliotes et al. Nat Genet 2010 | a            | g      | 1.11      | 1.49E-05 | 1.06            | 0.07     | 1.05            | 0.01     | 1.05            | 5.86E-06  | 1.04       | 1.34E-06 |
| rs4929949  | <i>RPL27A</i>   | Adult BMI                  | Speliotes et al. Nat Genet 2010 | c            | t      | 1.09      | 1.52E-05 | 1.09            | 0.005    | 1.07            | 1.80E-05 | 1.05            | 1.33E-07  | 1.03       | 4.16E-05 |
| rs1555543  | <i>PTBP2</i>    | Adult BMI                  | Speliotes et al. Nat Genet 2010 | c            | a      | 1.11      | 2.83E-05 | 1.08            | 0.02     | 1.04            | 0.02     | 1.05            | 1.85E-05  | 1.03       | 0.0001   |
| rs2890652  | <i>LRP1B</i>    | Adult BMI                  | Speliotes et al. Nat Genet 2010 | c            | t      | 1.15      | 0.0001   | 1.17            | 0.002    | 1.07            | 0.004    | 1.07            | 7.07E-06  | 1.04       | 0.0003   |
| rs29941    | <i>KCTD15</i>   | Adult BMI                  | Speliotes et al. Nat Genet 2010 | g            | a      | 1.09      | 0.0001   | 1.10            | 0.002    | 1.09            | 6.47E-07 | 1.05            | 1.75E-07  | 1.03       | 2.97E-05 |
| rs2112347  | <i>FLJ35779</i> | Adult BMI                  | Speliotes et al. Nat Genet 2010 | t            | g      | 1.08      | 0.0002   | 1.11            | 0.0004   | 1.09            | 3.95E-09 | 1.07            | 2.88E-13  | 1.04       | 1.25E-08 |
| rs887912   | <i>FANCL</i>    | Adult BMI                  | Speliotes et al. Nat Genet 2010 | t            | c      | 1.09      | 0.0002   | 1.13            | 0.0003   | 1.10            | 6.46E-09 | 1.07            | 1.22E-10  | 1.04       | 2.39E-08 |
| rs13078807 | <i>CADM2</i>    | Adult BMI                  | Speliotes et al. Nat Genet 2010 | g            | a      | 1.10      | 0.0005   | 1.08            | 0.07     | 1.10            | 5.24E-07 | 1.06            | 1.10E-07  | 1.06       | 3.47E-11 |
| rs206936   | <i>NUDT3</i>    | Adult BMI                  | Speliotes et al. Nat Genet 2010 | g            | a      | 1.10      | 0.0006   | 1.09            | 0.03     | 1.04            | 0.03     | 1.04            | 0.0005    | 1.03       | 0.0004   |
| rs7227255  | <i>MC4R</i>     | Adult BMI                  | Speliotes et al. Nat Genet 2010 | g            | a      | 1.48      | 0.007    | 1.10            | 0.62     | 1.64            | 2.87E-06 | 1.30            | 8.37E-07  | 1.16       | 3.80E-07 |
| rs4836133  | <i>ZNF608</i>   | Adult BMI                  | Speliotes et al. Nat Genet 2010 | a            | c      | 1.07      | 0.004    | 1.06            | 0.14     | 1.05            | 0.02     | 1.05            | 4.59E-05  | 1.04       | 6.26E-05 |
| rs10150332 | <i>NRXN3</i>    | Adult BMI                  | Speliotes et al. Nat Genet 2010 | c            | t      | 1.09      | 0.004    | 1.12            | 0.007    | 1.10            | 1.70E-05 | 1.08            | 3.15E-08  | 1.04       | 2.10E-05 |
| rs4771122  | <i>MTIF3</i>    | Adult BMI                  | Speliotes et al. Nat Genet 2010 | g            | a      | 1.07      | 0.03     | 1.10            | 0.02     | 1.09            | 3.43E-05 | 1.06            | 5.83E-06  | 1.04       | 5.48E-05 |
| rs13107325 | <i>SLC39A8</i>  | Adult BMI                  | Speliotes et al. Nat Genet 2010 | t            | c      | 1.17      | 0.05     | 1.29            | 0.005    | 1.22            | 2.42E-05 | 1.12            | 1.65E-06  | 1.09       | 6.28E-07 |
| rs11847697 | <i>PRKD1</i>    | Adult BMI                  | Speliotes et al. Nat Genet 2010 | t            | c      | 1.15      | 0.16     | 1.01            | 0.94     | 1.22            | 0.002    | 1.15            | 8.76E-06  | 1.09       | 1.46E-05 |

**Supplementary Table 10. Association results for all novel genome-wide significant ( $P < 5 \times 10^{-8}$ ) obesity-related SNPs in studies of extremely obese with different ascertainment strategies**

| SNP        | Chr | Position  | Gene            | Trait increasing allele | Other allele | Extremely obese studies (case-control) |              |      |          | Extremely obese studies (case-control and family-based) |              |                  |          | Trait           |
|------------|-----|-----------|-----------------|-------------------------|--------------|----------------------------------------|--------------|------|----------|---------------------------------------------------------|--------------|------------------|----------|-----------------|
|            |     |           |                 |                         |              | No. cases                              | No. controls | OR   | P        | No. cases                                               | No. controls | Effect direction | P        |                 |
| rs7989336  | 13  | 95815549  | <i>HS6ST3</i>   | a                       | g            | 6088                                   | 6279         | 1.10 | 3.79E-04 | 6787                                                    | 6979         | +                | 0.005    | Obesity class 2 |
| rs17381664 | 1   | 77820919  | <i>ZZZ3</i>     | c                       | t            | 6084                                   | 6257         | 1.01 | 0.64     | 6682                                                    | 6852         | +                | 0.23     | Obesity class 2 |
| rs17024258 | 1   | 109948844 | <i>GNAT2</i>    | t                       | c            | 6103                                   | 6299         | 1.06 | 0.44     | 6795                                                    | 6997         | +                | 0.25     | Obesity class 1 |
| rs4735692  | 8   | 76778218  | <i>HNF4G</i>    | a                       | g            | 6101                                   | 6291         | 1.07 | 0.01     | 6745                                                    | 6929         | +                | 0.006    | Obesity class 1 |
| rs13041126 | 20  | 50526403  | <i>MRPS33P4</i> | t                       | c            | 6124                                   | 6314         | 1.06 | 0.05     | 6829                                                    | 7019         | +                | 0.02     | Obesity class 1 |
| rs2531995  | 16  | 3953468   | <i>ADCY9</i>    | t                       | c            | 6130                                   | 6310         | 1.10 | 8.06E-04 | 6825                                                    | 7006         | +                | 6.28E-04 | Obesity class 1 |
| rs4735692  | 8   | 76778218  | <i>HNF4G</i>    | a                       | g            | 6101                                   | 6291         | 1.07 | 0.01     | 6745                                                    | 6929         | +                | 0.006    | Overweight      |
| rs7503807  | 17  | 76205706  | <i>RPTOR</i>    | a                       | c            | 6137                                   | 6318         | 1.09 | 0.002    | 6842                                                    | 7022         | +                | 0.001    | Overweight      |

**Supplementary Table 11. Association results for BMI tails and clinical classes of obesity for published loci for extreme childhood and adult obesity**

| SNP        | Gene           | Published associated trait                          | Reference                             | Effect | Other  | BMI tails |          | Obesity Class 3 |          | Obesity Class 2 |          | Obesity Class 1 |           | Overweight |          |
|------------|----------------|-----------------------------------------------------|---------------------------------------|--------|--------|-----------|----------|-----------------|----------|-----------------|----------|-----------------|-----------|------------|----------|
|            |                |                                                     |                                       | allele | allele | OR        | P        | OR              | P        | OR              | P        | OR              | P         | OR         | P        |
| rs1421085  | <i>FTO</i>     | extreme childhood obesity,<br>extreme adult obesity | Dina et al. Nat Genet 2007            | c      | t      | 1.35      | 6.48E-52 | 1.45            | 6.25E-39 | 1.34            | 2.06E-83 | 1.24            | 6.65E-113 | 1.14       | 5.50E-82 |
| rs17782313 | <i>MC4R</i>    | extreme childhood obesity,<br>extreme adult obesity | Loos et al., Nat Genet 2008           | c      | t      | 1.20      | 4.67E-13 | 1.20            | 2.18E-06 | 1.19            | 1.56E-20 | 1.15            | 3.24E-32  | 1.11       | 9.12E-34 |
| rs6235     | <i>PCSK1</i>   | extreme childhood obesity,<br>extreme adult obesity | Benzinou et al., Nat Genet 2008       | c      | g      | 1.05      | 0.06     | 1.12            | 0.002    | 1.08            | 1.84E-04 | 1.05            | 2.52E-04  | 1.03       | 3.76E-04 |
| rs6232     | <i>PCSK1</i>   | extreme childhood obesity,<br>extreme adult obesity | Benzinou et al., Nat Genet 2008       | c      | t      | 0.998     | 0.98     | 1.13            | 0.18     | 1.10            | 0.06     | 1.06            | 0.05      | 1.04       | 0.07     |
| rs1424233  | <i>MAF</i>     | extreme childhood obesity,<br>extreme adult obesity | Meyre et al., Nat Genet 2009          | t      | c      | 0.996     | 0.86     | 1.01            | 0.85     | 0.996           | 0.81     | 1.01            | 0.25      | 1.02       | 0.06     |
| rs1805081  | <i>NPC1</i>    | extreme childhood obesity,<br>extreme adult obesity | Meyre et al., Nat Genet 2009          | t      | c      | 1.07      | 6.48E-04 | 1.07            | 0.02     | 1.05            | 0.004    | 1.04            | 8.05E-05  | 1.02       | 0.002    |
| rs10508503 | <i>PTER</i>    | extreme childhood obesity,<br>extreme adult obesity | Meyre et al., Nat Genet 2009          | c      | t      | 1.04      | 0.52     | 1.02            | 0.74     | 1.03            | 0.36     | 1.04            | 0.04      | 1.02       | 0.13     |
| rs12145833 | <i>SDCCAG8</i> | childhood extreme obesity                           | Scherag et al. PLOS Genet 2010        | t      | g      | 1.03      | 0.48     | 1.04            | 0.42     | 1.06            | 0.02     | 1.03            | 0.09      | 1.03       | 0.01     |
| rs17150703 | <i>TNKS</i>    | childhood extreme obesity                           | Scherag et al. PLOS Genet 2010        | a      | g      | 1.11      | 0.04     | 1.09            | 0.18     | 1.07            | 0.04     | 1.03            | 0.11      | 1.02       | 0.16     |
| rs6548238  | <i>TMEM18</i>  | childhood extreme obesity                           | Scherag et al. PLOS Genet 2010        | c      | t      | 1.27      | 1.10E-13 | 1.26            | 2.09E-06 | 1.26            | 7.39E-25 | 1.18            | 4.29E-36  | 1.12       | 1.38E-32 |
| rs7132908  | <i>FAIM2</i>   | Severe young adulthood obesity                      | Paternoster et al., PLOS One 2011     | a      | g      | 1.15      | 9.23E-07 | 1.19            | 5.54E-06 | 1.13            | 1.49E-08 | 1.11            | 5.62E-15  | 1.06       | 4.04E-09 |
| rs2116830  | <i>KCNMA1</i>  | extreme adult obesity                               | Jiao et al. BMC Medical Genomics 2011 | g      | t      | 1.03      | 0.40     | 1.03            | 0.63     | 1.02            | 0.53     | 1.01            | 0.43      | 1.01       | 0.38     |
| rs9299     | <i>HOXB5</i>   | childhood obesity                                   | Bradfield et al. Nat Genet 2012       | t      | c      | 1.05      | 0.049    | 1.01            | 0.85     | 1.02            | 0.32     | 1.04            | 0.004     | 1.02       | 0.02     |
| rs9568856  | <i>OLFM4</i>   | childhood obesity                                   | Bradfield et al. Nat Genet 2012       | a      | g      | 1.14      | 0.0035   | 1.08            | 0.19     | 1.12            | 1.53E-04 | 1.06            | 0.002     | 1.04       | 8.93E-04 |

**Supplementary Table 12. Differences between the effect sizes observed in the tails for BMI and those expected based on the overall distribution**

| SNP                                                                   | Gene            | Effective N | Beta difference <sup>a</sup> | Standard error difference | P-value for difference |
|-----------------------------------------------------------------------|-----------------|-------------|------------------------------|---------------------------|------------------------|
| <b>Previously published SNPs associated with BMI in GIANT</b>         |                 |             |                              |                           |                        |
| rs1558902                                                             | <i>FTO</i>      | 5446        | 0.059                        | 0.024                     | 0.015                  |
| rs2815752                                                             | <i>NEGR1</i>    | 5421        | -0.059                       | 0.025                     | 0.016                  |
| rs10938397                                                            | <i>GNPDA2</i>   | 5538        | -0.058                       | 0.025                     | 0.018                  |
| rs10767664                                                            | <i>BDNF</i>     | 4344        | -0.078                       | 0.033                     | 0.019                  |
| rs2112347                                                             | <i>FLJ35779</i> | 5446        | 0.054                        | 0.025                     | 0.029                  |
| rs4771122                                                             | <i>MTIF3</i>    | 4444        | -0.064                       | 0.031                     | 0.041                  |
| rs13078807                                                            | <i>CADM2</i>    | 4184        | -0.062                       | 0.033                     | 0.062                  |
| rs887912                                                              | <i>FANCL</i>    | 4974        | 0.048                        | 0.027                     | 0.080                  |
| rs3817334                                                             | <i>MTCH2</i>    | 5445        | -0.036                       | 0.024                     | 0.135                  |
| rs12444979                                                            | <i>GPRC5B</i>   | 3547        | 0.063                        | 0.044                     | 0.151                  |
| rs571312                                                              | <i>MC4R</i>     | 4205        | 0.044                        | 0.031                     | 0.162                  |
| rs4929949                                                             | <i>RPL27A</i>   | 5612        | 0.027                        | 0.024                     | 0.253                  |
| rs2241423                                                             | <i>MAP2K5</i>   | 4483        | -0.029                       | 0.032                     | 0.355                  |
| rs2287019                                                             | <i>QPCTL</i>    | 3600        | -0.035                       | 0.039                     | 0.368                  |
| rs29941                                                               | <i>KCTD15</i>   | 5134        | -0.023                       | 0.026                     | 0.382                  |
| rs4836133                                                             | <i>ZNF608</i>   | 5610        | -0.021                       | 0.024                     | 0.387                  |
| rs13107325                                                            | <i>SLC39A8</i>  | 2320        | -0.074                       | 0.093                     | 0.428                  |
| rs11847697                                                            | <i>PRKD1</i>    | 1771        | 0.075                        | 0.103                     | 0.467                  |
| rs9816226                                                             | <i>ETV5</i>     | 4198        | -0.024                       | 0.035                     | 0.494                  |
| rs10150332                                                            | <i>NRXN3</i>    | 4341        | -0.022                       | 0.032                     | 0.504                  |
| rs1514175                                                             | <i>TNNI3K</i>   | 5520        | 0.013                        | 0.024                     | 0.573                  |
| rs543874                                                              | <i>SEC16B</i>   | 4190        | 0.019                        | 0.034                     | 0.580                  |
| rs3810291                                                             | <i>TMEM160</i>  | 4930        | -0.012                       | 0.028                     | 0.669                  |
| rs1555543                                                             | <i>PTBP2</i>    | 5440        | 0.010                        | 0.024                     | 0.675                  |
| rs7359397                                                             | <i>SH2B1</i>    | 5498        | -0.010                       | 0.024                     | 0.692                  |
| rs206936                                                              | <i>NUDT3</i>    | 4217        | 0.008                        | 0.034                     | 0.803                  |
| rs7138803                                                             | <i>FAIM</i>     | 5392        | 0.005                        | 0.025                     | 0.826                  |
| rs2867125                                                             | <i>TMEM18</i>   | 4078        | -0.006                       | 0.037                     | 0.862                  |
| rs10968576                                                            | <i>LRRN6C</i>   | 5217        | -0.003                       | 0.026                     | 0.901                  |
| rs987237                                                              | <i>TFAP2B</i>   | 4141        | -0.003                       | 0.035                     | 0.935                  |
| rs713586                                                              | <i>RBJ</i>      | 5517        | 0.002                        | 0.024                     | 0.937                  |
| rs2890652                                                             | <i>LRP1B</i>    | 3872        | -0.003                       | 0.037                     | 0.942                  |
| <b>Previously published SNPs for association with extreme obesity</b> |                 |             |                              |                           |                        |
| rs1421085                                                             | <i>FTO</i>      | 5445        | -0.057                       | 0.024                     | 0.018                  |
| rs17782313                                                            | <i>MC4R</i>     | 4294        | -0.041                       | 0.031                     | 0.190                  |
| rs6235                                                                | <i>PCSK1</i>    | 4859        | -0.032                       | 0.028                     | 0.257                  |
| rs1424233                                                             | <i>MAF</i>      | 5521        | 0.024                        | 0.023                     | 0.296                  |
| rs1805081                                                             | <i>NPC1</i>     | 5539        | 0.022                        | 0.024                     | 0.356                  |
| rs12145833                                                            | <i>SDCCAG8</i>  | 3939        | 0.033                        | 0.037                     | 0.373                  |
| rs9568856                                                             | <i>OLFM4</i>    | 3644        | 0.034                        | 0.044                     | 0.443                  |
| rs2116830                                                             | <i>KCNMA1</i>   | 4296        | -0.026                       | 0.036                     | 0.464                  |
| rs6548238                                                             | <i>TMEM18</i>   | 4006        | -0.007                       | 0.038                     | 0.859                  |
| rs9299                                                                | <i>HOXB5</i>    | 5178        | -0.004                       | 0.026                     | 0.880                  |
| rs7132908                                                             | <i>FAIM2</i>    | 3097        | -0.001                       | 0.033                     | 0.983                  |



|                                                                                                |                 |      |        |       |       |
|------------------------------------------------------------------------------------------------|-----------------|------|--------|-------|-------|
| rs17150703                                                                                     | <i>TNKS</i>     | 3098 | 0.000  | 0.051 | 0.997 |
| <b>Novel genome-wide significant SNPs for the tails of BMI and clinical classes of obesity</b> |                 |      |        |       |       |
| rs7503807                                                                                      | <i>RPTOR</i>    | 5400 | -0.049 | 0.024 | 0.040 |
| rs2531995                                                                                      | <i>ADCY9</i>    | 5446 | 0.030  | 0.026 | 0.251 |
| rs7989336                                                                                      | <i>HS6ST3</i>   | 5453 | -0.024 | 0.024 | 0.309 |
| rs17381664                                                                                     | <i>ZZZ3</i>     | 5378 | 0.018  | 0.025 | 0.477 |
| rs4735692                                                                                      | <i>HNF4G</i>    | 5475 | 0.015  | 0.024 | 0.541 |
| rs13041126                                                                                     | <i>MRPS33P4</i> | 4768 | -0.005 | 0.028 | 0.872 |

<sup>a</sup>The beta represents the difference in standardized effects.

**Supplementary Table 13. Summary of the studies in the polygene/variance explained analyses**

| <b>Study</b>                | <b>No. of cases/<br/>No. of controls<br/>(extreme BMI)</b> | <b>No. subjects for<br/>BMI (continuous)*</b> | <b>Covariates</b> | <b>Outcome definition</b>                                                                                                      |
|-----------------------------|------------------------------------------------------------|-----------------------------------------------|-------------------|--------------------------------------------------------------------------------------------------------------------------------|
| <b>TwinGene</b>             | 328/328                                                    | 6559                                          | age,sex,3 PCA     | Cases: upper 5% of BMI distribution; Controls: lower 5% of BMI distribution                                                    |
| <b>LifeLines</b>            | 405/408                                                    | 8116                                          | age,sex,10<br>PCA | Cases: upper 5% of BMI distribution; Controls: lower 5% of BMI distribution                                                    |
| <b>French Obesity Study</b> | 1313/1339                                                  | N.A.                                          | age,sex           | Cases: obese children and class III obese adults; Controls: lean adults and children                                           |
| <b>Essen Obesity Study</b>  | 453/435                                                    | N.A.                                          | sex               | Cases: extremely obese children and adolescents; Controls: healthy lean individuals                                            |
| <b>GOYA</b>                 | 2633/2740                                                  | N.A.                                          | age,sex           | Case: extremely obese men (>99th percentile) and women (>96% percentile); Controls: randomly selected from the same population |
| <b>GEO</b>                  | 1717/1792                                                  | N.A.                                          | age,sex, 6 PCA    | Cases: BMI>40; Controls: BMI<25                                                                                                |

\*Some studies did not contribute to the overall analysis as indicated by N.A.

**Supplementary Table 14. Variance explained and AUC improvement in six studies of extreme BMI traits**

|                                                      | Twingene | LifeLines | GEO   | GOYA  | Essen Obesity Study | French Obesity Study | Meta-analysis |
|------------------------------------------------------|----------|-----------|-------|-------|---------------------|----------------------|---------------|
| <b>Variance explained<sup>a</sup></b>                |          |           |       |       |                     |                      |               |
| <b>GIANT-extreme</b>                                 | 7.99%    | 1.3%      | 2.2%  | 4.0%  | 7.2%                | 7.1%                 | 4.13%         |
| <b>GIANT-bmi</b>                                     | 10.52%   | 4.6%      | 3.2%  | 4.7%  | 12.9%               | 8.2%                 | 5.50%         |
| <b>GIANT-extreme polygene<sup>b</sup></b>            | 8.21%    | 10.3%     | 2.8%  | 4.1%  | 8.0%                | 7.6%                 | 6.40%         |
| <b>GIANT-bmi polygene<sup>b</sup></b>                | 21.36%   | 16.6%     | 8.1%  | 9.0%  | 17.9%               | 17.4%                | 15.30%        |
| <b>AUC improvement<sup>c</sup></b>                   |          |           |       |       |                     |                      |               |
| <b>GIANT-extreme polygene<sup>b</sup></b>            | 0.082    | 0.065     | 0.013 | 0.071 | 0.127               | 0.079                | 0.071         |
| <b>GIANT-bmi polygene<sup>b</sup></b>                | 0.162    | 0.096     | 0.034 | 0.118 | 0.218               | 0.148                | 0.129         |
| <b>N. SNPs (GIANT-extreme)</b>                       | 10/10    | 10/10     | 9/10  | 10/10 | 8/10                | 10/10                | 10            |
| <b>N. SNPs (GIANT-bmi)</b>                           | 32/32    | 30/32     | 29/32 | 32/32 | 26/32               | 30/32                | 30            |
| <b>N. SNPs (GIANT-extremes polygene)<sup>b</sup></b> | 16939    | 17595     | 14634 | 16750 | 8120                | 16002                | 15475         |
| <b>N. SNPs (GIANT-bmi polygene)<sup>b</sup></b>      | 24970    | 22527     | 22294 | 24792 | 9144                | 23882                | 22800         |
| <b>R<sup>2</sup> for base model</b>                  | 0.030    | 0.110     | 0.472 | 0.004 | 0.001               | 0.025                | 0.171         |
| <b>AUC for base model</b>                            | 0.581    | 0.667     | 0.849 | 0.531 | 0.515               | 0.581                | 0.654         |

<sup>a</sup> Variance explained is calculated as the improvement in Nagelkerke R<sup>2</sup> over a base model.

<sup>b</sup> Including all the SNPs with P-value lower than 0.05 in GIANT-extremes or GIANT-bmi

<sup>c</sup> AUC improvement is calculated over a base model.

Supplementary Table 15. Secondary signals that reached genome-wide significance ( $P < 5 \times 10^{-8}$ )

| SNP                    | Chr | Position  | Gene            | Effect allele | Other allele | Effect allele freq | No. cases | No. controls | OR <sup>a</sup> | P <sup>a</sup> | Peak SNP <sup>b</sup> | r <sup>2c</sup> | Conditional OR <sup>d</sup> | Conditional P <sup>d</sup> |
|------------------------|-----|-----------|-----------------|---------------|--------------|--------------------|-----------|--------------|-----------------|----------------|-----------------------|-----------------|-----------------------------|----------------------------|
| <b>BMI tails</b>       |     |           |                 |               |              |                    |           |              |                 |                |                       |                 |                             |                            |
| rs2058908              | 16  | 52363646  | <i>FTO</i>      | c             | t            | 0.7234             | 10361.7   | 10494.4      | 1.37            | 2.253E-31      | rs8043757             | 0.184           | 1.19                        | 2.750E-09                  |
| <b>Height tails</b>    |     |           |                 |               |              |                    |           |              |                 |                |                       |                 |                             |                            |
| rs10990303             | 9   | 97450226  | <i>PTCH1</i>    | t             | c            | 0.2297             | 9993.87   | 9932.94      | 1.20            | 1.421E-11      | rs1885427             | 0.001           | 1.20                        | 6.608E-12                  |
| rs572169               | 3   | 173648421 | <i>GHSR</i>     | t             | c            | 0.3155             | 12254.8   | 12202.9      | 1.17            | 1.109E-12      | rs12493901            | 0.006           | 1.15                        | 3.541E-11                  |
| rs2295887              | 20  | 33177848  | <i>EDEM2</i>    | g             | a            | 0.3874             | 11407     | 11372        | 1.16            | 8.602E-13      | rs224333              | 0.025           | 1.15                        | 4.511E-11                  |
| rs2814993              | 6   | 34726871  | <i>C6orf106</i> | a             | g            | 0.1525             | 8343      | 8289         | 1.29            | 4.942E-14      | rs1759645             | 0.016           | 1.25                        | 8.623E-11                  |
| rs12817549             | 12  | 92645445  | <i>CRADD</i>    | t             | c            | 0.5628             | 11776     | 11745        | 1.11            | 4.228E-09      | rs11107116            | 0               | 1.12                        | 1.531E-10                  |
| rs1432559              | 2   | 56043122  | <i>EFEMP1</i>   | g             | t            | 0.1969             | 10246     | 10199.1      | 1.21            | 8.932E-12      | rs3791679             | 0.008           | 1.19                        | 2.824E-10                  |
| rs17720281             | 4   | 145763226 | <i>HHIP</i>     | t             | c            | 0.4207             | 12747     | 12728        | 1.21            | 4.912E-20      | rs1812175             | 0.114           | 1.15                        | 4.468E-10                  |
| rs1368380              | 5   | 171218237 | <i>FBXW11</i>   | t             | c            | 0.4349             | 7894      | 7910         | 1.15            | 1.209E-08      | rs153750              | 0.017           | 1.16                        | 3.285E-09                  |
| rs7731703              | 5   | 32730699  | <i>NPR3</i>     | c             | t            | 0.6712             | 11184.2   | 11157.1      | 1.16            | 2.473E-10      | rs13154066            | 0               | 1.15                        | 3.783E-09                  |
| rs6750795              | 2   | 232086475 | <i>C2orf52</i>  | t             | c            | 0.4427             | 12852.7   | 12830.8      | 1.12            | 1.728E-08      | rs6437061             | 0.002           | 1.12                        | 1.081E-08                  |
| rs648831               | 6   | 81012927  | <i>BCKDHB</i>   | t             | c            | 0.5067             | 11861     | 11813        | 1.13            | 1.363E-09      | rs310405              | 0.005           | 1.12                        | 1.330E-08                  |
| rs10512248             | 9   | 97299524  | <i>PTCH1</i>    | g             | t            | 0.3462             | 11589.6   | 11562.8      | 1.13            | 6.171E-09      | rs1885427             | 0.002           | 1.13                        | 1.861E-08                  |
| rs1866146              | 2   | 25234077  | <i>EFR3B</i>    | g             | a            | 0.3504             | 9377      | 9394         | 1.19            | 4.32E-13       | rs11895026            | 0.187           | 1.15                        | 2.011E-08                  |
| <b>WHR tails</b>       |     |           |                 |               |              |                    |           |              |                 |                |                       |                 |                             |                            |
| rs2745359              | 6   | 127423649 | <i>RSPO3</i>    | c             | t            | 0.0704             | 2544.9    | 2542.9       | 1.82            | 1.321E-09      | rs7745274             | 0.023           | 1.74                        | 3.128E-08                  |
| <b>Obesity class 1</b> |     |           |                 |               |              |                    |           |              |                 |                |                       |                 |                             |                            |
| rs929641               | 2   | 58645881  | <i>FANCL</i>    | a             | g            | 0.5876             | 51698     | 94588.9      | 1.06            | 6.581E-09      | rs887912              | 0               | 1.06                        | 5.780E-09                  |
| <b>Overweight</b>      |     |           |                 |               |              |                    |           |              |                 |                |                       |                 |                             |                            |
| rs9675886              | 18  | 56120302  | <i>MC4R</i>     | g             | a            | 0.2832             | 143868    | 94079        | 1.07            | 1.088E-19      | rs538656              | 0.099           | 1.05                        | 1.169E-08                  |
| rs887912               | 2   | 59156381  | <i>FANCL</i>    | t             | c            | 0.2813             | 154367    | 102137       | 1.04            | 2.39E-08       | rs6731302             | 0.007           | 1.04                        | 3.18E-08                   |

<sup>a</sup>OR and P for the secondary signal from the unconditional meta-analysis

<sup>b</sup>Most significant SNP in the region conditioned on.

<sup>c</sup>R<sup>2</sup> between the secondary signal and peak SNP in the region

<sup>d</sup>OR and P for the secondary signal from the approximate conditional and joint analysis

**Supplementary Table 16. Study-specific haplotype results for the regions that exceeded a prior odds of 1 in 30,000**

| Study                                                          | Sex    | No. of SNPs | No. of subjects upper 5% tails | No. of subjects lower 5% tails | Bayes' factor | Log10 Bayes' factor |
|----------------------------------------------------------------|--------|-------------|--------------------------------|--------------------------------|---------------|---------------------|
| <b>Results for <i>ID4</i>. Chr6:19,909,472-19,989,472</b>      |        |             |                                |                                |               |                     |
| ARIC                                                           | Male   | 41          | 192                            | 192                            | 1.47          | 0.17                |
| ARIC                                                           | Female | 41          | 214                            | 214                            | 7.85          | 0.89                |
| COLAUS                                                         | Male   | 18          | 143                            | 143                            | 8.66          | 0.94                |
| COLAUS                                                         | Female | 18          | 127                            | 127                            | 1.81          | 0.26                |
| LIFELINES                                                      | Male   | 17          | 175                            | 175                            | 3.73          | 0.57                |
| LIFELINES                                                      | Female | 17          | 233                            | 233                            | 1.69          | 0.23                |
| NFBC                                                           | Male   | 21          | 56                             | 56                             | 0.88          | -0.05               |
| NFBC                                                           | Female | 21          | 58                             | 58                             | 0.55          | -0.26               |
| PLCO                                                           | Male   | 28          | 113                            | 113                            | 1.06          | 0.03                |
| QIMR                                                           | Male   | 20          | 83                             | 83                             | 1.79          | 0.25                |
| QIMR                                                           | Female | 20          | 117                            | 117                            | 0.90          | -0.05               |
| RS1                                                            | Male   | 31          | 118                            | 119                            | 0.83          | -0.08               |
| RS1                                                            | Female | 31          | 162                            | 159                            | 0.71          | -0.15               |
| SHIP                                                           | Male   | 44          | 100                            | 100                            | 44.53         | 1.65                |
| SHIP                                                           | Female | 44          | 102                            | 102                            | 1.75          | 0.24                |
| TWINGENE                                                       | Male   | 38          | 172                            | 173                            | 0.23          | -0.64               |
| TWINGENE                                                       | Female | 38          | 159                            | 160                            | 3.69          | 0.57                |
| WGHS                                                           | Female | 10          | 1155                           | 1155                           | 3.25          | 0.51                |
| <b>Total</b>                                                   |        |             | <b>3479</b>                    | <b>3479</b>                    | <b>118839</b> | <b>5.07</b>         |
| <b>Results for <i>LIN28B</i>. Chr6:105,445,647-105,525,647</b> |        |             |                                |                                |               |                     |
| ARIC                                                           | Male   | 11          | 192                            | 192                            | 1.01          | 0.01                |
| ARIC                                                           | Female | 11          | 214                            | 214                            | 10.83         | 1.03                |
| COLAUS                                                         | Male   | 3           | 143                            | 143                            | 1.01          | 0.00                |
| COLAUS                                                         | Female | 3           | 127                            | 127                            | 0.55          | -0.26               |
| LIFELINES                                                      | Male   | 3           | 175                            | 175                            | 0.65          | -0.18               |
| LIFELINES                                                      | Female | 3           | 233                            | 233                            | 1.14          | 0.06                |
| NFBC                                                           | Male   | 8           | 56                             | 56                             | 0.97          | -0.01               |
| NFBC                                                           | Female | 8           | 58                             | 58                             | 58.30         | 1.77                |
| PLCO                                                           | Male   | 12          | 113                            | 113                            | 1.40          | 0.15                |
| QIMR                                                           | Male   | 6           | 83                             | 83                             | 108.85        | 2.04                |
| QIMR                                                           | Female | 6           | 117                            | 117                            | 1.37          | 0.14                |
| RS1                                                            | Male   | 13          | 118                            | 119                            | 1.33          | 0.13                |
| RS1                                                            | Female | 13          | 162                            | 159                            | 0.19          | -0.73               |
| SHIP                                                           | Male   | 12          | 100                            | 100                            | 0.56          | -0.26               |
| SHIP                                                           | Female | 12          | 102                            | 102                            | 0.58          | -0.24               |
| TWINGENE                                                       | Male   | 11          | 172                            | 173                            | 19.14         | 1.28                |
| TWINGENE                                                       | Female | 11          | 159                            | 160                            | 0.50          | -0.30               |
| WGHS                                                           | Female | 3           | 1155                           | 1155                           | 2.54          | 0.41                |
| <b>Total</b>                                                   |        |             | <b>3479</b>                    | <b>3479</b>                    | <b>105478</b> | <b>5.02</b>         |
| <b>Results for <i>DLEU7</i>. Chr13:9,963,335-50,043,335</b>    |        |             |                                |                                |               |                     |
| ARIC                                                           | Male   | 25          | 192                            | 192                            | 0.99          | 0.00                |
| ARIC                                                           | Female | 25          | 214                            | 214                            | 0.59          | -0.23               |
| COLAUS                                                         | Male   | 15          | 143                            | 143                            | 0.61          | -0.21               |
| COLAUS                                                         | Female | 15          | 127                            | 127                            | 0.73          | -0.14               |
| LIFELINES                                                      | Male   | 12          | 175                            | 175                            | 0.51          | -0.29               |
| LIFELINES                                                      | Female | 12          | 233                            | 233                            | 1.87          | 0.27                |
| NFBC                                                           | Male   | 16          | 56                             | 56                             | 0.91          | -0.04               |
| NFBC                                                           | Female | 16          | 58                             | 58                             | 14.47         | 1.16                |
| PLCO                                                           | Male   | 32          | 113                            | 113                            | 1.74          | 0.24                |
| QIMR                                                           | Male   | 15          | 83                             | 83                             | 1.56          | 0.19                |
| QIMR                                                           | Female | 15          | 117                            | 117                            | 12.95         | 1.11                |
| RS1                                                            | Male   | 34          | 118                            | 119                            | 1.36          | 0.13                |

**Supplementary Table 16. Study-specific haplotype results for the regions that exceeded a prior odds of 1 in 30,000**

| <b>Study</b> | <b>Sex</b> | <b>No. of SNPs</b> | <b>No. of subjects upper 5% tails</b> | <b>No. of subjects lower 5% tails</b> | <b>Bayes' factor</b> | <b>Log10 Bayes' factor</b> |
|--------------|------------|--------------------|---------------------------------------|---------------------------------------|----------------------|----------------------------|
| RS1          | Female     | 34                 | 162                                   | 159                                   | 2.90                 | 0.46                       |
| SHIP         | Male       | 28                 | 100                                   | 100                                   | 9.13                 | 0.96                       |
| SHIP         | Female     | 28                 | 102                                   | 102                                   | 1.10                 | 0.04                       |
| TWINGENE     | Male       | 23                 | 172                                   | 173                                   | 1.29                 | 0.11                       |
| TWINGENE     | Female     | 23                 | 159                                   | 160                                   | 1.06                 | 0.03                       |
| WGHS         | Female     | 10                 | 1155                                  | 1155                                  | 10.73                | 1.03                       |
| <b>Total</b> |            |                    | <b>3479</b>                           | <b>3479</b>                           | <b>66599</b>         | <b>4.82</b>                |

Supplementary Table 17. SNPs identified in other GWAS near novel loci

| Lead SNP  | GWAS SNP within 1Mb from lead SNP | Distance from lead SNP (bases) | R <sup>2</sup> with lead SNP | Information from GWAS catalog |                                                                                                                             |                                                |                                                 | Same Gene reported for the lead SNP? | PMID     |
|-----------|-----------------------------------|--------------------------------|------------------------------|-------------------------------|-----------------------------------------------------------------------------------------------------------------------------|------------------------------------------------|-------------------------------------------------|--------------------------------------|----------|
|           |                                   |                                |                              | First author                  | Study                                                                                                                       | Disease Trait                                  | Reported Gene                                   |                                      |          |
| rs9568867 | rs10507577                        | 139261                         | 0.01                         | Benjamin EJ                   | Genome-wide association with select biomarker traits in the Framingham Heart Study.                                         | Select biomarker traits                        | Intergenic                                      |                                      | 17903293 |
| rs9568867 | rs9536591                         | 473735                         | 0.00                         | Matarin M                     | A genome-wide genotyping study in patients with ischaemic stroke: initial analysis and data release.                        | Stroke                                         | Intergenic                                      |                                      | 17434096 |
| rs7989336 | rs2038823                         | 66115                          | 0.24                         | Huang YC                      | Genome-wide association study of diabetic retinopathy in a Taiwanese population.                                            | Diabetic retinopathy                           | <i>HS6ST3</i>                                   | Yes                                  | 21310492 |
| rs7989336 | rs9556711                         | 998868                         | 0.00                         | Heath AC                      | A quantitative-trait genome-wide association study of alcoholism risk in the community: findings and implications.          | Alcoholism (alcohol use disorder factor score) | <i>MBNL2</i>                                    |                                      | 21529783 |
| rs7503807 | rs10445407                        | 670698                         | 0.02                         | Yashin AI                     | Joint influence of small-effect genetic variants on human longevity.                                                        | Longevity                                      | <i>SLC38A10</i>                                 |                                      | 20834067 |
| rs7503807 | rs6565681                         | 242617                         | 0.01                         | Kamada F                      | A genome-wide association study identifies RNF213 as the first Moyamoya disease gene.                                       | Moyamoya disease                               | <i>RNF213</i>                                   |                                      | 21048783 |
| rs6662509 | rs12025126                        | 558050                         | 0.03                         | Ramdas WD                     | A genome-wide association study of optic disc parameters.                                                                   | Vertical cup-disc ratio                        | <i>RERE</i>                                     |                                      | 20548946 |
| rs6662509 | rs2252865                         | 894928                         | 0.00                         | The Schizophrenia consortium  | Genome-wide association study identifies five new schizophrenia loci                                                        | Schizophrenia                                  | <i>NR</i>                                       |                                      | 21926974 |
| rs6662509 | rs4908760                         | 791462                         | 0.00                         | Jin Y                         | Variant of TYR and autoimmunity susceptibility loci in generalized vitiligo.                                                | Vitiligo                                       | <i>RERE</i>                                     |                                      | 20410501 |
| rs584438  | rs11078927                        | 534767                         | 0.01                         | Torgerson DG                  | Meta-analysis of genome-wide association studies of asthma in ethnically diverse North American populations.                | Asthma                                         | <i>GSDMB</i>                                    |                                      | 21804549 |
| rs584438  | rs17609240                        | 488483                         | 0.01                         | Soranzo N                     | A genome-wide meta-analysis identifies 22 loci associated with eight hematological parameters in the HaemGen consortium.    | Hematological parameters                       | <i>GSDMA, ORMDL3</i>                            |                                      | 19820697 |
| rs584438  | rs2290400                         | 532932                         | 0.01                         | Barrett JC                    | Genome-wide association study and meta-analysis find that over 40 loci affect risk of type 1 diabetes.                      | Type 1 diabetes                                | <i>ORMDL3</i>                                   |                                      | 19430480 |
| rs584438  | rs2305480                         | 536976                         | 0.02                         | Moffatt MF                    | A large-scale, consortium-based genomewide association study of asthma.                                                     | Asthma                                         | <i>GSDMB</i>                                    |                                      | 20860503 |
| rs584438  | rs2305480                         | 536976                         | 0.02                         | McGovern DP                   | Genome-wide association identifies multiple ulcerative colitis susceptibility loci.                                         | Ulcerative colitis                             | <i>ORMDL3, ZPBP2M, GSDML</i>                    |                                      | 20228799 |
| rs584438  | rs2315504                         | 447709                         | 0.07                         | Kim JJ                        | Identification of 15 loci influencing height in a Korean population.                                                        | Height                                         | <i>KRT23, KRT20</i>                             |                                      | 19893584 |
| rs584438  | rs2872507                         | 558409                         | 0.01                         | Plagnol V                     | Genome-wide association analysis of autoantibody positivity in type 1 diabetes cases.                                       | Type 1 diabetes autoantibodies                 | <i>ORMDL3</i>                                   |                                      | 21829393 |
| rs584438  | rs2872507                         | 558409                         | 0.01                         | Anderson CA                   | Meta-analysis identifies 29 additional ulcerative colitis risk loci, increasing the number of confirmed associations to 47. | Ulcerative colitis                             | <i>IKZF3, ORMDL3, IKZF3, PNMT, ZPBP2, GSDML</i> |                                      | 21297633 |
| rs584438  | rs2872507                         | 558409                         | 0.01                         | Stahl EA                      | Genome-wide association study meta-analysis identifies seven new rheumatoid arthritis risk loci.                            | Rheumatoid arthritis                           | <i>IKZF3</i>                                    |                                      | 20453842 |
| rs584438  | rs2872507                         | 558409                         | 0.01                         | Barrett JC                    | Genome-wide association defines more than 30 distinct susceptibility loci for Crohn's disease.                              | Crohn's disease                                | <i>ORMDL3</i>                                   |                                      | 18587394 |
| rs584438  | rs3859192                         | 470524                         | 0.03                         | Crosslin DR                   | Genetic variants associated with the white blood cell count in 13,923 subjects in the eMERGE Network.                       | White blood cell count                         | <i>GSDMA</i>                                    |                                      | 22037903 |
| rs584438  | rs3894194                         | 477179                         | 0.00                         | Moffatt MF                    | A large-scale, consortium-based genomewide                                                                                  | Asthma                                         | <i>GSDMA</i>                                    |                                      | 20860503 |

Supplementary Table 17. SNPs identified in other GWAS near novel loci

| Information from GWAS catalog |                                   |                                |                              |                |                                                                                                                                                          |                              |                                                  |                                      |          |
|-------------------------------|-----------------------------------|--------------------------------|------------------------------|----------------|----------------------------------------------------------------------------------------------------------------------------------------------------------|------------------------------|--------------------------------------------------|--------------------------------------|----------|
| Lead SNP                      | GWAS SNP within 1Mb from lead SNP | Distance from lead SNP (bases) | R <sup>2</sup> with lead SNP | First author   | Study                                                                                                                                                    | Disease Trait                | Reported Gene                                    | Same Gene reported for the lead SNP? | PMID     |
|                               |                                   |                                |                              |                | association study of asthma.                                                                                                                             |                              |                                                  |                                      |          |
| rs584438                      | rs4794822                         | 442460                         | 0.02                         | Okada Y        | Identification of nine novel loci associated with white blood cell subtypes in a Japanese population.                                                    | White blood cell types       | <i>PSMD3, CSF3</i>                               |                                      | 21738478 |
| rs584438                      | rs4794822                         | 442460                         | 0.02                         | Okada Y        | Common variations in <i>PSMD3-CSF3</i> and <i>PLCB4</i> are associated with neutrophil count.                                                            | Neutrophil count             | <i>PSMD3, CSF3</i>                               |                                      | 20172861 |
| rs584438                      | rs6503525                         | 503998                         | 0.01                         | Ferreira MA    | Association between <i>ORMDL3</i> , <i>IL1RL1</i> and a deletion on chromosome 17q21 with asthma risk in Australia.                                      | Asthma                       | <i>ORMDL3</i>                                    |                                      | 21150878 |
| rs584438                      | rs7216389                         | 529223                         | 0.01                         | Moffatt MF     | Genetic variants regulating <i>ORMDL3</i> expression contribute to the risk of childhood asthma.                                                         | Asthma                       | <i>ORMDL3</i>                                    |                                      | 17611496 |
| rs584438                      | rs7221109                         | 171114                         | 0.00                         | Barrett JC     | Genome-wide association study and meta-analysis find that over 40 loci affect risk of type 1 diabetes.                                                   | Type 1 diabetes              | Intergenic                                       |                                      | 19430480 |
| rs584438                      | rs8067378                         | 547824                         | 0.01                         | McGovern DP    | Genome-wide association identifies multiple ulcerative colitis susceptibility loci.                                                                      | Ulcerative colitis           | <i>GSDMB</i>                                     |                                      | 20228799 |
| rs584438                      | rs907092                          | 676913                         | 0.01                         | Hirschfield GM | Primary biliary cirrhosis associated with <i>HLA</i> , <i>IL12A</i> , and <i>IL12RB2</i> variants.                                                       | Primary biliary cirrhosis    | <i>IKZF3</i>                                     |                                      | 19458352 |
| rs584438                      | rs9303277                         | 622703                         | 0.01                         | Liu X          | Genome-wide meta-analyses identify three loci associated with primary biliary cirrhosis.                                                                 | Primary biliary cirrhosis    | <i>IKZF3,ZPBP2,GSDMB,ORMDL3</i>                  |                                      | 20639880 |
| rs4735692                     | rs16939046                        | 467709                         | 0.00                         | Luciano M      | Whole genome association scan for genetic polymorphisms influencing information processing speed.                                                        | Information processing speed | <i>AC022274.1</i>                                |                                      | 21130836 |
| rs4735692                     | rs2922763                         | 41952                          | 0.53                         | Speliotes EK   | Association analyses of 249,796 individuals reveal 18 new loci associated with body mass index.                                                          | Body mass index              | <i>HNF4G</i>                                     | Yes                                  | 20935630 |
| rs17381664                    | rs17391694                        | 575295                         | 0.26                         | Lango Allen H  | Hundreds of variants clustered in genomic loci and biological pathways affect human height.                                                              | Height                       | <i>GIPC2</i>                                     |                                      | 20881960 |
| rs17024258                    | rs10494112                        | 205156                         | 0.03                         | Albagha OM     | Genome-wide association identifies three new susceptibility loci for Paget's disease of bone.                                                            | Paget's disease              | <i>CSF1, EPS8LS</i>                              |                                      | 21623375 |
| rs17024258                    | rs12049330                        | 116133                         | 0.02                         | Shi J          | Genome-wide association study of recurrent early-onset major depressive disorder.                                                                        | Major depressive disorder    | <i>ATXN7L2, SYPL2, CYB561D1</i>                  |                                      | 20125088 |
| rs17024258                    | rs12740374                        | 329731                         | 0.00                         | Lette G        | Genome-wide association study of coronary heart disease and its risk factors in 8,090 African Americans: the NHLBI CARE Project.                         | Coronary heart disease       | <i>CELSR2</i>                                    |                                      | 21347282 |
| rs17024258                    | rs12740374                        | 329731                         | 0.00                         | Kathiresan S   | Common variants at 30 loci contribute to polygenic dyslipidemia.                                                                                         | LDL cholesterol              | <i>CELSR2, PSRC1, SORT1</i>                      |                                      | 19060906 |
| rs17024258                    | rs1933182                         | 147483                         | 0.12                         | Kottgen A      | New loci associated with kidney function and chronic kidney disease.                                                                                     | Chronic kidney disease       | <i>SYPL2,ATXN7L2,CYB561D1,PSMA5,AMIGO1,SORT1</i> |                                      | 20383146 |
| rs17024258                    | rs484959                          | 218762                         | 0.01                         | Albagha OM     | Genome-wide association study identifies variants at <i>CSF1</i> , <i>OPTN</i> and <i>TNFRSF11A</i> as genetic risk factors for Paget's disease of bone. | Paget's disease              | <i>CSF1</i>                                      |                                      | 20436471 |
| rs17024258                    | rs599839                          | 325155                         | 0.02                         | Kim YJ         | Large-scale genome-wide association studies in East Asians identify new genetic loci influencing metabolic traits.                                       | Metabolic traits             | <i>CELSR2, PSRC1, SORT1</i>                      |                                      | 21909109 |
| rs17024258                    | rs599839                          | 325155                         | 0.02                         | Schunkert H    | Large-scale association analysis identifies 13 new susceptibility loci for coronary artery disease.                                                      | Coronary heart disease       | <i>SORT1</i>                                     |                                      | 21378990 |



Supplementary Table 17. SNPs identified in other GWAS near novel loci

| Lead SNP   | GWAS SNP within 1Mb from lead SNP | Distance from lead SNP (bases) | R <sup>2</sup> with lead SNP | Information from GWAS catalog  |                                                                                                                                          |                                                           |                             | Same Gene reported for the lead SNP? | PMID     |
|------------|-----------------------------------|--------------------------------|------------------------------|--------------------------------|------------------------------------------------------------------------------------------------------------------------------------------|-----------------------------------------------------------|-----------------------------|--------------------------------------|----------|
|            |                                   |                                |                              | First author                   | Study                                                                                                                                    | Disease Trait                                             | Reported Gene               |                                      |          |
| rs17024258 | rs599839                          | 325155                         | 0.02                         | Suchindran S                   | Genome-wide association study of Lp-PLA(2) activity and mass in the Framingham Heart Study.                                              | Lipoprotein-associated phospholipase A2 activity and mass | <i>PSRC1</i>                |                                      | 20442857 |
| rs17024258 | rs599839                          | 325155                         | 0.02                         | Sandhu MS                      | LDL-cholesterol concentrations: a genome-wide association study.                                                                         | LDL cholesterol                                           | <i>CELSR2,PSRC1</i>         |                                      | 18262040 |
| rs17024258 | rs599839                          | 325155                         | 0.02                         | Willer CJ                      | Newly identified loci that influence lipid concentrations and risk of coronary artery disease.                                           | LDL cholesterol                                           | <i>CELSR2,PSRC1,SORT1</i>   |                                      | 18193043 |
| rs17024258 | rs599839                          | 325155                         | 0.02                         | Wallace C                      | Genome-wide association study identifies genes for biomarkers of cardiovascular disease: serum urate and dyslipidemia.                   | LDL cholesterol                                           | <i>CELSR2,PSRC1</i>         |                                      | 18179892 |
| rs17024258 | rs599839                          | 325155                         | 0.02                         | Samani NJ                      | Genomewide association analysis of coronary artery disease.                                                                              | Coronary heart disease                                    | <i>PSRC1</i>                |                                      | 17634449 |
| rs17024258 | rs629301                          | 329015                         | 0.00                         | Teslovich TM                   | Biological, clinical and population relevance of 95 loci for blood lipids.                                                               | Lipid traits                                              | <i>SORT1</i>                |                                      | 20686565 |
| rs17024258 | rs646776                          | 328791                         | 0.00                         | The Coronary Artery Consortium | A genome-wide association study in Europeans and South Asians identifies five new loci for coronary artery disease.                      | Coronary heart disease                                    | <i>CELSR2, PSRC1, SORT1</i> |                                      | 21378988 |
| rs17024258 | rs646776                          | 328791                         | 0.00                         | Carrasquillo MM                | Genome-wide screen identifies rs646776 near sortilin as a regulator of progranulin levels in human plasma.                               | Progranulin levels                                        | <i>SORT1,CELSR2,PSRC1</i>   |                                      | 21087763 |
| rs17024258 | rs646776                          | 328791                         | 0.00                         | Barber MJ                      | Genome-wide association of lipid-lowering response to statins in combined study populations.                                             | Response to statin therapy                                | <i>CELSR2,PSRC1, SORT1</i>  |                                      | 20339536 |
| rs17024258 | rs646776                          | 328791                         | 0.00                         | Kathiresan S                   | Genome-wide association of early-onset myocardial infarction with single nucleotide polymorphisms and copy number variants.              | Myocardial infarction (early onset)                       | <i>CELSR2, PSRC1, SORT1</i> |                                      | 19198609 |
| rs17024258 | rs646776                          | 328791                         | 0.00                         | Aulchenko YS                   | Loci influencing lipid levels and coronary heart disease risk in 16 European population cohorts.                                         | Cholesterol, total                                        | <i>CELSR2</i>               |                                      | 19060911 |
| rs17024258 | rs646776                          | 328791                         | 0.00                         | Aulchenko YS                   | Loci influencing lipid levels and coronary heart disease risk in 16 European population cohorts.                                         | LDL cholesterol                                           | <i>CELSR2</i>               |                                      | 19060911 |
| rs17024258 | rs646776                          | 328791                         | 0.00                         | Sabatti C                      | Genome-wide association analysis of metabolic traits in a birth cohort from a founder population.                                        | LDL cholesterol                                           | <i>CELSR2, PSRC1, SORT1</i> |                                      | 19060910 |
| rs17024258 | rs646776                          | 328791                         | 0.00                         | Kathiresan S                   | Six new loci associated with blood low-density lipoprotein cholesterol, high-density lipoprotein cholesterol or triglycerides in humans. | LDL cholesterol                                           | <i>CELSR2,PSRC1,SORT1</i>   |                                      | 18193044 |
| rs17024258 | rs6537837                         | 27589                          | 0.02                         | Shi J                          | Genome-wide association study of recurrent early-onset major depressive disorder.                                                        | Major depressive disorder                                 | <i>GNAT2, GNAI3, AMPD2</i>  | Yes                                  | 20125088 |

Supplementary Table 17. SNPs identified in other GWAS near novel loci

| Information from GWAS catalog |                                   |                                |                              |               |                                                                                                                                                                                                                           |                                                           |               |                                      |          |
|-------------------------------|-----------------------------------|--------------------------------|------------------------------|---------------|---------------------------------------------------------------------------------------------------------------------------------------------------------------------------------------------------------------------------|-----------------------------------------------------------|---------------|--------------------------------------|----------|
| Lead SNP                      | GWAS SNP within 1Mb from lead SNP | Distance from lead SNP (bases) | R <sup>2</sup> with lead SNP | First author  | Study                                                                                                                                                                                                                     | Disease Trait                                             | Reported Gene | Same Gene reported for the lead SNP? | PMID     |
| rs17024258                    | rs660240                          | 329483                         | 0.00                         | Middelberg RP | Genetic variants in LPL, OASL and TOMM40/APOE-C1-C2-C4 genes are associated with multiple cardiovascular-related traits.                                                                                                  | Cardiovascular disease risk factors                       | <i>CELSR2</i> |                                      | 21943158 |
| rs17024258                    | rs660240                          | 329483                         | 0.00                         | Waterworth DM | Genetic variants influencing circulating lipid levels and risk of coronary artery disease.                                                                                                                                | LDL cholesterol                                           | <i>CELSR2</i> |                                      | 20864672 |
| rs17024258                    | rs7528419                         | 330129                         | 0.00                         | Grallert H    | Eight genetic loci associated with variation in lipoprotein-associated phospholipase A2 mass and activity and coronary heart disease: meta-analysis of genome-wide association studies from five community-based studies. | Lipoprotein-associated phospholipase A2 activity and mass | <i>CELSR2</i> |                                      | 22003152 |
| rs17024258                    | rs958798                          | 622902                         | 0.01                         | Mosing MA     | A genome-wide association study of self-rated health.                                                                                                                                                                     | Self-rated health                                         | <i>KCNC4</i>  |                                      | 20707712 |

## 2. SUPPLEMENTARY FIGURES

**Supplementary Figures 1-2.** Quantile-quantile (Q-Q) plots of SNPs in stage 1 meta-analyses (black) and after removing any SNPs within 1 Mb of the previously reported genome-wide significant hits for BMI, height or WHR and our novel loci (red). The outcomes represented are tails of BMI (panel a; Supplementary Figure [SF] 1), height (panel b; SF1), WHR (panel c; SF 1), overweight (panel a; SF 2), obesity class I (panel b; SF 2), obesity class II (panel c; SF 2), and obesity class III (panel d; SF2).

### Supplementary Figure 1. Quantile-quantile (Q-Q) plots of the stage 1 meta-analyses

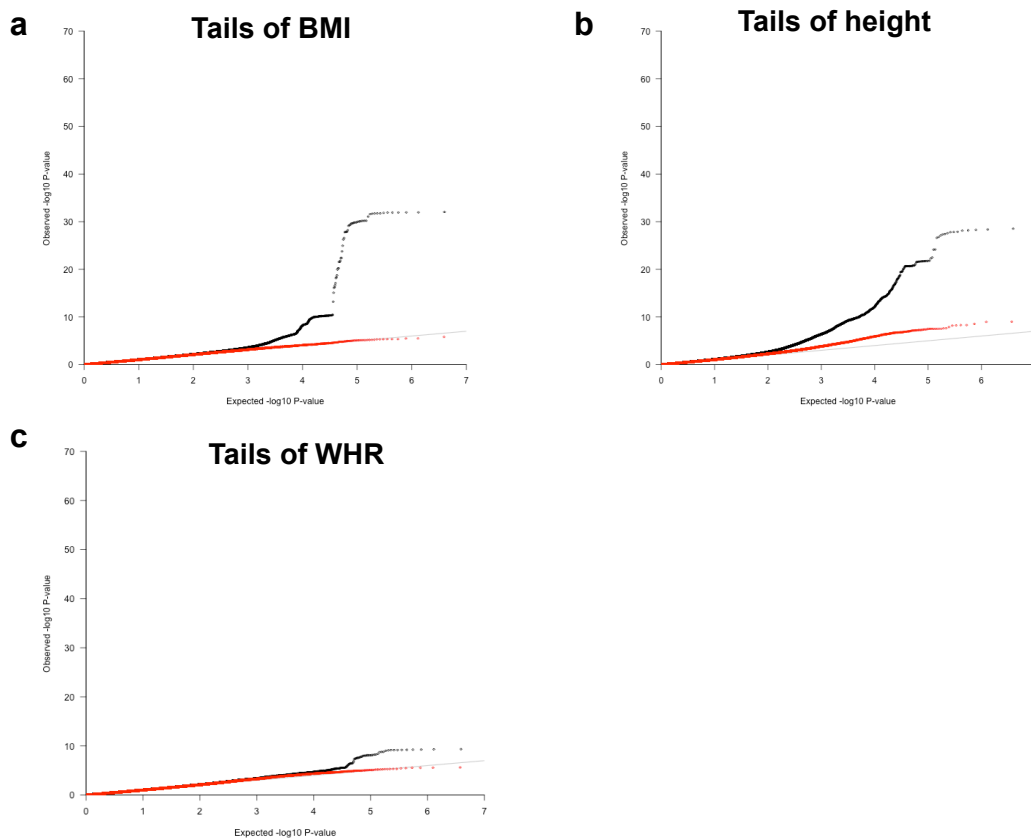

**Supplementary Figure 2.** Quantile-quantile (Q-Q) plots of the stage 1 meta-analyses

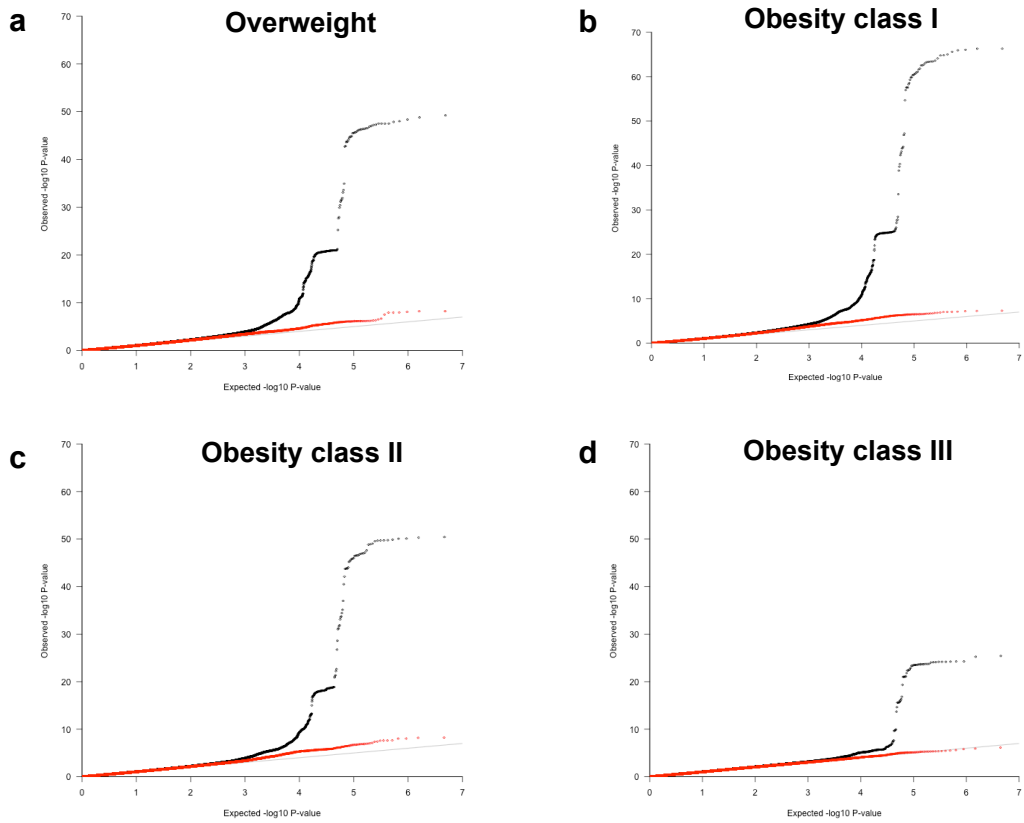

**Supplementary Figures 3-4.** Manhattan plots showing the significance of association for all SNPs in the stage 1 meta-analyses. SNPs are plotted on the x-axis according to their position on each chromosome against association with respective outcome on the y-axis (shown as  $-\log_{10}$  P-value). SNPs previously reported to show genome-wide significant association with BMI, WHR or height are shown in red, and those reaching genome-wide significance for the first time in our analyses (stage 1+2) are highlighted in green. The outcomes represented are tails of BMI (panel a; Supplementary Figure [SF] 3), height (panel b; SF3), WHR (panel c; SF3), overweight (panel a; SF4), obesity class I (panel b; SF4), obesity class II (panel c; SF4) and obesity class III (panel d; SF4).

**Supplementary Figure 3.** Manhattan plots showing the significance of association for all SNPs in the stage 1 meta-analyses for the tails of BMI, height, and WHR

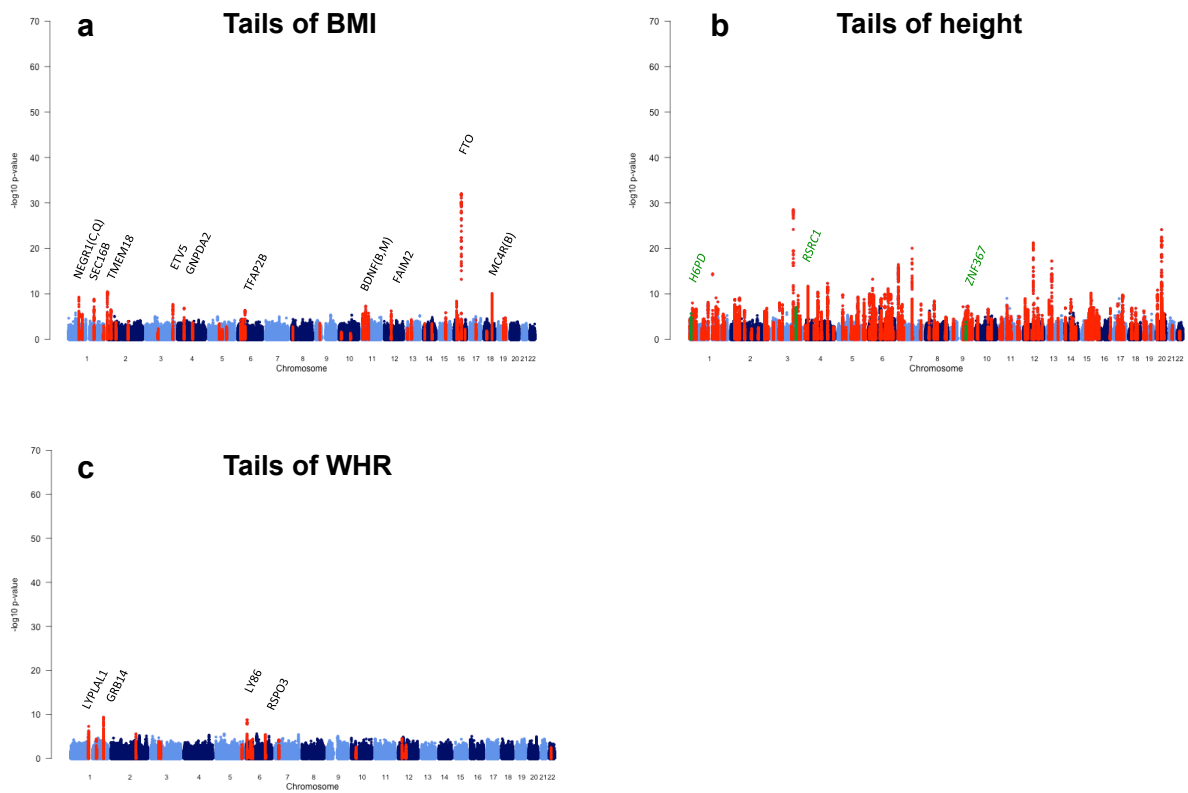

**Supplementary Figure 4.** Manhattan plots showing the significance of association for all SNPs in the stage 1 meta-analyses for the clinical classes of obesity

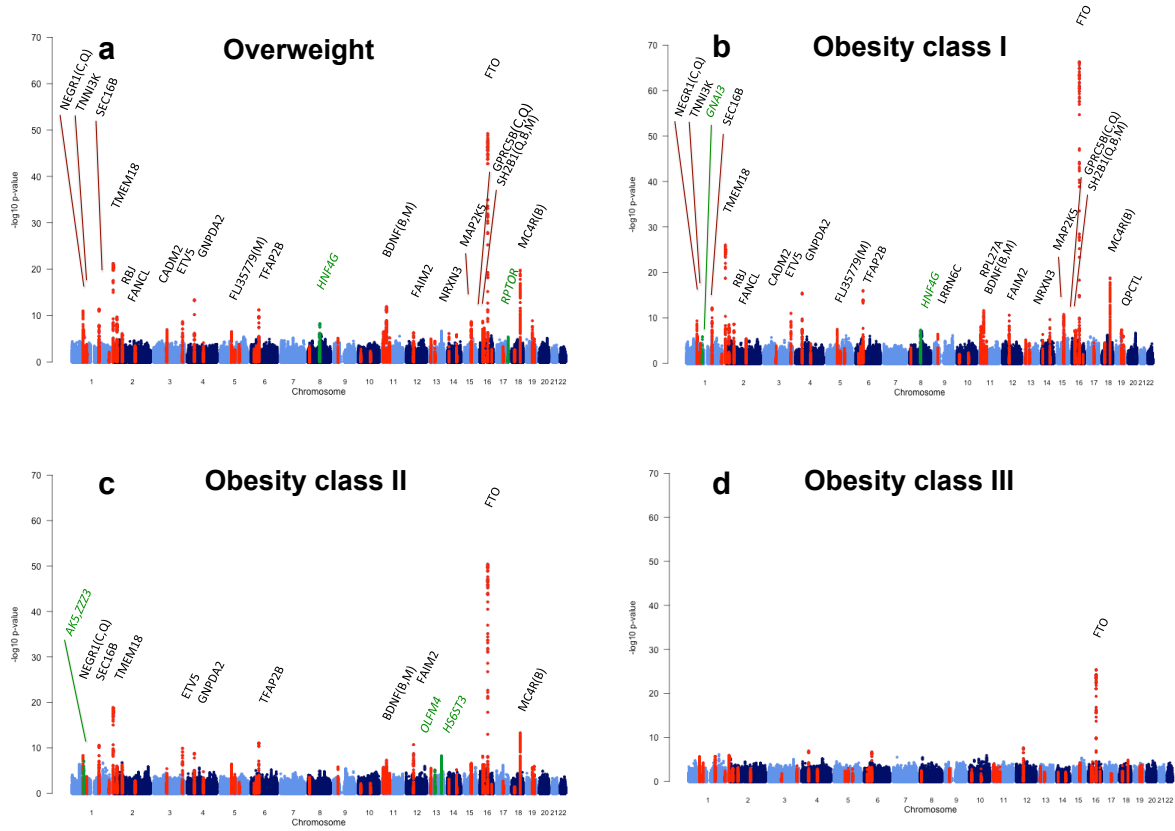

**Supplementary Figures 5-8.** Regional plots of the 11 novel loci associated with overweight (Supplementary Figure [SF] 5), obesity class I (SF6), obesity class II (SF7), and tails of height (SF8). SNPs are plotted by position on chromosome against association with respective outcome ( $-\log_{10}$  P-value). The SNP name shown on the plot was the most significant SNP in the combined stage 1+2 meta-analysis. Estimated recombination rates (from HapMap) are plotted in cyan to reflect the local LD structure. The SNPs surrounding the most significant SNP are color-coded to reflect their LD with this SNP (taken from pairwise  $r^2$  values from the HapMap CEU database; [www.hapmap.org](http://www.hapmap.org)). Genes, position of exons, and direction of transcription from UCSC genome browser ([genome.ucsc.edu](http://genome.ucsc.edu)) are noted. Hash marks represent SNP positions available in the meta-analysis. Plots were generated using LocusZoom (<http://csg.sph.umich.edu/locuszoom>) using a distance of 500kb from the SNP noted and HapMap CEU as the reference panel with the following variant annotations: Upright triangles=framestop/splice; upside-down triangle=nonsynonymous variant; filled square=synonymous/UTR.

**Supplementary Figure 5. Regional plots of the novel loci associated with overweight**

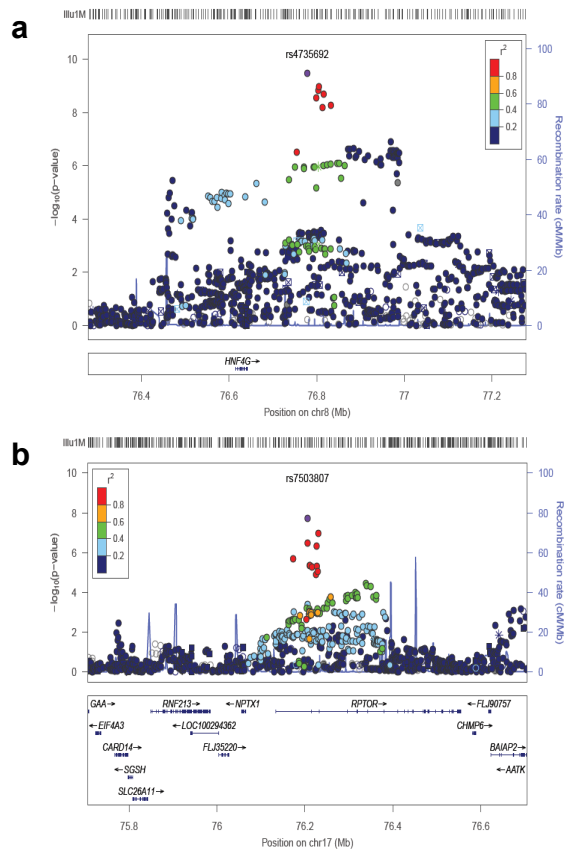

**Supplementary Figure 6. Regional plots of the novel loci associated with obesity class I**

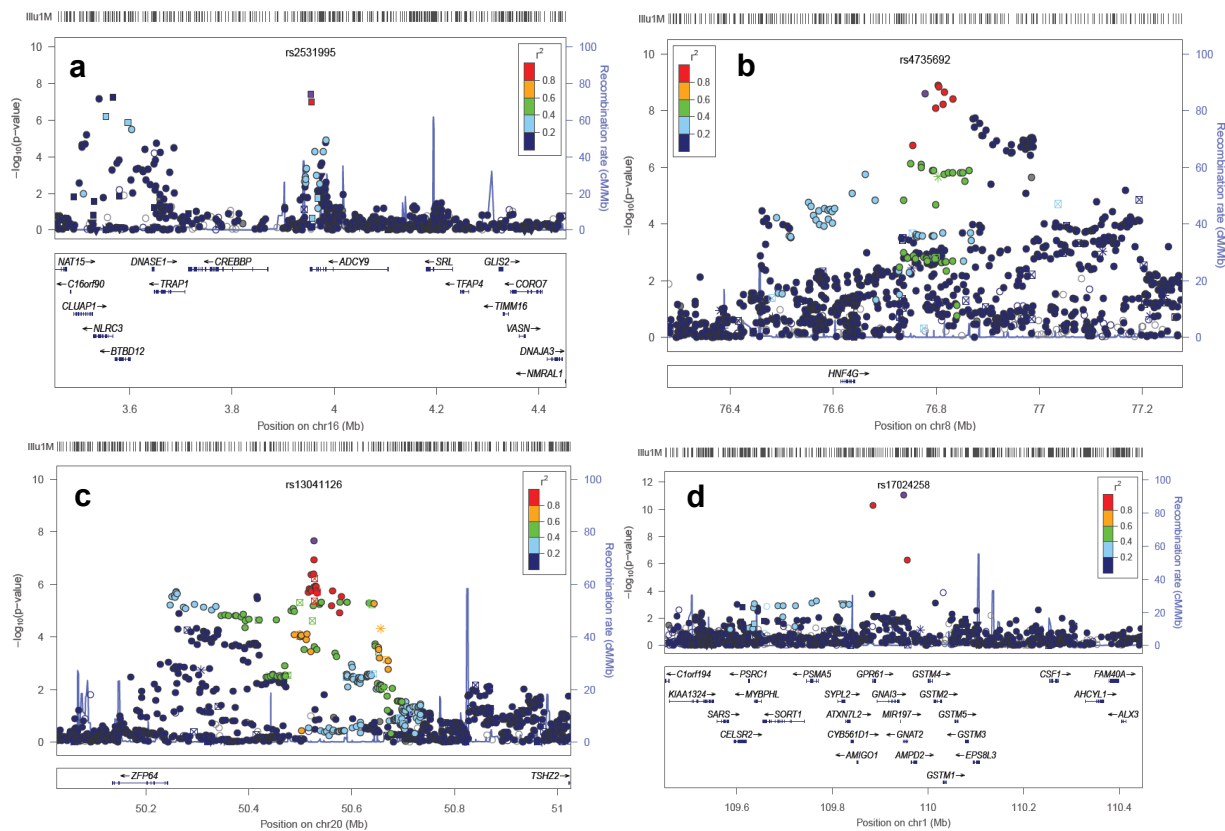



Supplementary Figure 7. Regional plots of the novel loci associated with obesity class II

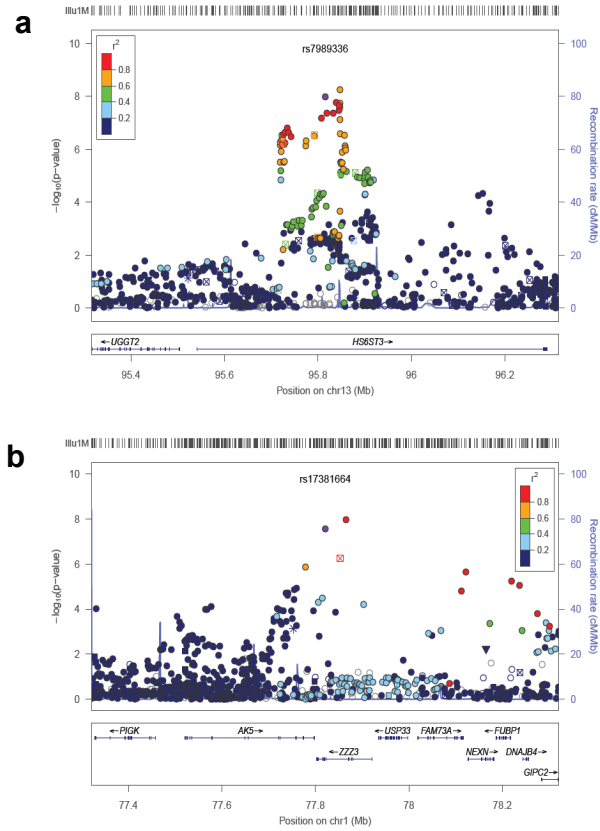

## Supplementary Figure 8. Regional plot of the novel loci associated with tails of height

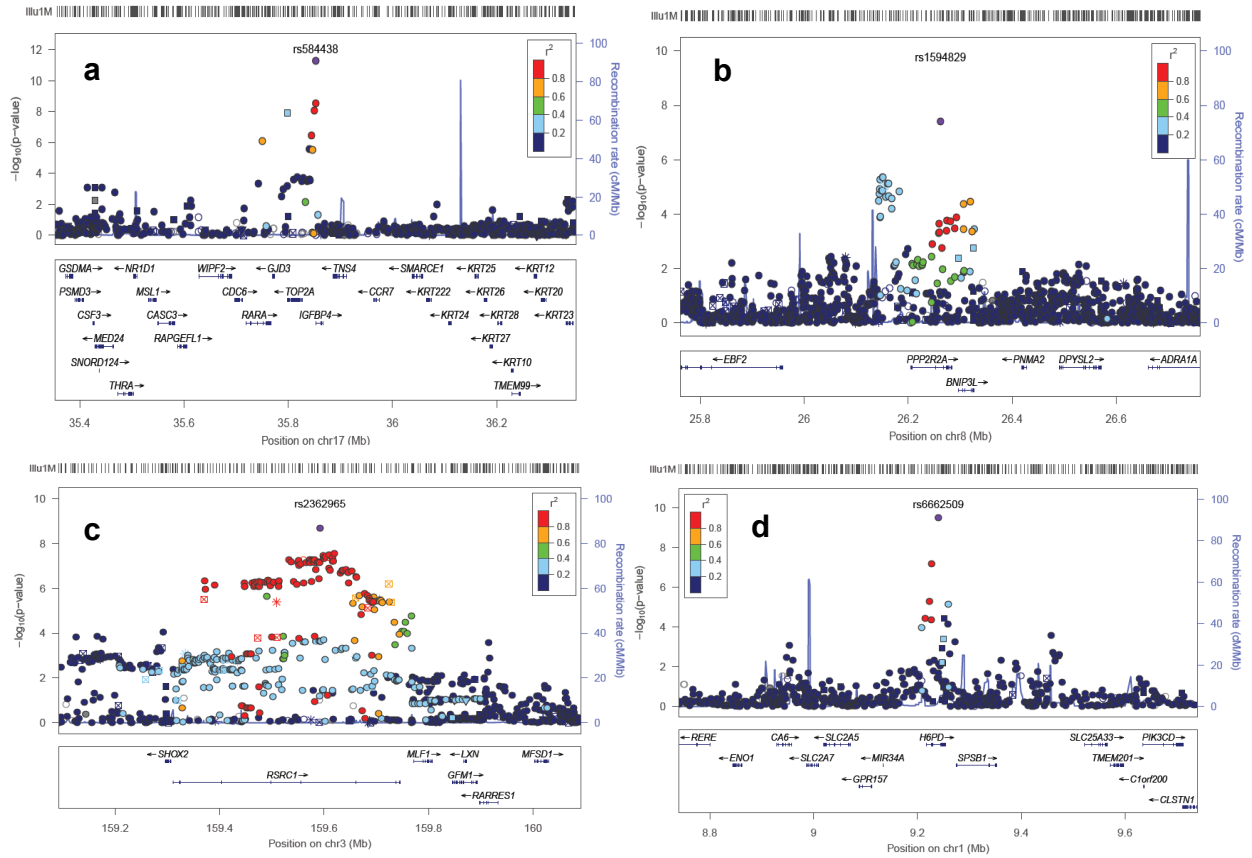

**Supplementary Figure 9.** Q-Q plots of the  $-\log_{10}$  p-values for the difference between the observed associations for the tails and expected associations based on the overall distributions for height (panel a) and WHR (panel b).

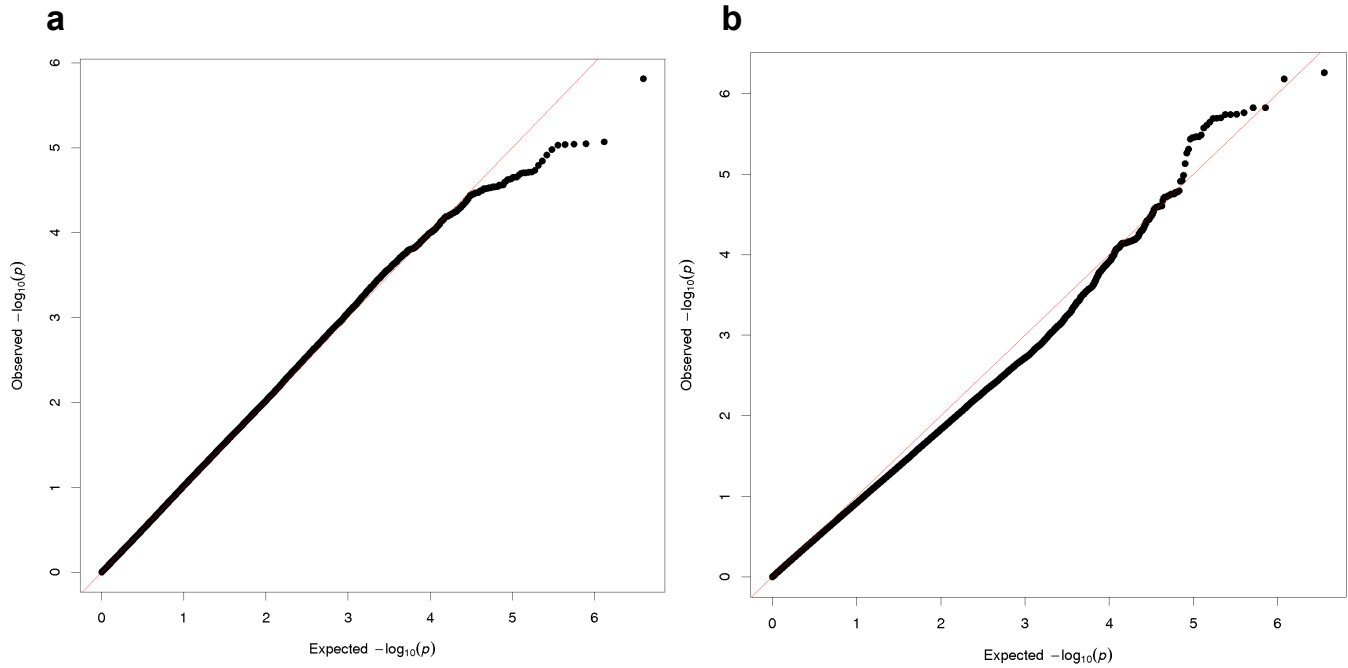

**Supplementary Figure 10.** Variance in tails of height and WHR explained by common variants. The y-axis represents the proportion of variance explained (Nagelkerke  $R^2$ ) in two studies not included in the discovery meta-analysis. The prediction model was based on the results from the stage 1 meta-analysis of the tails (solid line) or full distribution (dotted line) of height (panel A) and WHR (panel B).

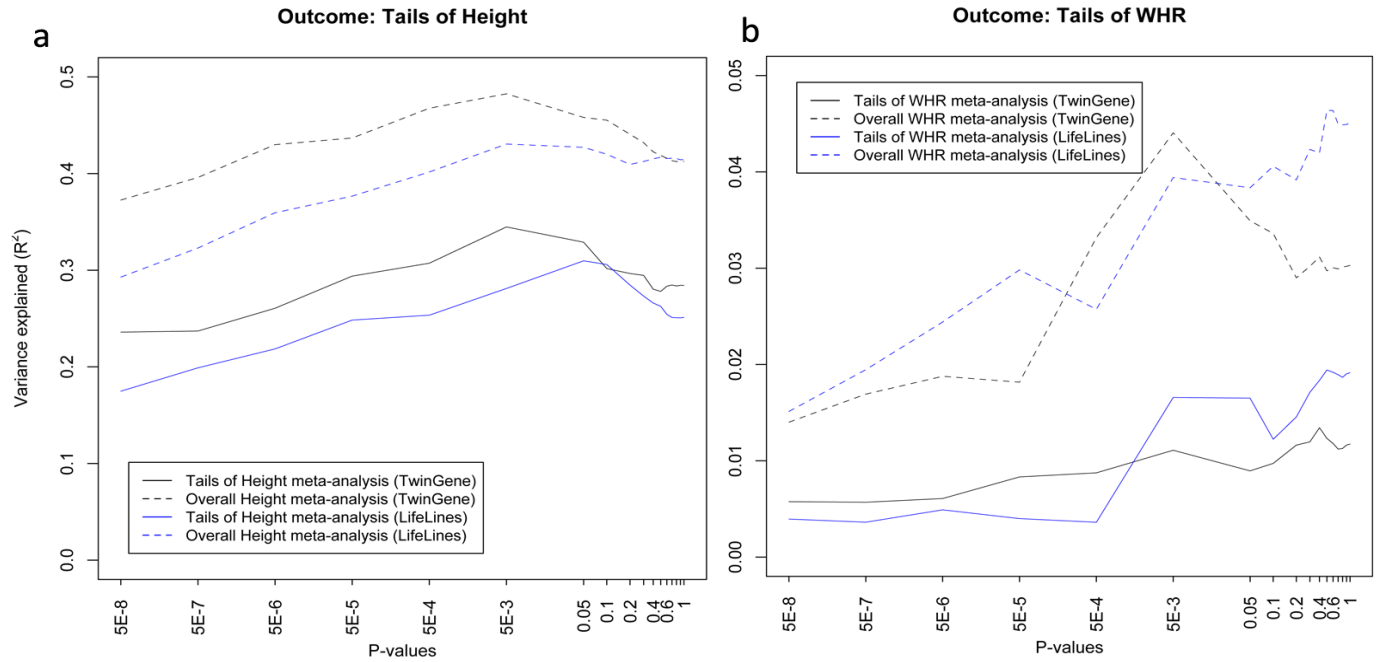

**Supplementary Figure 11.** Comparison of the phenotypic variance in overall BMI (Panel A) and tails of BMI (Panel B) explained by common genetic variants. By using methods for reweighting to a liability scale (described by Lee *et al*<sup>1</sup>), we compared the variance explained for overall BMI and tails of BMI using two different polygene predictors (overall BMI and tails of BMI). In red, the prediction model was based on BMI from the full distribution. In black, the prediction model was based on the results from the stage I meta-analysis of tails of BMI. Only the two population-based studies where the sampling fraction for the tails of BMI was known were included (TWINGENE and LifeLines).

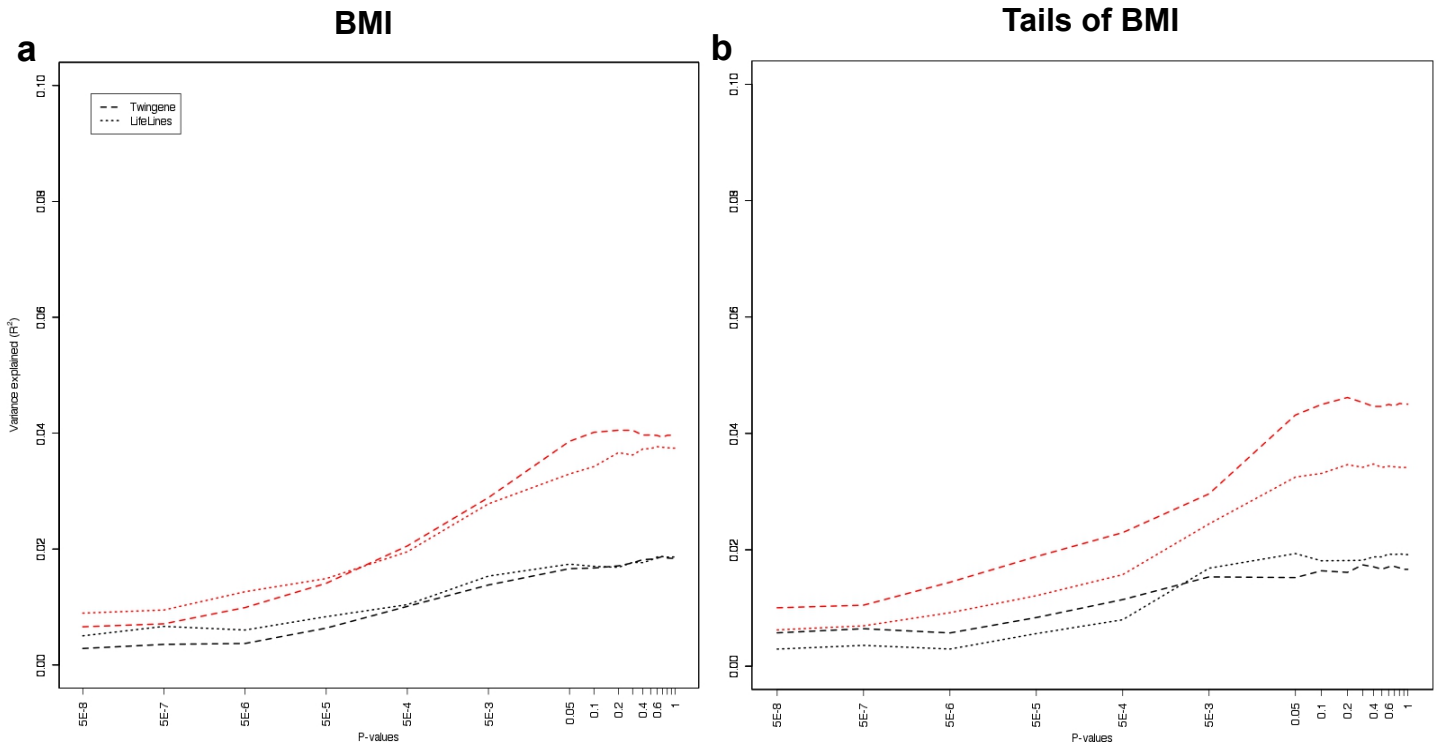

**Supplementary Figures 12-14.** Secondary signals at the *FTO* (Supplementary Figure [SF] 12), *RSPO3* (SF13), and *FANCL* (SF14) loci contributing to tails of BMI, tails of WHR, and overweight (upper panel) and obesity class I (lower panel), respectively. SNPs are plotted by position on chromosome against association with respective outcome ( $-\log_{10}$  P-value). Panel A highlights the most significant SNP in stage 1+2 meta-analysis; panel B the secondary signal that also retained genome-wide significance after conditioning on all other SNPs in the region. Estimated recombination rates (from HapMap) are plotted in cyan to reflect the local LD structure. The SNPs surrounding the most significant SNP are color-coded to reflect their LD with this SNP (taken from pairwise  $r^2$  values from the HapMap CEU database, [www.hapmap.org](http://www.hapmap.org)). Genes, exons, and direction of transcription from UCSC genome browser ([genome.ucsc.edu](http://genome.ucsc.edu)) are noted. Hash marks at the top of the figure represent positions of SNPs in the meta-analysis. Regional plots were generated using LocusZoom (<http://csg.sph.umich.edu/locuszoom>) using a distance of 500kb from the SNP noted and HapMap CEU as the reference panel with the following variant annotations: Upright triangles=framestop/splice; upside-down triangle=nonsynonymous variant; filled square=synonymous/UTR.

**Supplementary Figure 12. Secondary signals at the *FTO* locus**

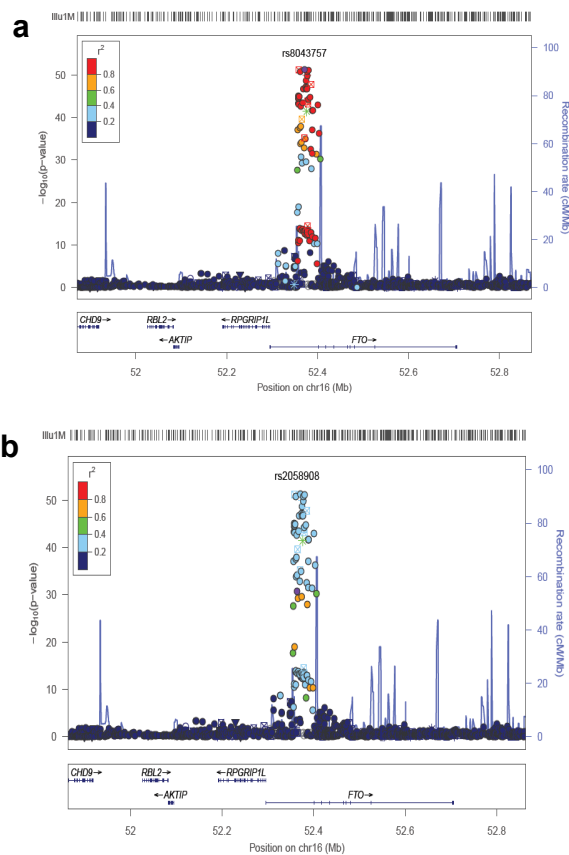

**Supplementary Figure 13. Secondary signals at the *RSPO3* locus**

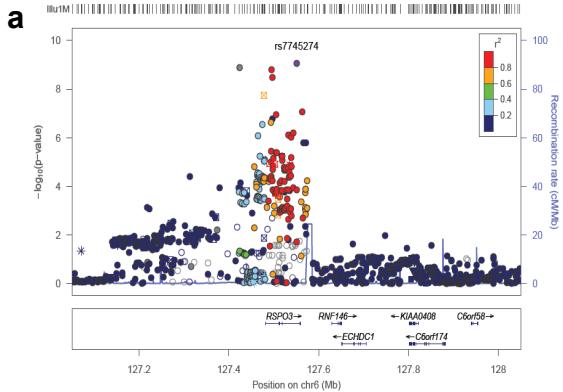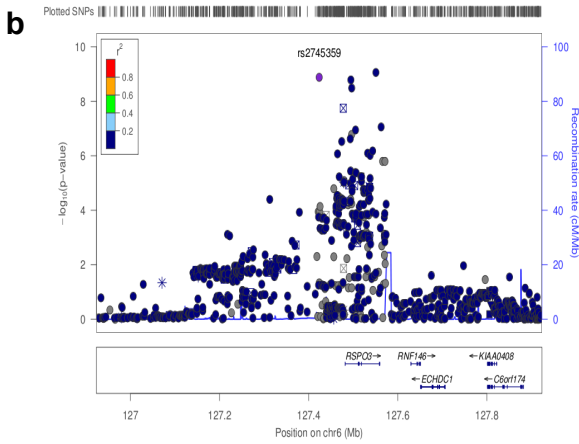

# Supplementary Figure 14. Secondary signals at the *FANCL* locus

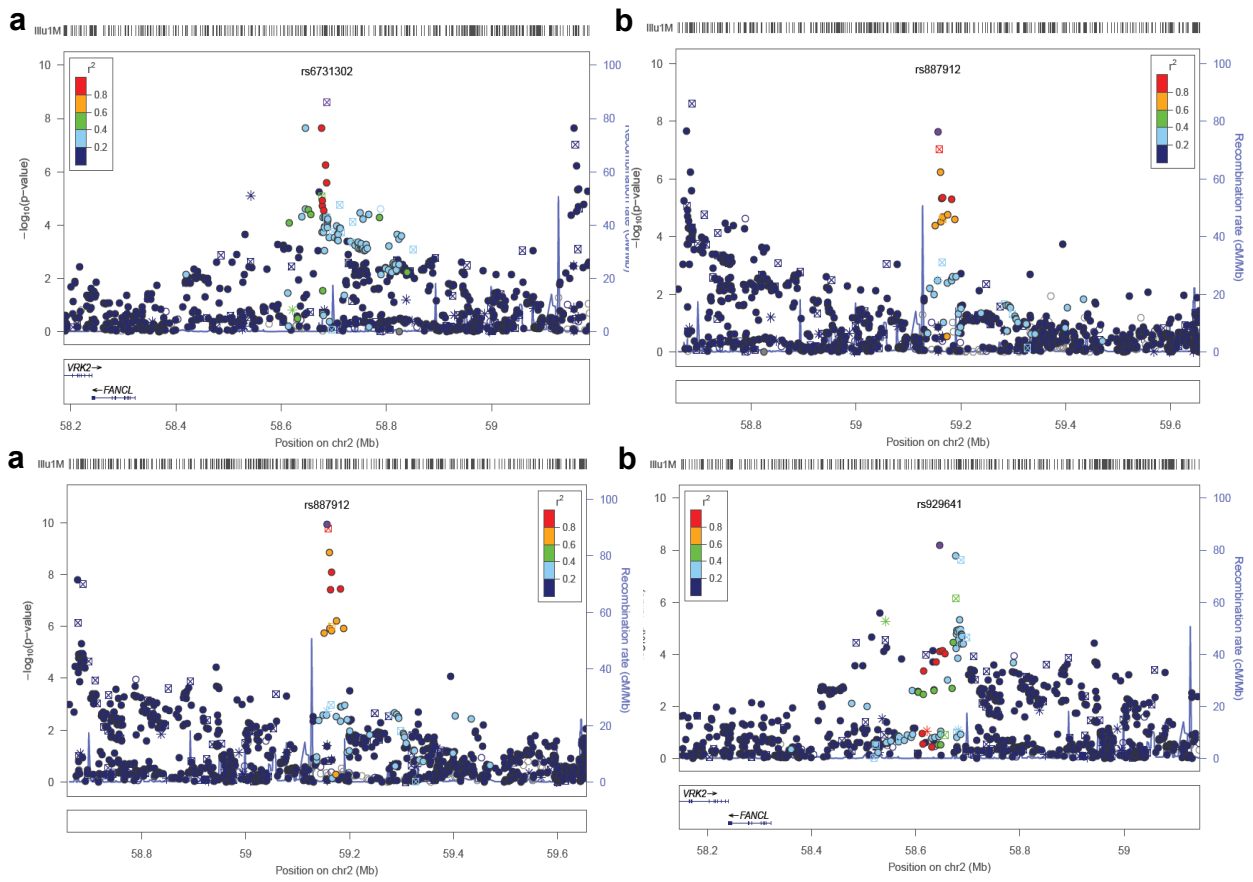



### 3. SUPPLEMENTARY NOTE

#### A. Summary Of Literature Search On Genes Nearest To The 11 Novel Loci

We utilized SNIPPER (<http://csg.sph.umich.edu/boehnke/snipper/>) and SNAP<sup>2</sup> to derive potential biological links of genes in the proximity of the novel association signals ( $\pm 500$ kb of the index SNP), and present a summary in this section.

#### Tails of Height

**rs584438 (*IGFBP4*):** A total of 30 genes are found within 500 kb of the lead marker, rs584438. Two of the more biologically relevant genes that lie within the association signal region are *IGFBP4* and *CDC6*. *IGFBP4* (insulin-like growth factor binding protein) is located 504bp from rs584438. This protein is abundant in skeletal tissue and binds class I and II IGF hormones.<sup>3</sup> *IGFBP4* activity seems to play an important role in the level of bone mineral density.<sup>4</sup> In mice, increased expression of *IGFBP4* in bone leads to decreased cancellous bone growth and remodelling during postnatal growth.<sup>3</sup> *CDC6* (cell division cycle 6 homolog) is located 140 kb downstream from the lead marker and plays an important role in regulating the early stages of DNA replication. The *CDC6* gene has been associated with Meier-Gorlin Syndrome, a form of primordial dwarfism, which presents with a mosaic of features including short stature.<sup>5</sup> While outside of the main signal region, *KRT20* (keratin 20) is 423 kb upstream of the lead marker. *KRT20* encodes a protein that is a member of the keratin family and is found in a large cluster of type I cytokeratin genes in the region of 17q12-q21. The keratins are intermediate filament proteins responsible for the structural integrity of epithelial cells. A previous GWA study identified a SNP near *KRT20* to be associated with height in a Korean population.<sup>6</sup> Several additional GWA studies have reported associations within the 1 Mb region of rs584438 for asthma,<sup>7-10</sup> ulcerative colitis,<sup>11,12</sup> type I diabetes,<sup>13,14</sup> rheumatoid arthritis,<sup>15</sup> Crohn's disease,<sup>16</sup> haematological variables,<sup>17-19</sup> and primary biliary cirrhosis.<sup>20,21</sup> All of these signals appear to be independent of our lead SNP signal ( $r^2 < 0.2$ ; **Supplementary Table 17**).

**rs6662509 (*H6PD*):** A total of 14 genes are found within 500 kb of the lead marker, rs6662509. The SNP is located within an intron in the hexose-6-phosphate dehydrogenase glucose 1-dehydrogenase gene (*H6PD*). *H6PD* is a luminal enzyme of the endoplasmic reticulum involved in several pathways, including insulin resistance and the metabolic syndrome.<sup>22,23</sup> It interacts

with hydroxysteroid (11-beta) dehydrogenase 1 (HSD11B1), and mutations in both *H6PD* and *HSD11B1* lead to cortisone reductase deficiency, a disease characterized by excessive androgen production and accelerated bone aging.<sup>24</sup> *H6PD* gene expression has been associated with type 2 diabetes mellitus<sup>25</sup> and *H6PD* null mice develop a severe skeletal myopathy.<sup>26</sup> GWA studies have reported associations within the 1 Mb region of rs6662509 for vertical cup-disc ratio among optic disk parameters,<sup>27</sup> schizophrenia,<sup>28</sup> and vitiligo.<sup>29</sup> However, all of these associated markers seem to be independent of the lead SNP, rs6662509 ( $r^2 < 0.2$ ; **Supplementary Table 17**).

**rs2362965 (*RSRC1*/*SHOX2*):** A total of seven genes are found near our lead marker, rs2362965. The lead marker lies within the *RSRC1* gene (arginine/serine-rich coiled-coil 1, 3q25.32), which encodes a protein involved in mRNA splicing and has been associated with schizophrenia.<sup>30</sup> The *SHOX2* gene lies 285 kb upstream of our lead marker. This gene is a member of the SHOX (short stature homeobox) gene family, which plays a major role in skeletal limb development. The *SHOX2* gene is found in all vertebrates and acts as a transcription activator or repressor in different cell types. While it has not been definitively implicated in any human phenotype, restricting the SHOX2 protein in mice results in a shortening of the proximal hind and fore limbs.<sup>31</sup>

**rs1594829 (*PPP2R2A*):** There are six genes within 500 kb of rs1594829. Many of these genes are associated with cancer-related phenotypes, but do not show an obvious association with height. The lead marker is an intronic SNP within the *PPP2R2A* (protein phosphatase 2, regulatory subunit B, alpha) gene, which codes for the  $\beta$  subunit of the regulatory protein phosphatase 2 (PP2A). PP2A plays a role in the downregulation of cellular growth.<sup>32</sup> Although *EBF2* (early B-cell factor 2) lies outside of the main signal region (303kb upstream), its function may relate to height. This protein belongs to the COE (Collier/Olf/EBF) family of helix-loop-helix transcription factors, which plays an important role in variety of developmental processes including neuronal cell differentiation and adipogenesis.<sup>33</sup> Studies with mice suggest that this gene may be involved in the differentiation of osteoblasts.<sup>34</sup>

## **Overweight**

**rs7503807 (*RPTOR*):** A total of 13 genes are found within 500 kb of our lead marker, rs7503807. Two of these genes (*RPTOR* and *BAIAP2*) have functions related to obesity. The SNP lies within the *RPTOR* gene (regulatory associated protein of MTOR, complex 1), which encodes an element of the raptor-mTOR complex that regulates cell growth by directing the accumulation of mass based on nutrient availability in the cellular environment. This complex operates in response to nutrient and insulin levels.<sup>35</sup> While outside of the main signal region (~418 kb upstream from the lead marker), *BAIAP2* (BAI1-associated protein 2) encodes a brain-specific angiogenesis inhibitor (BAI1)-binding protein. This protein plays a role in insulin uptake as part of the insulin receptor substrate, and likely plays a role in insulin uptake in the central nervous system. This gene has also shown an association with several neurological and behavioral phenotypes, such as brain lateralization, ADHD, autism and neurodegenerative disorders.<sup>36,37</sup> Two GWA studies have found associations within 1 Mb of the lead marker, rs7503807, including associations with longevity<sup>38</sup> and with Moyamoya disease.<sup>39</sup> Both of these SNPs appear to be independent of the lead marker (**Supplementary Table 17**).

## **Overweight and obesity class I**

**rs4735692 (*HNF4G*):** The peak signal is intergenic and only one gene, *HNF4G*, is found in the 1Mb surrounding region. rs4735692 is 137 kb downstream of *HNF4G* (Hepatocyte nuclear factor 4-gamma), which is a transcription factor which is expressed in the pancreas, kidney, small intestine, and testes. In a previous GIANT study of BMI, we detected suggestive evidence for association between another SNP in this region, rs2922763 ( $D'=0.91$  and  $r^2=0.52$  with rs4735692) and BMI ( $p=6.46 \times 10^{-8}$ ).<sup>40</sup> In addition, two previous studies have reported associations between SNPs near *HNF4G* and inflammatory bowel disease (rs830772,  $D'=0.74$  and  $r^2=0.20$ )<sup>41</sup> and information processing speed (rs16939046,  $r^2 = 0.00$ ),<sup>42</sup> although it is unclear if these signals are localizing the same genetic signals (**Supplementary Table 17**).

## **Obesity class I**

**rs17024258 (*GNAT2*):** There are 27 genes within 500 kb of the peak signal, rs17024258. The lead SNP is intronic in *GNAT2* (guanine nucleotide binding protein (G protein), alpha transducing activity polypeptide 2, 1p13.1), which is part of a 3 subunit G protein, transducin.<sup>43</sup>

Perhaps more interesting, the SNP is located 207kb from well-known lipid gene *SORT1* (sortilin 1, 1p13.3), which is expressed in multiple cell types and has been reported to be involved in insulin responsiveness in adipose cells.<sup>44</sup> Sortilin is an essential player in adipocyte and muscle glucose metabolism through the control of *GLUT4* localization. *SORT1* is downregulated in obesity and studies have shown decreased levels of sortilin in the adipose tissues of morbidly obese humans and mice, and in skeletal muscle of obese mice.<sup>45</sup> TNF-alpha is thought to be involved in this downregulation, suggesting that chronic low-grade inflammation in obesity could thus contribute to insulin resistance by modulating proteins that control *GLUT4*. In addition, *SORT1* is an intracellular sorting receptor for apolipoprotein (apo) B100 that facilitates the formation and hepatic export of apoB100-containing lipoproteins, and regulates plasma low-density lipoprotein cholesterol (LDL-C).<sup>46</sup> rs17024258 is also 6 kb downstream of *MIR197* gene (microRNA 197) and 9 kb downstream of *GNAI3* (guanine nucleotide binding protein (G protein), alpha inhibiting activity polypeptide 3), which encodes a GNP-binding protein. The heterotrimeric GNP-binding proteins are signal transducers that communicate signals from many hormones, neurotransmitters, chemokines, and autocrine and paracrine factors.<sup>47</sup> Eighty-four kb upstream of our signal is the *GSTM1* (glutathione S-transferase mu 1) gene, which encodes a glutathione S-transferase belonging to the  $\mu$  class of enzymes. *GSTM1* functions in the detoxification of electrophilic compounds, including carcinogens, therapeutic drugs, and environmental toxins, by conjugation with glutathione and has been implicated in numerous diseases, such as essential hypertension,<sup>48</sup> type 2 diabetes,<sup>49,50</sup> and smoking-related coronary artery risk and disease.<sup>51,52</sup>

Several GWA studies have reported associations within the 1 MB region of rs17024258, notably with LDL and total cholesterol,<sup>53-59</sup> coronary heart disease,<sup>54,60-65</sup> progranulin,<sup>66</sup> metabolic traits,<sup>67</sup> lipoprotein-associated phospholipase A2 activity and mass,<sup>68,69</sup> response to statins,<sup>70</sup> and multiple cardiovascular disease risk factors;<sup>71</sup> however, all signals were independent of our reported SNP. Additional studies have identified associations with SNPs within 500 kb of rs17024258 for Paget's disease,<sup>72,73</sup> major depressive disorder,<sup>74</sup> kidney function,<sup>75</sup> and self-rated health.<sup>76</sup> Finally, a suggestive GWA was reported between SNPs in *GNAT2* with recurrent early-onset major depressive disorder, although our signal is most likely distinct from this signal (rs6537837-intronic *GNAI3*;  $r^2 = 0.012$ )<sup>74</sup> (**Supplementary Table 17**).

**rs2531995 (*ADCY9*):** There are seventeen genes located within 1 Mb of rs2531995. The SNP is located within the 3' untranslated region of *ADCY9* (adenylate cyclase 9), a membrane-bound enzyme that catalyses the formation of cyclic AMP from ATP. *ADCY9* is regulated by a family of G protein-coupled receptors, protein kinases, and calcium. A previous study by GIANT reported a suggestive association between another SNP in the *ADCY9* region (rs2444217) and body mass index ( $r^2 = 0.23$ ; BMI: p-meta=  $9.49 \times 10^{-8}$ ).<sup>40</sup> Our lead SNP, rs2531995, is also 83 kb from *CREBBP* (CREB binding protein), which is ubiquitously expressed and known to play critical roles in embryonic development, growth control, and homeostasis by coupling chromatin remodeling to transcription factor recognition. Mutations in *CREBBP* cause Rubinstein-Taybi syndrome (RTS), which is characterized by distinctive anthropometric characteristics. rs2531995 is also 226 kb from *SRL* (sarcalumenin), a gene potentially involved in the regulation of calcium transport and 246 kb from *TRAPI* (TNF receptor-associated protein 1), which encodes a highly conserved molecular chaperone that has key roles in signal transduction, protein folding, protein degradation, and morphologic evolution. Several GWA studies have reported associations within the 1 MB region of rs2531995, notably with partial epilepsies,<sup>77</sup> metabolic syndrome,<sup>78</sup> although, it is unlikely that these signals are localizing the same genetic signals (**Supplementary Table 17**).

**rs13041126 (*MRPS33P4*):** There are only two genes within 500 kb of the lead marker, rs13041126. One of these genes, zinc finger protein 64 homolog, mouse (*ZFP64*), lies within the peak signal region. *ZFP64* is a human zinc finger protein, a family of proteins responsible for transcriptional regulation. Associations have been found between *ZFP64* and non-progressive, autosomal recessive, congenital cerebellar ataxia<sup>79</sup> and with mantle cell lymphoma (MCL) indicating *ZFP64*'s role as a tumor suppressor.<sup>80</sup> Several GWA studies have reported associations within the 1 Mb region of rs13041126, notably with amyotrophic lateral sclerosis,<sup>81</sup> haemoglobin concentrations,<sup>82</sup> and male infertility<sup>83</sup> (**Supplementary Table 17**).

### **Obesity class II**

**rs7989336 (*HS6ST3*):** There are only two genes within 500 kb of the lead marker, both lying within the main signal region. The lead marker, rs7989336, is located in an intron of heparan

sulfate 6-O-sulfotransferase 3 (*HS6ST3*), which functions to generate structures required for interactions between heparan sulfate and a variety of proteins. *HS6ST3* is ubiquitously expressed<sup>84</sup> and is regulated in tissue-specific manners. rs7989336 is 312 kb upstream of the *UGGT2* gene (UDP-glucose glycoprotein glucosyltransferase 2), which encodes a soluble protein that provides quality control for protein transport out of the endoplasmic reticulum. GWA studies have indicated an association within the 1 MB region around rs7989336, with diabetic retinopathy (rs2038823,  $r^2 = 0.24$ )<sup>85</sup> and alcoholism;<sup>86</sup> although these signals may be independent from our lead SNP (**Supplementary Table 17**).

**rs17381664 (ZZZ3):** There are a total of nine genes that lie within 500 kb of the peak signal. The lead marker, rs17381664, is located within an intron of the *ZZZ3* (ZZ-type zinc finger-containing protein 3) gene encoding a component of the Ada-Two-A-containing (ATAC) complex. ATAC complexes have an essential role in mammalian development, histone acetyltransferase activity on histones H3 and H4, cell cycle progression, and prevention of apoptosis during embryogenesis.<sup>87,88</sup> Twenty-three kb from our lead marker is the *AK5* (adenylate kinase 5) gene, which encodes a member of the adenylate kinase family, involved in regulating the adenine nucleotide composition within a cell. *AK5* is specifically expressed in brain, and is primarily located in the neuronal cytosolic fraction.<sup>89</sup> The SNP is 306 kb upstream from the *NEXN* (nexilin F actin binding protein). This gene may function in regulating cell migration through its association with the actin cytoskeleton and is abundant in the heart and skeletal muscle. Mutations in this gene have been associated with dilated cardiomyopathy<sup>90</sup> and hypertrophic cardiomyopathy.<sup>91</sup> The lead marker is 463 kb upstream of *GIPC2* (GIPC PDZ domain containing family, member 2). GIPC genes may play an important role in the early stages of growth and development and in tumor cell proliferation through the interaction of several growth factor proteins, including IGF1.<sup>92,93</sup>

## B. Detailed Methods Description

### Study design

We conducted a two-stage study for the tails of three anthropometric traits (BMI, WHR, and height) and four clinical classes of obesity (overweight and obesity classes I,II, and II). Stage 1 consisted of a meta-analysis of GWAS utilizing data on up to 168,267 individuals of European ancestry from 51 studies participating in the Genetic Investigation of ANthropometric Traits (GIANT) consortium. In stage 2, 273 SNPs with  $P$ -values  $< 5 \times 10^{-6}$  were followed up in up to additional 109,703 individuals of European descent, which included 67,243 individuals from 24 studies with data from the MetaboChip, and 42,460 additional individuals from 12 studies with *in silico* replication GWAS data. This gave us a study base (or sampling frame) of up to 276,007 individuals of European descent for the joint analysis of stage 1 and stage 2.

### Stage 1 – GWA meta-analysis

#### *Samples and genotyping*

A total of 51 studies from the GIANT consortium contributed to stage 1 with genotype data from study bases of up to 158,864 (BMI), 168,267 (height), and 100,605 (WHR) adult individuals of European ancestry (**Supplementary Tables 1-5**). The total number of cases and controls for each phenotype is given in **Supplementary Table 1**. Samples from these studies were genotyped using Affymetrix or Illumina whole genome genotyping arrays (**Supplementary Table 3**). After applying appropriate quality control metrics, each study then imputed the ~2.8 million polymorphic autosomal SNPs in the HapMap European CEU population using MACH,<sup>94</sup> IMPUTE,<sup>95</sup> or BimBam.<sup>96</sup>

#### *Phenotype definition*

The tails of the three anthropometric traits (i.e., BMI, height, and WHR) were defined as the upper 5<sup>th</sup> percentile (cases) and lower 5<sup>th</sup> percentile (controls) of the distribution stratified by sex and disease status after controlling for the following covariates: age, age<sup>2</sup> and principal components for BMI; age and principal components for height, and age, age<sup>2</sup>, BMI and principal components for WHR. For the clinical obesity classes, cases were defined as BMI  $\geq 25$  kg/m<sup>2</sup> for overweight, BMI  $\geq 30$  kg/m<sup>2</sup> for obesity class I, BMI  $\geq 35$  kg/m<sup>2</sup> for obesity class II, and BMI  $\geq 40$  kg/m<sup>2</sup> for obesity class 3. Controls were subjects with BMI  $< 25$  kg/m<sup>2</sup>. A minimum of 30 cases and 30 controls for each study-specific stratum was required.

### *Association analysis of tails of BMI, height and WHR and clinical classes of obesity*

Each study conducted a single marker association analysis assuming an additive genetic model taking the genotype imputation uncertainty into account utilizing either MACH2DAT (Y. Li, C.J. Willer, J. Ding, and G.R. Abecasis, unpublished data), Merlin,<sup>97</sup> SNPTEST,<sup>95</sup> PLINK,<sup>98</sup> ProbABEL,<sup>99</sup> GenABEL,<sup>100</sup> or LME in R. Analyses were stratified by sex (except for studies with related individuals) and disease status for studies that ascertained participants based on a relevant disease (e.g., diabetes). To allow for relatedness, in deCODE, Erasmus Rucphen Family, Family Heart Study, Framingham Heart Study, Essen Obesity study, Swedish Twin Registry, TWINGENE, and TwinsUK, regression coefficients were estimated in the context of a variance component model that modeled the relatedness in men and women combined with sex as a covariate. Before meta-analyzing the data, results from each study were extensively reviewed using standardized quality control procedures to identify potential problems, such as strand issues, discrepancies between the reported standard errors and p-values, and allele frequency differences. SNPs with poor imputation quality scores (e.g.,  $r^2 < 0.3$  for MACH, observed/expected ratio  $< 0.3$  for BimBam, proper info  $< 0.4$  for IMPUTE, and information  $< 0.8$  for PLINK) or estimated minor allele count  $\leq 20$  (i.e.  $2 \times N \times$  minor allele frequency) in each stratum (men/women or pooled for family-based studies) of each study were removed from analysis. Each stratum- and study-specific GWAS was corrected for genomic control; the average study-specific genomic control values were 1.033 for tails of BMI, 1.052 for tails of height, 1.018 for tails of WHR, 1.019 for overweight, 1.029 for obesity class I, 1.031 for obesity class II, and 1.018 for obesity class III.

### *Meta-analysis of stage 1 association results*

For stage 1, a meta-analysis was performed for each phenotype using METAL<sup>101</sup> and the fixed effects inverse variance method based on the  $\beta$  estimates and standard errors from each GWAS. Results were similar using the weighted z-score method. The results of the inverse variance meta-analysis were followed by an additional genomic control correction. Before correction, the median genomic control values were 1.151 for tails of BMI, 1.169 for tails of height, 0.986 for tails of WHR, 1.253 for overweight, 1.275 for obesity class I, 1.142 for obesity class II, and 1.043 for obesity class III.



### *Selection of SNPs for follow-up*

For each phenotype, the most strongly associated SNPs ( $P < 5 \times 10^{-6}$ ) from each locus after filtering using an  $r^2 < 0.1$  were taken forward for replication. A total of 237 SNPs, with 70 SNPs selected for more than one trait, were selected for replication. This included 17 SNPs for tails of BMI, 134 for tails of height, 10 for tails of WHR, 37 for overweight, 59 for obesity class I, 37 for obesity class II and 13 for obesity class III.

## **Stage 2 – Follow-up**

### *Samples and genotyping*

A total of 12 studies with *in silico* GWAS data from study bases of up to 42,460 (BMI), 41,565 (Height), and 28,897 (WHR) subjects of European ancestry and 24 studies with MetaboChip data from study bases of up to 67,246 (BMI), 66,177 (Height), and 46,323 (WHR) subjects of European ancestry were included in stage 2 (**Supplemental Tables 1-5**). The total number of cases and controls for each phenotype is given in **Supplementary Table 1**. For the 12 studies providing *in silico* GWAS data, samples were genotyped using Affymetrix or Illumina whole genome platforms, and the ~2.8 million polymorphic autosomal SNPs in the HapMap European CEU population were imputed using MACH,<sup>94</sup> IMPUTE,<sup>95</sup> or BimBam.<sup>96</sup> Twenty-four studies provided genotype data from a custom iSelect MetaboChip array, which was designed for a large-scale follow-up of putative associations for metabolic and cardiovascular traits and contains approximately 195K SNPs. Of the 273 SNPs selected for replication, 102 SNPs were directly genotyped on the chip and 113 SNPs had proxies ( $r^2 > 0.8$ ) that were genotyped on the MetaboChip.

### *Association analyses and meta-analysis*

As described for stage 1, each study tested the association between the replication SNPs and the relevant phenotypes stratified by sex and disease status. The inverse variance method was used to meta-analyze the results separately for the *in silico* GWAS studies and the MetaboChip studies. For the studies with MetaboChip data, a genomic control correction was estimated and applied to each study using SNPs unrelated to anthropometric traits. The results of the MetaboChip meta-analysis were followed by an additional genomic control correction using the same unrelated SNPs. Before correction, the median genomic control values were 0.994 for tails of BMI, 1.087 for tails of height, 0.980 for tails of WHR, 1.021 for overweight, 1.025 for obesity

class I, 1.022 for obesity class II, 0.979 for obesity class III. The meta-analysis results from the *in silico* GWAS studies and MetaboChip studies were then meta-analyzed together (stage 2) and jointly with the stage 1 meta-analysis (stage3). In the final stage, only SNPs separated by at least 1 Mb were considered independent, and loci were only considered novel if located at least 1 Mb from any previously established locus for that trait.

### **Conditional analyses of secondary signals within loci**

To identify potential secondary signals, we utilized the approximate conditional and joint analysis proposed by Yang et al,<sup>102</sup> which uses summary-level statistics and the LD structure from a reference sample to approximate conditional p-values. The meta-analysis results for each trait were analyzed separately with LD correction between SNPs estimated from 6,654 unrelated individuals from the ARIC cohort.

### **Effects in samples of clinically extreme obese individuals**

We tested the association of 91 SNPs (10 SNPs for tails of BMI, 25 for overweight, 33 for obesity class I, 22 for obesity class II and 1 for obesity class III) reaching  $P < 5 \times 10^{-8}$  in the joint analysis of stage 1 and stage 2 results, in five studies of clinically extreme obese individuals (**Supplementary Tables 2-5**). In four case-control studies (French Extreme Obesity Study, Essen Obesity Study [Essen Case-Control GWAS], GEO-IT and GOYA), the fixed effects inverse variance method was used to meta-analyze the results, similarly to what previously done for stage 1 and 2 meta-analyses. To further increase our power, we included a fifth study (Essen Obesity Study [Essen Obesity Trio GWAS]) that has a nuclear family structure and includes obese offspring and biological parents. To analyze the four case-control studies and the nuclear family study together, we used the weighted z-score method taking into account the direction but not the magnitude of the effect.

### **Association analyses with metabolic traits**

The effects of the trait-raising alleles on anthropometric traits from the overall distribution, lipids, blood pressure, and glucose- and insulin-related traits were investigated using data from the overall distributions of BMI, height, waist and hip circumference from the GIANT consortium (available at <http://www.broadinstitute.org/collaboration/giant/index.php/>)

GIANT\_consortium),<sup>40,103,104</sup> Global Lipids Genetics Consortium (GLGC; available at <http://www.sph.umich.edu/csg/abecasis/public/lipids2010/>),<sup>53</sup> International Consortium for Blood Pressure (ICBP; available at <http://www.igm.jhmi.edu/~gehret/icbp32413ahsfd134/>),<sup>105</sup> and Meta-Analyses of Glucose and Insulin-related traits Consortium (MAGIC; available at <ftp.sanger.ac.uk/pub/magic/>).<sup>106,107</sup>

### **Functional variants**

We extracted SNPs from either HapMap (version 2, CEU) or 1000G pilot 1 that were in LD with the index SNP ( $R^2 > 0.7$ ) and within 500kb of our best associating variant using SNAP.<sup>2</sup> We then used Annovar<sup>108</sup> to annotate these variants for functional effects based on RefSeq annotations. When an identical change was found both in HapMap and 1000G, we noted only the 1000G output. Otherwise, results from both datasets are noted. Only effects on the longest transcript were noted.

### **eQTL analyses**

To evaluate functional implications, we examined the *cis* associations between each of the 165 SNPs that reached genome-wide significance ( $P < 5 \times 10^{-8}$ ) and expression of nearby genes in adipose tissue, whole blood, lymphocytes, liver, and brain (cortical tissue). SNPs were tested for *cis* associations with transcripts within a 1 Mb region, assuming an additive effect of the BMI allele or using an ANOVA test. For reporting, p-value thresholds correspond to a false discovery rate of 1% for the lymphocytes and 5% for the remaining tissues were utilized. Conditional analyses were performed by conditioning the trait-associated SNP on the most significant *cis*-associated SNP for that particular gene transcript and vice versa. Conditional analyses were performed for all expression data, except for the cortical tissue sample because of low statistical power.

*Subcutaneous adipose tissue and whole blood from deCode:* As described previously,<sup>109</sup> 603 individuals from Iceland with adipose tissue and 747 individuals with whole blood samples were genotyped with the Illumina 317K or 370K platform with subsequent imputation based on the HapMap CEU population. Using RNA from the adipose and blood samples, gene expression profiles were conducted by hybridizing the RNA to a custom-made human array containing 23,720 unique oligonucleotide probes. *Cis* associations were tested by regressing the mean

logarithm (log<sub>10</sub>) expression ratio (MLR) on the number of effect alleles adjusting for age, sex and age x sex, and the differential cell count for the blood analyses and accounting for familial relatedness. Only *cis* associations with a p-value < 1x10<sup>-5</sup> corresponding to a false discovery rate <5% are reported.

*Lymphoblastoid cell lines from a childhood asthma study:* In brief, peripheral blood lymphocytes were transformed into lymphoblastoid cell lines for 830 parents and offspring from 206 families of European descent.<sup>110</sup> Using extracted RNA from these cell lines, gene expression was assessed with the Affymetrix HG-U133 Plus 2.0 chip, which contains 54,675 transcripts, representing 20,599 genes. Genotyping was conducted using the Illumina Human1M Beadchip and Illumina HumanHap300K Beadchip, and imputation performed using the HapMap CEU population. *Cis* associations (defined as genes within 1 Mb of the SNP) were tested, assuming an additive genetic model and adjusting for non-genetic effects in the gene expression value. Only *cis* associations that reached a  $P < 6.8 \times 10^{-5}$  corresponding to a false discovery rate of 1% are reported.

*Liver and subcutaneous and omental fat tissue from bariatric surgery:* As described previously,<sup>111</sup> liver (n=707), subcutaneous (n=870) and omental (n=916) fat tissue were obtained from patients who underwent bariatric surgery. RNA from these tissues was extracted and hybridized to a custom Agilent 44,000 feature microarray composed of 39,280 oligonucleotide probes targeting transcripts representing 34,266 known and predicted genes. All patients were genotyped on the Illumina 650Y SNP genotyping arrays. Gene expression data was adjusted for age, race, gender, and surgery year using linear regression, and *cis* associations with each SNPs were tested. A Bonferroni-correct p-value cutoff of  $1 \times 10^{-5}$  (0.05/5313 transcripts) was denoted as statistically significant.

*Subcutaneous adipose tissue, gluteal adipose tissue, and whole blood from MolOBB:* As described previously,<sup>112</sup> 73 individuals donated subcutaneous adipose tissue from the abdominal wall and gluteus. Total RNA from these tissues was hybridized onto the Affymetrix Human Genome U133 Plus 2.0 gene-expression microarray (hgu133plus2 array), containing 17,726 non-overlapping probes. Subjects were genotyped with the Illumina 317K Beadchip chip array and imputation conducted using IMPUTE. After quality control filters were applied to the expression and genotype data, 52 individuals with abdominal adipose tissue, 62 subjects with gluteal fat, and 65 subjects with whole blood remained for expression analysis. *Cis* associations

within 500kb on either side of the gene were evaluated by regressing expression level on genotype and adjusting for sex and plate effects. A false discovery rate filter was applied,<sup>113</sup> and only those associations with a false discovery rate <5% are presented.

*Brain tissue:* In brief, DNA and RNA of neuropathologically normal cortical brain samples of 193 individuals (mean age 81 years, range 65-100 years) of European descent were isolated.<sup>114</sup> DNA was genotyped using the Affymetrix Gene-Chip Human Mapping 500K Array Set and genotypes were imputed using the data from the Phase II HapMap CEU population. RNA expression was evaluated using the Illumina Human Refseq-8 Expression BeadChip system. *Cis* association analyses assumed an additive model and were adjusted for sex and age at death. A Bonferroni-corrected p-value threshold of 0.0003 was assumed.

### **Systematic comparisons of the tails and overall distributions of anthropometric traits from the general population**

The goal of these analyses was to determine if the observed genetic effects in the tails of distributions of anthropometric traits are different from what we could infer from the overall distributions. To examine the same underlying population, we included all GWAS studies that provided genome-wide results both for the overall trait (e.g. BMI) and for the tails (e.g. tails of BMI) of the distribution. The analyses were done separately for BMI, height and WHRadjBMI.

#### *Calculation of expected association with the tails of the distributions*

First, assuming Hardy-Weinberg Equilibrium, we used the minor allele frequencies and the number of analyzed individuals to calculate the number of subjects with each genotype (AA, Aa, aa). Second, we assumed the overall trait to be normally distributed and calculated the expected number of subjects in the upper and lower 5% tails. Third, we used the beta for association between the overall trait and the genotype frequency to calculate, for each genotype, the expected number of individuals in the upper and lower 5% tails. Therefore, for each SNP, we obtained six values, one for each genotype in the lower and upper tail. We used these values to perform a logistic regression, comparing the upper and lower tail, and obtained the ‘expected beta’ and ‘expected standard error’.

### *Testing of the differences between ‘expected betas’ and ‘observed betas’*

We compared the ‘expected betas’ described above with the ‘observed betas’ obtained from the actual analyses of the tails of the distributions. To test the differences between these two quantities, we needed both the variability (‘expected standard error’ and ‘observed standard error’) and the correlation. The latter quantity was not available from the summary results and can only be estimated through bootstrapping of individual level data. We therefore used 10,000 random SNPs from TwinGene, one of the largest studies with individual level data available to us, to estimate the median correlation between ‘expected betas’ and ‘observed betas’. This was estimated to be equal to 0.65. We performed sensitivity analyses varying this correlation coefficient, and found the value estimated from TwinGene to be appropriate in explaining the correlation in the studies used in the actual analyses. Finally, for each SNP, we tested: (‘expected beta’ - ‘observed beta’), where the standard error of the differences was estimated as:  $\sqrt{\text{expected standard error}^2 + \text{observed standard error}^2 - 2 \cdot 0.65 \cdot (\text{expected standard error} \cdot \text{observed standard error})}$ .

### *Meta-analysis of the differences between ‘expected betas’ and ‘observed betas’*

Differences between ‘expected betas’ and ‘observed betas’ were meta-analyzed using the inverse variance method in METAL. We applied a minor allele count cut-off of 10 in each individual study, and excluded all SNPs that were analyzed in less than half of the maximum sample size from the meta-analysis results. We plotted the q-q plots from the meta-analysis results for BMI, height and WHRadjBMI in **Figure 1** and **Supplementary Figure 10**, respectively.

### **Comparisons of genetic determinants of overall BMI and tails of BMI from the general population with clinically extremely obese using a polygene approach**

For these analyses, we included all GWAS studies that provided genome-wide results both for overall BMI and BMI tails to examine the same underlying population. In these studies, we ran two meta-analyses, one with tails of BMI as outcome (defined as 0-5<sup>th</sup> vs. 95-100<sup>th</sup> percentile), and one with overall BMI as outcome. From the results of these meta-analyses, we excluded SNPs with low N (<50% than the max N observed). We pruned the remaining SNPs to be independent by using HapMap release 23 and the clumping procedure implemented in PLINK, with an LD-based threshold of  $R^2 \geq 0.05$ , and a physical distance of 1 Mb from the top hit. After the filtering and pruning, we included 124,196 (tails of BMI) and 207,361 (overall BMI) SNPs in

the creation of polygene scores as proposed by the International Schizophrenia Consortium.<sup>115</sup> The polygene scores were calculated in four samples of extremely obese (GOYA, GEO-IT, Essen Obesity Study and French Obesity Study; total N=14,153), and in two independent cohort studies (TwinGene and LifeLines) using the same definition of tails of BMI (0-5<sup>th</sup> vs. 95-100<sup>th</sup> percentile) as in the discovery analyses (**Supplementary Table 12**). In a polygene approach, instead of limiting the genetic score to genome-wide significant SNPs, the statistically significant threshold is gradually lowered to include more and more SNPs, acknowledging that even if most SNPs are false positives, their impact on the variance explained would be low or negligible, whereas the effect of true positives may be picked up as signals. To estimate the phenotypic variance explained, we fit logistic or linear regression models including age, sex, study-specific covariates and the polygene score as predictors, and tails of BMI or overall BMI as outcomes, in separate models. The phenotypic variance explained by the polygene score is defined as the difference in  $R^2$  (linear regression) or Nagelkerke  $R^2$  (logistic regression) between these models and a basic model including only age, sex and study-specific covariates as predictors. The Nagelkerke  $R^2$  obtained from the logistic regression with tails of BMI as outcome cannot be directly compared with the  $R^2$  from the linear regression with BMI as outcome. In the two population-based studies where the sampling fraction was known (TWINGENE and LifeLines), we made the  $R^2$  and Nagelkerke  $R^2$  comparable using the method suggested by Lee et al<sup>1</sup> that uses the sampling fraction (0.05) to recalibrate the Nagelkerke  $R^2$  to a liability scale (**Supplementary Table 13**).

### **Haplotype-based analyses**

We tested for association of the tails of of height, BMI and WHR with haplotypes across each established and novel locus for the traits in each study using GENE-BPM.<sup>115</sup> Analyses were performed separately for males and females. In these analyses, haplotypes were first re-constructed from unphased GWAS SNP data by means of an expectation-maximisation algorithm. These haplotypes are then clustered according to their similarity in terms of their allelic make-up. Within a logistic regression-modelling framework, haplotypes within the same cluster are assigned the same allelic effect, reducing the required number of parameters. Markov-chain Monte Carlo techniques are employed to sample over the space of haplotype clusters and regression model parameters. Evidence in favour of association of haplotypes with each trait

within each study is assessed by means of a Bayes factor. Within each study, we also obtain estimates of population haplotype frequencies, together with posterior mean and standard deviation of haplotype log-odds ratios. In addition, we obtain an approximation to the posterior probability that each pair of haplotypes appear in the same cluster. Association evidence across studies was combined by summing  $\log_{10}$  Bayes factors.



## **C. Full List of Acknowledgements**

### **Stage 1 – Genome-wide association studies**

**ADVANCE** - The ADVANCE study was supported by a grant from the Reynold's Foundation and NHLBI grant HL087647.

**AGES** - The Age, Gene/Environment Susceptibility Reykjavik Study has been funded by NIH contract N01-AG-12100, the NIA Intramural Research Program, Hjartavernd (the Icelandic Heart Association), and the Althingi (the Icelandic Parliament). The study is approved by the Icelandic National Bioethics Committee, (VSN: 00-063) and the Data Protection Authority. The researchers are indebted to the participants for their willingness to participate in the study.

**ARIC** - The Atherosclerosis Risk in Communities Study is carried out as a collaborative study supported by National Heart, Lung, and Blood Institute contracts (HHSN268201100005C, HHSN268201100006C, HHSN268201100007C, HHSN268201100008C, HHSN268201100009C, HHSN268201100010C, HHSN268201100011C, and HHSN268201100012C), R01HL087641, R01HL59367 and R01HL086694; National Human Genome Research Institute contract U01HG004402; and National Institutes of Health contract HHSN268200625226C. The authors thank the staff and participants of the ARIC study for their important contributions. Infrastructure was partly supported by Grant Number UL1RR025005, a component of the National Institutes of Health and NIH Roadmap for Medical Research.

**BHS** - The Busselton Health Study acknowledges the generous support for the 1994/5 follow-up study from Healthway, Western Australia and the numerous Busselton community volunteers who assisted with data collection and the study participants from the Shire of Busselton. The Busselton Health Study is supported by The Great Wine Estates of the Margaret River region of Western Australia. The BHS gratefully acknowledges the assistance of the Western Australian DNA Bank (NHMRC Enabling Facility) with DNA samples and the support provided by the Ark (NHMRC Enabling Facility) for this study.

**BRIGHT** - The BRIGHT study is supported by the Medical Research Council of Great Britain (G9521010D) and the British Heart Foundation (PG/02/128). This work was facilitated by the forms part of the research themes contributing to the translational research portfolio National Institute for Health Biomedical Research Unit at Barts. The BRIGHT study is extremely grateful to all the patients who participated in the study and the BRIGHT nursing team.

**B58C (all subsets) WTCCC/T1DGC/REPL** - We acknowledge use of phenotype and genotype data from the British 1958 Birth Cohort DNA collection, funded by the Medical Research Council grant G0000934 and the Wellcome Trust grant 068545/Z/02. (<http://www.b58cgene.sgul.ac.uk/>). Genotyping for the B58C-WTCCC subset was funded by the Wellcome Trust grant 076113/B/04/Z. The B58C-T1DGC genotyping utilized resources provided by the Type 1 Diabetes Genetics Consortium, a collaborative clinical study sponsored by the National Institute of Diabetes and Digestive and Kidney Diseases (NIDDK), National Institute of Allergy and Infectious Diseases (NIAID), National Human Genome Research Institute (NHGRI), National Institute of Child Health and Human Development (NICHD), and Juvenile Diabetes Research Foundation International (JDRF) and supported by U01 DK062418. B58C-T1DGC GWAS data were deposited by the Diabetes and Inflammation Laboratory, Cambridge Institute for Medical Research (CIMR), University of Cambridge, which is funded by Juvenile Diabetes Research Foundation International, the Wellcome Trust and the National Institute for Health Research Cambridge Biomedical Research Centre; the CIMR is in receipt of a Wellcome Trust Strategic Award (079895). Some of the B58C-REPL genotyping was supported by a contract from the European Commission Framework Programme 6 (018996) and grants from the French Ministry of Research.

**CAD WTCCC (WTCCC Coronary Artery Disease cases)** - Collection of the CAD-WTCCC cases (BHF Family Heart Study) was funded by the British Heart Foundation and the Medical Research Council and genotyping by the Wellcome Trust as part of the WTCCC. We thank the members of the BHF Family Heart Study Research Group for recruitment. NJS hold a Chair supported by the British Heart Foundation and is an NIHR Senior Investigator.

**CAPS 1 & 2** - The CAPS study was supported by grants from the Swedish Research Council, the Swedish Cancer Society, and the National Cancer Institute. E.I. was supported by grants from the Swedish Research Council, the Swedish Heart-Lung Foundation, the Swedish Society of Medicine, the Swedish Foundation for Strategic Research, and the Royal Swedish Academy of Science while working with this article.

**CHS** - Cardiovascular Health Study: This CHS research was supported by NHLBI contracts N01-HC-85239, N01-HC-85079 through N01-HC-85086; N01-HC-35129, N01 HC-15103, N01 HC-55222, N01-HC-75150, N01-HC-45133, HHSN268201200036C and NHLBI grants HL080295, HL087652, HL105756 with additional contribution from NINDS. Additional support

was provided through AG-023629, AG-15928, AG-20098, AG-031890, and AG-027058 from the NIA. See also <http://www.chs-nhlbi.org/pi.htm>. DNA handling and genotyping at Cedars-Sinai Medical Center was supported in part by the National Center for Research Resources grant UL1RR033176, and is now at the National Center for Advancing Translational Sciences, CTSI grant UL1TR000124; in addition to the National Institute of Diabetes and Digestive and Kidney Disease grant DK063491 to the Southern California Diabetes Endocrinology Research Center.

**COLAUS** - The CoLaus study received financial contributions from GlaxoSmithKline, the Faculty of Biology and Medicine of Lausanne, and the Swiss National Science Foundation (33CSCO-122661). The authors thank Dawn Waterworth, Co-PI of the CoLaus study. Special thanks to Sven Bergmann, Jacques Beckmann, Murielle Bochud, Yolande Barreau, Mathieu Firmann, Vladimir Mayor, Anne-Lise Bastian, Binasa Ramic, Martine Moranville, Martine Baumer, Marcy Sagette, Jeanne Ecoffey and Sylvie Mermoud for data collection. VM is a part-time employee of the GlaxoSmithKline.

**COROGENE** - The study was supported in part by the Aarno Koskelo Foundation, the Finnish Foundation for Cardiovascular Research, and the EVO funds of Helsinki University Central Hospital. The Corogene study is not supported by industry and all presentations have been carried out in academic environment.

**CROATIA-VIS** - The CROATIA-Vis study was funded by grants from the Medical Research Council (UK), European Commission Framework 6 project EUROSPAN (Contract No. LSHG-CT-2006-018947) and Republic of Croatia Ministry of Science, Education and Sports research grants. (108-1080315-0302). The funders had no role in study design, data collection and analysis, decision to publish, or preparation of the manuscript. We would like to acknowledge the staff of several institutions in Croatia that supported the field work, including but not limited to The University of Split and Zagreb Medical Schools, Institute for Anthropological Research in Zagreb and Croatian Institute for Public Health. The SNP genotyping for the CROATIA-Vis cohort was performed in the core genotyping laboratory of the Wellcome Trust Clinical Research Facility at the Western General Hospital, Edinburgh, Scotland, UK.

**deCODE** - We would like to thank participants in deCODE cardiovascular- and obesity studies and collaborators for their cooperation. The research performed at deCODE Genetics was part funded through the European Community's Seventh Framework Programme (FP7/2007-2013), ENGAGE project, grant agreement HEALTH-F4-2007- 201413.

**DGI** - The Botnia (DGI) study have been supported by grants from Folkhälsan Research Foundation, Sigrid Juselius Foundation, Ministry of Education, Nordic Center of Excellence in Disease Genetics, Gyllenberg Foundation, Swedish Cultural Foundation in Finland, Finnish Diabetes Research Foundation, Foundation for Life and Health in Finland, Finnish Medical Society, Paavo Nurmi Foundation, Perklén Foundation, Ollqvist Foundation, Närpes Health Care Foundation, the Municipal Health Care Center and Hospital in Jakobstad, Health Care Centers in Vasa, Närpes and Korsholm. This work was also partially supported by NIH grant R01-DK075787 to JNH and March of Dimes grant 6-FY-09-507 to JNH.

**Estonian Genome Center of University of Tartu (EGCUT)** - EGCUT received financing by FP7 grants (201413, 245536), grant from Estonian Government SF0180142s08, from the EU through the European Regional Development Fund, OPENGENE, in the frame of Centre of Excellence in Genomics and Univ. of Tartu grant SP1GVARENG.

**EPIC** - The EPIC Norfolk Study is funded by Cancer Research United Kingdom and the Medical Research Council.

**ERF** - The genotyping for the ERF study was supported by EUROSPAN (European Special Populations Research Network) and the European Commission FP6 STRP grant (018947; LSHG-CT-2006-01947). The ERF study was further supported by grants from the Netherlands Organisation for Scientific Research, Erasmus MC, the Centre for Medical Systems Biology (CMSB) and the Netherlands Brain Foundation (HersenStichting Nederland). We are grateful to all patients and their relatives, general practitioners and neurologists for their contributions and to P. Veraart for her help in genealogy, Jeannette Vergeer for the supervision of the laboratory work and P. Snijders for his help in data collection. We would also like to acknowledge Internationale Stichting Alzheimer Onderzoek (ISAO) and Hersenstichting Netherlands.

**FamHS** - The Family Heart Study (FamHS) was supported by NIH grants R01-HL-087700 and R01-HL-088215 (Michael A. Province, PI) from NHLBI; and R01-DK-8925601 and R01-DK-075681 (Ingrid B. Borecki, PI) from NIDDK.

**FENLAND** - The Fenland Study is funded by the Wellcome Trust and the Medical Research Council, as well as by the Support for Science Funding programme and CamStrad. We are grateful to all the volunteers for their time and help, and to the General Practitioners and practice staff for help with recruitment. We thank the Fenland Study co-ordination team and the Field Epidemiology team of the MRC Epidemiology Unit for recruitment and clinical testing.

**FRAM** - This research was conducted in part using data and resources from the Framingham Heart Study of the National Heart Lung and Blood Institute of the National Institutes of Health and Boston University School of Medicine. The analyses reflect intellectual input and resource development from the Framingham Heart Study investigators participating in the SNP Health Association Resource (SHARe) project. This work was partially supported by the National Heart, Lung and Blood Institute's Framingham Heart Study (Contract No. N01-HC-25195) and its contract with Affymetrix, Inc for genotyping services (Contract No. N02-HL-6-4278). A portion of this research utilized the Linux Cluster for Genetic Analysis (LinGA-II) funded by the Robert Dawson Evans Endowment of the Department of Medicine at Boston University School of Medicine and Boston Medical Center.

**FUSION** - Support for FUSION was provided by NIH grants R01-DK062370 (to M.B.), R01-DK072193 (to K.L.M.), and intramural project number 1Z01-HG000024 (to F.S.C.). Genome-wide genotyping was conducted by the Johns Hopkins University Genetic Resources Core Facility SNP Center at the Center for Inherited Disease Research (CIDR), with support from CIDR NIH contract no. N01-HG-65403.

**Genmets** - Genmets was supported through funds from The European Community's Seventh Framework Programme (FP7/2007-2013), BioSHaRE Consortium, grant agreement 261433. V.S. was supported by the Sigrid Juselius Foundation, Finnish Foundation for Cardiovascular research, and the Finnish Academy (grant number 129494). S.R. was supported by the Academy of Finland Center of Excellence in Complex Disease Genetics (213506 and 129680), Academy of Finland (251217), the Finnish foundation for Cardiovascular Research and the Sigrid Juselius Foundation.

**GerMIFS1+2** - GerMIFS1, GerMIFS2: Supported by the Deutsche Forschungsgemeinschaft and the German Federal Ministry of Education and Research (BMBF) in the context of the German National Genome Research Network (NGFN-2 and NGFN-plus), the FP6 and FP7 EU funded integrated projects Cardiogenics (LSHM-CT-2006-037593), ENGAGE (201413), the bi-national BMBF/ANR funded project CARDomics (01KU0908A), and the Nordic Center of Cardiovascular Research (NCCR).

**GOOD** - Financial support was received from the Swedish Research Council (K2010-54X-09894-19-3, 2006-3832 and K2010-52X-20229-05-3), the Swedish Foundation for Strategic Research, the ALF/LUA research grant in Gothenburg, the Lundberg Foundation, the Torsten

and Ragnar Söderberg's Foundation, Petrus and Augusta Hedlunds Foundation, the Västra Götaland Foundation, the Göteborg Medical Society, the Novo Nordisk foundation, the Sahlgrenska Center for Cardiovascular and Metabolic Research (CMR, no. A305:188), which is supported by the Swedish Foundation for Strategic Research, and the European Commission grant HEALTH-F2-2008-201865-GEFOS. We would like to acknowledge Maria Nethander at the Genomics core facility at the University of Gothenburg for statistical analyses. We would like to thank Dr. Tobias A. Knoch, Luc V. de Zeeuw, Anis Abuseiris, and Rob de Graaf as well as their institutions the Erasmus Computing Grid, Rotterdam, The Netherlands, and especially the national German MediGRID and Services@MediGRID part of the German D-Grid, both funded by the German Bundesministerium fuer Forschung und Technology under grants #01 AK 803 A-H and # 01 IG 07015 G for access to their grid resources. We would also like to thank Karol Estrada, Department of Internal Medicine, Erasmus MC, Rotterdam, Netherlands for advice regarding the grid resources.

**HBCS** - Helsinki Birth Cohort Study has been supported by grants from the Academy of Finland (Grant No. 120386 and 125876 to JGE), the Finnish Diabetes Research Society, Folkhälsan Research Foundation, Novo Nordisk Foundation, Finska Läkaresällskapet, the European Science Foundation (EuroSTRESS), the Wellcome Trust (Grant No. 89061/Z/09/Z and 089062/Z/09/Z), Samfundet Folkhälsan, Finska Läkaresällskapet and the Signe and Ane Gyllenberg foundation. We thank all study participants as well as everybody involved in the Helsinki Birth Cohort Study.

**KORA S3 and S4** - The KORA Augsburg studies were financed by the Helmholtz Zentrum München, German Research Center for Environmental Health, Neuherberg, Germany and supported by grants from the German Federal Ministry of Education and Research (BMBF). Part of this work was financed by the German National Genome Research Network (grant number NGFNPLUS 01GS023 and 01GS0834). Our research was supported within the Munich Center of Health Sciences (MC Health) as part of LMUinnovativ.

**MGS** - The Molecular Genetics of Schizophrenia project was carried out by 10 research sites and PIs: Pablo V. Gejman, Study Coordinator (Department of Psychiatry and Behavioral Sciences, NorthShore University HealthSystem, Evanston, IL, and Department of Psychiatry and Behavioral Sciences, University of Chicago, Chicago, IL), Douglas F. Levinson (Stanford University), Bryan J. Mowry (University of Queensland), Donald Black (University of Iowa),

Robert Freedman (University of Colorado), C. Robert Cloninger (Washington University), Jeremy Silverman (Mt. Sinai Medical School), Nancy Buccola (Louisiana State University - New Orleans), William Byerley (University of California at San Francisco), and Farooq Amin (Emory University). This study was supported by NIH R01 grants (MH67257 to N.G.B., MH59588 to B.J.M., MH59571 to P.V.G., MH59565 to R.F., MH59587 to F.A., MH60870 to W.F.B., MH59566 to D.W.B., MH59586 to J.M.S., MH61675 to D.F.L., MH60879 to C.R.C., and MH81800 to P.V.G.), MH79469 to P.V.G., and MH79470 to D.F.L.), NARSAD (National Alliance for Research on Schizophrenia and Depression) Young Investigator Awards (to J.D. and A.R.S.), the Genetic Association Information Network (GAIN), the Walter E. Nichols, M.D., and Eleanor Nichols endowments, at Stanford University, and by The Paul Michael Donovan Charitable Foundation. Genotyping was carried out by the Genotyping and Analysis at the Broad Institute of Harvard and MIT (S. Gabriel and D.B.M.), which is supported by grant U54 RR020278 from the National Center for Research Resources. Genotyping of half of the control sample presented here was carried out with support from GAIN. The GAIN quality control team (G.R. Abecasis and J. Paschall) made important contributions to the project.

**MICROS** - For the MICROS study, we thank the primary care practitioners in the villages of the Val Venosta and the personnel of the Hospital of Silandro (Department of Laboratory Medicine) for their participation and collaboration in the research project. In South Tyrol, the study was supported by the Ministry of Health and Department of Educational Assistance, University and Research of the Autonomous Province of Bolzano, and the South Tyrolean Sparkasse Foundation.

**MIGEN** - The MIGen study was supported by the National Heart, Lung, and Blood Institute's STAMPEED genomics research program (R01 HL087676) and the National Center for Research Resources (U54 RR020278). This work was also partially supported by NIH grant K23-DK080145 to EKS, NIH grant R01-DK075787 to JNH and March of Dimes grant 6-FY-09-507 to JNH.

**NHS** - This study was supported by grants HL71981, CA65725, CA87969, CA49449, CA67262, CA50385 and 5UO1CA098233 from the National Institutes of Health. Dr. Lu Qi is a recipient of the American Heart Association Scientist Development Award (0730094N)

**NSPHS** - The Northern Swedish Population Health Study (NSPHS) was funded by the Swedish Medical Research Council (project number K2007-66X-20270-01-3), and the Foundation for

Strategic Research (SSF). The NSPHS as part of EUROSPAN (European Special Populations Research Network) was also supported by European Commission FP6 STRP grant number 01947 (LSHG-CT-2006-01947). This work was also supported by the Swedish Society for Medical Research (ÅJ). The authors are grateful for the contribution of district nurse Svea Hennix for data collection and Inger Jonasson for logistics and coordination of the health survey. Finally, the authors thank all the community participants for their interest and willingness to contribute to the study.

**NTR and NESDA** - Funding was obtained from the Netherlands Organization for Scientific Research (NWO: MagW/ZonMW): Genetic basis of anxiety and depression (904-61-090); Genetics of individual differences in smoking initiation and persistence (NWO 985-10-002); Resolving cause and effect in the association between exercise and well-being (904-61-193); Twin family database for behavior genomics studies (480-04-004); Twin research focusing on behavior (400-05-717); Genetic determinants of risk behavior in relation to alcohol use and alcohol use disorder (Addiction-31160008); Genotype/phenotype database for behavior genetic and genetic epidemiological studies (40-0056-98-9032); Spinozapremie (SPI 56-464-14192); CMSB: Center for Medical Systems Biology (NWO Genomics); NBIC/BioAssist/RK/2008.024); BBMRI –NL: Biobanking and Biomolecular Resources Research Infrastructure (184.021.007); the VU University: Institute for Health and Care Research (EMGO+ ) and Neuroscience Campus Amsterdam (NCA); the European Science Foundation (ESF): Genomewide analyses of European twin and population cohorts (EU/QLRT-2001-01254); European Community's Seventh Framework Program (FP7/2007-2013): ENGAGE (HEALTH-F4-2007-201413); the European Research Council (ERC) Genetics of Mental Illness (230374); Rutgers University Cell and DNA Repository cooperative agreement (NIMH U24 MH068457-06); Collaborative study of the genetics of DZ twinning (NIH R01D0042157-01A); National Institute of Mental Health (NIMH; 1RC2 MH089951-01 and 1RC2MH089995-01); the Genetic Association Information Network, a public–private partnership between the NIH and Pfizer Inc., Affymetrix Inc. and Abbott Laboratories.

**PLCO** - The Prostate, Lung, Colorectal, and Ovarian (PLCO) Cancer Screening Trial was funded by the Intramural Research Program of the Division of Cancer Epidemiology and Genetics, National Cancer Institute, NIH



**PROCARDIS** - European Commission (LSHM-CT-2007-037273), the Swedish Heart-Lung Foundation, the Swedish Research Council (8691), the Knut and Alice Wallenberg Foundation, the Foundation for Strategic Research, the Torsten and Ragnar Söderberg Foundation, the Strategic Cardiovascular Programme of Karolinska Institutet and the Stockholm County Council, the Stockholm County Council (560183) and the Wellcome trust core award [090532/Z/09/Z]. Martin Farrall and Hugh Watkins acknowledge support from the British Heart Foundation Centre of Research Excellence, Oxford.

**RSI** - The generation and management of GWAS genotype data for the Rotterdam Study is supported by the Netherlands Organisation of Scientific Research NWO Investments (nr. 175.010.2005.011, 911-03-012). This study is funded by the Research Institute for Diseases in the Elderly (014-93-015; RIDE2), the Netherlands Genomics Initiative (NGI)/Netherlands Organisation for Scientific Research (NWO) project nr. 050-060-810. We thank Pascal Arp, Mila Jhamai, Marijn Verkerk, Lizbeth Herrera and Marjolein Peters for their help in creating the GWAS database, and Karol Estrada and Maksim V. Struchalin for their support in creation and analysis of imputed data. The Rotterdam Study is funded by Erasmus Medical Center and Erasmus University, Rotterdam, Netherlands Organization for the Health Research and Development (ZonMw), the Research Institute for Diseases in the Elderly (RIDE), the Ministry of Education, Culture and Science, the Ministry for Health, Welfare and Sports, the European Commission (DG XII), and the Municipality of Rotterdam. The authors are grateful to the study participants, the staff from the Rotterdam Study and the participating general practitioners and pharmacists.

**ORCADES** - ORCADES was supported by the Chief Scientist Office of the Scottish Government, the Royal Society, and the European Union framework program 6 European Special Populations Research Network project [contract LSHG-CT-2006-018947]. ORCADES would like to acknowledge the invaluable contributions of Lorraine Anderson, the research nurses in Orkney, and the administrative team in Edinburgh. DNA extraction for ORCADES was carried out by the Genetics Core Laboratory at the Wellcome Trust Clinical Research Facility, WGH, Edinburgh, Scotland and SNP genotyping was performed by Helmholtz Zentrum München, GmbH, Neuherberg, Germany.

**SardiNIA** - We thank all the volunteers who generously participated in this study, Monsignore Piseddu, Bishop of Ogliastra and the mayors and citizens of the Sardinian towns (Lanusei,

Ilbono, Arzana, and Elini). This work was supported by the Intramural Research Program of the National Institute on Aging (NIA), National Institutes of Health (NIH). The SardiNIA (“Progenia”) team was supported by Contract NO1-AG-1–2109 from the NIA; the efforts of GRA were supported in part by contract 263-MA-410953 from the NIA to the University of Michigan and by research grant HG002651 and HL084729 from the NIH (to GRA).

**SASBAC** - The SASBAC study was supported by funding from the Agency for Science, Technology and Research of Singapore (A\*STAR), the United States National Institute of Health (NIH) and the Susan G. Komen Breast Cancer Foundation.

**SEARCH** - Paul Pharoah, Douglas Easton, Simon Gayther and the SEARCH and UKOPS teams. SEARCH was funded by Cancer Research UK (C490/A10124 and C490/A8339).

**SHIP** - SHIP is part of the Community Medicine Research net of the University of Greifswald, Germany, which is funded by the Federal Ministry of Education and Research (grants no. 01ZZ9603, 01ZZ0103, and 01ZZ0403), the Ministry of Cultural Affairs as well as the Social Ministry of the Federal State of Mecklenburg-West Pomerania, and the network ‘Greifswald Approach to Individualized Medicine (GANI\_MED)’ funded by the Federal Ministry of Education and Research (grant 03IS2061A). Genome-wide data have been supported by the Federal Ministry of Education and Research (grant no. 03ZIK012) and a joint grant from Siemens Healthcare, Erlangen, Germany and the Federal State of Mecklenburg- West Pomerania. The University of Greifswald is a member of the ‘Center of Knowledge Interchange’ program of the Siemens AG and the Caché Campus program of the InterSystems GmbH.

**Sorbs** - This work was supported by grants from the Interdisciplinary Centre for Clinical Research at the University of Leipzig (B27 to AT, MS) from the German Diabetes Association (to AT), a Travel Grant from BIF (to AT) and by the DHFD, Diabetes Hilfs- und Forschungsfonds Deutschland (MS). We thank all those who participated in the study. Sincere thanks are given to Anke Tönjes who was significantly involved in the design and performing of the Sorbs study. We also thank Knut Krohn (Microarray Core Facility of the Interdisciplinary Centre for Clinical Research, University of Leipzig) for the genotyping support. Reedik Mägi acknowledges financial support from the European Commission under a Marie Curie Intra-European Fellowship. The research of Inga Prokopenko is funded in part through the European Community's Seventh Framework Programme (FP7/2007-2013), ENGAGE project, grant agreement HEALTH-F4-2007- 201413.

**TwinsUK** - The study was funded by the Wellcome Trust; European Community's Seventh Framework Programme (FP7/2007-2013)/grant agreement HEALTH-F2-2008-ENGAGE and the European Union FP-5 GenomEUtwin Project (QLG2-CT-2002-01254) and Framework 6 Project EUroClot. The study also receives support from the National Institute for Health Research (NIHR) comprehensive Biomedical Research Centre award to Guy's & St Thomas' NHS Foundation Trust in partnership with King's College London. We thank the staff from the TwinsUK, the DNA Collections and Genotyping Facilities at the Wellcome Trust Sanger Institute for sample preparation; Quality Control of the Twins UK cohort for genotyping (in particular Amy Chaney, Radhi Ravindrarajah, Douglas Simpkin, Cliff Hinds, and Thomas Dibling); Paul Martin and Simon Potter of the DNA and Genotyping Informatics teams for data handling; Le Centre National de Génotypage, France, led by Mark Lathrop, for genotyping; Duke University, North Carolina, USA, led by David Goldstein, for genotyping; and the Finnish Institute of Molecular Medicine, Finnish Genome Center, University of Helsinki, led by Aarno Palotie. Nicole Soranzo acknowledges financial support from the Wellcome Trust (Grant 091746/Z/10/Z).

**UKBS2** - We acknowledge use of DNA from The UK Blood Services collection of Common Controls (UKBS-CC collection), funded by the Wellcome Trust grant 084183/Z/07/Z and by NIHR programme grant to NHSBT (RP-PG-0310-1002). The collection was established as part of the Wellcome Trust Case Control Consortium (WTCCC). We acknowledge funding from the British Heart Foundation to Augusto Rendon grant RG/09/012 and NIHR funding through the Cambridge Biomedical Research Centre.

**WGHS** - The WGHS is supported by HL 043851 and HL69757 from the National Heart, Lung, and Blood Institute and CA 047988 from the National Cancer Institute, the Donald W. Reynolds Foundation and the Fondation Leducq, with collaborative scientific support and funding for genotyping provided by Amgen.

**WTCCC-T2D** - Research funding for sample collection, genotyping and data analysis for the T2D-WTCCC and other cohorts for which the Oxford group had responsibility came from the British Diabetes Association, BDA Research, Diabetes UK, Oxford NIHR Biomedical Research Centre, European Commission (ENGAGE: HEALTH-F4-2007-201413; EURO DIA: LSHG-CT-2004-518153, Wellcome Trust (072960, 076113/B/04/Z, 076113/K/04/Z, 083270, 085301, 079557, 081682, 075491) UK Medical Research Council (G0000649, G0601261) and NIDDK

(R01-DK-073490). In addition, Cecilia Lindgren is funded by WT086596/Z/08/Z (Wellcome Trust Research Career Development Fellowship); Reedik Mägi is funded by European Commission under the Marie Curie Intra-European Fellowship; and Mark McCarthy receives personal funding from the Oxford NIHR Biomedical Research Centre.

**YFS** - The Young Finns Study has been financially supported by the Academy of Finland: grants 126925, 121584, 124282, 129378 (Salve), 117787 (Gendi), and 41071 (Skidi), the Social Insurance Institution of Finland, Kuopio, Tampere and Turku University Hospital Medical Funds (grant 9M048 and 9N035 for TeLeht), Juho Vainio Foundation, Paavo Nurmi Foundation, Finnish Foundation of Cardiovascular Research and Finnish Cultural Foundation, Tampere Tuberculosis Foundation and Emil Aaltonen Foundation (T.L). The expert technical assistance in the statistical analyses by Irina Lisinen is gratefully acknowledged.

## **Stage 2 - Insilico replication**

**BHS** - The Busselton Health Study acknowledges the generous support for the 1994/5 follow-up study from Healthway, Western Australia and the numerous Busselton community volunteers who assisted with data collection and the study participants from the Shire of Busselton. The Busselton Health Study is supported by The Great Wine Estates of the Margaret River region of Western Australia. The BHS gratefully acknowledges the assistance of the Western Australian DNA Bank (NHMRC Enabling Facility) with DNA samples and the support provided by the Ark (NHMRC Enabling Facility) for this study.

**B58C (all subsets) WTCCC/T1DGC/REPL** - We acknowledge use of phenotype and genotype data from the British 1958 Birth Cohort DNA collection, funded by the Medical Research Council grant G0000934 and the Wellcome Trust grant 068545/Z/02.

(<http://www.b58cgene.sgul.ac.uk/>). Genotyping for the B58C-WTCCC subset was funded by the Wellcome Trust grant 076113/B/04/Z. The B58C-T1DGC genotyping utilized resources provided by the Type 1 Diabetes Genetics Consortium, a collaborative clinical study sponsored by the National Institute of Diabetes and Digestive and Kidney Diseases (NIDDK), National Institute of Allergy and Infectious Diseases (NIAID), National Human Genome Research Institute (NHGRI), National Institute of Child Health and Human Development (NICHD), and Juvenile Diabetes Research Foundation International (JDRF) and supported by U01 DK062418. B58C-T1DGC GWAS data were deposited by the Diabetes and Inflammation Laboratory,

Cambridge Institute for Medical Research (CIMR), University of Cambridge, which is funded by Juvenile Diabetes Research Foundation International, the Wellcome Trust and the National Institute for Health Research Cambridge Biomedical Research Centre; the CIMR is in receipt of a Wellcome Trust Strategic Award (079895). Some of the B58C-REPL genotyping was supported by a contract from the European Commission Framework Programme 6 (018996) and grants from the French Ministry of Research.

**Estonian Genome Center of University of Tartu (EGCUT)** - EGCUT received financing by FP7 grants (201413, 245536), grant from Estonian Government SF0180142s08, from the EU through the European Regional Development Fund, OPENGENE, in the frame of Centre of Excellence in Genomics and Univ. of Tartu grant SP1GVARENG.

**HYPERGENES** - funding: HYPERGENES (FP7 - HEALTH-F4-2007-201550); INTEROMICS (MIUR - CNR Italian Flagship Project). To HYPERGENES consortium took part: 1) University of Milano and Fondazione Filarete with Daniele Cusi, Project Coordinator, Cristina Barlassina, Erika Salvi, Sara Lupoli, Maurizio Marconi, Gianna Petrini, Vincenzo Toschi, Francesca Frau. 2) Katholieke Universiteit Leuven, with Jan Staessen, Jan Staessen, Tatiana Kuznetsova, Lutgarde Thijs. 3) Jagiellonian University Medical College, Krakow, with Kalina Kawecka-Jaszcz, Katarzyna Stolarz, Agnieszka Olszanecka, Wiktoria Wojciechowska. 4) IBM Israel – Science and Technology LTD, with Amnon Shabo, Ariel Frakash, Simona Cohen, Boaz Carmeli, Dan Pelleg, Michal Rosen-Zvi, Hani Neuvrith-Telem. 5) I.M.S. – Istituto di Management Sanitario S.r.l., Milan, with Pietro Conti, Costanza Conti, Mariella D’Alessio. 6) Institute of Internal Medicine, Siberian Branch of Russian Academy of Medical Sciences, Novosibirsk, with Yuri Nikitin, Sofia Malyutina, M. Voevoda, Andrew Ryabikov, E. Pello, Maxim Ryabikov. 7) Imperial College of Science, Technology and Medicine, with Paolo Vineis and Clive J Hoggart. 8) INSERM – Institut National de la Santé et de la Recherche Médicale U772, with Xavier Jeunemaitre, Pierre-François Plouin, Anne-Paule Gimenez-Roqueplo, Rosa Vargas-Poussou, Geneviève Beaurain. 9) University of Warwick. Cardiovascular Medicine & Epidemiology Group, Clinical Sciences Research Institute, with Francesco P Cappuccio, Michelle A Miller, Chen Ji. 10) Università degli Studi di Sassari. Hypertension and cardiovascular prevention centre, with Nicola Glorioso, Chiara Maria Troffa, Giuseppe Argiolas, Silvia Pitzoi. 11) STMICROELECTRONICS SRL, with Enrico Rosario Alessi. 12) Universite de Lausanne. Department of Medical Genetics, with Carlo Rivolta, Jacques S. Beckmann, Zoltan Kutalik,

Paola Benaglio. 13) Pharnext S.A.S., Paris, with Daniel Cohen and Ilya Chumakov. 14) Softeco Sismat Spa, Genova, with Stefano Bianchi. 15) Shanghai Institute of Hypertension, with Jiguang Wang and Li Yan. 16) Charles University in Prague. Department of Internal Medicine II, Pilsen, with Jan Filipovsky, Otto Mayer, Milan Hromadka, Jitka Seidlerova, Milena Dolejsova, Lukas Handl. 17) Università degli Studi di Padova. Department of Clinical and Experimental Medicine, with Edoardo Casiglia, Valerie Tikhonoff, Laura Schiavon, Anna Bascelli, Elisa Pagnin. 18) Medical University of Gdansk. Hypertension Unit, Department of Hypertension and Diabetology, with Krzysztof Narkiewicz, Marzena Chrostowska, Radoslaw Szczech, Michal Hoffmann. 19) University Vita-Salute San Raffaele, with Paolo Manunta, Chiara Lanzani, Maria Teresa Sciarrone, Lorena Citterio, Laura Zagato.

**LifeLines Cohort Study** - The LifeLines Cohort Study, and generation and management of GWAS genotype data for the LifeLines Cohort Study is supported by the Netherlands Organization of Scientific Research NWO (grant 175.010.2007.006), the Economic Structure Enhancing Fund (FES) of the Dutch government, the Ministry of Economic Affairs, the Ministry of Education, Culture and Science, the Ministry for Health, Welfare and Sports, the Northern Netherlands Collaboration of Provinces (SNN), the Province of Groningen, University Medical Center Groningen, the University of Groningen, Dutch Kidney Foundation and Dutch Diabetes Research Foundation. We thank Behrooz Alizadeh, Annemieke Boesjes, Marcel Bruinenberg, Noortje Festen, Ilja Nolte, Lude Franke, Mitra Valimohammadi for their help in creating the GWAS database, and Rob Bieringa, Chris Döling, Martin Elderson, Joost Keers, Elise Klaver, René Oostergo, Salome Scholtens, Rosalie Visser, Judith Vonk for their work related to data-collection and validation. The authors are grateful to the study participants, the staff from the LifeLines Cohort Study and Medical Biobank Northern Netherlands, and the participating general practitioners and pharmacists. Statistical analyses were carried out on the Genetic Cluster Computer (<http://www.geneticcluster.org>) which is financially supported by the Netherlands Scientific Organization (NWO 480-05-003) along with a supplement from the Dutch Brain Foundation and the VU University Amsterdam.

**PLCO2** - The Prostate, Lung, Colorectal, and Ovarian (PLCO) Cancer Screening Trial was funded by the Intramural Research Program of the Division of Cancer Epidemiology and Genetics, National Cancer Institute, NIH

**PREVEND** - PREVEND genetics is supported by the Dutch Kidney Foundation (Grant E033), the EU project grant GENECURE (FP-6 LSHM CT 2006 037697), the National Institutes of Health (grant LM010098), The Netherlands organisation for health research and development (NWO VENI grant 916.761.70), and the Dutch Inter University Cardiology Institute Netherlands (ICIN). Folkert W. Asselbergs is supported by a clinical fellowship from the Netherlands Organisation for Health Research and Development (ZonMw grant 90700342).

**QIMR** - We are grateful to the twins and their families for their generous participation in these studies. We would like to thank staff at the Queensland Institute of Medical Research: Dixie Statham, Ann Eldridge and Marlene Grace for sample collection, Anjali Henders, Megan Campbell, Lisa Bowdler, Steven Crooks and staff of the Molecular Epidemiology Laboratory for sample processing and preparation, Dale Nyholt, Scott Gordon, Brian McEvoy, Belinda Cornes and Beben Benyamin for data QC and preparation, and David Smyth and Harry Beeby for IT support. We acknowledge funding from the Australian National Health and Medical Research Council (NHMRC grants 241944, 389875, 389891, 389892, 389938, 442915, 442981, 496739, 496688, 552485, 613672, 613601 and 1011506), the U.S. National Institute of Health (grants AA07535, AA10248, AA014041, AA13320, AA13321, AA13326 and DA12854) and the Australian Research Council (ARC grants DP0770096 and DP1093900).

**RS-II, RS-III** - The generation and management of GWAS genotype data for the Rotterdam Study is supported by the Netherlands Organisation of Scientific Research NWO Investments (nr. 175.010.2005.011, 911-03-012). This study is funded by the Research Institute for Diseases in the Elderly (014-93-015; RIDE2), the Netherlands Genomics Initiative (NGI)/Netherlands Organisation for Scientific Research (NWO) project nr. 050-060-810. We thank Pascal Arp, Mila Jhamai, Marijn Verkerk, Lizbeth Herrera and Marjolein Peters for their help in creating the GWAS database, and Karol Estrada and Maksim V. Struchalin for their support in creation and analysis of imputed data. The Rotterdam Study is funded by Erasmus Medical Center and Erasmus University, Rotterdam, Netherlands Organization for the Health Research and Development (ZonMw), the Research Institute for Diseases in the Elderly (RIDE), the Ministry of Education, Culture and Science, the Ministry for Health, Welfare and Sports, the European Commission (DG XII), and the Municipality of Rotterdam. The authors are grateful to the study participants, the staff from the Rotterdam Study and the participating general practitioners and pharmacists.

**TRAILS** - TRAILS (TRacking Adolescents' Individual Lives Survey) is a collaborative project involving various departments of the University Medical Center and University of Groningen, the Erasmus University Medical Center Rotterdam, the University of Utrecht, the Radboud Medical Center Nijmegen, and the Parnassia Bavo group, all in the Netherlands. TRAILS has been financially supported by grants from the Netherlands Organization for Scientific Research NWO (Medical Research Council program grant GB-MW 940-38-011; ZonMW Brainpower grant 100-001-004; ZonMw Risk Behavior and Dependence grants 60-60600-98-018 and 60-60600-97-118; ZonMw Culture and Health grant 261-98-710; Social Sciences Council medium-sized investment grants GB-MaGW 480-01-006 and GB-MaGW 480-07-001; Social Sciences Council project grants GB-MaGW 457-03-018, GB-MaGW 452-04-314, and GB-MaGW 452-06-004; NWO large-sized investment grant 175.010.2003.005; NWO Longitudinal Survey and Panel Funding 481-08-013); the Sophia Foundation for Medical Research (projects 301 and 393), the Dutch Ministry of Justice (WODC), the European Science Foundation (EuroSTRESS project FP-006), and the participating universities. We are grateful to all adolescents, their parents and teachers who participated in this research and to everyone who worked on this project and made it possible.

**TWINGENE** - This work was supported by grants from the Ministry for Higher Education, the Swedish Research Council (M-2005-1112 and 2009-2298), GenomEUtwin (EU/QLRT-2001-01254; QLG2-CT-2002-01254), NIH grant DK U01-066134, The Swedish Foundation for Strategic Research (SSF; ICA08-0047).

## **Stage 2 - MetaboChip replication**

**AMC-PAS** - AMC-PAS is grateful to M.D. Trip MD, PhD and S. Sivapalaratnam MD for their input in collecting the data.

**1958BC** - Collection of DNA in the 1958 Birth Cohort was funded by the Medical Research Council grant G0000934 and Wellcome Trust grant 068545/Z/02. Dr Sue Ring and Dr Wendy McArdle (University of Bristol), and Mr Jon Johnson (Centre for Longitudinal Studies, Institute of Education, London) are thanked for help with data linkage. Work was undertaken at Great Ormond Street Hospital /University College London, Institute of Child Health which received a proportion of funding from the Department of Health's National Institute of Health Research



('Biomedical Research Centres' funding). The Medical Research Council provides funds for the MRC Centre of Epidemiology for Child Health.

**CARDIOGENICS / THISEAS / AMC-PAS** - This work was funded by the Wellcome Trust. We like to thank the members of the WTSI Genotyping Facility in particular Sarah Edkins and Cordelia Langford

**CARDIOGENICS** - Sample collection in the Cardiogenics Consortium (<http://www.cardiogenics.eu/web/>) was funded by the 6th Framework Program of the European Union (LSHM-CT-2006-037593) and supported through the Cambridge Bioresource which is funded by the NIHR Cambridge Biomedical research Centre. We thank all the participants and clinicians involved in the recruitment process at Cambridge and Leicester (UK), Luebeck and Regensburg (Germany), and Paris (France).

**DPS** - The DPS has been financially supported by grants from the Academy of Finland (117844 and 40758, 211497, and 118590; The EVO funding of the Kuopio University Hospital from Ministry of Health and Social Affairs (5254), Finnish Funding Agency for Technology and Innovation (40058/07), Nordic Centre of Excellence on Systems biology in controlled dietary interventions and cohort studies, SYSDIET (070014), The Finnish Diabetes Research Foundation, Yrjö Jahnsson Foundation (56358), Sigrid Juselius Foundation, Juho Vainio Foundation and TEKES grants 70103/06 and 40058/07.

**DILGOM** - The DILGOM study has been funded by the Academy of Finland (grant numbers 139635, 129494, 118065, 129322, 250207), the Orion-Farmos Research Foundation, the Finnish Foundation for Cardiovascular Research, and the Sigrid Jusélius Foundation.

**DR's EXTRA** - The DR.s EXTRA Study was supported by grants to R. Rauramaa by the Ministry of Education and Culture of Finland (627;2004-2011), Academy of Finland (102318; 123885), Kuopio University Hospital, Finnish Diabetes Association, Finnish Heart Association, Päivikki and Sakari Sohlberg Foundation and by grants from European Commission FP6 Integrated Project (EXGENESIS); LSHM-CT-2004-005272, City of Kuopio and Social Insurance Institution of Finland (4/26/2010).

**Ely** - The MRC Ely Study was funded by the Medical Research Council and the Wellcome Trust. We are most grateful to all study participants and to the staff of the St. Mary's Street Surgery, Ely. We thank all the staff who worked on the study.

**EPIC** - The EPIC Norfolk Study is funded by Cancer Research United Kingdom and the Medical Research Council.

**FIN-D2D 2007** - The FIN-D2D study has been financially supported by the hospital districts of Pirkanmaa, South Ostrobothnia, and Central Finland, the Finnish National Public Health Institute (current National Institute for Health and Welfare), the Finnish Diabetes Association, the Ministry of Social Affairs and Health in Finland, the Academy of Finland (grant number 129293), Commission of the European Communities, Directorate C-Public Health (grant agreement no. 2004310) and Finland's Slottery Machine Association.

**FENLAND** - The Fenland Study is funded by the Wellcome Trust and the Medical Research Council, as well as by the Support for Science Funding programme and CamStrad. We are grateful to all the volunteers for their time and help, and to the General Practitioners and practice staff for help with recruitment. We thank the Fenland Study co-ordination team and the Field Epidemiology team of the MRC Epidemiology Unit for recruitment and clinical testing.

**GLACIER** - The GLACIER Study was funded by grants from the Swedish Diabetes Association, Swedish Heart-Lung Foundation, Swedish Research Council, Medical Research Foundation of Umeå University, and Novo Nordisk (all to PWF). Genotyping for the GLACIER Study was funded by the Wellcome Trust. We thank the participants for their outstanding contributions to the GLACIER Study. We also thank the staff of the Umeå Medical Biobank, especially Göran Hallmans, Åsa Agren, John Huttilainen, and Ann-Marie Ahren for data retrieval and organisation and Kerstin Enquist and Tore Johansson for expert assistance with DNA extraction and plating. The GLACIER Study is nested within the Västerbottens Intervention Project (VIP); we thank the staff of the VIP Study for phenotype data collection, particularly Lars Wennhall who leads the VIP Study. Inês Barroso acknowledges funding from the Wellcome Trust grant 077016/Z/05/Z, United Kingdom NIHR Cambridge Biomedical Research Centre and the MRC Centre for Obesity and Related Metabolic Diseases. We would like to thank Emma Gray, Douglas Simpkin, Sarah Hunt and staff of the WTSI Sample Logistics, Genotyping and Variation Informatics Facilities.

**Go-DARTS (DUNDEE)** - We acknowledge the support of the Health Informatics Centre, University of Dundee for managing and supplying the anonymised data and NHS Tayside, the original data owner. We are grateful to all the participants who took part in the Go-DARTS study, to the general practitioners, to the Scottish School of Primary Care for their help in

recruiting the participants, and to the whole team, which includes interviewers, computer and laboratory technicians, clerical workers, research scientists, volunteers, managers, receptionists, and nurses. The Wellcome Trust provides support for Wellcome Trust United Kingdom Type 2 Diabetes Case Control Collection (Go-DARTS) and the Scottish Health Informatics Programme. Further informatics support is provided by the Chief Scientist Office of Scotland. This work was also supported by the UK Medical Research Council (G0601261)

**HNR** - We thank the Heinz Nixdorf Foundation, Germany, and Deutsche Forschungsgemeinschaft (project ER 155/6-2) for the generous support of this study. We acknowledge the support of the Sarstedt AG & Co. (Nümbrecht, Germany) concerning laboratory equipment. We are grateful to Prof. Raimund Erbel (Clinic of Cardiology, West German Heart Centre, University Hospital of Essen, University Duisburg-Essen, Germany), Prof. Dr. Susanne Moebus (Institute for Medical Informatics, Biometry and Epidemiology (IMIBE), University Hospital of Essen, University of Duisburg-Essen, Essen, Germany) and Prof. Dirk Schadendorf (Clinic Department of Dermatology, University Hospital Essen, University Duisburg-Essen, Essen, Germany) for funding this study.

**HUNT2** - The Nord-Trøndelag Health Study (The HUNT Study) is a collaboration between HUNT Research Centre (Faculty of Medicine, Norwegian University of Science and Technology NTNU), Nord-Trøndelag County Council, Central Norway Health Authority, and the Norwegian Institute of Public Health.

**IMPROVE** - The IMPROVE study was funded by the European Commission (Contract number: QLG1-CT-2002-00896), the Swedish Heart-Lung Foundation, the Swedish Research Council (8691), the Knut and Alice Wallenberg Foundation, the Foundation for Strategic Research, the Torsten and Ragnar Söderberg Foundation, the Strategic Cardiovascular Programme of Karolinska Institutet and the Stockholm County Council, the Strategic support for epidemiological research at Karolinska Institutet and the Stockholm County Council and the Stockholm County Council (560183).

**KORA S3 and S4** - The KORA Augsburg studies were financed by the Helmholtz Zentrum München, German Research Center for Environmental Health, Neuherberg, Germany and supported by grants from the German Federal Ministry of Education and Research (BMBF). Part of this work was financed by the German National Genome Research Network (grant number

NGFNPLUS 01GS0823). Our research was supported within the Munich Center of Health Sciences (MC Health) as part of LMUinnovativ.

**LURIC** - LURIC received funding through the 6th Framework Program (integrated project Bloodomics, grant LSHM-CT-2004-503485) and 7th of Framework Program (integrated project AtheroRemo, Grant Agreement number 201668) of the European Union. The authors extend appreciation to the participants of the LURIC study without their collaboration this article would not have been written. We thank the LURIC study team either temporarily or permanently involved in patient recruitment, sample and data handling, and the laboratory staff at the Ludwigshafen General Hospital and the Universities of Freiburg and Ulm, Germany.

**METSIM** - The METSIM study was funded by the Academy of Finland (grants no. 77299 and 124243).

**MORGAM** - The MORGAM study was part funded through the European Community's Sixth Framework Programme Cardiogenics project, grant agreement LSHM-CT-2006-037593 and Seventh Framework Programme ENGAGE project, grant agreement HEALTH-F4-2007-201413. Sites and key personnel of contributing MORGAM Centres: Finland) FINRISK, National Institute for Health and Welfare, Helsinki: V. Salomaa (principal investigator), A. Juolevi, E. Vartiainen, P. Jousilahti; ATBC, National Institute for Health and Welfare, Helsinki: J. Virtamo (principal investigator), H. Kumpulainen; MORGAM Data Centre, National Institute for Health and Welfare, Helsinki: K. Kuulasmaa (responsible person), Z. Cepaitis, A. Haukijärvi, B. Joseph, J. Karvanen, S. Kulathinal, M. Niemelä, O. Saarela; MORGAM Central Laboratory, National Institute for Health and Welfare, Helsinki: M. Perola (responsible person), P. Laiho, M. Sauramo. The ATBC Study was supported by US Public Health Service contracts N01-CN-45165, N01-RC-45035 and N01-RC-37004 from the National Cancer Institute. France) National Coordinating Centre, National Institute of Health and Medical Research (U258), Paris: P. Ducimetière (national coordinator), A. Bingham; PRIME/Strasbourg, Department of Epidemiology and Public Health, EA 3430, University of Strasbourg, Faculty of Medicine, Strasbourg: D. Arveiler (principal investigator), B. Haas, A. Wagner; PRIME/Toulouse, Department of Epidemiology, Toulouse University School of Medicine, Toulouse: J. Ferrières (Principal Investigator), J-B. Ruidavets, V. Bongard, D. Deckers, C. Saulet, S. Barrere; PRIME/Lille, Department of Epidemiology and Public Health, INSERM U744-Université Lille Nord de France – Institut Pasteur de Lille: P. Amouyel (principal investigator), M. Montaye, B.

Lemaire, S. Beauchant, D. Cotel, C. Graux, N. Marecaux, C. Steclebout, S. Szeremeta; MORGAM Laboratory, INSERM U937, Paris: F. Cambien (responsible person), L. Tiret, V. Nicaud. Italy) Centro Ricerche EPIMED - Epidemiologia e Medicina Preventiva, Dipartimento di Medicina Sperimentale. Università degli Studi dell'Insubria, Varese: M. Ferrario (principal investigator), G. Veronesi. Research Centre on Public Health, University of Milano-Bicocca, Monza, Italy: Giancarlo Cesana. This study was supported by the Health Administration of Regione Lombardia [grant numbers 9783/1986, 41795/1993, 31737/1997 and 17155/2004], for the baseline examinations and the follow-up. United Kingdom) PRIME/Belfast, Queen's University Belfast, Belfast, Northern Ireland: F. Kee (principal investigator) A. Evans (former principal investigator), J. Yarnell, E. Gardner; MORGAM Coordinating Centre, Queen's University Belfast, Belfast, Northern Ireland: A. Evans (MORGAM coordinator), S. Cashman, F. Kee. MORGAM Management Group: A. Evans (chair, Belfast, UK), S. Blankenberg (Hamburg, Germany), F. Cambien (Paris, France), M. Ferrario (Varese, Italy), K. Kuulasmaa (Helsinki, Finland), A. Palotie (Cambridge, UK), M. Perola (Helsinki, Finland), A. Peters (Neuherberg, Germany), V. Salomaa (Helsinki, Finland), H. Tunstall-Pedoe (Dundee, Scotland), P.G. Wiklund (Umeå, Sweden); Previous members: K. Asplund (Stockholm, Sweden), L. Peltonen (Helsinki, Finland), D. Shields (Dublin, Ireland), B. Stegmayr (Umeå, Sweden).

**NSHD** - This work was funded by the Medical Research Council [Unit Programme number U123092720]. We are very grateful to the members of this birth cohort for their continuing interest and participation in the study.

**PIVUS** - This project was supported by grants from the Swedish Research Council, the Swedish Heart-Lung Foundation, the Swedish Foundation for Strategic Research, the Royal Swedish Academy of Sciences, Swedish Diabetes Foundation, Swedish Society of Medicine, and Novo Nordisk Fonden. Genotyping was performed by the SNP&SEQ Technology Platform in Uppsala ([www.genotyping.se](http://www.genotyping.se)). We thank Tomas Axelsson, Ann-Christine Wiman and Caisa Pöntinen for their excellent assistance with genotyping. The SNP Technology Platform is supported by Uppsala University, Uppsala University Hospital and the Swedish Research Council for Infrastructures.

**STR** - This work was supported by grants from the US National Institutes of Health (AG028555, AG08724, AG04563, AG10175, AG08861), the Swedish Research Council, the Swedish Heart-Lung Foundation, the Swedish Foundation for Strategic Research, the Royal Swedish Academy

of Science, and ENGAGE (within the European Union Seventh Framework Programme, HEALTH-F4-2007-201413). Genotyping was performed by the SNP&SEQ Technology Platform in Uppsala ([www.genotyping.se](http://www.genotyping.se)). We thank Tomas Axelsson, Ann-Christine Wiman and Caisa Pöntinen for their excellent assistance with genotyping. The SNP Technology Platform is supported by Uppsala University, Uppsala University Hospital and the Swedish Research Council for Infrastructures.

**T2D WTCCC** - Research funding for sample collection, genotyping and data analysis for the T2D-WTCCC and other cohorts for which the Oxford group had responsibility came from the British Diabetes Association, BDA Research, Diabetes UK, Oxford NIHR Biomedical Research Centre, European Commission (ENGAGE: HEALTH-F4-2007-201413; EURODIA: LSHG-CT-2004-518153, Wellcome Trust (072960, 076113/B/04/Z, 076113/K/04/Z, 083270, 085301, 079557, 081682, 075491) UK Medical Research Council (G0000649,G0601261) and NIDDK (R01-DK-073490). In addition, Cecilia Lindgren is funded by WT086596/Z/08/Z (Wellcome Trust Research Career Development Fellowship); Reedik Mägi is funded by European Commission under the Marie Curie Intra-European Fellowship; and Mark McCarthy receives personal funding from the Oxford NIHR Biomedical Research Centre.

**THISEAS** - Recruitment for THISEAS was partially funded by a research grant (PENED 2003) from the Greek General Secretary of Research and Technology; we thank all the dieticians and clinicians for their contribution to the project.

**Tromsø 4** - University of Tromsø, Norwegian Research Council (project number 185764)

**ULSAM** - This project was supported by grants from the Swedish Research Council, the Swedish Heart-Lung Foundation, the Swedish Foundation for Strategic Research, the Royal Swedish Academy of Sciences, Swedish Diabetes Foundation, Swedish Society of Medicine, and Novo Nordisk Fonden. Genotyping was performed by the SNP&SEQ Technology Platform in Uppsala ([www.genotyping.se](http://www.genotyping.se)). We thank Tomas Axelsson, Ann-Christine Wiman and Caisa Pöntinen for their excellent assistance with genotyping. The SNP Technology Platform is supported by Uppsala University, Uppsala University Hospital and the Swedish Research Council for Infrastructures.

**Whitehall II** - The WHII study has been supported by grants from the Medical Research Council; Economic and Social Research Council; BHF; Health and Safety Executive; Department of Health; National Heart Lung and Blood Institute (HL36310), US, NIH: National

Institute on Aging (AG13196), US, NIH; Agency for Health Care Policy Research (HS06516); and the John D and Catherine T MacArthur Foundation Research Networks on Successful Midlife Development and Socioeconomic Status and Health. Genotyping in WHII was supported by BHF grant PG/07/133/24260

**Other contributing studies: clinically extremes**

**Essen Obesity Study (Essen Case-Control GWAS & Essen Obesity Trio GWAS)** - We thank all the participants of this study. This work was supported by grants from the Federal Ministry of Education and Research (BMBF: 01GI0823; NGFN-plus: 01GS0820, 01GS0830, 01KU0903) and the Deutsche Forschungsgemeinschaft (DFG; HE 1446/4-1).

**French Extreme Obesity Study** - The study was supported by le Conseil Régional Nord Pas de Calais/FEDER and the Agence Nationale de la Recherche. D.M. is funded by a Canada Research Chair. We are indebted to all subjects who participated in these studies.

**GEO-IT** - Financial support has been provided by the Italian Health Ministry. Istituto Auxologico Italiano: S. Mai, S. Maestrini, M. Mencarelli. Monica/Brianza Research Group : G. Cesana, P. Brambilla, M. Ferrario, R. Sega, C. Menni and Lombardy Health Directorate. Brianza cohort study was mainly funded by the Health Administration of Regione Lombardia, Italy.

**GOYA** - This study was conducted as part of the activities of the Danish Obesity Research Centre (DanORC, [www.danorc.dk](http://www.danorc.dk)) and the MRC centre for Causal Analyses in Translational Epidemiology (MRC CAiTE). LP was supported and the genotyping for GOYA funded by the Wellcome Trust (WT 084762). LP and DME were supported by a Medical Council New Investigator Award (MRC G0800582 to DME). GOYA is a nested study within The Danish National Birth Cohort which was established with major funding from the Danish National Research Foundation. Additional support for this cohort has been obtained from the Pharmacy Foundation, the Egmont Foundation, The March of Dimes Birth Defects Foundation, the Augustinus Foundation, and the Health Foundation.

## D. References

1. Lee, S.H., Goddard, M.E., Wray, N.R. & Visscher, P.M. A Better Coefficient of Determination for Genetic Profile Analysis. *Genet Epidemiol* **36**, 214–224 (2012).
2. Johnson, A.D. *et al.* SNAP: a web-based tool for identification and annotation of proxy SNPs using HapMap. *Bioinformatics* **24**, 2938-9 (2008).
3. Zhang, M. *et al.* Paracrine overexpression of IGFBP-4 in osteoblasts of transgenic mice decreases bone turnover and causes global growth retardation. *Journal of bone and mineral research* **18**, 836-43 (2003).
4. Yamaguchi, T. *et al.* Serum levels of insulin-like growth factor (IGF); IGF-binding proteins-3, -4, and -5; and their relationships to bone mineral density and the risk of vertebral fractures in postmenopausal women. *Calcif Tissue Int* **78**, 18-24 (2006).
5. Bicknell, L.S. *et al.* Mutations in the pre-replication complex cause Meier-Gorlin syndrome. *Nat Genet* **43**, 356-9 (2011).
6. Kim, J.J. *et al.* Identification of 15 loci influencing height in a Korean population. *J Hum Genet* **55**, 27-31 (2010).
7. Torgerson, D.G. *et al.* Meta-analysis of genome-wide association studies of asthma in ethnically diverse North American populations. *Nat Genet* **43**, 887-92 (2011).
8. Ferreira, M.A. *et al.* Association between ORMDL3, IL1RL1 and a deletion on chromosome 17q21 with asthma risk in Australia. *Eur J Hum Genet* **19**, 458-64 (2011).
9. Moffatt, M.F. *et al.* A large-scale, consortium-based genomewide association study of asthma. *N Engl J Med* **363**, 1211-21 (2010).
10. Moffatt, M.F. *et al.* Genetic variants regulating ORMDL3 expression contribute to the risk of childhood asthma. *Nature* **448**, 470-3 (2007).
11. Anderson, C.A. *et al.* Meta-analysis identifies 29 additional ulcerative colitis risk loci, increasing the number of confirmed associations to 47. *Nat Genet* **43**, 246-52 (2011).
12. McGovern, D.P. *et al.* Genome-wide association identifies multiple ulcerative colitis susceptibility loci. *Nat Genet* **42**, 332-7 (2010).
13. Plagnol, V. *et al.* Genome-wide association analysis of autoantibody positivity in type 1 diabetes cases. *PLoS Genet* **7**, e1002216 (2011).
14. Barrett, J.C. *et al.* Genome-wide association study and meta-analysis find that over 40 loci affect risk of type 1 diabetes. *Nat Genet* **41**, 703-7 (2009).
15. Stahl, E.A. *et al.* Genome-wide association study meta-analysis identifies seven new rheumatoid arthritis risk loci. *Nat Genet* **42**, 508-14 (2010).
16. Barrett, J.C. *et al.* Genome-wide association defines more than 30 distinct susceptibility loci for Crohn's disease. *Nat Genet* **40**, 955-62 (2008).
17. Okada, Y. *et al.* Identification of nine novel loci associated with white blood cell subtypes in a Japanese population. *PLoS Genet* **7**, e1002067 (2011).
18. Soranzo, N. *et al.* A genome-wide meta-analysis identifies 22 loci associated with eight hematological parameters in the HaemGen consortium. *Nat Genet* **41**, 1182-90 (2009).
19. Volpi, A. *et al.* Acute renal failure in elderly due to Goodpasture's syndrome. *Nephron* **57**, 381-2 (1991).
20. Liu, X. *et al.* Genome-wide meta-analyses identify three loci associated with primary biliary cirrhosis. *Nat Genet* **42**, 658-60 (2010).
21. Hirschfield, G.M. *et al.* Primary biliary cirrhosis associated with HLA, IL12A, and IL12RB2 variants. *N Engl J Med* **360**, 2544-55 (2009).



22. Moon, S.S. *et al.* Relationship of 11beta-hydroxysteroid dehydrogenase type 1 and hexose-6-phosphate dehydrogenase gene polymorphisms with metabolic syndrome and type 2 diabetes. *Endocr J* **58**, 949-59 (2011).
23. Senesi, S. *et al.* Hexose-6-phosphate dehydrogenase in the endoplasmic reticulum. *Biol Chem* **391**, 1-8 (2010).
24. Draper, N. *et al.* Mutations in the genes encoding 11beta-hydroxysteroid dehydrogenase type 1 and hexose-6-phosphate dehydrogenase interact to cause cortisone reductase deficiency. *Nat Genet* **34**, 434-9 (2003).
25. Uckaya, G. *et al.* Adipose tissue 11-beta-Hydroxysteroid Dehydrogenase Type 1 and Hexose-6-Phosphate Dehydrogenase gene expressions are increased in patients with type 2 diabetes mellitus. *Diabetes Res Clin Pract* **82 Suppl 2**, S135-40 (2008).
26. Lavery, G.G. *et al.* Deletion of hexose-6-phosphate dehydrogenase activates the unfolded protein response pathway and induces skeletal myopathy. *J Biol Chem* **283**, 8453-61 (2008).
27. Ramdas, W.D. *et al.* A genome-wide association study of optic disc parameters. *PLoS Genet* **6**, e1000978 (2010).
28. Ripke, S. *et al.* Genome-wide association study identifies five new schizophrenia loci. *Nat Genet* **43**, 969-76 (2011).
29. Jin, Y. *et al.* Variant of TYR and autoimmunity susceptibility loci in generalized vitiligo. *N Engl J Med* **362**, 1686-97 (2010).
30. Potkin, S.G. *et al.* Gene discovery through imaging genetics: identification of two novel genes associated with schizophrenia. *Mol Psychiatry* **14**, 416-28 (2009).
31. Yu, L. *et al.* Shox2 is required for chondrocyte proliferation and maturation in proximal limb skeleton. *Dev Biol* **306**, 549-59 (2007).
32. Jin, Y., Mertens, F., Kullendorff, C.M. & Panagopoulos, I. Fusion of the tumor-suppressor gene CHEK2 and the gene for the regulatory subunit B of protein phosphatase 2 PPP2R2A in childhood teratoma. *Neoplasia* **8**, 413-8 (2006).
33. Jimenez, M.A., Akerblad, P., Sigvardsson, M. & Rosen, E.D. Critical role for Ebf1 and Ebf2 in the adipogenic transcriptional cascade. *Mol Cell Biol* **27**, 743-57 (2007).
34. Kieslinger, M. *et al.* EBF2 regulates osteoblast-dependent differentiation of osteoclasts. *Dev Cell* **9**, 757-67 (2005).
35. Sarbassov, D.D. & Sabatini, D.M. Redox regulation of the nutrient-sensitive raptor-mTOR pathway and complex. *J Biol Chem* **280**, 39505-9 (2005).
36. Toma, C. *et al.* Association study of six candidate genes asymmetrically expressed in the two cerebral hemispheres suggests the involvement of BAIAP2 in autism. *J Psychiatr Res* **45**, 280-2 (2011).
37. Ribases, M. *et al.* Case-control study of six genes asymmetrically expressed in the two cerebral hemispheres: association of BAIAP2 with attention-deficit/hyperactivity disorder. *Biol Psychiatry* **66**, 926-34 (2009).
38. Yashin, A.I., Wu, D., Arbeev, K.G. & Ukraintseva, S.V. Joint influence of small-effect genetic variants on human longevity. *Aging (Albany NY)* **2**, 612-20 (2010).
39. Kamada, F. *et al.* A genome-wide association study identifies RNF213 as the first Moyamoya disease gene. *J Hum Genet* **56**, 34-40 (2011).
40. Speliotes, E.K. *et al.* Association analyses of 249,796 individuals reveal 18 new loci associated with body mass index. *Nat Genet* **42**, 937-48 (2010).

41. Franke, A. *et al.* Systematic association mapping identifies NELL1 as a novel IBD disease gene. *PLoS One* **2**, e691 (2007).
42. Luciano, M. *et al.* Whole genome association scan for genetic polymorphisms influencing information processing speed. *Biol Psychol* **86**, 193-202 (2011).
43. Chen, C.K. *et al.* Replacing the rod with the cone transducin subunit decreases sensitivity and accelerates response decay. *J Physiol* **588**, 3231-41 (2010).
44. Shi, J. & Kandror, K.V. Sortilin is essential and sufficient for the formation of Glut4 storage vesicles in 3T3-L1 adipocytes. *Dev Cell* **9**, 99-108 (2005).
45. Kaddai, V. *et al.* Involvement of TNF-alpha in abnormal adipocyte and muscle sortilin expression in obese mice and humans. *Diabetologia* **52**, 932-40 (2009).
46. Kjolby, M. *et al.* Sort1, encoded by the cardiovascular risk locus 1p13.3, is a regulator of hepatic lipoprotein export. *Cell Metab* **12**, 213-23 (2010).
47. Flynn, R.S., Mahavadi, S., Murthy, K.S., Kellum, J.M. & Kuemmerle, J.F. Insulin-like growth factor-binding protein-5 stimulates growth of human intestinal muscle cells by activation of G $\alpha$ i3. *Am J Physiol Gastrointest Liver Physiol* **297**, G1232-8 (2009).
48. Bessa, S.S., Ali, E.M. & Hamdy, S.M. The role of glutathione S-transferase M1 and T1 gene polymorphisms and oxidative stress-related parameters in Egyptian patients with essential hypertension. *Eur J Intern Med* **20**, 625-30 (2009).
49. Hori, M. *et al.* Combined glutathione S-transferase T1 and M1 positive genotypes afford protection against type 2 diabetes in Japanese. *Pharmacogenomics* **8**, 1307-14 (2007).
50. Yalin, S. *et al.* Glutathione S-transferase gene polymorphisms in Turkish patients with diabetes mellitus. *Cell Biochem Funct* **25**, 509-13 (2007).
51. Kim, S.J. *et al.* Impact of glutathione S-transferase M1 and T1 gene polymorphisms on the smoking-related coronary artery disease. *J Korean Med Sci* **23**, 365-72 (2008).
52. Masetti, S. *et al.* Interactive effect of the glutathione S-transferase genes and cigarette smoking on occurrence and severity of coronary artery risk. *J Mol Med (Berl)* **81**, 488-94 (2003).
53. Teslovich, T.M. *et al.* Biological, clinical and population relevance of 95 loci for blood lipids. *Nature* **466**, 707-13 (2010).
54. Aulchenko, Y.S. *et al.* Loci influencing lipid levels and coronary heart disease risk in 16 European population cohorts. *Nat Genet* **41**, 47-55 (2009).
55. Sabatti, C. *et al.* Genome-wide association analysis of metabolic traits in a birth cohort from a founder population. *Nat Genet* **41**, 35-46 (2009).
56. Sandhu, M.S. *et al.* LDL-cholesterol concentrations: a genome-wide association study. *Lancet* **371**, 483-91 (2008).
57. Kathiresan, S. *et al.* Six new loci associated with blood low-density lipoprotein cholesterol, high-density lipoprotein cholesterol or triglycerides in humans. *Nat Genet* **40**, 189-97 (2008).
58. Willer, C.J. *et al.* Newly identified loci that influence lipid concentrations and risk of coronary artery disease. *Nat Genet* **40**, 161-9 (2008).
59. Wallace, C. *et al.* Genome-wide association study identifies genes for biomarkers of cardiovascular disease: serum urate and dyslipidemia. *Am J Hum Genet* **82**, 139-49 (2008).
60. Schunkert, H. *et al.* Large-scale association analysis identifies 13 new susceptibility loci for coronary artery disease. *Nat Genet* **43**, 333-8 (2011).

61. A genome-wide association study in Europeans and South Asians identifies five new loci for coronary artery disease. *Nat Genet* **43**, 339-44 (2011).
62. Lettre, G. *et al.* Genome-wide association study of coronary heart disease and its risk factors in 8,090 African Americans: the NHLBI CARE Project. *PLoS Genet* **7**, e1001300 (2011).
63. Waterworth, D.M. *et al.* Genetic variants influencing circulating lipid levels and risk of coronary artery disease. *Arterioscler Thromb Vasc Biol* **30**, 2264-76 (2010).
64. Kathiresan, S. *et al.* Genome-wide association of early-onset myocardial infarction with single nucleotide polymorphisms and copy number variants. *Nat Genet* **41**, 334-41 (2009).
65. Samani, N.J. *et al.* Genomewide association analysis of coronary artery disease. *N Engl J Med* **357**, 443-53 (2007).
66. Carrasquillo, M.M. *et al.* Genome-wide screen identifies rs646776 near sortilin as a regulator of progranulin levels in human plasma. *Am J Hum Genet* **87**, 890-7 (2010).
67. Kim, Y.J. *et al.* Large-scale genome-wide association studies in East Asians identify new genetic loci influencing metabolic traits. *Nat Genet* **43**, 990-5 (2011).
68. Grallert, H. *et al.* Eight genetic loci associated with variation in lipoprotein-associated phospholipase A2 mass and activity and coronary heart disease: meta-analysis of genome-wide association studies from five community-based studies. *Eur Heart J* **33**, 238-51 (2012).
69. Suchindran, S. *et al.* Genome-wide association study of Lp-PLA(2) activity and mass in the Framingham Heart Study. *PLoS Genet* **6**, e1000928 (2010).
70. Barber, M.J. *et al.* Genome-wide association of lipid-lowering response to statins in combined study populations. *PLoS One* **5**, e9763 (2010).
71. Middelberg, R.P. *et al.* Genetic variants in LPL, OASL and TOMM40/APOE-C1-C2-C4 genes are associated with multiple cardiovascular-related traits. *BMC Med Genet* **12**, 123 (2011).
72. Albagha, O.M. *et al.* Genome-wide association identifies three new susceptibility loci for Paget's disease of bone. *Nat Genet* **43**, 685-9 (2011).
73. Albagha, O.M. *et al.* Genome-wide association study identifies variants at CSF1, OPTN and TNFRSF11A as genetic risk factors for Paget's disease of bone. *Nat Genet* **42**, 520-4 (2010).
74. Shi, J. *et al.* Genome-wide association study of recurrent early-onset major depressive disorder. *Mol Psychiatry* **16**, 193-201 (2011).
75. Kottgen, A. *et al.* New loci associated with kidney function and chronic kidney disease. *Nat Genet* **42**, 376-84 (2010).
76. Mosing, M.A. *et al.* A genome-wide association study of self-rated health. *Twin Res Hum Genet* **13**, 398-403 (2010).
77. Kasperaviciute, D. *et al.* Common genetic variation and susceptibility to partial epilepsies: a genome-wide association study. *Brain* **133**, 2136-47 (2010).
78. Zabaneh, D. & Balding, D.J. A genome-wide association study of the metabolic syndrome in Indian Asian men. *PLoS One* **5**, e11961 (2010).
79. Nicolas, E. *et al.* CAMOS, a nonprogressive, autosomal recessive, congenital cerebellar ataxia, is caused by a mutant zinc-finger protein, ZNF592. *Eur J Hum Genet* **18**, 1107-13 (2010).

80. Halldorsdottir, A.M. *et al.* High-resolution genomic screening in mantle cell lymphoma--specific changes correlate with genomic complexity, the proliferation signature and survival. *Genes Chromosomes Cancer* **50**, 113-21 (2011).
81. Schymick, J.C. *et al.* Genome-wide genotyping in amyotrophic lateral sclerosis and neurologically normal controls: first stage analysis and public release of data. *Lancet Neurol* **6**, 322-8 (2007).
82. Ganesh, S.K. *et al.* Multiple loci influence erythrocyte phenotypes in the CHARGE Consortium. *Nat Genet* **41**, 1191-8 (2009).
83. Aston, K.I. & Carrell, D.T. Genome-wide study of single-nucleotide polymorphisms associated with azoospermia and severe oligozoospermia. *J Androl* **30**, 711-25 (2009).
84. Habuchi, H. *et al.* The occurrence of three isoforms of heparan sulfate 6-O-sulfotransferase having different specificities for hexuronic acid adjacent to the targeted N-sulfoglucosamine. *J Biol Chem* **275**, 2859-68 (2000).
85. Huang, Y.C. *et al.* Genome-wide association study of diabetic retinopathy in a Taiwanese population. *Ophthalmology* **118**, 642-8 (2011).
86. Heath, A.C. *et al.* A quantitative-trait genome-wide association study of alcoholism risk in the community: findings and implications. *Biol Psychiatry* **70**, 513-8 (2011).
87. Krebs, A.R. *et al.* ATAC and Mediator coactivators form a stable complex and regulate a set of non-coding RNA genes. *EMBO Rep* **11**, 541-7 (2010).
88. Guelman, S. *et al.* The double-histone-acetyltransferase complex ATAC is essential for mammalian development. *Mol Cell Biol* **29**, 1176-88 (2009).
89. Van Rompay, A.R., Johansson, M. & Karlsson, A. Identification of a novel human adenylate kinase. cDNA cloning, expression analysis, chromosome localization and characterization of the recombinant protein. *Eur J Biochem* **261**, 509-17 (1999).
90. Hassel, D. *et al.* Nexilin mutations destabilize cardiac Z-disks and lead to dilated cardiomyopathy. *Nat Med* **15**, 1281-8 (2009).
91. Wang, H. *et al.* Mutations in NEXN, a Z-disc gene, are associated with hypertrophic cardiomyopathy. *Am J Hum Genet* **87**, 687-93 (2010).
92. Katoh, M. GIPC gene family (Review). *Int J Mol Med* **9**, 585-9 (2002).
93. Kirikoshi, H. & Katoh, M. Molecular cloning and characterization of human GIPC2, a novel gene homologous to human GIPC1 and *Xenopus* Kermit. *Int J Oncol* **20**, 571-6 (2002).
94. Li, Y., Willer, C., Sanna, S. & Abecasis, G. Genotype imputation. *Annu Rev Genomics Hum Genet* **10**, 387-406 (2009).
95. Marchini, J., Howie, B., Myers, S., McVean, G. & Donnelly, P. A new multipoint method for genome-wide association studies by imputation of genotypes. *Nat Genet* **39**, 906-13 (2007).
96. Guan, Y. & Stephens, M. Practical issues in imputation-based association mapping. *PLoS Genet* **4**, e1000279 (2008).
97. Abecasis, G.R. & Wigginton, J.E. Handling marker-marker linkage disequilibrium: pedigree analysis with clustered markers. *Am J Hum Genet* **77**, 754-67 (2005).
98. Purcell, S. *et al.* PLINK: a tool set for whole-genome association and population-based linkage analyses. *Am J Hum Genet* **81**, 559-75 (2007).
99. Aulchenko, Y.S., Struchalin, M.V. & van Duijn, C.M. ProbABEL package for genome-wide association analysis of imputed data. *BMC Bioinformatics* **11**, 134 (2010).

100. Aulchenko, Y.S., Ripke, S., Isaacs, A. & van Duijn, C.M. GenABEL: an R library for genome-wide association analysis. *Bioinformatics* **23**, 1294-6 (2007).
101. Willer, C.J., Li, Y. & Abecasis, G.R. METAL: fast and efficient meta-analysis of genomewide association scans. *Bioinformatics* **26**, 2190-1 (2010).
102. Yang, J. *et al.* Conditional and joint multiple-SNP analysis of GWAS summary statistics identifies additional variants influencing complex traits. *Nat Genet* **44**, 369-75 (2012).
103. Heid, I.M. *et al.* Meta-analysis identifies 13 new loci associated with waist-hip ratio and reveals sexual dimorphism in the genetic basis of fat distribution. *Nat Genet* **42**, 949-60 (2010).
104. Lango Allen, H. *et al.* Hundreds of variants clustered in genomic loci and biological pathways affect human height. *Nature* **467**, 832-8 (2010).
105. Ehret, G.B. *et al.* Genetic variants in novel pathways influence blood pressure and cardiovascular disease risk. *Nature* **478**, 103-9 (2011).
106. Dupuis, J. *et al.* New genetic loci implicated in fasting glucose homeostasis and their impact on type 2 diabetes risk. *Nat Genet* **42**, 105-16 (2010).
107. Saxena, R. *et al.* Genetic variation in GIPR influences the glucose and insulin responses to an oral glucose challenge. *Nat Genet* **42**, 142-8 (2010).
108. Wang, K., Li, M. & Hakonarson, H. ANNOVAR: functional annotation of genetic variants from high-throughput sequencing data. *Nucleic Acids Res* **38**, e164 (2010).
109. Emilsson, V. *et al.* Genetics of gene expression and its effect on disease. *Nature* **452**, 423-8 (2008).
110. Dixon, A.L. *et al.* A genome-wide association study of global gene expression. *Nat Genet* **39**, 1202-7 (2007).
111. Zhong, H., Yang, X., Kaplan, L.M., Molony, C. & Schadt, E.E. Integrating pathway analysis and genetics of gene expression for genome-wide association studies. *Am J Hum Genet* **86**, 581-91 (2010).
112. Min, J.L. *et al.* Coexpression Network Analysis in Abdominal and Gluteal Adipose Tissue Reveals Regulatory Genetic Loci for Metabolic Syndrome and Related Phenotypes. *PLoS Genet* **8**, e1002505 (2012).
113. Benjamini, Y. & Hochberg, Y. Controlling the false discovery rate: a practical and powerful approach to multiple testing. *Journal of the Royal Statistical Society, Series B (Methodological)* **57**, 289-300 (1995).
114. Myers, A.J. *et al.* A survey of genetic human cortical gene expression. *Nat Genet* **39**, 1494-9 (2007).
115. Purcell, S.M. *et al.* Common polygenic variation contributes to risk of schizophrenia and bipolar disorder. *Nature* **460**, 748-52 (2009).
